# Supplementary material for: Achieving Net Zero Carbon Dioxide by Sequestering Biomass Carbon
Source: Preprints.org preprint supplement (doi:10.20944/preprints202007.0576.v1), 2020-07-24
Supplement: Supplementary file 3 [file Supplementary-Tree Height - 2.xlsx]

## Sheet: TS6_Growth_coefficients
Region	Scientific Name	SpCode	Independent variable	Predicts component	Units of predicted components	Model weight	EqName	a	b	c	d	e	Apps min	Apps max	Sigma	n	adj R2	Data min (from raw data)	Data max (from raw data)	DF
CenFla	Acer rubrum	ACRU	dbh	age	years	1/dbh	lin	1.51618	0.41447				2	65	0.42975	54	0.876	2	48	52
CenFla	Acer rubrum	ACRU	cdia	dbh	meters	1	loglogw1	1.3118	3.00257	0.04744			2.34	96.61	0.21781	54	0.894	5.1	94.5	52
CenFla	Acer rubrum	ACRU	dbh	crown dia	meters	1/dbh	quad	0.72545	0.2537	-0.00123			1.31	13.75	0.04139	54	0.91	2.5	15.8	51
CenFla	Acer rubrum	ACRU	dbh	crown ht	meters	1/dbh	lin	2.73019	0.1214				3.01	14.46	0.14542	54	0.641	1	17	52
CenFla	Acer rubrum	ACRU	age	dbh	centimeters	1/sqrt(age)	quad	-3.6811	3.0548	-0.02326			2.34	96.61	22.6792	54	0.847	5.1	94.5	51
CenFla	Acer rubrum	ACRU	dbh	leaf area	sq. meters	1/dbh	quad	-8.35263	4.42208	0.03036			2.14	702.22	278.917	54	0.748	10.3	825.5	51
CenFla	Acer rubrum	ACRU	dbh	tree ht	meters	1/sqrt(dbh)	quad	2.15761	0.29592	-0.00158			2.84	16.03	0.78841	54	0.762	2.5	21.5	51
CenFla	Cinnamomum camphora	CICA	dbh	age	years	1/dbh	lin	1.69357	0.40906				1	95	0.78467	58	0.878	1	72	56
CenFla	Cinnamomum camphora	CICA	cdia	dbh	meters	1	loglogw1	1.55478	2.73094	0.10762			1.96	150.7	0.32806	63	0.842	4.8	150.6	61
CenFla	Cinnamomum camphora	CICA	dbh	crown dia	meters	1/dbh	quad	0.64978	0.2614	-0.00095			1.16	18.72	0.11378	63	0.878	1.5	23.8	60
CenFla	Cinnamomum camphora	CICA	dbh	crown ht	meters	1/sqrt(dbh)	cub	1.01405	0.26806	-0.00275	1e-05		1.53	13.59	0.74377	63	0.633	1	16	59
CenFla	Cinnamomum camphora	CICA	age	dbh	centimeters	1/age	quad	-0.87708	2.85059	-0.01321			1.96	150.7	8.4086	58	0.9	4.8	150.6	55
CenFla	Cinnamomum camphora	CICA	dbh	leaf area	sq. meters	1	loglogw1	-2.82649	6.13761	0.38432			0.27	1438.7	0.61993	57	0.803	1.3	1679.4	55
CenFla	Cinnamomum camphora	CICA	dbh	tree ht	meters	1	cub	2.53889	0.34177	-0.00365	1e-05		3.19	18.22	7.71877	63	0.536	2	18.5	59
CenFla	Eriobotrya japonica	ERJA	dbh	age	years	1/dbh	lin	2.45205	0.38214				1	30	0.66744	30	0.637	2	23	28
CenFla	Eriobotrya japonica	ERJA	cdia	dbh	meters	1	loglogw1	1.5042	2.39219	0.06057			3.5	54.87	0.24612	30	0.892	1.5	43	28
CenFla	Eriobotrya japonica	ERJA	dbh	crown dia	meters	1/dbh	lin	0.83558	0.22941				1.23	13.42	0.04597	30	0.903	1	10	28
CenFla	Eriobotrya japonica	ERJA	dbh	crown ht	meters	1/dbh	lin	0.47577	0.14851				0.73	8.63	0.05376	30	0.768	0.5	9	28
CenFla	Eriobotrya japonica	ERJA	age	dbh	centimeters	1/age	lin	1.72609	1.77157				1.73	54.87	5.60377	30	0.609	1.5	43	28
CenFla	Eriobotrya japonica	ERJA	dbh	leaf area	sq. meters	1	loglogw1	-3.07252	6.13881	0.22352			0.88	281.8	0.47278	26	0.941	0.1	206.2	24
CenFla	Eriobotrya japonica	ERJA	dbh	tree ht	meters	1/dbh	quad	1.15555	0.28024	-0.00266			1.63	8.54	0.05599	30	0.838	1.5	11	27
CenFla	Juniperus virginiana var. silicicola	JUSI	dbh	age	years	1	loglogw1	-0.28355	2.65266	0.08125			2	44	0.28504	48	0.857	2	94	46
CenFla	Juniperus virginiana var. silicicola	JUSI	cdia	dbh	meters	1/cdia^2	quad	0.97463	3.30955	0.23423			2.71	80.53	3.03215	50	0.865	2.8	100.1	47
CenFla	Juniperus virginiana var. silicicola	JUSI	dbh	crown dia	meters	1/sqrt(dbh)	quad	0.46627	0.25589	-0.00147			0.73	11.56	0.29839	50	0.884	0.5	14.5	47
CenFla	Juniperus virginiana var. silicicola	JUSI	dbh	crown ht	meters	1	quad	1.54184	0.18679	-0.00117			1.73	9.01	2.57001	50	0.647	1	12.5	47
CenFla	Juniperus virginiana var. silicicola	JUSI	age	dbh	centimeters	1/age	cub	-0.6109	1.63311	0.0145	-0.00022		1.04	80.53	3.59068	48	0.905	2.8	100.1	44
CenFla	Juniperus virginiana var. silicicola	JUSI	dbh	leaf area	sq. meters	1	loglogw1	-2.58187	5.7126	0.33825			0.71	422.63	0.58159	46	0.856	0.1	849.8	44
CenFla	Juniperus virginiana var. silicicola	JUSI	dbh	tree ht	meters	1/sqrt(dbh)	quad	1.94014	0.25408	-0.00159			2.2	12.1	0.50324	50	0.792	1.5	15	47
CenFla	Koelreuteria elegans	KOELFO	dbh	age	years	1/dbh^2	quad	2.22523	0.25901	0.00364			0	46	0.0231	40	0.801	3	50	37
CenFla	Koelreuteria elegans	KOELFO	cdia	dbh	meters	1	loglogw1	1.08173	2.98561	0.06491			1.55	63.37	0.25478	41	0.867	4.8	69.6	39
CenFla	Koelreuteria elegans	KOELFO	dbh	crown dia	meters	1/dbh	lin	1.91565	0.19718				2.22	14.41	0.07759	41	0.874	2.3	17.8	39
CenFla	Koelreuteria elegans	KOELFO	dbh	crown ht	meters	1	lin	2.28049	0.10226				2.44	8.76	1.89243	41	0.652	1.5	11	39
CenFla	Koelreuteria elegans	KOELFO	age	dbh	centimeters	1	quad	1.54502	2.71251	-0.02975			1.55	63.37	66.0984	40	0.804	4.8	69.6	37
CenFla	Koelreuteria elegans	KOELFO	dbh	leaf area	sq. meters	1/dbh^2	quad	6.4534	0.20579	0.10299			7.02	433.08	5.01046	39	0.756	1.2	813.4	36
CenFla	Koelreuteria elegans	KOELFO	dbh	tree ht	meters	1	lin	4.44294	0.11553				4.62	11.76	2.9371	41	0.606	3	13.5	39
CenFla	Lagerstroemia indica	LAIN	dbh	age	years	1/dbh	lin	2.13037	0.34447				0	30	0.42746	34	0.726	3	30	32
CenFla	Lagerstroemia indica	LAIN	cdia	dbh	meters	1/sqrt(cdia)	lin	2.08409	5.16307				5.71	64.39	47.9255	35	0.582	4.1	60.7	33
CenFla	Lagerstroemia indica	LAIN	dbh	crown dia	meters	1/sqrt(dbh)	lin	1.84312	0.11695				2.51	9.37	0.47249	35	0.596	1.5	9.5	33
CenFla	Lagerstroemia indica	LAIN	dbh	crown ht	meters	1/sqrt(dbh)	lin	1.28193	0.07279				1.7	5.97	0.39619	35	0.4	0.5	8.5	33
CenFla	Lagerstroemia indica	LAIN	age	dbh	centimeters	1	lin	5.70526	1.95628				5.71	64.39	65.5992	34	0.714	4.1	60.7	32
CenFla	Lagerstroemia indica	LAIN	dbh	leaf area	sq. meters	1	loglogw1	-2.64729	5.23174	1.00334			6.98	227.96	1.00167	34	0.586	0.9	291.6	32
CenFla	Lagerstroemia indica	LAIN	dbh	tree ht	meters	1/sqrt(dbh)	lin	2.40476	0.10047				2.98	8.87	0.70561	35	0.417	1.5	13.5	33
CenFla	Liquidambar styraciflua	LIST	dbh	age	years	1/dbh^2	cub	0.83572	0.50777	-0.00382	7e-05		2	70	0.01046	48	0.945	3	59	44
CenFla	Liquidambar styraciflua	LIST	cdia	dbh	meters	1	loglogw1	1.6463	2.49347	0.03465			2.8	99.73	0.18615	48	0.942	2.3	93.2	46
CenFla	Liquidambar styraciflua	LIST	dbh	crown dia	meters	1/dbh^2	quad	0.45464	0.24185	-0.00054			0.67	19.14	0.00142	48	0.955	1	21.5	45
CenFla	Liquidambar styraciflua	LIST	dbh	crown ht	meters	1/dbh	quad	1.11401	0.30842	-0.00196			1.38	13.26	0.13414	48	0.819	2	19	45
CenFla	Liquidambar styraciflua	LIST	age	dbh	centimeters	1	loglogw1	0.76105	2.6362	0.03839			0.88	99	0.19595	48	0.936	2.3	93.2	46
CenFla	Liquidambar styraciflua	LIST	dbh	leaf area	sq. meters	1	loglogw1	-2.1608	5.76918	0.28756			1.18	903.14	0.53625	48	0.878	0.5	1778.8	46
CenFla	Liquidambar styraciflua	LIST	dbh	tree ht	meters	1	loglogw1	0.19747	1.82322	0.04927			0.56	19.92	0.22196	48	0.806	2.5	25	46
CenFla	Magnolia grandiflora	MAGR	dbh	age	years	1/dbh^2	lin	0.94672	0.49478				2	70	0.0134	51	0.897	3	71	49
CenFla	Magnolia grandiflora	MAGR	cdia	dbh	meters	1	loglogw1	2.07021	2.11624	0.0653			3.04	105.47	0.25554	51	0.896	6.6	104.9	49
CenFla	Magnolia grandiflora	MAGR	dbh	crown dia	meters	1/dbh^2	quad	-0.49155	0.28788	-0.0013			0.37	15.41	0.00133	51	0.935	1	17.8	48
CenFla	Magnolia grandiflora	MAGR	dbh	crown ht	meters	1/sqrt(dbh)	loglogw2	-1.12316	2.38565	0.01614			0.73	13.31	0.12704	50	0.821	1.5	17.4	48
CenFla	Magnolia grandiflora	MAGR	age	dbh	centimeters	1/age	quad	-1.74323	2.41888	-0.01267			3.04	105.47	3.31702	51	0.913	6.6	104.9	48
CenFla	Magnolia grandiflora	MAGR	dbh	leaf area	sq. meters	1	loglogw1	-4.46234	7.36133	0.30728			1.97	1143.53	0.55433	49	0.9	0.6	1248.6	47
CenFla	Magnolia grandiflora	MAGR	dbh	tree ht	meters	1/sqrt(dbh)	loglogw2	-0.7045	2.27295	0.00978			1.07	16.51	0.09892	49	0.873	2	20.4	47
CenFla	Pinus elliottii	PIEL	dbh	age	years	1	expow1	1.7814	0.02715	0.09285			2	50	0.30471	34	0.712	5	40	32
CenFla	Pinus elliottii	PIEL	cdia	dbh	meters	1	loglogw1	1.8026	2.32236	0.04338			1.79	89.54	0.20827	37	0.908	5.3	64.8	35
CenFla	Pinus elliottii	PIEL	dbh	crown dia	meters	1/dbh	loglogw3	-1.20695	2.52258	0.00112			0.38	13.9	0.03354	37	0.945	1.5	16.3	35
CenFla	Pinus elliottii	PIEL	dbh	crown ht	meters	1/dbh^2	lin	2.47201	0.14372				2.76	15.16	0.00604	37	0.574	1.5	14	35
CenFla	Pinus elliottii	PIEL	age	dbh	centimeters	1	loglogw1	0.23241	3.06738	0.12536			2	88.28	0.35406	34	0.749	5.3	64.8	32
CenFla	Pinus elliottii	PIEL	dbh	leaf area	sq. meters	1/sqrt(dbh)	loglogw2	-0.94576	4.31015	0.07001			0.61	268.62	0.26459	36	0.763	4.8	476.2	34
CenFla	Pinus elliottii	PIEL	dbh	tree ht	meters	1/sqrt(dbh)	loglogw2	0.01055	1.98831	0.01017			1.22	20.25	0.10083	37	0.826	3.5	27.5	35
CenFla	Platanus occidentalis	PLOC	dbh	age	years	1/sqrt(dbh)	lin	3.88583	0.4345				3	50	3.07173	40	0.831	5	41	38
CenFla	Platanus occidentalis	PLOC	cdia	dbh	meters	1/cdia^2	cub	6.02993	0.07869	0.39112	-0.01085		4.64	94.64	0.24729	44	0.956	6.4	79.5	40
CenFla	Platanus occidentalis	PLOC	dbh	crown dia	meters	1/dbh	cub	-1.86335	0.59419	-0.00937	7e-05		0.7	28.17	0.0405	44	0.948	1.3	20.8	40
CenFla	Platanus occidentalis	PLOC	dbh	crown ht	meters	1/dbh	quad	1.43205	0.30088	-0.00129			2.24	18.34	0.12467	44	0.817	3.5	20	41
CenFla	Platanus occidentalis	PLOC	age	dbh	centimeters	1/age	lin	-1.10175	1.91487				2.73	94.64	3.87399	40	0.841	6.4	79.5	38
CenFla	Platanus occidentalis	PLOC	dbh	leaf area	sq. meters	1	loglogw1	-3.09071	6.87013	0.28567			0.61	1783.47	0.53448	44	0.865	2.4	3857.5	42
CenFla	Platanus occidentalis	PLOC	dbh	tree ht	meters	1/dbh	quad	2.68429	0.39025	-0.002			3.73	21.69	0.12038	44	0.868	5.5	24.2	41
CenFla	Prunus caroliniana	PRCA	dbh	age	years	1/dbh	lin	1.36173	0.31699				1	40	0.27701	38	0.816	3	27	36
CenFla	Prunus caroliniana	PRCA	cdia	dbh	meters	1	loglogw1	0.96027	3.12376	0.07301			0.9	72.04	0.27021	38	0.865	4.4	78.5	36
CenFla	Prunus caroliniana	PRCA	dbh	crown dia	meters	1	loglogw1	-0.22301	1.87894	0.02668			0.36	12.42	0.16333	38	0.885	2	13.5	36
CenFla	Prunus caroliniana	PRCA	dbh	crown ht	meters	1/sqrt(dbh)	loglogw2	0.12008	1.3873	0.02938			0.62	8.78	0.17141	38	0.514	1.5	15	36
CenFla	Prunus caroliniana	PRCA	age	dbh	centimeters	1/age	quad	-2.76632	3.70913	-0.04597			0.9	72.04	6.02185	38	0.81	4.4	78.5	35
CenFla	Prunus caroliniana	PRCA	dbh	leaf area	sq. meters	1/sqrt(dbh)	loglogw2	0.54925	3.49228	0.06839			0.38	297.07	0.26152	33	0.664	14.2	542.6	31
CenFla	Prunus caroliniana	PRCA	dbh	tree ht	meters	1	loglogw1	0.67059	1.23799	0.04722			1.18	11.95	0.21729	38	0.65	2.5	17	36
CenFla	Quercus laurifolia	QULA2	dbh	age	years	1/dbh	lin	2.09173	0.44502				2	61	0.28955	61	0.948	4	65	59
CenFla	Quercus laurifolia	QULA2	cdia	dbh	meters	1	loglogw1	0.80733	3.2725	0.04841			3.98		0.22002	66	0.924	6.4	164.8	64
CenFla	Quercus laurifolia	QULA2	dbh	crown dia	meters	1/dbh	quad	1.3849	0.27308	-0.0008			1.74	22.05	0.05953	66	0.943	2	27.3	63
CenFla	Quercus laurifolia	QULA2	dbh	crown ht	meters	1/dbh	quad	2.06477	0.20305	-0.00077			2.33	15.13	0.10889	65	0.793	2.5	19	62
CenFla	Quercus laurifolia	QULA2	age	dbh	centimeters	1/age^2	cub	1.30621	1.23988	0.04912	-0.00065		1.31	112.84	0.11319	61	0.947	6.4	164.8	57
CenFla	Quercus laurifolia	QULA2	dbh	leaf area	sq. meters	1/dbh^2	quad	-19.8903	5.38292	0.05506			2.39	1288.53	13.3328	63	0.794	6.3	1753.9	60
CenFla	Quercus laurifolia	QULA2	dbh	tree ht	meters	1/dbh	quad	3.2063	0.26792	-0.00106			3.55	19.97	0.09443	65	0.881	4.5	23.5	62
CenFla	Quercus shumardii	QUSH	dbh	age	years	1	loglogw1	-1.01529	3.03175	0.03809			0	33	0.19517	37	0.925	1	33	35
CenFla	Quercus shumardii	QUSH	cdia	dbh	meters	1/cdia^2	quad	2.57347	2.0877	0.10028			2.54	77.35	0.33746	37	0.929	5.3	76.7	34
CenFla	Quercus shumardii	QUSH	dbh	crown dia	meters	1/dbh	quad	0.01907	0.35303	-0.00164			0.91	17.49	0.04592	37	0.942	1.3	19.8	34
CenFla	Quercus shumardii	QUSH	dbh	crown ht	meters	1/dbh	quad	0.03125	0.35009	-0.00206			0.91	14.79	0.06063	37	0.909	2	16	34
CenFla	Quercus shumardii	QUSH	age	dbh	centimeters	1/age^2	quad	2.54333	1.42769	0.02543			2.54	77.35	0.15598	37	0.918	5.3	76.7	34
CenFla	Quercus shumardii	QUSH	dbh	leaf area	sq. meters	1/dbh^2	cub	12.6475	-4.50491	0.53834	-0.00436		4.6	866.05	2.48582	34	0.953	2.3	914	30
CenFla	Quercus shumardii	QUSH	dbh	tree ht	meters	1/dbh	quad	0.87251	0.43255	-0.00281			1.95	17.53	0.06963	37	0.923	3	19	34
CenFla	Quercus virginiana	QUVI	dbh	age	years	1/dbh	cub	5.10283	0.14291	0.00458	-2e-05		3	95	0.44519	61	0.928	5	83	57
CenFla	Quercus virginiana	QUVI	cdia	dbh	meters	1/cdia^2	quad	0.47336	2.79751	0.07259			2.1	194.32	0.53679	64	0.936	7.1	185.7	61
CenFla	Quercus virginiana	QUVI	dbh	crown dia	meters	1	loglogw1	-1.33981	2.89148	0.02035			0.38	32.27	0.14264	64	0.95	2.5	31.5	62
CenFla	Quercus virginiana	QUVI	dbh	crown ht	meters	1/dbh	quad	1.70662	0.16442	-0.00039			2.05	18.77	0.08466	64	0.825	2.5	22.5	61
CenFla	Quercus virginiana	QUVI	age	dbh	centimeters	1/age	cub	-7.62777	3.34615	-0.03523	0.00024		2.1	194.32	3.76635	61	0.933	7.1	185.7	57
CenFla	Quercus virginiana	QUVI	dbh	leaf area	sq. meters	1	loglogw1	-2.90328	6.55717	0.20319			0.22	3317.24	0.45077	63	0.907	12.8	2575.3	61
CenFla	Quercus virginiana	QUVI	dbh	tree ht	meters	1/dbh	quad	2.47969	0.23417	-0.00069			2.97	22.28	0.06865	64	0.908	4	24.2	61
CenFla	Sabal palmetto	SAPA	dbh	crown dia	meters	1	cub	-0.10386	1.79504	-0.21194	0.00741		1.84	4.65	0.44262	41	0.479	1.8	5.8	37
CenFla	Sabal palmetto	SAPA	dbh	crown ht	meters	1/sqrt(ht)	quad	0.37206	0.50791	-0.02009			0.98	3.37	0.16693	41	0.568	0.5	4	38
CenFla	Sabal palmetto	SAPA	dbh	leaf area	sq. meters	1/sqrt(ht)	quad	0	4.57886	0.22546			6.15	43.38				2.9	50.2
CenFla	Sabal palmetto	SAPA	dbh	tree ht	meters	1	cub	-2.33853	1.38787	-0.06501	0.00093		1.27	9.42	5.08306	41	0.362	1	15	37
CenFla	Syagrus romanzoffiana	SYRO	dbh	crown dia	meters	1/ht	lin	1.33474	0.56526				1.56	7.33	0.12112	28	0.867	1.5	9.8	26
CenFla	Syagrus romanzoffiana	SYRO	dbh	crown ht	meters	1/ht^2	lin	0.05708	0.51392				0.26	5.07	0.0311	28	0.784	0.5	6.5	26
CenFla	Syagrus romanzoffiana	SYRO	dbh	leaf area	sq. meters	1/sqrt(ht)	cub	0	1.81585	0.40067	-0.00902		0.78	53.55				0.5	58.8
CenFla	Syagrus romanzoffiana	SYRO	dbh	tree ht	meters	1	loglogw1	-0.30104	2.37416	0.14649			0.39	13.57	0.38274	28	0.734	1	14	26
CenFla	Platycladus orientalis	THOR	dbh	age	years	1/dbh^2	lin	1.06016	0.38973				2	30	0.02669	34	0.669	3	28	32
CenFla	Platycladus orientalis	THOR	cdia	dbh	meters	1/cdia	quad	-2.07665	9.28926	-0.34644			3.7	54.3	6.20141	36	0.909	4.3	53.1	33
CenFla	Platycladus orientalis	THOR	dbh	crown dia	meters	1/dbh	lin	0.26951	0.13335				0.76	7.51	0.01902	36	0.906	0.8	9	34
CenFla	Platycladus orientalis	THOR	dbh	crown ht	meters	1/sqrt(dbh)	loglogw2	-0.91993	1.65196	0.02136			0.84	4.28	0.14616	36	0.648	1	6.5	34
CenFla	Platycladus orientalis	THOR	age	dbh	centimeters	1	cub	-9.74097	7.50867	-0.4091	0.00767		3.7	54.3	68.264	34	0.517	4.3	53.1	30
CenFla	Platycladus orientalis	THOR	dbh	leaf area	sq. meters	1	loglogw1	-5.81911	7.60722	0.29424			0.16	135.44	0.54244	36	0.902	0.3	195.6	34
CenFla	Platycladus orientalis	THOR	dbh	tree ht	meters	1	loglogw1	-0.60296	1.67832	0.06917			1.18	5.72	0.26301	36	0.654	1.5	8.4	34
CenFla	Triadica sebifera	TRSE6	dbh	age	years	1/sqrt(dbh)	cub	8.55199	-0.36659	0.02053	-0.00015		0	40	2.04881	38	0.839	3	35	34
CenFla	Triadica sebifera	TRSE6	cdia	dbh	meters	1	loglogw1	1.23973	2.92168	0.07866			2.6	82.54	0.28046	40	0.887	1.5	82.3	38
CenFla	Triadica sebifera	TRSE6	dbh	crown dia	meters	1/dbh	cub	0.48345	0.36843	-0.00543	4e-05		1.4	14.07	0.05965	40	0.896	1	16	36
CenFla	Triadica sebifera	TRSE6	dbh	crown ht	meters	1	lin	2.9358	0.09961				3.19	11.16	4.197	40	0.472	0.5	12	38
CenFla	Triadica sebifera	TRSE6	age	dbh	centimeters	1	lin	2.59625	1.99853				2.6	82.54	58.8689	38	0.842	1.5	82.3	36
CenFla	Triadica sebifera	TRSE6	dbh	leaf area	sq. meters	1	loglogw1	-1.85053	5.42429	0.35913			1.22	604.48	0.59927	39	0.876	0	796.5	37
CenFla	Triadica sebifera	TRSE6	dbh	tree ht	meters	1	lin	4.07849	0.13477				4.43	15.2	4.11689	40	0.628	1.5	15.5	38
CenFla	Ulmus parvifolia	ULPA	dbh	age	years	1	loglogw1	-0.2268	2.63922	0.06842			4	70	0.26157	33	0.808	4	41	31
CenFla	Ulmus parvifolia	ULPA	cdia	dbh	meters	1/cdia	quad	2.60921	1.70164	0.06206			5.53	66.28	1.57969	37	0.937	5.3	66.2	34
CenFla	Ulmus parvifolia	ULPA	dbh	crown dia	meters	1	quad	0.1779	0.42868	-0.00191			0.45	20.03	1.50949	37	0.938	2.3	19.5	34
CenFla	Ulmus parvifolia	ULPA	dbh	crown ht	meters	1/sqrt(dbh)	lin	1.78091	0.14688				1.88	11.49	0.37386	37	0.733	1.5	11.5	35
CenFla	Ulmus parvifolia	ULPA	age	dbh	centimeters	1/age	loglogw3	0.493515	2.55067	0.00433424			0.64	76.97	72.9073	36	0.883	5.3	66.2	32
CenFla	Ulmus parvifolia	ULPA	dbh	leaf area	sq. meters	1/dbh^2	quad	-18.338	3.56472	0.16204			6.5	925.47	7.97861	36	0.845	5.3	852.1	33
CenFla	Ulmus parvifolia	ULPA	dbh	tree ht	meters	1	quad	1.76861	0.33916	-0.0027			1.99	12.43	2.03976	37	0.772	3	14	34
CenFla	Washingtonia robusta	WARO	dbh	crown dia	meters	1/sqrt(ht)	quad	0.62988	0.74994	-0.03784			1.19	4.13	0.19782	38	0.696	0.5	5.5	35
CenFla	Washingtonia robusta	WARO	dbh	crown ht	meters	1/ht^2	quad	-0.15504	0.777	-0.04277			0.42	3.04	0.00622	38	0.854	0.5	4.5	35
CenFla	Washingtonia robusta	WARO	dbh	leaf area	sq. meters	1/sqrt(ht)	quad	0	1.48596	0.19128			1.27	46.54				1.6	41
CenFla	Washingtonia robusta	WARO	dbh	tree ht	meters	1/sqrt(age)	quad	-1.0862	0.96546	-0.01645			0.78	13.07	3.05159	38	0.591	1	16	35
GulfCo	Acer rubrum	ACRU	dbh	age	years	1/dbh^2	cub	-2.86707	1.34968	-0.03824	0.0004		1	38	0.03047	36	0.84	0	40	32
GulfCo	Acer rubrum	ACRU	cdia	dbh	meters	1/cdia^2	quad	1.34377	2.24225	0.13183			4.31	70.34	0.56985	36	0.922	2.5	68.6	33
GulfCo	Acer rubrum	ACRU	dbh	crown dia	meters	1	loglogw1	-0.95104	2.50944	0.03775			0.72	14.9	0.19429	36	0.914	0.6	15.9	34
GulfCo	Acer rubrum	ACRU	dbh	crown ht	meters	1	loglogw1	-0.38867	2.17532	0.0546			1.18	16.15	0.23367	36	0.847	0.8	15	34
GulfCo	Acer rubrum	ACRU	age	dbh	centimeters	1/age	lin	2.52944	1.78455				2.53	70.34	6.99627	36	0.85	2.5	68.6	34
GulfCo	Acer rubrum	ACRU	dbh	leaf area	sq. meters	1/dbh^2	quad	1.50836	-0.53033	0.09893			0.8	453.72	0.48743	33	0.922	0.2	435.9	30
GulfCo	Acer rubrum	ACRU	dbh	tree ht	meters	1/dbh	quad	1.46853	0.46904	-0.00359			2.63	16.77	0.15352	36	0.847	2	19	33
GulfCo	Butia capitata	BUCA	dbh	crown dia	meters	1/ht^2	cub	-0.0575	0.10884	1.87801	-0.45639		0.12	4.63				0.7	7.4
GulfCo	Butia capitata	BUCA	dbh	crown ht	meters	1/ht	cub	0.05266	0.60196	0.26754	-0.05015		0.1	3.61				0.5	6
GulfCo	Butia capitata	BUCA	dbh	leaf area	sq. meters	1/ht^2	cub	1.61891	-9.39589	14.7527	-2.5439		1.42	40.39
GulfCo	Butia capitata	BUCA	dbh	tree ht	meters	1/sqrt(dbh)	cub	0.06875	0.21904	-0.00266	1e-05		0.07	6.19				1.5	8.5
GulfCo	Carya illinoinensis	CAIL	dbh	age	years	1/dbh^2	quad	-2.3867	1.00638	-0.0041			1	70	0.02354	36	0.948	0	60	33
GulfCo	Carya illinoinensis	CAIL	cdia	dbh	meters	1	lin	1.10501	3.62607				3.79	1295.7	121.385	36	0.705	2.5	90.9	34
GulfCo	Carya illinoinensis	CAIL	dbh	crown dia	meters	1/sqrt(dbh)	lin	2.5373	0.202324				3.05	20.87	1.07559	36	0.746	0.7	25.9	34
GulfCo	Carya illinoinensis	CAIL	dbh	crown ht	meters	1/sqrt(dbh)	loglogw2	-0.51305	2.28579	0.01293			1.03	19.99	0.11373	36	0.895	1	22.5	34
GulfCo	Carya illinoinensis	CAIL	age	dbh	centimeters	1/age^2	lin	2.52741	1.25824				2.53	90.6	0.09093	36	0.943	2.5	90.9	34
GulfCo	Carya illinoinensis	CAIL	dbh	leaf area	sq. meters	1/sqrt(dbh)	loglogw2	-7.12362	9.46524	0.03456			0.22	1501.18	0.03456	27	0.846	21.1	1512.8	25
GulfCo	Carya illinoinensis	CAIL	dbh	tree ht	meters	1	loglogw1	0.17767	1.92206	0.0509			1.94	21.91	0.22561	36	0.798	1.8	26	34
GulfCo	Celtis laevigata	CELA	dbh	age	years	1/dbh	quad	-1.52508	0.81167	-0.00312			0	41	1.23315	37	0.85	0	50	34
GulfCo	Celtis laevigata	CELA	cdia	dbh	meters	1/cdia^2	lin	0.15848	4.28057				3.04	64.74	1.70434	37	0.869	3	103.6	35
GulfCo	Celtis laevigata	CELA	dbh	crown dia	meters	1/dbh^2	cub	-0.8392	0.50231	-0.007	4e-05		0.62	12.5	0.00601	37	0.856	0.8	19	33
GulfCo	Celtis laevigata	CELA	dbh	crown ht	meters	1	lin	3.63189	0.09914				3.93	10.05	4.31704	36	0.539	0.5	13	34
GulfCo	Celtis laevigata	CELA	age	dbh	centimeters	1/age^2	cub	3.03874	0.92424	0.06529	-0.00125		3.04	64.74	0.21129	37	0.909	3	103.6	33
GulfCo	Celtis laevigata	CELA	dbh	leaf area	sq. meters	1	loglogw1	-5.55956	7.7096	1.58174			1.6	660.72	1.25767	28	0.63	0	653.2	26
GulfCo	Celtis laevigata	CELA	dbh	tree ht	meters	1	cub	1.19032	0.50228	-0.00826	5e-05		2.64	12.01	5.89407	37	0.571	1	16.5	33
GulfCo	Cornus florida	COFL	dbh	age	years	1/dbh^2	lin	-0.67522	1.02936				1	51	0.10846	34	0.749	3	45	32
GulfCo	Cornus florida	COFL	cdia	dbh	meters	1	loglogw1	1.71264	1.92446	0.10013			1.39	35.34	0.31643	34	0.617	3.8	47.5	32
GulfCo	Cornus florida	COFL	dbh	crown dia	meters	1/sqrt(dbh)	quad	0.21538	0.41554	-0.00536			0.82	8.17	0.36191	34	0.652	1.3	11.1	31
GulfCo	Cornus florida	COFL	dbh	crown ht	meters	1	quad	0.73087	0.28223	-0.00391			1.14	5.82	2.05648	33	0.281	0.5	8.5	30
GulfCo	Cornus florida	COFL	age	dbh	centimeters	1	loglogw1	0.96778	1.85836	0.08767			1.49	34.53	0.29609	34	0.665	3.8	47.5	32
GulfCo	Cornus florida	COFL	dbh	leaf area	sq. meters	1	loglogw1	-5.57391	6.74063	1.57914			0.14	77.57	1.25664	28	0.504	0	95	26
GulfCo	Cornus florida	COFL	dbh	tree ht	meters	1	quad	2.25488	0.31929	-0.00442			2.72	8.01	2.29861	33	0.314	2.5	10	30
GulfCo	Gleditsia triacanthos	GLTR	dbh	age	years	1/sqrt(dbh)	cub	-8.04986	3.20237	-0.15081	0.00259		1	47	6.14296	37	0.716	0	40	33
GulfCo	Gleditsia triacanthos	GLTR	cdia	dbh	meters	1/cdia^2	lin	0.01705	2.73407				3.88	34.54	0.38533	37	0.909	2.5	39.4	35
GulfCo	Gleditsia triacanthos	GLTR	dbh	crown dia	meters	1	loglogw1	-0.53985	2.30832	0.03039			1.02	11.11	0.17432	37	0.89	0.9	13.2	35
GulfCo	Gleditsia triacanthos	GLTR	dbh	crown ht	meters	1	loglogw1	-0.82873	2.24561	0.06936			0.78	7.78	0.26337	36	0.774	0.7	9.5	34
GulfCo	Gleditsia triacanthos	GLTR	age	dbh	centimeters	1/age^2	quad	2.52626	1.37056	-0.01467			2.53	34.54	0.12403	37	0.9	2.5	39.4	34
GulfCo	Gleditsia triacanthos	GLTR	dbh	leaf area	sq. meters	1	expow1	0.74144	0.10207	0.83082			4.12	108.03	0.91149	33	0.44	2.6	154.9	31
GulfCo	Gleditsia triacanthos	GLTR	dbh	tree ht	meters	1	loglogw1	0.05139	1.78587	0.04928			1.65	10.35	0.22198	36	0.753	1.5	11.5	34
GulfCo	Ilex opaca	ILOP	dbh	age	years	1/dbh^2	cub	-7.63703	3.39474	-0.1696	0.00288		1	35	0.02205	37	0.95	0	40	33
GulfCo	Ilex opaca	ILOP	cdia	dbh	meters	1	loglogw1	1.90024	2.00291	0.03392			2.7	40.14	0.18418	37	0.912	2.5	39.6	35
GulfCo	Ilex opaca	ILOP	dbh	crown dia	meters	1/dbh^2	quad	0.07202	0.28414	-0.00229			0.78	7.79	0.00127	37	0.944	0.8	9.5	34
GulfCo	Ilex opaca	ILOP	dbh	crown ht	meters	1	loglogw1	-0.77752	2.29877	0.05786			0.83	9.57	0.24054	36	0.83	0.8	12	34
GulfCo	Ilex opaca	ILOP	age	dbh	centimeters	1/age^2	cub	2.53924	0.07682	0.08877	-0.00172		2.54	40.14	0.06408	37	0.933	2.5	39.6	33
GulfCo	Ilex opaca	ILOP	dbh	leaf area	sq. meters	1	loglogw1	-7.00874	8.2918	0.53597			0.11	86.04	0.7321	27	0.774	0.3	90.2	25
GulfCo	Ilex opaca	ILOP	dbh	tree ht	meters	1	loglogw1	-0.07365	1.89671	0.06102			1.52	11.38	0.24703	37	0.755	1.6	15	35
GulfCo	Juniperus virginiana	JUVI	dbh	age	years	1	lin	12.9222	0.41075				1	55	50.6859	43	0.58	0	60	41
GulfCo	Juniperus virginiana	JUVI	cdia	dbh	meters	1	loglogw1	1.72093	2.67191	0.08593			3.32	84.3	0.29314	43	0.869	2.5	81.3	41
GulfCo	Juniperus virginiana	JUVI	dbh	crown dia	meters	1	loglogw1	-0.634	1.9623	0.05261			0.87	10.03	0.22938	43	0.841	1	13.1	41
GulfCo	Juniperus virginiana	JUVI	dbh	crown ht	meters	1	cub	0.55035	0.47302	-0.01036	7e-05		1.68	8.32	3.14142	43	0.349	1.5	11.5	39
GulfCo	Juniperus virginiana	JUVI	age	dbh	centimeters	1/age^2	quad	2.53228	0.77567	0.01293			2.53	84.3	0.26005	43	0.822	2.5	81.3	40
GulfCo	Juniperus virginiana	JUVI	dbh	leaf area	sq. meters	1	loglogw1	-5.52175	7.08015	0.49953			0.18	202.16	0.70677	37	0.761	0.3	199.8	35
GulfCo	Juniperus virginiana	JUVI	dbh	tree ht	meters	1	cub	-0.3202	0.5955	-0.01222	8e-05		1.11	13.14	3.24355	43	0.623	1.5	14	39
GulfCo	Lagerstroemia indica	LAIN	dbh	age	years	1/dbh	lin	0.43843	0.7043				0	50	1.97798	42	0.752	0	50	40
GulfCo	Lagerstroemia indica	LAIN	cdia	dbh	meters	1	loglogw1	1.74834	2.3726	0.16653			3.85	62.52	0.40808	42	0.698	2.5	76.6	40
GulfCo	Lagerstroemia indica	LAIN	dbh	crown dia	meters	1/dbh^2	cub	0.0129	0.43959	-0.00933	7e-05		1.57	7.4	0.0037	42	0.765	0.9	8.8	38
GulfCo	Lagerstroemia indica	LAIN	dbh	crown ht	meters	1/dbh	quad	0.61728	0.20646	-0.00182			1.39	6.47	0.07953	42	0.676	0.5	9	39
GulfCo	Lagerstroemia indica	LAIN	age	dbh	centimeters	1/sqrt(age)	lin	3.85142	1.17328				3.85	62.52	22.5011	42	0.809	2.5	76.6	40
GulfCo	Lagerstroemia indica	LAIN	dbh	leaf area	sq. meters	1	loglogw1	-3.81587	4.94589	1.44183			1.36	55.49	1.20076	39	0.485	0.1	78	37
GulfCo	Lagerstroemia indica	LAIN	dbh	tree ht	meters	1	loglogw1	0.21722	1.42863	0.03232			2.42	9.55	0.17978	40	0.813	2	12	38
GulfCo	Liquidambar styraciflua	LIST	dbh	age	years	1/dbh^2	cub	-2.93253	1.10541	-0.01942	0.00016		1	69	0.03008	50	0.873	0	70	46
GulfCo	Liquidambar styraciflua	LIST	cdia	dbh	meters	1	loglogw1	1.77607	2.43851	0.06647			4.94	84.26	0.25782	50	0.92	2.5	97.5	48
GulfCo	Liquidambar styraciflua	LIST	dbh	crown dia	meters	1/dbh^2	quad	0.34323	0.24821	-0.00095			0.98	14.49	0.00181	50	0.928	1	19.7	47
GulfCo	Liquidambar styraciflua	LIST	dbh	crown ht	meters	1/dbh^2	quad	0.00785	0.51171	-0.00336			1.32	19.47	0.00624	50	0.916	1.4	25	47
GulfCo	Liquidambar styraciflua	LIST	age	dbh	centimeters	1/sqrt(age)	quad	2.60246	2.35752	-0.01702			2.6	84.26	30.3062	50	0.891	2.5	97.5	47
GulfCo	Liquidambar styraciflua	LIST	dbh	leaf area	sq. meters	1/dbh	loglogw3	-7.06568	9.05533	0.01204			0.16	1044.6	0.10972	36	0.962	0.4	2098.4	34
GulfCo	Liquidambar styraciflua	LIST	dbh	tree ht	meters	1	loglogw1	0.04347	2.11814	0.03281			1.81	24.81	0.18113	50	0.924	2.1	29	48
GulfCo	Magnolia grandiflora	MAGR	dbh	age	years	1/dbh	quad	-2.77124	1.18279	-0.00736			0	53	1.4509	40	0.839	0	50	37
GulfCo	Magnolia grandiflora	MAGR	cdia	dbh	meters	1/cdia^2	lin	-0.50656	4.70742				2.55	67.11	1.52186	40	0.897	2.5	92.7	38
GulfCo	Magnolia grandiflora	MAGR	dbh	crown dia	meters	1	loglogw1	-1.14393	2.50577	0.03447			0.6	11.88	0.18567	40	0.906	0.6	13.4	38
GulfCo	Magnolia grandiflora	MAGR	dbh	crown ht	meters	1	loglogw1	-0.78544	2.26553	0.06683			0.83	12.12	0.25852	39	0.798	0.8	15.5	37
GulfCo	Magnolia grandiflora	MAGR	age	dbh	centimeters	1/age	lin	2.5468	1.21823				2.55	67.11	4.94706	40	0.886	2.5	92.7	38
GulfCo	Magnolia grandiflora	MAGR	dbh	leaf area	sq. meters	1	loglogw1	-6.85682	8.6079	0.52578			0.19	428.19	0.72511	36	0.786	1.3	594.5	34
GulfCo	Magnolia grandiflora	MAGR	dbh	tree ht	meters	1/dbh	quad	0.13915	0.42084	-0.00314			1.19	14.24	0.1233	39	0.863	1.2	18	36
GulfCo	Pinus taeda	PITA	dbh	age	years	1/dbh^2	cub	-5.3863	2.23449	-0.05488	0.00044		0	117	0.02724	47	0.935	0	100	43
GulfCo	Pinus taeda	PITA	cdia	dbh	meters	1	loglogw1	1.67743	2.45521	0.05664			2.51	114.35	0.23798	47	0.904	2.5	100.3	45
GulfCo	Pinus taeda	PITA	dbh	crown dia	meters	1/dbh^2	quad	0.14258	0.29955	-0.00154			0.88	14.72	0.00146	47	0.956	0.9	20.5	44
GulfCo	Pinus taeda	PITA	dbh	crown ht	meters	1	loglogw1	-0.23365	2.11056	0.06542			1.35	21.51	0.25578	47	0.809	1.6	26.5	45
GulfCo	Pinus taeda	PITA	age	dbh	centimeters	1/age	quad	2.50889	1.77264	-0.00698			2.51	114.35	9.19162	47	0.867	2.5	100.3	44
GulfCo	Pinus taeda	PITA	dbh	leaf area	sq. meters	1/sqrt(dbh)	loglogw2	-7.08149	8.80319	0.08334			0.33	1184.46	0.28869	34	0.779	3.3	2649	32
GulfCo	Pinus taeda	PITA	dbh	tree ht	meters	1	loglogw1	-0.09778	2.24377	0.0427			1.57	30.19	0.20663	47	0.88	1.6	31	45
GulfCo	Platanus occidentalis	PLOC	dbh	age	years	1/dbh	quad	-2.5238	0.91017	-0.00349			1	76	0.99628	56	0.904	0	60	53
GulfCo	Platanus occidentalis	PLOC	cdia	dbh	meters	1	loglogw1	1.1296	2.81441	0.09431			4.01	115.33	0.3071	55	0.873	2.5	104.1	53
GulfCo	Platanus occidentalis	PLOC	dbh	crown dia	meters	1/sqrt(dbh)	loglogw2	-0.50156	2.25529	0.0048			1.02	20.93	0.0693	55	0.961	1	21.9	53
GulfCo	Platanus occidentalis	PLOC	dbh	crown ht	meters	1	loglogw1	-0.37271	2.26841	0.02995			1.2	23.86	0.17305	56	0.928	1	25	54
GulfCo	Platanus occidentalis	PLOC	age	dbh	centimeters	1/age^2	lin	2.52516	1.48428				2.53	115.33	0.1531	56	0.933	2.5	104.1	54
GulfCo	Platanus occidentalis	PLOC	dbh	leaf area	sq. meters	1	loglogw1	-5.47914	8.38327	0.39623			0.6	2559.47	0.62947	47	0.9	0.7	2570.4	45
GulfCo	Platanus occidentalis	PLOC	dbh	tree ht	meters	1	loglogw1	0.22073	1.95818	0.01654			1.99	26.52	0.12859	55	0.946	1.8	26.5	53
GulfCo	Pyrus calleryana	PYCA	dbh	age	years	1/dbh	cub	-3.78255	1.39524	-0.02752	0.00021		0	40	0.79163	36	0.806	0	35	32
GulfCo	Pyrus calleryana	PYCA	cdia	dbh	meters	1/cdia	lin	-0.69862	3.82499				2.52	67.2	2.22963	35	0.946	2.5	72.4	33
GulfCo	Pyrus calleryana	PYCA	dbh	crown dia	meters	1/dbh	lin	0.51328	0.25097				1.15	17.38	0.04068	35	0.948	1	16.3	33
GulfCo	Pyrus calleryana	PYCA	dbh	crown ht	meters	1/dbh^2	quad	0.69438	0.25375	-0.00124			1.33	12.13	0.00252	35	0.906	1.3	16	32
GulfCo	Pyrus calleryana	PYCA	age	dbh	centimeters	1/age^2	lin	2.52382	1.61683				2.52	67.2	0.25663	36	0.905	2.5	72.4	34
GulfCo	Pyrus calleryana	PYCA	dbh	leaf area	sq. meters	1	loglogw1	-6.59485	8.6294	0.28218			0.2	392.07	0.5312	34	0.876	0.7	345.8	32
GulfCo	Pyrus calleryana	PYCA	dbh	tree ht	meters	1/dbh^2	quad	1.2548	0.34366	-0.00246			2.11	13.26	0.00275	35	0.929	2.1	15.5	32
GulfCo	Quercus laurifolia	QULA2	dbh	age	years	1/dbh	cub	-1.89387	1.12936	-0.01341	8e-05		0	82	1.58824	79	0.866	0	150	75
GulfCo	Quercus laurifolia	QULA2	cdia	dbh	meters	1/cdia	cub	4.74689	0.36508	0.47713	-0.01321		2.11	115.35	18.0623	79	0.838	3.8	149.1	75
GulfCo	Quercus laurifolia	QULA2	dbh	crown dia	meters	1/dbh	quad	0.45655	0.2967	-0.00107			1.08	20.45	0.11964	79	0.896	0.8	26	76
GulfCo	Quercus laurifolia	QULA2	dbh	crown ht	meters	1	lin	2.88885	0.13548				3.17	18.52	7.17656	79	0.747	0.5	26	77
GulfCo	Quercus laurifolia	QULA2	age	dbh	centimeters	1	quad	2.10784	1.84871	-0.0057			2.11	115.35	224.95	79	0.804	3.8	149.1	76
GulfCo	Quercus laurifolia	QULA2	dbh	leaf area	sq. meters	1	loglogw1	-5.39354	7.89886	0.6116			0.74	1664.21	0.78205	70	0.814	0.3	2981.9	68
GulfCo	Quercus laurifolia	QULA2	dbh	tree ht	meters	1	lin	4.92101	0.14921				5.24	22.13	7.43111	79	0.776	1	27	77
GulfCo	Quercus nigra	QUNI	dbh	age	years	1/dbh	cub	-2.92839	1.26734	-0.01355	7e-05		0	68	1.31231	68	0.882	0	75	64
GulfCo	Quercus nigra	QUNI	cdia	dbh	meters	1/cdia^2	cub	3.62839	-1.27094	0.72397	-0.02324		2.53	86.53	0.95912	66	0.926	2.5	100.1	62
GulfCo	Quercus nigra	QUNI	dbh	crown dia	meters	1/dbh	cub	-0.45539	0.50254	-0.00642	3e-05		0.78	17.16	0.09225	66	0.915	0.6	22.9	62
GulfCo	Quercus nigra	QUNI	dbh	crown ht	meters	1/dbh	cub	-0.79716	0.68381	-0.01174	7e-05		0.86	16.83	0.20199	68	0.821	0.7	26	64
GulfCo	Quercus nigra	QUNI	age	dbh	centimeters	1/age^2	cub	2.53058	0.94546	0.0262	-0.00032		2.53	86.53	0.14203	68	0.926	2.5	100.1	64
GulfCo	Quercus nigra	QUNI	dbh	leaf area	sq. meters	1	loglogw1	-2.58415	5.93326	0.59187			1.05	798.73	0.76933	55	0.782	0.7	1563.8	53
GulfCo	Quercus nigra	QUNI	dbh	tree ht	meters	1	loglogw1	0.20225	1.85655	0.04522			1.95	19.93	0.21264	68	0.818	1.4	27	66
GulfCo	Quercus phellos	QUPH	dbh	age	years	1/dbh^2	cub	-3.31901	1.32799	-0.02034	0.00014		1	77	0.05161	45	0.856	0	75	41
GulfCo	Quercus phellos	QUPH	cdia	dbh	meters	1/cdia^2	cub	1.83588	1.6011	0.30119	-0.00819		3.99	115.01	0.58308	45	0.942	2.5	110.7	41
GulfCo	Quercus phellos	QUPH	dbh	crown dia	meters	1	loglogw1	-1.17096	2.7073	0.03622			0.6	21.32	0.19032	45	0.945	0.6	28.2	43
GulfCo	Quercus phellos	QUPH	dbh	crown ht	meters	1	loglogw1	-0.8157	2.42748	0.06636			0.83	19.79	0.2576	45	0.883	0.8	26	43
GulfCo	Quercus phellos	QUPH	age	dbh	centimeters	1/age^2	lin	2.52535	1.46083				2.53	115.01	0.34154	45	0.856	2.5	110.7	43
GulfCo	Quercus phellos	QUPH	dbh	leaf area	sq. meters	1/dbh^2	quad	4.74436	-1.35718	0.12107			1.15	1450.04	2.53072	40	0.897	0.7	1237.4	37
GulfCo	Quercus phellos	QUPH	dbh	tree ht	meters	1	loglogw1	-0.085	2.0556	0.03317			1.52	22.8	0.18213	45	0.916	1.6	29	43
GulfCo	Quercus virginiana	QUVI	dbh	age	years	1/dbh	cub	5.91281	-0.02968	0.01157	-6e-05		1	89	1.27979	76	0.891	1	100	72
GulfCo	Quercus virginiana	QUVI	cdia	dbh	meters	1	loglogw1	1.16399	2.95714	0.06301			3.18	114.54	0.25101	76	0.897	6.1	128.3	74
GulfCo	Quercus virginiana	QUVI	dbh	crown dia	meters	1	loglogw1	-0.98963	2.60139	0.02875			0.14	21.57	0.16956	76	0.923	1.8	27.8	74
GulfCo	Quercus virginiana	QUVI	dbh	crown ht	meters	1	loglogw1	-0.5245	1.92848	0.05789			0.29	12.08	0.2406	75	0.767	2	16	73
GulfCo	Quercus virginiana	QUVI	age	dbh	centimeters	1/sqrt(age)	quad	0.94464	2.24738	-0.01091			0.94	114.54	26.888	76	0.893	6.1	128.3	73
GulfCo	Quercus virginiana	QUVI	dbh	leaf area	sq. meters	1	loglogw1	-6.47065	8.58019	0.34828			0.67	1348.6	0.59015	67	0.914	0.2	1627.9	65
GulfCo	Quercus virginiana	QUVI	dbh	tree ht	meters	1	loglogw1	0.21065	1.62624	0.0348			0.66	15.65	0.18654	76	0.793	3	22	74
GulfCo	Sabal palmetto	SAPA	dbh	crown dia	meters	1/sqrt(ht)	cub	-0.24079	1.12703	0.07723	-0.0168		0.07	5.73				1.3	5.5
GulfCo	Sabal palmetto	SAPA	dbh	crown ht	meters	1/sqrt(ht)	cub	-0.10135	1.00597	0.02174	-0.00777		0.17	5.23				0.5	5.5
GulfCo	Sabal palmetto	SAPA	dbh	leaf area	sq. meters	1/ht	cub	-0.27863	2.31136	1.50028	-0.15086		0.46	36.78
GulfCo	Sabal palmetto	SAPA	dbh	tree ht	meters	1/age^2	cub	0.07502	0.18863	0.00887	-0.00015		0.08	12.57				0.5	12.5
InlEmp	Brachychiton populneum	BRPO	dbh	age	years	1/dbh^2	cub	-0.02017	-0.05881	0.05275	-0.00065		0	50	0.01515	37	0.972	0	45	33
InlEmp	Brachychiton populneum	BRPO	cdia	dbh	meters	1/cdia^2	lin	-7.41513	5.70893				1.68	45	1.30253	37	0.839	1.5	63.8	35
InlEmp	Brachychiton populneum	BRPO	dbh	crown dia	meters	1/dbh	quad	1.35462	0.23061	-0.00172			1.74	9.07	0.0461	37	0.872	1.8	9.3	34
InlEmp	Brachychiton populneum	BRPO	dbh	crown ht	meters	1/dbh	quad	1.14508	0.19443	-0.00135			1.47	8.09	0.0494	37	0.826	1.5	8.5	34
InlEmp	Brachychiton populneum	BRPO	age	dbh	centimeters	1/age	cub	1.67923	2.25021	-0.08017	0.00122		1.68	66.02	0.8343	37	0.967	1.5	63.8	33
InlEmp	Brachychiton populneum	BRPO	dbh	leaf area	sq. meters	1	loglogw1	-3.5765	6.36243	0.29256			0.59	301.24	0.08559	34	0.777	2.3	266	32
InlEmp	Brachychiton populneum	BRPO	dbh	tree ht	meters	1/dbh	quad	1.56417	0.2668	-0.0021			2.01	10.05	0.05091	37	0.888	2	10	34
InlEmp	Cinnamomum camphora	CICA	dbh	age	years	1/dbh^2	quad	-1.03228	0.46251	0.00526			1	125	0.01546	57	0.962	0	95	54
InlEmp	Cinnamomum camphora	CICA	cdia	dbh	meters	1/cdia^2	lin	-11.6899	5.6092				4.37	90	1.06555	57	0.866	2.3	104.3	55
InlEmp	Cinnamomum camphora	CICA	dbh	crown dia	meters	1/dbh	quad	2.3066	0.21129	-0.00067			3.22	19	0.06181	57	0.9	2.8	18.6	54
InlEmp	Cinnamomum camphora	CICA	dbh	crown ht	meters	1/dbh	quad	1.78954	0.16717	-0.00054			2.17	14.63	0.06755	57	0.836	2	15	54
InlEmp	Cinnamomum camphora	CICA	age	dbh	centimeters	1/age	cub	2.27682	2.12158	-0.02701	0.00016		2.28	160.68	1.15781	57	0.978	2.3	104.3	53
InlEmp	Cinnamomum camphora	CICA	dbh	leaf area	sq. meters	1	loglogw1	0.90498	3.56529	0.45187			19.75	1022.07	0.20418	28	0.738	7.5	1512.9	26
InlEmp	Cinnamomum camphora	CICA	dbh	tree ht	meters	1/dbh	quad	2.96218	0.22698	-0.00068			3.48	21.84	0.05906	57	0.918	3.5	20	54
InlEmp	Eucalyptus sideroxylon	EUSI	dbh	age	years	1	loglogw1	-3.28691	4.95089	0.0332			0	80	0.0011	37	0.957	2	75	35
InlEmp	Eucalyptus sideroxylon	EUSI	cdia	dbh	meters	1/sqrt(cdia)	quad	-19.8408	7.75123	-0.16216			4.85	65	45.5411	37	0.684	8.4	95	34
InlEmp	Eucalyptus sideroxylon	EUSI	dbh	crown dia	meters	1	expow1	1.66042	0.01674	0.06526			5.9	20.96	0.00426	37	0.67	4.5	24	35
InlEmp	Eucalyptus sideroxylon	EUSI	dbh	crown ht	meters	1	loglogw1	-0.42969	2.09572	0.08143			2.25	14.81	0.00663	37	0.614	3.5	20.5	35
InlEmp	Eucalyptus sideroxylon	EUSI	age	dbh	centimeters	1/age^2	quad	4.85016	1.82135	-0.01093			4.85	80.62	0.04984	37	0.963	8.4	95	34
InlEmp	Eucalyptus sideroxylon	EUSI	dbh	leaf area	sq. meters	1	expow1	3.41319	0.04069	0.17979			40.46	882.87	0.03232	34	0.815	26.3	1292.3	32
InlEmp	Eucalyptus sideroxylon	EUSI	dbh	tree ht	meters	1	expow1	1.78929	0.01692	0.05577			6.68	24.07	0.00311	37	0.708	5.5	27.5	35
InlEmp	Fraxinus uhdei	FRUH	dbh	age	years	1	quad	-12.6224	1.18756	-0.00682			1	90	19.3436	37	0.851	5	40	34
InlEmp	Fraxinus uhdei	FRUH	cdia	dbh	meters	1	loglogw1	0.54286	3.43609	0.05432			1.29	117.96	0.00295	37	0.811	14.1	120.5	35
InlEmp	Fraxinus uhdei	FRUH	dbh	crown dia	meters	1	loglogw1	-0.7885	2.50884	0.02599			0.29	23.31	0.00068	37	0.826	4	25	35
InlEmp	Fraxinus uhdei	FRUH	dbh	crown ht	meters	1/dbh	lin	3.72398	0.1558				3.93	22.11	0.1002	37	0.778	3.5	21.5	35
InlEmp	Fraxinus uhdei	FRUH	age	dbh	centimeters	1/sqrt(age)	loglogw2	1.13547	2.4092	0.01081			1.29	118.04	0.00012	37	0.859	14.1	120.5	35
InlEmp	Fraxinus uhdei	FRUH	dbh	leaf area	sq. meters	1/dbh	loglogw3	-1.72679	5.6651	0.00208			0.06	1255.73	0	37	0.902	52.2	1948.2	35
InlEmp	Fraxinus uhdei	FRUH	dbh	tree ht	meters	1	loglogw1	-0.72201	2.56053	0.02087			0.31	26.82	0.00044	37	0.861	4.5	28.5	35
InlEmp	Fraxinus velutina 'Modesto'	FRVE_G	dbh	age	years	1/dbh	cub	2.25199	-0.65051	0.07444	-0.00087		0	59	1.00211	36	0.938	0	50	32
InlEmp	Fraxinus velutina 'Modesto'	FRVE_G	cdia	dbh	meters	1/cdia^2	quad	-13.389	8.10614	-0.22181			3.02	50.32	1.11783	36	0.887	2.9	59.9	33
InlEmp	Fraxinus velutina 'Modesto'	FRVE_G	dbh	crown dia	meters	1/dbh	quad	1.53842	0.24366	-0.00141			2.26	10.23	0.07356	36	0.877	2	15	33
InlEmp	Fraxinus velutina 'Modesto'	FRVE_G	dbh	crown ht	meters	1	loglogw1	-0.35977	1.75665	0.07464			1.31	7.88	0.00557	36	0.794	1	13	34
InlEmp	Fraxinus velutina 'Modesto'	FRVE_G	age	dbh	centimeters	1/age	quad	3.02365	1.59851	-0.01351			3.02	50.32	1.66632	36	0.95	2.9	59.9	33
InlEmp	Fraxinus velutina 'Modesto'	FRVE_G	dbh	leaf area	sq. meters	1	loglogw1	0.16249	3.98037	0.2948			11.92	319.17	0.08691	36	0.834	3.2	479.2	34
InlEmp	Fraxinus velutina 'Modesto'	FRVE_G	dbh	tree ht	meters	1/dbh	quad	2.2959	0.26454	-0.00136			3.08	12.15	0.07705	36	0.897	3	17	33
InlEmp	Ginkgo biloba	GIBI	dbh	age	years	1/dbh	cub	3.90604	-0.32381	0.05349	-0.00056		1	50	1.11829	37	0.911	2	55	33
InlEmp	Ginkgo biloba	GIBI	cdia	dbh	meters	1	loglogw1	0.84634	2.82324	0.10942			1.37	50.82	0.01197	37	0.775	2.4	74.7	35
InlEmp	Ginkgo biloba	GIBI	dbh	crown dia	meters	1	loglogw1	0.04666	1.92419	0.0543			0.81	15.12	0.00295	37	0.791	1.5	21.5	35
InlEmp	Ginkgo biloba	GIBI	dbh	crown ht	meters	1	loglogw1	-0.22099	2.05741	0.06862			0.64	13.76	0.00471	37	0.774	1	19.5	35
InlEmp	Ginkgo biloba	GIBI	age	dbh	centimeters	1/age	cub	-0.86799	2.29723	-0.05924	0.00068		1.37	50.82	1.84087	37	0.87	2.4	74.7	33
InlEmp	Ginkgo biloba	GIBI	dbh	leaf area	sq. meters	1	loglogw1	-1.81743	5.51228	0.20833			0.08	349.29	0.0434	35	0.889	0.8	689.6	33
InlEmp	Ginkgo biloba	GIBI	dbh	tree ht	meters	1	loglogw1	0.24141	1.8408	0.04822			1.02	16.12	0.00233	37	0.796	2	23.5	35
InlEmp	Jacaranda mimosifolia	JAMI	dbh	age	years	1/dbh^2	cub	-1.41006	0.69075	-0.01366	0.00039		0	66	0.01808	63	0.949	0	55	59
InlEmp	Jacaranda mimosifolia	JAMI	cdia	dbh	meters	1/cdia^2	quad	-11.5606	5.82312	-0.11904			2	50	0.42648	63	0.902	2	55.4	60
InlEmp	Jacaranda mimosifolia	JAMI	dbh	crown dia	meters	1/dbh	quad	1.83155	0.28614	-0.00136			2.4	15.15	0.07778	63	0.887	2.3	15.2	60
InlEmp	Jacaranda mimosifolia	JAMI	dbh	crown ht	meters	1	loglogw1	-0.00134	1.68344	0.04504			1.21	11.53	0.00203	63	0.807	1.5	13.5	61
InlEmp	Jacaranda mimosifolia	JAMI	age	dbh	centimeters	1/sqrt(age)	cub	2.00317	2.47309	-0.05587	0.00051		2	69.4	3.18925	63	0.971	2	55.4	59
InlEmp	Jacaranda mimosifolia	JAMI	dbh	leaf area	sq. meters	1	loglogw1	-1.37513	5.43609	0.18051			4.8	724.86	0.03258	34	0.892	3.9	591.3	32
InlEmp	Jacaranda mimosifolia	JAMI	dbh	tree ht	meters	1/dbh	quad	2.51941	0.34807	-0.00252			3.21	14.52	0.07485	63	0.901	3	17	60
InlEmp	Lagerstroemia indica	LAIN	dbh	age	years	1/dbh	cub	-4.65756	1.60361	0.05223	-0.00139		0	65	0.90321	61	0.966	0	65	57
InlEmp	Lagerstroemia indica	LAIN	cdia	dbh	meters	1/cdia^2	lin	-4.71613	4.05211				2.79	34.54	0.57243	61	0.846	2.6	33.9	59
InlEmp	Lagerstroemia indica	LAIN	dbh	crown dia	meters	1/dbh	lin	1.6479	0.22012				2.26	9.25	0.05045	61	0.864	1.9	10.3	59
InlEmp	Lagerstroemia indica	LAIN	dbh	crown ht	meters	1/dbh	lin	0.80456	0.1894				1.33	7.35	0.09044	61	0.724	0.5	10.5	59
InlEmp	Lagerstroemia indica	LAIN	age	dbh	centimeters	1/sqrt(age)	lin	2.78513	0.48853				2.79	34.54	0.81649	61	0.976	2.6	33.9	59
InlEmp	Lagerstroemia indica	LAIN	dbh	leaf area	sq. meters	1	loglogw1	-0.15182	4.39671	0.17646			4.84	252.73	0.03114	33	0.911	1.6	577.1	31
InlEmp	Lagerstroemia indica	LAIN	dbh	tree ht	meters	1	expow1	1.18647	0.03461	0.0306			3.66	10.99	0.00094	61	0.769	2.5	13.5	59
InlEmp	Liquidambar styraciflua	LIST	dbh	age	years	1/dbh^2	lin	-2.23131	0.94906				0	100	0.0429	38	0.933	0	70	36
InlEmp	Liquidambar styraciflua	LIST	cdia	dbh	meters	1	loglogw1	-0.33889	4.01341	0.06754			2.49	69.6	0.00456	38	0.905	2.5	74.7	36
InlEmp	Liquidambar styraciflua	LIST	dbh	crown dia	meters	1/dbh	cub	1.54158	0.58462	-0.00943	7e-05		2.94	18.83	0.0868	38	0.936	2.8	19.8	34
InlEmp	Liquidambar styraciflua	LIST	dbh	crown ht	meters	1/dbh	cub	1.7242	0.51029	-0.00877	7e-05		2.94	17.02	0.10404	38	0.899	2.8	18	34
InlEmp	Liquidambar styraciflua	LIST	age	dbh	centimeters	1/age^2	quad	2.48674	1.32423	-0.00653			2.49	69.6	0.0829	38	0.931	2.5	74.7	35
InlEmp	Liquidambar styraciflua	LIST	dbh	leaf area	sq. meters	1/dbh^2	cub	-3.55804	4.92387	-0.07013	0.00263		8.29	887.03	4.16913	35	0.897	8.7	1075.6	31
InlEmp	Liquidambar styraciflua	LIST	dbh	tree ht	meters	1/dbh	cub	1.35897	0.65896	-0.0101	7e-05		2.94	20.64	0.088	38	0.95	2.8	22	34
InlEmp	Liriodendron tulipifera	LITU	dbh	age	years	1/dbh^2	cub	-0.17165	0.04245	0.03438	-0.00033		0	65	0.02766	37	0.944	0	65	33
InlEmp	Liriodendron tulipifera	LITU	cdia	dbh	meters	1	loglogw1	0.16395	3.64795	0.11621			1.98	83.06	0.01351	37	0.841	1.7	79.7	35
InlEmp	Liriodendron tulipifera	LITU	dbh	crown dia	meters	1/dbh	quad	1.97888	0.35383	-0.00178			2.67	19.07	0.17066	37	0.88	2.3	24.5	34
InlEmp	Liriodendron tulipifera	LITU	dbh	crown ht	meters	1/dbh	quad	1.1692	0.33431	-0.0017			1.82	17.24	0.17972	37	0.861	1.4	23	34
InlEmp	Liriodendron tulipifera	LITU	age	dbh	centimeters	1/age	cub	1.97704	2.27475	-0.05281	0.00057		1.98	83.06	1.6526	37	0.96	1.7	79.7	33
InlEmp	Liriodendron tulipifera	LITU	dbh	leaf area	sq. meters	1	loglogw1	0.24326	4.21096	0.24744			11.85	762.03	0.06123	35	0.876	1.8	1321.9	33
InlEmp	Liriodendron tulipifera	LITU	dbh	tree ht	meters	1/dbh	quad	2.78857	0.37335	-0.00187			3.52	20.9	0.1726	37	0.89	3.2	26	34
InlEmp	Magnolia grandiflora	MAGR	dbh	age	years	1/dbh	quad	-3.96093	1.28935	-0.0036			0	72	0.83821	37	0.955	0	75	34
InlEmp	Magnolia grandiflora	MAGR	cdia	dbh	meters	1	loglogw1	0.96319	3.14825	0.13005			2.24	50	0.01691	37	0.83	2.2	79	35
InlEmp	Magnolia grandiflora	MAGR	dbh	crown dia	meters	1/dbh	quad	1.39582	0.2737	-0.00179			2	11.88	0.0848	37	0.854	1.9	12.5	34
InlEmp	Magnolia grandiflora	MAGR	dbh	crown ht	meters	1/sqrt(dbh)	quad	0.59571	0.26523	-0.00179			1.18	10.43	0.43492	37	0.809	1	11	34
InlEmp	Magnolia grandiflora	MAGR	age	dbh	centimeters	1/age	cub	2.24478	1.27655	-0.01904	0.00022		2.24	76.34	0.69657	37	0.969	2.2	79	33
InlEmp	Magnolia grandiflora	MAGR	dbh	leaf area	sq. meters	1/dbh^2	quad	3.84614	-0.77606	0.2235			3.23	1246.99	5.23418	36	0.875	2.2	790.2	33
InlEmp	Magnolia grandiflora	MAGR	dbh	tree ht	meters	1/dbh	quad	2.18145	0.28431	-0.00182			2.81	13.27	0.08082	37	0.871	2.7	14	34
InlEmp	Pinus brutia	PIBR2	dbh	age	years	1	loglogw1	-0.47494	2.51089	0.02795			0	25	0.00078	37	0.934	2	26	35
InlEmp	Pinus brutia	PIBR2	cdia	dbh	meters	1/cdia^2	lin	-11.4053	5.9577				5.28	53.54	1.23616	37	0.877	3.8	77.3	35
InlEmp	Pinus brutia	PIBR2	dbh	crown dia	meters	1/sqrt(dbh)	quad	1.72053	0.28469	-0.00227			3.16	10.44	0.23156	37	0.872	2.8	12.5	34
InlEmp	Pinus brutia	PIBR2	dbh	crown ht	meters	1/sqrt(dbh)	quad	1.63706	0.24103	-0.00193			2.6	9.08	0.2253	37	0.833	2	11	34
InlEmp	Pinus brutia	PIBR2	age	dbh	centimeters	1/age^2	cub	5.28421	-1.37336	0.41881	-0.01147		4.12	55.74	0.17426	37	0.956	3.8	77.3	33
InlEmp	Pinus brutia	PIBR2	dbh	leaf area	sq. meters	1/dbh^2	cub	13.0076	-2.35505	0.25355	-0.00218		7.32	279.18	1.02815	36	0.937	4	405.1	32
InlEmp	Pinus brutia	PIBR2	dbh	tree ht	meters	1/dbh	quad	1.80404	0.32833	-0.00262			3.11	11.96	0.04326	37	0.932	3	14	34
InlEmp	Pinus canariensis	PICA	dbh	age	years	1	loglogw1	-2.70308	4.37036	0.06456			0	40	0.00417	39	0.979	0	35	37
InlEmp	Pinus canariensis	PICA	cdia	dbh	meters	1	loglogw1	0.25485	3.42584	0.02735			0.97	84.36	0.00075	39	0.972	1	73.7	37
InlEmp	Pinus canariensis	PICA	dbh	crown dia	meters	1/dbh^2	quad	1.18494	0.41354	-0.00172			1.59	23.82	0.00209	39	0.978	1.6	26.5	36
InlEmp	Pinus canariensis	PICA	dbh	crown ht	meters	1/dbh^2	quad	0.95715	0.39599	-0.00189			1.34	20.89	0.00223	39	0.973	1.3	24.5	36
InlEmp	Pinus canariensis	PICA	age	dbh	centimeters	1/age^2	cub	0.97362	2.63793	-0.05828	0.00111		0.97	84.36	0.12279	39	0.966	1	73.7	35
InlEmp	Pinus canariensis	PICA	dbh	leaf area	sq. meters	1	loglogw1	-2.76964	6.24403	0.10191			0.89	734.1	0.01039	37	0.923	8.1	854.1	35
InlEmp	Pinus canariensis	PICA	dbh	tree ht	meters	1/dbh^2	cub	1.49872	0.34623	0.0031	-5e-05		1.84	22.7	0.00219	39	0.979	1.8	28.5	35
InlEmp	Pistacia chinensis	PICH	dbh	age	years	1/dbh^2	cub	-0.68614	0.15765	0.04973	-0.00084		0	32	0.01733	40	0.956	0	30	36
InlEmp	Pistacia chinensis	PICH	cdia	dbh	meters	1	loglogw1	0.78237	3.21408	0.0762			2.62	38.97	0.00581	40	0.825	2.3	36.1	38
InlEmp	Pistacia chinensis	PICH	dbh	crown dia	meters	1	loglogw1	0.35225	1.3224	0.02902			2.95	8.11	0.00084	40	0.802	2.1	9	38
InlEmp	Pistacia chinensis	PICH	dbh	crown ht	meters	1/dbh	quad	0.18208	0.37442	-0.00548			1.12	6.57	0.05996	40	0.837	1.1	8	37
InlEmp	Pistacia chinensis	PICH	age	dbh	centimeters	1/sqrt(age)	cub	2.61799	2.05051	-0.091	0.00195		2.62	38.97	1.19202	40	0.977	2.3	36.1	36
InlEmp	Pistacia chinensis	PICH	dbh	leaf area	sq. meters	1	loglogw1	0.08063	4.16055	0.34948			12.3	294.56	0.12214	38	0.776	3.4	330.4	36
InlEmp	Pistacia chinensis	PICH	dbh	tree ht	meters	1/dbh	quad	2.20203	0.3496	-0.00421			3.09	9.43	0.04356	40	0.885	3	10.5	37
InlEmp	Platanus x acerifolia	PLAC	dbh	age	years	1/dbh^2	quad	-1.79227	0.80163	-0.00426			0	55	0.0415	38	0.853	0	40	35
InlEmp	Platanus x acerifolia	PLAC	cdia	dbh	meters	1	loglogw1	0.0716	3.74341	0.09534			3.01	57.25	0.00909	38	0.851	2.5	71.8	36
InlEmp	Platanus x acerifolia	PLAC	dbh	crown dia	meters	1/dbh	cub	1.51621	0.505	-0.00879	7e-05		2.96	14.1	0.09866	38	0.883	2.8	18.3	34
InlEmp	Platanus x acerifolia	PLAC	dbh	crown ht	meters	1	loglogw1	0.16744	1.64026	0.0441			2.08	11.9	0.00194	38	0.833	2	16.5	36
InlEmp	Platanus x acerifolia	PLAC	age	dbh	centimeters	1/age	quad	3.0111	1.97885	-0.01805			3.01	57.25	5.17797	38	0.877	2.5	71.8	35
InlEmp	Platanus x acerifolia	PLAC	dbh	leaf area	sq. meters	1	loglogw1	-0.91056	5.40545	0.16311			10.07	855.15	0.0266	32	0.943	0.9	1283.6	30
InlEmp	Platanus x acerifolia	PLAC	dbh	tree ht	meters	1/dbh	quad	2.7162	0.40272	-0.00295			3.9	16.09	0.12242	38	0.879	3.5	20	35
InlEmp	Platanus racemosa	PLRA	dbh	age	years	1/dbh	lin	-1.84668	0.60477				0	62	0.36994	37	0.956	0	50	35
InlEmp	Platanus racemosa	PLRA	cdia	dbh	meters	1	loglogw1	0.16604	3.54218	0.07447			2.85	90.47	0.00555	37	0.89	2.8	82.5	35
InlEmp	Platanus racemosa	PLRA	dbh	crown dia	meters	1/dbh	quad	1.59635	0.42899	-0.00233			2.8	21.36	0.1876	37	0.897	2.8	27	34
InlEmp	Platanus racemosa	PLRA	dbh	crown ht	meters	1/dbh	quad	1.48429	0.38041	-0.00201			2.55	19.42	0.18603	37	0.876	2.5	25	34
InlEmp	Platanus racemosa	PLRA	age	dbh	centimeters	1/age	quad	2.84648	1.95623	-0.00876			2.85	90.47	2.10357	37	0.968	2.8	82.5	34
InlEmp	Platanus racemosa	PLRA	dbh	leaf area	sq. meters	1	loglogw1	-1.89662	6.15959	0.17033			5.26	1763.27	0.02901	28	0.874	9.7	1452.7	26
InlEmp	Platanus racemosa	PLRA	dbh	tree ht	meters	1/dbh	quad	1.7084	0.47757	-0.00264			3.05	23.29	0.19508	37	0.91	3	29	34
InlEmp	Pyrus calleryana	PYCA	dbh	age	years	1/dbh	cub	-1.36293	0.68999	0.03182	-0.00078		0	29	1.29938	39	0.82	0	38	35
InlEmp	Pyrus calleryana	PYCA	cdia	dbh	meters	1	loglogw1	0.92902	3.02429	0.11189			3	38.84	0.01252	39	0.798	2.9	45.4	37
InlEmp	Pyrus calleryana	PYCA	dbh	crown dia	meters	1/dbh	lin	1.95799	0.21192				2.59	10.19	0.10652	39	0.809	2.3	13.5	37
InlEmp	Pyrus calleryana	PYCA	dbh	crown ht	meters	1/dbh	lin	1.13411	0.19679				1.72	8.78	0.10595	39	0.786	1.4	12	37
InlEmp	Pyrus calleryana	PYCA	age	dbh	centimeters	1/age	cub	2.99896	0.27152	0.10985	-0.00264		3	38.84	2.06481	39	0.919	2.9	45.4	35
InlEmp	Pyrus calleryana	PYCA	dbh	leaf area	sq. meters	1	loglogw1	-1.18979	5.20555	0.21435			2.58	300.81	0.04594	27	0.903	2.8	578.6	25
InlEmp	Pyrus calleryana	PYCA	dbh	tree ht	meters	1/dbh	lin	2.78188	0.22705				3.46	11.6	0.11432	39	0.82	3.2	15	37
InlEmp	Quercus agrifolia	QUAG	dbh	age	years	1/sqrt(dbh)	loglogw2	-2.29699	4.44315	0.00519			1	128	3e-05	37	0.984	1	100	35
InlEmp	Quercus agrifolia	QUAG	cdia	dbh	meters	1	loglogw1	0.50946	3.91294	0.09609			4.45	114.72	0.00923	37	0.838	4.4	108.4	35
InlEmp	Quercus agrifolia	QUAG	dbh	crown dia	meters	1/dbh	quad	2.15346	0.2119	-0.00097			3.08	13.64	0.05835	37	0.873	2.8	16.5	34
InlEmp	Quercus agrifolia	QUAG	dbh	crown ht	meters	1	loglogw1	-0.30683	1.79635	0.04109			1.44	12.19	0.00169	37	0.813	2	15	35
InlEmp	Quercus agrifolia	QUAG	age	dbh	centimeters	1/age^2	quad	3.18134	1.27341	-0.00314			3.18	114.72	0.04961	37	0.954	4.4	108.4	34
InlEmp	Quercus agrifolia	QUAG	dbh	leaf area	sq. meters	1/dbh^2	lin	-35.9993	8.6194				2.37	952.86	5.69086	27	0.883	4.9	994.1	25
InlEmp	Quercus agrifolia	QUAG	dbh	tree ht	meters	1/dbh	quad	2.92172	0.22352	-0.00096			3.62	15.87	0.07003	37	0.873	3.5	18	34
InlEmp	Quercus ilex	QUIL2	dbh	age	years	1/sqrt(dbh)	lin	1.12908	0.69147				1	61	2.23676	35	0.946	3	52	33
InlEmp	Quercus ilex	QUIL2	cdia	dbh	meters	1/sqrt(cdia)	lin	-1.29025	4.02112				2.13	84.06	19.7812	35	0.867	4.7	85.2	33
InlEmp	Quercus ilex	QUIL2	dbh	crown dia	meters	1/sqrt(dbh)	lin	1.72826	0.21509				2.19	19.81	0.55476	35	0.873	2.5	22.3	33
InlEmp	Quercus ilex	QUIL2	dbh	crown ht	meters	1/sqrt(dbh)	quad	2.1768	0.11106	0.00116			2.26	19.74	0.56003	35	0.855	1.5	21	32
InlEmp	Quercus ilex	QUIL2	age	dbh	centimeters	1/age	lin	0.76093	1.36553				0.76	84.06	1.01403	35	0.954	4.7	85.2	33
InlEmp	Quercus ilex	QUIL2	dbh	leaf area	sq. meters	1/dbh^2	quad	3.4758	1.686	0.16674			7.81	1323.36	9.2376	32	0.876	11.8	1749.9	29
InlEmp	Quercus ilex	QUIL2	dbh	tree ht	meters	1/dbh	lin	2.51779	0.22708				2.69	21.61	0.09136	35	0.898	3	23.5	33
InlEmp	Schinus molle	SCMO	dbh	age	years	1/dbh^2	cub	-2.1309	0.68221	0.00923	-6e-05		1	106	0.02357	37	0.962	0	100	33
InlEmp	Schinus molle	SCMO	cdia	dbh	meters	1	loglogw1	0.04107	4.62418	0.15793			4.25	114.62	0.02494	37	0.846	3.1	145.7	35
InlEmp	Schinus molle	SCMO	dbh	crown dia	meters	1	loglogw1	0.47058	1.28909	0.03524			3.13	12.14	0.00124	37	0.835	2.5	16	35
InlEmp	Schinus molle	SCMO	dbh	crown ht	meters	1	loglogw1	0.28963	1.32942	0.04926			2.21	10.68	0.00243	37	0.793	2	14	35
InlEmp	Schinus molle	SCMO	age	dbh	centimeters	1/age	lin	3.19622	1.05121				3.2	114.62	2.09246	37	0.962	3.1	145.7	35
InlEmp	Schinus molle	SCMO	dbh	leaf area	sq. meters	1/sqrt(dbh)	loglogw2	0.05961	4.14402	0.03418			8.77	688.13	0.00117	28	0.914	5.3	1224.5	26
InlEmp	Schinus molle	SCMO	dbh	tree ht	meters	1	loglogw1	0.61808	1.26101	0.03047			2.96	13.29	0.00093	37	0.848	3	18	35
InlEmp	Schinus terebinthifolius	SCTE	dbh	age	years	1/dbh^2	cub	-1.10712	0.11515	0.04393	-0.00056		1	62	0.0059	36	0.989	0	45	32
InlEmp	Schinus terebinthifolius	SCTE	cdia	dbh	meters	1/cdia^2	quad	-25.6562	16.0947	-0.83803			5.02	49	2.977	36	0.768	3.9	68.6	33
InlEmp	Schinus terebinthifolius	SCTE	dbh	crown dia	meters	1/dbh	loglogw3	0.17252	1.25983	0.00087			2.48	7.41	0	36	0.915	2	9	34
InlEmp	Schinus terebinthifolius	SCTE	dbh	crown ht	meters	1/dbh	loglogw3	-0.50271	1.64352	0.00136			1.31	6.9	0	36	0.921	1.2	8	34
InlEmp	Schinus terebinthifolius	SCTE	age	dbh	centimeters	1/age	lin	3.93912	1.0768				3.94	70.7	1.29178	36	0.966	3.9	68.6	34
InlEmp	Schinus terebinthifolius	SCTE	dbh	leaf area	sq. meters	1	expow1	2.75277	0.05127	0.19524			22.37	648.84	0.03812	33	0.715	8.2	607.3	31
InlEmp	Schinus terebinthifolius	SCTE	dbh	tree ht	meters	1/dbh	loglogw3	0.60229	1.0438	0.00068			2.98	8.52	0	36	0.904	2.8	10	34
InlEmp	Washingtonia robusta	WARO	dbh	crown dia	meters	1/ht	quad	0.09678	0.411	-0.00834			0.03	5.12				2.5	5.9
InlEmp	Washingtonia robusta	WARO	dbh	crown ht	meters	1/ht	quad	0.115	0.433	-0.0094			0.38	5.1				1	4.5
InlEmp	Washingtonia robusta	WARO	dbh	leaf area	sq. meters	1/ht	cub	0.116	0.09026	0.22	-0.00547		0.11	51.04				0.1	61.5
InlEmp	Washingtonia robusta	WARO	dbh	tree ht	meters	1/age	quart	-0.163	0.783	0.00079	-0.00015	9.06e-07	0.62	30.53				1.5	23.5
InlVal	Acer saccharinum	ACSA1	dbh	age	years	1/sqrt(dbh)	lin	2.76124	0.52827				1	75	7.80431	29	0.888	0	67	27
InlVal	Acer saccharinum	ACSA1	cdia	dbh	meters	1/cdia	quad	-1.23065	2.64367	0.14384			1.22	19.37	11.1587	29	0.927	2.5	119.9	26
InlVal	Acer saccharinum	ACSA1	dbh	crown dia	meters	1	loglogw1	-0.30003	2.0639	0.02938			1.22	19.37	0.17141	29	0.949	1	20.8	27
InlVal	Acer saccharinum	ACSA1	dbh	crown ht	meters	1/sqrt(dbh)	quad	1.45287	0.31925	-0.00128			2.25	21.35	1.0934	29	0.885	0.5	24.5	26
InlVal	Acer saccharinum	ACSA1	age	dbh	centimeters	1/age	lin	2.51245	1.6505				2.51	126.3	6.78131	29	0.924	2.5	119.9	27
InlVal	Acer saccharinum	ACSA1	dbh	leaf area	sq. meters	1	loglogw1	0.04738	4.34358	0.07905			3.23	1030.69	0.28115	28	0.969	2.5	1307.3	26
InlVal	Acer saccharinum	ACSA1	dbh	tree ht	meters	1	loglogw1	0.3591	1.81159	0.03437			2.22	25.15	0.1854	29	0.924	2	29.5	27
InlVal	Betula pendula	BEPE	dbh	age	years	1/sqrt(dbh)	quad	-3.32796	1.93304	-0.02674			0	51	11.1797	29	0.592	0	38	26
InlVal	Betula pendula	BEPE	cdia	dbh	meters	1/cdia^2	lin	0.25935	3.64604				0.62	11.18	1.13006	29	0.874	2.5	47.6	27
InlVal	Betula pendula	BEPE	dbh	crown dia	meters	1/dbh^2	cub	-1.41102	0.88459	-0.03377	0.00044		0.62	11.18	0.00314	29	0.751	0.6	10.3	25
InlVal	Betula pendula	BEPE	dbh	crown ht	meters	1	loglogw1	-0.53196	2.37568	0.07297			1.09	15.04	0.27012	29	0.765	0.8	14	27
InlVal	Betula pendula	BEPE	age	dbh	centimeters	1/age^2	lin	2.53121	0.87957				2.53	47.39	0.11735	29	0.859	2.5	47.6	27
InlVal	Betula pendula	BEPE	dbh	leaf area	sq. meters	1	loglogw1	0.19484	3.92178	0.18512			3.99	271.48	0.43025	28	0.778	1.9	278.9	26
InlVal	Betula pendula	BEPE	dbh	tree ht	meters	1	loglogw1	0.16763	1.93095	0.03647			1.9	16.35	0.19096	29	0.812	1.5	15.5	27
InlVal	Celtis sinensis	CESI4	dbh	age	years	1/dbh	quad	-2.50991	0.96783	-0.00548			1	70	1.20444	30	0.853	0	55	27
InlVal	Celtis sinensis	CESI4	cdia	dbh	meters	1/(cdia)^2	loglogw4	2.06657	1.79145	0.00033			0.69	16.4	0.01819	30	0.956	2.5	82.5	28
InlVal	Celtis sinensis	CESI4	dbh	crown dia	meters	1/(dbh)^2	loglogw4	-0.96824	2.60965	1e-05			0.69	16.4	0.00287	30	0.998	0.7	21.9	28
InlVal	Celtis sinensis	CESI4	dbh	crown ht	meters	1/(dbh)^2	loglogw4	-1.11779	2.59242	2e-05			0.59	14.25	0.00488	30	0.994	0.6	18	28
InlVal	Celtis sinensis	CESI4	age	dbh	centimeters	1/age^2	quad	2.5184	2.16011	-0.01839			2.52	65.95	0.16058	30	0.935	2.5	82.5	27
InlVal	Celtis sinensis	CESI4	dbh	leaf area	sq. meters	1/(dbh)^2	loglogw4	-0.29449	4.61852	6e-05			2.15	645.89	0.00781	28	0.995	2.2	1280.7	26
InlVal	Celtis sinensis	CESI4	dbh	tree ht	meters	1/(dbh)^2	loglogw4	0.16259	1.81586	1e-05			1.8	16.4	0.00365	30	0.993	1.8	22	28
InlVal	Cinnamomum camphora	CICA	dbh	age	years	1/dbh	lin	-0.68256	0.77821				1	122	2.61513	33	0.808	0	100	31
InlVal	Cinnamomum camphora	CICA	cdia	dbh	meters	1/cdia^2	lin	-1.87648	4.29076				1.07	20.42	0.36129	33	0.963	2.5	104	31
InlVal	Cinnamomum camphora	CICA	dbh	crown dia	meters	1/dbh	quad	0.42322	0.25774	-0.00051			1.07	20.42	0.02985	33	0.968	1	22.2	30
InlVal	Cinnamomum camphora	CICA	dbh	crown ht	meters	1/sqrt(dbh)	loglogw2	-0.78021	2.14885	0.01352			0.76	12.82	0.11626	33	0.902	0.9	18.5	31
InlVal	Cinnamomum camphora	CICA	age	dbh	centimeters	1/age^2	quad	2.52476	1.52318	-0.00624			2.52	95.47	0.21686	33	0.883	2.5	104	30
InlVal	Cinnamomum camphora	CICA	dbh	leaf area	sq. meters	1/dbh^2	quad	0.88728	0.06831	0.12893			1.88	1182.54	3.14444	33	0.901	1.7	1512.9	30
InlVal	Cinnamomum camphora	CICA	dbh	tree ht	meters	1/(dbh)^2	loglogw4	0.35146	1.43974	5e-05			1.98	15.56	0.00671	33	0.976	2	21.5	31
InlVal	Fraxinus angustifolia 'Raywood'	FRAN_R	dbh	age	years	1/dbh^2	lin	-1.47999	0.6059				0	40	0.02682	33	0.906	0	40	31
InlVal	Fraxinus angustifolia 'Raywood'	FRAN_R	cdia	dbh	meters	1/cdia^2	lin	-2.07474	4.398				1.02	11.68	0.90215	33	0.922	2.5	72	31
InlVal	Fraxinus angustifolia 'Raywood'	FRAN_R	dbh	crown dia	meters	1/sqrt(dbh)	loglogw2	-0.46082	2.09714	0.00387			1.02	11.68	0.06218	33	0.958	1	15.5	31
InlVal	Fraxinus angustifolia 'Raywood'	FRAN_R	dbh	crown ht	meters	1	loglogw1	-0.40477	2.08544	0.03835			1.11	12.11	0.19584	33	0.832	0.9	15.5	31
InlVal	Fraxinus angustifolia 'Raywood'	FRAN_R	age	dbh	centimeters	1/age^2	quad	2.51452	2.54844	-0.03194			2.51	53.34	0.21502	33	0.933	2.5	72	30
InlVal	Fraxinus angustifolia 'Raywood'	FRAN_R	dbh	leaf area	sq. meters	1/dbh^2	lin	-15.6707	7.08439				2.14	362.25	4.01682	33	0.898	2.2	520	31
InlVal	Fraxinus angustifolia 'Raywood'	FRAN_R	dbh	tree ht	meters	1/sqrt(dbh)	loglogw2	0.30682	1.72462	0.00325			2.02	14.99	0.05701	33	0.948	2	19	31
InlVal	Fraxinus excelsior 'Hessei'	FREX_H	dbh	age	years	1/dbh	lin	-0.78696	0.79416				0	60	1.08254	29	0.868	0	55	27
InlVal	Fraxinus excelsior 'Hessei'	FREX_H	cdia	dbh	meters	1/cdia^2	cub	-1.0271	4.49547	-0.39473	0.03549		0.99	12.83	0.27266	29	0.959	2.5	66	25
InlVal	Fraxinus excelsior 'Hessei'	FREX_H	dbh	crown dia	meters	1/dbh^2	quad	-0.07932	0.35604	-0.00245			0.99	12.83	0.00117	29	0.969	0.8	13	26
InlVal	Fraxinus excelsior 'Hessei'	FREX_H	dbh	crown ht	meters	1	quad	1.50152	0.28401	-0.00281			2.35	8.67	0.79632	29	0.821	0.8	10	26
InlVal	Fraxinus excelsior 'Hessei'	FREX_H	age	dbh	centimeters	1/sqrt(age)	lin	3.06926	1.12052				3.07	70.3	9.15551	29	0.902	2.5	66	27
InlVal	Fraxinus excelsior 'Hessei'	FREX_H	dbh	leaf area	sq. meters	1	loglogw1	-0.97023	4.66291	0.12365			2.25	351.5	0.35164	29	0.943	1.5	360	27
InlVal	Fraxinus excelsior 'Hessei'	FREX_H	dbh	tree ht	meters	1	cub	1.56888	0.53975	-0.01229	0.00011		3.11	16.43	0.48923	29	0.944	2	15.2	25
InlVal	Fraxinus holotricha	FRHO	dbh	age	years	1/dbh^2	cub	-3.02776	1.2452	-0.01964	0.00014		0	76	0.01091	31	0.957	0	60	27
InlVal	Fraxinus holotricha	FRHO	cdia	dbh	meters	1/(cdia)^2	loglogw4	2.04596	2.09605	0.00032			0.8	15.47	0.01791	31	0.995	2.5	102	29
InlVal	Fraxinus holotricha	FRHO	dbh	crown dia	meters	1/sqrt(dbh)	loglogw2	-0.75718	2.31301	0.00297			0.8	15.47	0.05453	31	0.976	0.8	16.5	29
InlVal	Fraxinus holotricha	FRHO	dbh	crown ht	meters	1/(dbh)^2	loglogw4	-0.75797	2.28159	2e-05			0.79	15.76	0.0045	31	0.991	0.8	21	29
InlVal	Fraxinus holotricha	FRHO	age	dbh	centimeters	1/age^2	quad	2.51709	2.29152	-0.01509			2.52	89.54	0.12192	31	0.962	2.5	102	28
InlVal	Fraxinus holotricha	FRHO	dbh	leaf area	sq. meters	1/sqrt(dbh)	loglogw2	-0.25744	4.41008	0.02085			2.16	651.97	0.1444	31	0.955	2.2	767.6	29
InlVal	Fraxinus holotricha	FRHO	dbh	tree ht	meters	1/(dbh)^2	loglogw4	0.30012	1.67602	1e-05			1.98	17.85	0.00384	31	0.988	2	25	29
InlVal	Fraxinus pennsylvanica 'Marshall'	FRPE_M	dbh	age	years	1/dbh^2	lin	-1.7674	0.79278				1	48	0.05218	30	0.879	0	43	28
InlVal	Fraxinus pennsylvanica 'Marshall'	FRPE_M	cdia	dbh	meters	1	loglogw1	1.76895	1.81547	0.04999			0.8	13.85	0.22359	30	0.827	2.5	50	28
InlVal	Fraxinus pennsylvanica 'Marshall'	FRPE_M	dbh	crown dia	meters	1/dbh	loglogw3	-0.81764	2.56316	0.00125			0.8	13.85	0.03532	30	0.978	0.8	16.5	28
InlVal	Fraxinus pennsylvanica 'Marshall'	FRPE_M	dbh	crown ht	meters	1/(dbh)^2	loglogw4	-0.73869	2.19769	7e-05			0.79	9.54	0.00819	30	0.986	0.8	13.5	28
InlVal	Fraxinus pennsylvanica 'Marshall'	FRPE_M	age	dbh	centimeters	1/age^2	quad	2.52274	1.72537	-0.01816			2.52	43.49	0.12676	30	0.929	2.5	50	27
InlVal	Fraxinus pennsylvanica 'Marshall'	FRPE_M	dbh	leaf area	sq. meters	1/sqrt(dbh)	loglogw2	-0.32643	4.57047	0.02998			2.12	353.67	0.17315	30	0.928	2.2	511.3	28
InlVal	Fraxinus pennsylvanica 'Marshall'	FRPE_M	dbh	tree ht	meters	1/(dbh)^2	loglogw4	0.32164	1.58718	3e-05			1.99	11.77	0.0053	30	0.989	2	16.5	28
InlVal	Fraxinus velutina 'Modesto'	FRVE_G	dbh	age	years	1/dbh^2	lin	-1.82361	0.73114				1	75	0.0203	30	0.955	0	80	28
InlVal	Fraxinus velutina 'Modesto'	FRVE_G	cdia	dbh	meters	1/(cdia)^2	loglogw4	1.78995	2.33977	0.00022			0.99	15.17	0.01476	30	0.996	2.5	90	28
InlVal	Fraxinus velutina 'Modesto'	FRVE_G	dbh	crown dia	meters	1/(dbh)^2	loglogw4	-0.51257	2.18667	1e-05			0.99	15.17	0.00305	30	0.995	1	19.4	28
InlVal	Fraxinus velutina 'Modesto'	FRVE_G	dbh	crown ht	meters	1/(dbh)^2	loglogw4	-0.76842	2.32508	2e-05			0.79	14.74	0.00421	30	0.992	0.8	20.5	28
InlVal	Fraxinus velutina 'Modesto'	FRVE_G	age	dbh	centimeters	1/age^2	quad	2.52059	1.94085	-0.01297			2.52	75.13	0.05391	30	0.971	2.5	90	27
InlVal	Fraxinus velutina 'Modesto'	FRVE_G	dbh	leaf area	sq. meters	1/dbh^2	loglogw4	-0.30095	4.44859	3e-05			2.06	550.56	0.00564	30	0.996	2.1	905.9	28
InlVal	Fraxinus velutina 'Modesto'	FRVE_G	dbh	tree ht	meters	1/dbh^2	lin	1.33557	0.26367				2	21.14	0.00233	30	0.96	2	24	28
InlVal	Ginkgo biloba	GIBI	dbh	age	years	1	cub	1.12019	1.82781	-0.03961	0.00034		0	67	16.4194	34	0.896	0	64	30
InlVal	Ginkgo biloba	GIBI	cdia	dbh	meters	1/cdia^2	quad	-0.01563	2.9815	0.17405			0.9	12.14	0.78584	34	0.937	2.5	78	31
InlVal	Ginkgo biloba	GIBI	dbh	crown dia	meters	1	loglogw1	-0.6057	2.10485	0.03312			0.9	12.14	0.18199	34	0.93	0.7	14	32
InlVal	Ginkgo biloba	GIBI	dbh	crown ht	meters	1/dbh	lin	1.45556	0.21001				1.98	17.51	0.13027	34	0.852	0.8	19	32
InlVal	Ginkgo biloba	GIBI	age	dbh	centimeters	1/age^2	cub	2.54104	-0.10418	0.0531	-0.00052		2.49	76.46	0.07015	34	0.921	2.5	78	30
InlVal	Ginkgo biloba	GIBI	dbh	leaf area	sq. meters	1	loglogw1	-0.89371	4.79939	0.2071			1.75	531.06	0.45508	34	0.917	0.9	682	32
InlVal	Ginkgo biloba	GIBI	dbh	tree ht	meters	1/dbh	cub	1.11408	0.53441	-0.00981	8e-05		2.38	21.29	0.10588	34	0.909	1.6	23	30
InlVal	Gleditsia triacanthos	GLTR	dbh	age	years	1/dbh^2	cub	-5.62522	2.34838	-0.05103	0.00038		1	65	0.00918	29	0.979	0	50	25
InlVal	Gleditsia triacanthos	GLTR	cdia	dbh	meters	1	loglogw1	1.56066	2.33518	0.02921			1.09	16.55	0.1709	29	0.914	2.5	80	27
InlVal	Gleditsia triacanthos	GLTR	dbh	crown dia	meters	1/dbh^2	loglogw4	-0.42231	2.20775	1e-05			1.09	16.55	0.0031	29	0.997	1.1	19	27
InlVal	Gleditsia triacanthos	GLTR	dbh	crown ht	meters	1/dbh^2	loglogw4	-0.90117	2.32262	5e-05			0.7	13.47	0.00723	29	0.983	0.7	17	27
InlVal	Gleditsia triacanthos	GLTR	age	dbh	centimeters	1/age^2	lin	2.5264	1.36037				2.53	70.55	0.10317	29	0.943	2.5	80	27
InlVal	Gleditsia triacanthos	GLTR	dbh	leaf area	sq. meters	1/dbh^2	loglogw4	-0.95928	4.86431	9e-05			1.18	563.77	0.00967	29	0.993	1.2	705	27
InlVal	Gleditsia triacanthos	GLTR	dbh	tree ht	meters	1/dbh^2	loglogw4	0.30463	1.6554	3e-05			1.99	16.17	0.00551	29	0.981	2	21	27
InlVal	Koelreuteria paniculata	KOPA	dbh	age	years	1/dbh	quad	-2.18852	1.34187	-0.00945			0	50	0.77278	31	0.932	0	50	28
InlVal	Koelreuteria paniculata	KOPA	cdia	dbh	meters	1/cdia^2	cub	2.86909	-1.32014	1.06867	-0.05215		1.19	11.74	0.3312	31	0.949	2.5	60	27
InlVal	Koelreuteria paniculata	KOPA	dbh	crown dia	meters	1	loglogw1	-0.30329	1.94526	0.02743			1.19	11.74	0.16562	31	0.95	0.9	14.8	29
InlVal	Koelreuteria paniculata	KOPA	dbh	crown ht	meters	1/sqrt(dbh)	lin	1.1246	0.17654				1.57	11.94	0.21463	31	0.909	1	11.5	29
InlVal	Koelreuteria paniculata	KOPA	age	dbh	centimeters	1/age^2	quad	2.53372	0.62574	0.01098			2.53	61.28	0.08669	31	0.886	2.5	60	28
InlVal	Koelreuteria paniculata	KOPA	dbh	leaf area	sq. meters	1/dbh^2	quad	-4.08866	2.1834	0.06252			1.84	364.45	1.54048	31	0.858	1.6	290	28
InlVal	Koelreuteria paniculata	KOPA	dbh	tree ht	meters	1/sqrt(dbh)	quad	2.1107	0.29037	-0.00151			2.84	14.23	0.14424	31	0.956	1.8	14	28
InlVal	Lagerstroemia indica	LAIN	dbh	age	years	1/sqrt(dbh)	cub	-9.44372	5.3451	-0.22305	0.00349		0	84	14.5768	28	0.764	0	52	24
InlVal	Lagerstroemia indica	LAIN	cdia	dbh	meters	1/cdia^2	lin	-0.48667	3.44952				1.21	7.21	1.08096	28	0.801	2.5	35.2	26
InlVal	Lagerstroemia indica	LAIN	dbh	crown dia	meters	1	loglogw1	-0.27841	1.74771	0.0854			1.21	7.21	0.29223	28	0.74	0.7	7.1	26
InlVal	Lagerstroemia indica	LAIN	dbh	crown ht	meters	1	quad	0.21994	0.28457	-0.00356			0.92	5.82	0.34081	28	0.853	0.7	6	25
InlVal	Lagerstroemia indica	LAIN	age	dbh	centimeters	1/age^2	lin	2.53611	0.38823				2.54	35.15	0.03464	28	0.8	2.5	35.2	26
InlVal	Lagerstroemia indica	LAIN	dbh	leaf area	sq. meters	1	loglogw1	-0.75006	4.13711	0.43466			2.39	118.91	0.65928	28	0.758	0.6	114.6	26
InlVal	Lagerstroemia indica	LAIN	dbh	tree ht	meters	1	quad	1.78206	0.28887	-0.00349			2.49	7.63	0.13807	28	0.372	2.1	7.8	25
InlVal	Liquidambar styraciflua	LIST	dbh	age	years	1	cub	-0.69703	1.44307	-0.02099	0.00012		0	65	26.2801	32	0.846	0	80	28
InlVal	Liquidambar styraciflua	LIST	cdia	dbh	meters	1/sqrt(cdia)	cub	-12.9873	15.6914	-2.11419	0.10852		1.17	13.66	16.2737	32	0.902	2.5	120	28
InlVal	Liquidambar styraciflua	LIST	dbh	crown dia	meters	1	quad	0.54299	0.25182	-0.0011			1.17	13.66	1.61601	32	0.834	1	15	29
InlVal	Liquidambar styraciflua	LIST	dbh	crown ht	meters	1/sqrt(dbh)	lin	2.61875	0.23213				3.21	21.24	1.13097	32	0.789	1.5	28.5	30
InlVal	Liquidambar styraciflua	LIST	age	dbh	centimeters	1/age^2	lin	2.52804	1.19535				2.53	80.23	0.11043	32	0.924	2.5	120	30
InlVal	Liquidambar styraciflua	LIST	dbh	leaf area	sq. meters	1	loglogw1	-0.53587	4.69271	0.2306			2.62	689.1	0.48021	32	0.819	3.3	1123	30
InlVal	Liquidambar styraciflua	LIST	dbh	tree ht	meters	1	lin	4.09398	0.26345				4.76	25.23	5.53195	32	0.866	2.2	34	30
InlVal	Magnolia grandiflora	MAGR	dbh	age	years	1/sqrt(dbh)	cub	-8.74189	3.27266	-0.08623	0.00082		0	68	7.33925	31	0.784	0	60	27
InlVal	Magnolia grandiflora	MAGR	cdia	dbh	meters	1/sqrt(cdia)	loglogw2	1.78714	2.08033	0.02519			0.89	10.33	0.15871	31	0.887	2.5	62.7	29
InlVal	Magnolia grandiflora	MAGR	dbh	crown dia	meters	1	loglogw1	-0.63917	2.12796	0.03369			0.89	10.33	0.18356	31	0.852	0.9	11.5	29
InlVal	Magnolia grandiflora	MAGR	dbh	crown ht	meters	1/dbh^2	lin	0.46353	0.23176				1.05	13.25	0.00328	31	0.901	1	12.5	29
InlVal	Magnolia grandiflora	MAGR	age	dbh	centimeters	1/age^2	lin	2.53226	0.77382				2.53	55.15	0.05679	31	0.908	2.5	62.7	29
InlVal	Magnolia grandiflora	MAGR	dbh	leaf area	sq. meters	1/dbh^2	cub	4.96731	-1.17143	0.25187	-0.00268		3.57	257.22	1.64597	31	0.839	3.1	321.6	27
InlVal	Magnolia grandiflora	MAGR	dbh	tree ht	meters	1/dbh^2	quad	0.90103	0.36683	-0.00225			1.82	14.28	0.00367	31	0.927	1.8	15	28
InlVal	Pistacia chinensis	PICH	dbh	age	years	1	cub	-13.1194	3.09973	-0.08335	0.00083		1	76	39.3618	32	0.77	0	62	28
InlVal	Pistacia chinensis	PICH	cdia	dbh	meters	1	loglogw1	1.05961	2.65873	0.05352			1.3	14.67	0.23135	32	0.879	2.5	65	30
InlVal	Pistacia chinensis	PICH	dbh	crown dia	meters	1/dbh^2	loglogw4	-0.21871	2.06709	3e-05			1.3	14.67	0.00538	32	0.993	1.3	19	30
InlVal	Pistacia chinensis	PICH	dbh	crown ht	meters	1/dbh	loglogw3	-0.47433	2.02036	0.00308			1	11.1	0.05554	32	0.917	1	14	30
InlVal	Pistacia chinensis	PICH	age	dbh	centimeters	1/age^2	quad	2.52667	1.334	-0.00875			2.53	53.36	0.10888	32	0.91	2.5	65	29
InlVal	Pistacia chinensis	PICH	dbh	leaf area	sq. meters	1/sqrt(dbh)	loglogw2	-1.33991	5.34684	0.02976			0.92	480.68	0.17251	32	0.953	1.2	666.5	30
InlVal	Pistacia chinensis	PICH	dbh	tree ht	meters	1/dbh	loglogw3	0.18697	1.74546	0.00145			1.81	14.06	0.03809	32	0.946	1.8	16.5	30
InlVal	Pinus thunbergiana	PITH	dbh	age	years	1/dbh^2	loglogw4	-6.39979	7.65926	9e-05			0	61	0.00925	28	0.998	0	55	26
InlVal	Pinus thunbergiana	PITH	cdia	dbh	meters	1/cdia^2	quad	-13.2293	9.51363	-0.41552			1.79	9.28	0.26181	28	0.96	2.5	50	25
InlVal	Pinus thunbergiana	PITH	dbh	crown dia	meters	1/dbh^2	lin	1.29056	0.19814				1.79	9.28	0.00138	28	0.952	1.8	12.3	26
InlVal	Pinus thunbergiana	PITH	dbh	crown ht	meters	1/dbh^2	quad	1.55318	-0.03801	0.00591			1.49	9.62	0.00777	28	0.763	1	16.5	25
InlVal	Pinus thunbergiana	PITH	age	dbh	centimeters	1/age^2	cub	2.51167	2.83381	-0.07872	0.00074		2.51	40.32	0.02289	28	0.983	2.5	50	24
InlVal	Pinus thunbergiana	PITH	dbh	leaf area	sq. meters	1/dbh^2	loglogw4	0.34408	3.35292	0.00016			3.03	131.58	0.01263	28	0.981	3.1	210	26
InlVal	Pinus thunbergiana	PITH	dbh	tree ht	meters	1/dbh^2	expow4	0.26305	0.05754	7e-05			1.5	14	0.00858	28	0.969	1.5	19	26
InlVal	Platanus x acerifolia	PLAC	dbh	age	years	1	loglogw1	-4.94235	6.26322	0.3516			0	94	0.59296	29	0.866	0	90	27
InlVal	Platanus x acerifolia	PLAC	cdia	dbh	meters	1	loglogw1	1.21639	2.63365	0.05717			1.41	15.44	0.23911	29	0.888	2.5	70	27
InlVal	Platanus x acerifolia	PLAC	dbh	crown dia	meters	1/dbh^2	quad	0.41317	0.36991	-0.00179			1.41	15.44	0.00304	29	0.946	1.3	25	26
InlVal	Platanus x acerifolia	PLAC	dbh	crown ht	meters	1	loglogw1	-0.32476	2.07239	0.05105			1.34	13.19	0.22594	29	0.83	1.5	21	27
InlVal	Platanus x acerifolia	PLAC	age	dbh	centimeters	1/sqrt(age)	cub	2.74346	2.76313	-0.04948	0.0003		2.74	55.57	16.9542	29	0.899	2.5	70	25
InlVal	Platanus x acerifolia	PLAC	dbh	leaf area	sq. meters	1	loglogw1	-0.08181	4.31097	0.1981			4.17	418.67	0.44509	29	0.845	5.2	704.2	27
InlVal	Platanus x acerifolia	PLAC	dbh	tree ht	meters	1/dbh^2	quad	0.90077	0.47286	-0.00307			2.17	17.7	0.00617	29	0.921	2.1	25.5	26
InlVal	Prunus cerasifera	PRCE	dbh	age	years	1	cub	-22.6046	8.80482	-0.43848	0.0066		0	29	101.357	29	0.347	0	55	25
InlVal	Prunus cerasifera	PRCE	cdia	dbh	meters	1	lin	11.3836	1.89391				4.23	6.5	42.2576	29	0.322	2.5	40	27
InlVal	Prunus cerasifera	PRCE	dbh	crown dia	meters	1	lin	1.9355	0.18265				4.23	6.5	4.07533	29	0.322	1.5	10.2	27
InlVal	Prunus cerasifera	PRCE	dbh	crown ht	meters	1	expow1	0.52862	0.03307	0.12468			2.73	4.13	0.3531	29	0.338	1.2	7	27
InlVal	Prunus cerasifera	PRCE	age	dbh	centimeters	1/age	loglogw3	2.66607	0.37611	0.00299			12.55	25.01	0.05469	29	0.983	2.5	40	27
InlVal	Prunus cerasifera	PRCE	dbh	leaf area	sq. meters	1	lin	-22.2935	4.16119				29.93	157.19	1358.77	29	0.431	1.8	155	27
InlVal	Prunus cerasifera	PRCE	dbh	tree ht	meters	1	loglogw1	0.33285	1.21438	0.07511			4.54	7.18	0.27406	29	0.388	1.8	8.5	27
InlVal	Pyrus calleryana 'Bradford'	PYCA_B	dbh	age	years	1/dbh^2	quad	-3.70322	1.44495	-0.01466			0	41	0.10494	30	0.825	0	50	27
InlVal	Pyrus calleryana 'Bradford'	PYCA_B	cdia	dbh	meters	1	loglogw1	1.17774	2.76068	0.04889			1.43	10.44	0.22111	30	0.871	2.5	57.8	28
InlVal	Pyrus calleryana 'Bradford'	PYCA_B	dbh	crown dia	meters	1/dbh	quad	0.50675	0.37595	-0.00322			1.43	10.44	0.04291	30	0.925	1.6	14.2	27
InlVal	Pyrus calleryana 'Bradford'	PYCA_B	dbh	crown ht	meters	1	loglogw1	-0.06348	1.70999	0.02712			1.42	8.94	0.16467	30	0.835	1.5	12.5	28
InlVal	Pyrus calleryana 'Bradford'	PYCA_B	age	dbh	centimeters	1/age^2	quad	2.52151	1.84816	-0.02253			2.52	40.43	0.20741	30	0.881	2.5	57.8	27
InlVal	Pyrus calleryana 'Bradford'	PYCA_B	dbh	leaf area	sq. meters	1	loglogw1	-0.19883	4.22552	0.13472			2.7	228.75	0.36704	30	0.862	2.8	359.1	28
InlVal	Pyrus calleryana 'Bradford'	PYCA_B	dbh	tree ht	meters	1	loglogw1	0.38587	1.57356	0.01055			2.13	11.67	0.10273	30	0.917	2	15	28
InlVal	Quercus ilex	QUIL2	dbh	age	years	1/dbh^2	cub	-4.06797	1.68277	-0.03122	0.00024		0	80	0.0076	30	0.98	0	55	26
InlVal	Quercus ilex	QUIL2	cdia	dbh	meters	1/cdia^2	loglogw4	1.76763	2.27887	0.00016			1	16.9	0.01274	30	0.997	2.5	80	28
InlVal	Quercus ilex	QUIL2	dbh	crown dia	meters	1/dbh^2	quad	0.25925	0.29474	-0.0013			1	16.9	0.00073	30	0.982	1	16	27
InlVal	Quercus ilex	QUIL2	dbh	crown ht	meters	1/dbh^2	loglogw4	-0.48554	2.07016	3e-05			0.99	19.66	0.00591	30	0.985	1	21	28
InlVal	Quercus ilex	QUIL2	age	dbh	centimeters	1/age^2	lin	2.52584	1.41611				2.53	115.81	0.0489	30	0.974	2.5	80	28
InlVal	Quercus ilex	QUIL2	dbh	leaf area	sq. meters	1/dbh^2	quad	-0.14576	0.51326	0.10986			1.85	1532.81	2.85609	30	0.907	1.9	660	27
InlVal	Quercus ilex	QUIL2	dbh	tree ht	meters	1/dbh^2	loglogw4	0.30663	1.64757	2e-05			1.99	20.68	0.00476	30	0.984	2	24.5	28
InlVal	Washingtonia robusta	WARO	dbh	crown dia	meters	1/ht	quad	0.09678	0.411	-0.00834			0.35	5.12				2.5	5.9
InlVal	Washingtonia robusta	WARO	dbh	crown ht	meters	1/ht	quad	0.115	0.433	-0.0094			0.38	5.1				1.5	5
InlVal	Washingtonia robusta	WARO	dbh	leaf area	sq. meters	1/ht	cub	0.116	0.09026	0.22	-0.00547		0.26	51.04				0.9	27.9
InlVal	Washingtonia robusta	WARO	dbh	tree ht	meters	1/age	quart	-0.163	0.783	0.00079	-0.00015	9.06e-07	0.62	30.53				8	30
InlVal	Zelkova serrata	ZESE	dbh	age	years	1/dbh	lin	-1.28441	0.71861				0	60	0.92302	33	0.895	0	60	31
InlVal	Zelkova serrata	ZESE	cdia	dbh	meters	1/cdia	lin	-3.25638	3.39504				1.11	24.14	2.88818	33	0.934	2.5	75	31
InlVal	Zelkova serrata	ZESE	dbh	crown dia	meters	1/dbh	cub	-0.40972	0.63459	-0.01242	0.00011		1.11	24.14	0.05217	33	0.958	1.2	24.2	29
InlVal	Zelkova serrata	ZESE	dbh	crown ht	meters	1	loglogw1	-0.72639	2.21264	0.11736			0.89	12.95	0.34257	33	0.737	1	16.5	31
InlVal	Zelkova serrata	ZESE	age	dbh	centimeters	1/age^2	quad	2.52361	1.63788	-0.00855			2.52	77.25	0.14215	33	0.929	2.5	75	30
InlVal	Zelkova serrata	ZESE	dbh	leaf area	sq. meters	1	loglogw1	-1.03018	5.14416	0.11023			1.46	741.67	0.33201	33	0.942	1.8	940	31
InlVal	Zelkova serrata	ZESE	dbh	tree ht	meters	1	loglogw1	0.28434	1.67177	0.04773			2.02	15.72	0.21848	33	0.798	2	20	31
InterW	Chilopsis linearis	CHLI	dbh	age	years	1	expow1	1.1441	0.06862	0.15215			0	40	0.39006	30	0.608	3	23	28
InterW	Chilopsis linearis	CHLI	cdia	dbh	meters	1	loglogw1	1.29849	2.66746	0.0562			4.3	41.49	0.23706	30	0.797	2.8	35.6	28
InterW	Chilopsis linearis	CHLI	dbh	crown dia	meters	1/dbh^2	lin	1.21982	0.2111				2.13	9.98	0.00201	30	0.856	1.8	8.6	28
InterW	Chilopsis linearis	CHLI	dbh	crown ht	meters	1	loglogw1	-0.08544	1.14037	0.09229			1.7	4.2	0.30379	30	0.344	1	5	28
InterW	Chilopsis linearis	CHLI	age	dbh	centimeters	1/age	lin	4.29705	0.92975				4.3	41.49	1.75474	30	0.59	2.8	35.6	28
InterW	Chilopsis linearis	CHLI	dbh	leaf area	sq. meters	1	loglogw1	-5.04429	6.15051	0.5091			0.36	28.38	0.71351	29	0.669	0.1	22.1	27
InterW	Chilopsis linearis	CHLI	dbh	tree ht	meters	1	expow1	0.86018	0.03567	0.0631			2.84	10.71	0.2512	30	0.499	1.6	8	28
InterW	Elaeagnus angustifolia	ELAN	dbh	age	years	1/dbh	cub	-9.14599	1.9997	-0.03907	0.00025		0	85	1.22737	30	0.719	3	39	26
InterW	Elaeagnus angustifolia	ELAN	cdia	dbh	meters	1/cdia^2	lin	-8.29681	4.91511				4.3	80.63	0.48956	30	0.906	5.2	80.8	28
InterW	Elaeagnus angustifolia	ELAN	dbh	crown dia	meters	1/sqrt(dbh)	lin	2.39569	0.18355				2.7	17.22	0.25898	30	0.896	3.1	17	28
InterW	Elaeagnus angustifolia	ELAN	dbh	crown ht	meters	1/dbh	lin	2.17419	0.11933				2.37	11.81	0.04081	30	0.813	2.5	13	28
InterW	Elaeagnus angustifolia	ELAN	age	dbh	centimeters	1/sqrt(age)	loglogw2	1.23943	2.09658	0.03678			1.63	80.74	0.19177	30	0.765	5.2	80.8	28
InterW	Elaeagnus angustifolia	ELAN	dbh	leaf area	sq. meters	1	loglogw1	-5.98684	7.98921	0.38714			0.36	492.85	0.62221	30	0.874	1.1	503.7	28
InterW	Elaeagnus angustifolia	ELAN	dbh	tree ht	meters	1	loglogw1	-0.14852	1.7873	0.01978			0.83	12.24	0.14063	30	0.872	3	15	28
InterW	Fraxinus americana	FRAM	dbh	age	years	1	quad	-3.49631	1.18005	-0.01051			1	50	9.98713	28	0.836	3	34	25
InterW	Fraxinus americana	FRAM	cdia	dbh	meters	1/cdia^2	lin	0.60599	3.43547				2.44	75.76	0.31084	28	0.936	5.1	68.1	26
InterW	Fraxinus americana	FRAM	dbh	crown dia	meters	1/dbh^2	lin	0.12373	0.28514				0.82	21.73	0.00201	28	0.942	1.8	19.1	26
InterW	Fraxinus americana	FRAM	dbh	crown ht	meters	1/dbh^2	lin	1.32139	0.19768				1.8	16.3	0.00281	28	0.847	2.5	15.5	26
InterW	Fraxinus americana	FRAM	age	dbh	centimeters	1/age^2	lin	0.94594	1.49623				2.44	75.76	0.15789	28	0.87	5.1	68.1	26
InterW	Fraxinus americana	FRAM	dbh	leaf area	sq. meters	1/sqrt(dbh)	loglogw2	-8.41657	10.2181	0.10871			0.14	789.71	0.32971	27	0.903	0.2	786.5	25
InterW	Fraxinus americana	FRAM	dbh	tree ht	meters	1/dbh^2	lin	3.47196	0.19495				3.95	18.24	0.003	28	0.834	4.5	17	26
InterW	Fraxinus angustifolia	FRAN2	dbh	age	years	1	loglogw1	-1.6051	3.80614	0.18296			1	67	0.42773	30	0.794	2	55	28
InterW	Fraxinus angustifolia	FRAN2	cdia	dbh	meters	1/cdia^2	cub	4.60275	-0.77387	1.03775	-0.05442		5.19	51.39	0.36071	30	0.929	5.1	64.5	26
InterW	Fraxinus angustifolia	FRAN2	dbh	crown dia	meters	1/dbh	lin	0.79199	0.20969				1.58	11.57	0.02824	30	0.925	1.2	12.3	28
InterW	Fraxinus angustifolia	FRAN2	dbh	crown ht	meters	1/dbh	quad	0.36305	0.3137	-0.0028			1.51	9.08	0.0291	30	0.891	1.1	10.5	27
InterW	Fraxinus angustifolia	FRAN2	age	dbh	centimeters	1/age	quad	3.77994	1.42036	-0.01059			3.78	51.39	2.64279	30	0.773	5.1	64.5	27
InterW	Fraxinus angustifolia	FRAN2	dbh	leaf area	sq. meters	1	loglogw1	-7.85173	9.7102	0.29966			0.29	354.1	0.54741	30	0.939	0.1	397.2	28
InterW	Fraxinus angustifolia	FRAN2	dbh	tree ht	meters	1	loglogw1	0.34217	1.51148	0.01088			2.78	11.29	0.10431	30	0.911	2.7	12.5	28
InterW	Fraxinus pennsylvanica	FRPE	dbh	age	years	1/dbh	cub	4.94208	-0.35291	0.05768	-0.00069		1	60	0.98388	31	0.902	3	58	27
InterW	Fraxinus pennsylvanica	FRPE	cdia	dbh	meters	1	loglogw1	1.73505	2.10649	0.05769			3.57	70.61	0.24019	31	0.898	5.1	65.8	29
InterW	Fraxinus pennsylvanica	FRPE	dbh	crown dia	meters	1/dbh^2	cub	-1.79996	0.65677	-0.014	0.00013		0.37	21.52	0.0019	31	0.946	1.3	20.2	27
InterW	Fraxinus pennsylvanica	FRPE	dbh	crown ht	meters	1/dbh	lin	2.37741	0.16325				2.78	13.91	0.08895	31	0.798	2	14	29
InterW	Fraxinus pennsylvanica	FRPE	age	dbh	centimeters	1/age^2	lin	2.43636	1.13626				2.44	70.61	0.10217	31	0.874	5.1	65.8	29
InterW	Fraxinus pennsylvanica	FRPE	dbh	leaf area	sq. meters	1/sqrt(dbh)	loglogw2	-7.41389	9.58687	0.0896			0.14	974.4	0.29933	30	0.936	0.2	1142.1	28
InterW	Fraxinus pennsylvanica	FRPE	dbh	tree ht	meters	1/dbh	lin	3.64876	0.19161				4.12	17.18	0.09239	31	0.84	4	17	29
InterW	Fraxinus velutina	FRVE	dbh	age	years	1/sqrt(dbh)	quad	-4.26425	1.29921	-0.00945			0	52	4.08263	65	0.91	2	46	62
InterW	Fraxinus velutina	FRVE	cdia	dbh	meters	1/cdia^2	cub	2.4018	1.13515	0.3295	-0.01045		4.61	65.67	0.38022	65	0.943	4.3	78.7	61
InterW	Fraxinus velutina	FRVE	dbh	crown dia	meters	1/dbh	quad	0.25201	0.34447	-0.0015			1.81	16.42	0.05398	65	0.954	1.8	22.1	62
InterW	Fraxinus velutina	FRVE	dbh	crown ht	meters	1/dbh^2	cub	2.82011	0.01849	0.00599	-6e-05		3.03	13.38	0.00183	65	0.886	2.6	18	61
InterW	Fraxinus velutina	FRVE	age	dbh	centimeters	1/age^2	cub	4.61345	0.39975	0.05339	-0.00074		4.61	65.67	0.12717	65	0.898	4.3	78.7	61
InterW	Fraxinus velutina	FRVE	dbh	leaf area	sq. meters	1	loglogw1	-6.93084	9.36004	0.32139			0.37	946.12	0.56691	65	0.949	0.3	1601.4	63
InterW	Fraxinus velutina	FRVE	dbh	tree ht	meters	1/dbh^2	lin	3.37494	0.19932				4.29	16.46	0.00177	65	0.919	4	22	63
InterW	Gleditsia triacanthos	GLTR	dbh	age	years	1/sqrt(dbh)	quad	-0.83991	1.00937	-0.0037			0	57	5.22749	68	0.881	2	49	65
InterW	Gleditsia triacanthos	GLTR	cdia	dbh	meters	1/cdia^2	cub	9.08715	-3.42635	1.03402	-0.03964		2.72	66.08	0.46358	68	0.924	4.8	66.8	64
InterW	Gleditsia triacanthos	GLTR	dbh	crown dia	meters	1/dbh	cub	-0.72835	0.58463	-0.01157	0.0001		0.78	16.19	0.05651	68	0.92	1.2	17.1	64
InterW	Gleditsia triacanthos	GLTR	dbh	crown ht	meters	1/dbh^2	lin	1.33382	0.17278				1.8	12.75	0.00268	68	0.832	1.9	18	66
InterW	Gleditsia triacanthos	GLTR	age	dbh	centimeters	1/sqrt(age)	lin	2.71672	1.11169				2.72	66.08	8.56222	68	0.886	4.8	66.8	66
InterW	Gleditsia triacanthos	GLTR	dbh	leaf area	sq. meters	1	loglogw1	-6.57356	8.70487	0.45562			0.24	595.92	0.675	67	0.894	0.2	1093.6	65
InterW	Gleditsia triacanthos	GLTR	dbh	tree ht	meters	1/dbh^2	lin	2.51844	0.21563				3.1	16.77	0.00278	68	0.882	3	20	66
InterW	Koelreuteria paniculata	KOPA	dbh	age	years	1/dbh^2	cub	16.0239	-2.55707	0.18609	-0.00259		1	63	0.02343	28	0.933	6	47	24
InterW	Koelreuteria paniculata	KOPA	cdia	dbh	meters	1/cdia	quad	5.13249	0.53409	0.36383			6.86	50.51	0.83062	28	0.954	6.6	45.5	25
InterW	Koelreuteria paniculata	KOPA	dbh	crown dia	meters	1	quad	-0.00913	0.34408	-0.00301			1.99	9.69	0.20642	28	0.952	2.2	9.6	25
InterW	Koelreuteria paniculata	KOPA	dbh	crown ht	meters	1/sqrt(dbh)	loglogw2	-1.19416	2.26121	0.00491			1.41	6.85	0.0701	28	0.875	1.5	7	26
InterW	Koelreuteria paniculata	KOPA	age	dbh	centimeters	1/age	lin	6.15527	0.704				6.16	50.51	0.54466	28	0.89	6.6	45.5	26
InterW	Koelreuteria paniculata	KOPA	dbh	leaf area	sq. meters	1	loglogw1	-8.09717	9.3812	0.21873			0.29	133.74	0.46769	28	0.916	0.2	128.1	26
InterW	Koelreuteria paniculata	KOPA	dbh	tree ht	meters	1/sqrt(dbh)	lin	3.08556	0.12147				3.83	9.22	0.0645	28	0.839	3.5	9	26
InterW	Malus spp.	MA2	dbh	age	years	1/dbh	quad	-6.99208	2.21813	-0.02847			1	57	1.84524	30	0.748	3	46	27
InterW	Malus spp.	MA2	cdia	dbh	meters	1/sqrt(cdia)	lin	-3.52053	4.39611				4.26	45.2	7.375	30	0.823	6.4	43.7	28
InterW	Malus spp.	MA2	dbh	crown dia	meters	1	lin	1.81403	0.18388				2.6	10.13	0.73876	30	0.813	2.2	9.6	28
InterW	Malus spp.	MA2	dbh	crown ht	meters	1/dbh	lin	1.47683	0.09231				1.87	5.65	0.03083	30	0.579	1.5	6	28
InterW	Malus spp.	MA2	age	dbh	centimeters	1/age^2	lin	4.26106	0.71828				4.26	45.2	0.06462	30	0.823	6.4	43.7	28
InterW	Malus spp.	MA2	dbh	leaf area	sq. meters	1	loglogw1	-7.24117	8.50438	0.58225			0.21	122.54	0.76305	30	0.772	0.4	140.8	28
InterW	Malus spp.	MA2	dbh	tree ht	meters	1/dbh	lin	2.19134	0.12475				2.72	7.83	0.02351	30	0.77	2.8	8	28
InterW	Pistacia chinensis	PICH	dbh	age	years	1/dbh^2	quad	3.48093	0.25921	0.0264			0	46	0.11545	30	0.64	2	55	27
InterW	Pistacia chinensis	PICH	cdia	dbh	meters	1/cdia	lin	-0.42389	3.2908				6.06	34.14	1.73845	31	0.845	4.8	37.6	29
InterW	Pistacia chinensis	PICH	dbh	crown dia	meters	1/dbh	lin	0.73437	0.2626				2.29	9.52	0.04302	30	0.845	1.7	11	28
InterW	Pistacia chinensis	PICH	dbh	crown ht	meters	1	lin	1.63794	0.1467				2.51	6.54	0.48153	30	0.733	2	7.5	28
InterW	Pistacia chinensis	PICH	age	dbh	centimeters	1/sqrt(age)	lin	5.9158	0.59831				5.92	33.44	4.22086	30	0.692	4.8	37.6	28
InterW	Pistacia chinensis	PICH	dbh	leaf area	sq. meters	1/sqrt(dbh)	loglogw2	-6.09868	7.86776	0.1162			0.46	65.45	0.34088	30	0.852	0.2	147.9	28
InterW	Pistacia chinensis	PICH	dbh	tree ht	meters	1/dbh	cub	5.12258	-0.30206	0.02897	-0.00048		4.25	9.44	0.0283	30	0.752	3.6	10	26
InterW	Pinus edulis	PIED	dbh	age	years	1	cub	27.2426	-4.34769	0.32743	-0.00541		0	57	33.312	29	0.833	2	50	25
InterW	Pinus edulis	PIED	cdia	dbh	meters	1/cdia	lin	-2.55063	5.57049				5.01	36.78	3.02596	29	0.872	5.1	37.8	27
InterW	Pinus edulis	PIED	dbh	crown dia	meters	1/sqrt(dbh)	lin	0.90455	0.15673				1.69	6.67	0.07717	29	0.876	1.6	7.2	27
InterW	Pinus edulis	PIED	dbh	crown ht	meters	1/sqrt(dbh)	expow2	0.61312	0.03283	0.01321			2.21	6.43	0.11494	29	0.641	1.8	9.5	27
InterW	Pinus edulis	PIED	age	dbh	centimeters	1/sqrt(age)	lin	5.01376	0.55731				5.01	36.78	4.9158	29	0.758	5.1	37.8	27
InterW	Pinus edulis	PIED	dbh	leaf area	sq. meters	1/dbh	expow3	-2.00792	0.15525	0.02028			0.31	58.86	0.1424	27	0.837	0.3	39.9	25
InterW	Pinus edulis	PIED	dbh	tree ht	meters	1	loglogw1	-0.49939	1.87286	0.06534			1.88	6.91	0.25561	29	0.653	1.9	11	27
InterW	Pinus nigra	PINI	dbh	age	years	1/dbh	lin	2.23911	0.44816				1	50	0.46599	28	0.829	3	30	26
InterW	Pinus nigra	PINI	cdia	dbh	meters	1/cdia^2	lin	-2.8448	5.51688				0.71	78.99	0.95794	28	0.912	4.1	74.2	26
InterW	Pinus nigra	PINI	dbh	crown dia	meters	1	loglogw1	-1.08162	2.36706	0.0302			0.1	11.21	0.17377	28	0.892	1.2	12.8	26
InterW	Pinus nigra	PINI	dbh	crown ht	meters	1/dbh	lin	1.96814	0.14712				2.09	13.43	0.0555	28	0.814	2.4	12.5	26
InterW	Pinus nigra	PINI	age	dbh	centimeters	1	loglogw1	0.60678	2.7169	0.0857			0.8	77.94	0.29274	28	0.803	4.1	74.2	26
InterW	Pinus nigra	PINI	dbh	leaf area	sq. meters	1	loglogw1	-6.77785	8.18821	0.561			0.05	269.12	0.749	27	0.846	0.2	251.4	25
InterW	Pinus nigra	PINI	dbh	tree ht	meters	1/dbh	lin	1.98994	0.17511				2.13	15.64	0.06446	28	0.843	2.5	15.5	26
InterW	Pinus ponderosa	PIPO	dbh	age	years	1/dbh	cub	-10.9037	2.59125	-0.06418	0.00057		1	42	0.56191	30	0.842	5	41	26
InterW	Pinus ponderosa	PIPO	cdia	dbh	meters	1/cdia	lin	-0.07413	5.07293				1.58	61.18	3.25562	30	0.928	7.6	66	28
InterW	Pinus ponderosa	PIPO	dbh	crown dia	meters	1/dbh	cub	2.56824	-0.11419	0.0106	-0.00011		2.24	11.17	0.01833	30	0.943	2	12	26
InterW	Pinus ponderosa	PIPO	dbh	crown ht	meters	1/dbh	lin	-0.0443	0.1963				0.27	11.97	0.05702	30	0.867	1	16	28
InterW	Pinus ponderosa	PIPO	age	dbh	centimeters	1/sqrt(age)	lin	0.13106	1.45354				1.58	61.18	13.3367	30	0.766	7.6	66	28
InterW	Pinus ponderosa	PIPO	dbh	leaf area	sq. meters	1	loglogw1	-11.6094	12.068	0.29567			0.06	376.46	0.54376	28	0.932	0.1	369.6	26
InterW	Pinus ponderosa	PIPO	dbh	tree ht	meters	1/dbh^2	lin	0.84099	0.21217				1.18	13.82	0.00175	30	0.901	2.5	17	28
InterW	Pinus sylvestris	PISY	dbh	age	years	1/dbh^2	cub	-1.16246	2.02994	-0.06262	0.0008		0	56	0.04078	30	0.814	11	55	26
InterW	Pinus sylvestris	PISY	cdia	dbh	meters	1/cdia^2	cub	8.31869	-2.76916	1.45794	-0.07629		6.79	56.55	0.40796	30	0.95	7.6	60.2	26
InterW	Pinus sylvestris	PISY	dbh	crown dia	meters	1	loglogw1	-1.34267	2.62192	0.01422			1.74	10.29	0.11926	30	0.944	1.6	10.8	28
InterW	Pinus sylvestris	PISY	dbh	crown ht	meters	1/sqrt(dbh)	quad	1.18045	0.24205	-0.0026			2.7	6.82	0.2225	30	0.641	1.5	8.5	27
InterW	Pinus sylvestris	PISY	age	dbh	centimeters	1	lin	6.79183	0.88852				6.79	56.55	54.8283	30	0.749	7.6	60.2	28
InterW	Pinus sylvestris	PISY	dbh	leaf area	sq. meters	1	loglogw1	-7.95696	8.99742	0.4257			0.55	163.09	0.65246	30	0.869	0.1	147.4	28
InterW	Pinus sylvestris	PISY	dbh	tree ht	meters	1	loglogw1	0.21342	1.38995	0.03472			3.4	8.71	0.18634	30	0.657	2.5	10	28
InterW	Platanus x acerifolia	PLAC	dbh	age	years	1/dbh	lin	0.42428	0.67149				1	60	0.98048	70	0.869	2	45	68
InterW	Platanus x acerifolia	PLAC	cdia	dbh	meters	1/cdia	cub	3.56928	1.1666	0.27119	-0.00808		2.68	69.39	2.19706	70	0.956	4.6	78	66
InterW	Platanus x acerifolia	PLAC	dbh	crown dia	meters	1/dbh	quad	0.00728	0.34279	-0.0013			0.92	17.52	0.04516	70	0.958	0.8	20.4	67
InterW	Platanus x acerifolia	PLAC	dbh	crown ht	meters	1/dbh	cub	2.64703	0.04565	0.00698	-7e-05		2.82	15.99	0.09259	70	0.887	2	19	66
InterW	Platanus x acerifolia	PLAC	age	dbh	centimeters	1/age	quad	0.97695	1.71132	-0.00952			2.68	69.39	3.10658	70	0.866	4.6	78	67
InterW	Platanus x acerifolia	PLAC	dbh	leaf area	sq. meters	1	loglogw1	-8.42342	10.6264	0.39152			0.73	1703.1	0.62571	67	0.945	0.1	1940.2	65
InterW	Platanus x acerifolia	PLAC	dbh	tree ht	meters	1/dbh	cub	3.66425	0.14989	0.00523	-6e-05		4.1	18.8	0.10222	70	0.902	3.5	23	66
InterW	Populus angustifolia	POAN	dbh	age	years	1/dbh	cub	-2.19917	0.95233	-0.01093	6e-05		1	57	1.0541	69	0.811	1	80	65
InterW	Populus angustifolia	POAN	cdia	dbh	meters	1	loglogw1	1.53325	2.55306	0.08621			2.97	96.03	0.29362	69	0.873	4.6	111	67
InterW	Populus angustifolia	POAN	dbh	crown dia	meters	1/dbh	cub	-0.82836	0.46525	-0.00469	2e-05		0.51	17.56	0.08357	69	0.924	1.4	20.4	65
InterW	Populus angustifolia	POAN	dbh	crown ht	meters	1/sqrt(dbh)	quad	1.23146	0.27021	-0.00141			2.02	14.13	0.50171	66	0.856	1.2	18	63
InterW	Populus angustifolia	POAN	age	dbh	centimeters	1/age	quad	0.30296	2.68255	-0.0176			2.97	96.03	11.368	69	0.813	4.6	111	66
InterW	Populus angustifolia	POAN	dbh	leaf area	sq. meters	1	loglogw1	-7.531	9.64034	0.54573			0.07	1853.96	0.73874	68	0.913	0.2	1844.6	66
InterW	Populus angustifolia	POAN	dbh	tree ht	meters	1/sqrt(dbh)	quad	2.42731	0.29777	-0.00133			3.3	18.71	0.60085	66	0.882	2.5	24	63
InterW	Populus fremontii	POFR	dbh	age	years	1/dbh^2	quad	0.93066	0.3461	0.00238			2	80	0.0202	69	0.896	2	102	66
InterW	Populus fremontii	POFR	cdia	dbh	meters	1	loglogw1	0.8055	3.33754	0.07014			1.46	123.09	0.26485	67	0.875	4.6	135.1	65
InterW	Populus fremontii	POFR	dbh	crown dia	meters	1/dbh	quad	1.39601	0.28244	-0.00113			1.81	19.01	0.07746	67	0.913	2.6	23.3	64
InterW	Populus fremontii	POFR	dbh	crown ht	meters	1/dbh	cub	0.31687	0.41511	-0.00476	2e-05		0.91	12.68	0.0927	68	0.825	2	18	64
InterW	Populus fremontii	POFR	age	dbh	centimeters	1/sqrt(age)	cub	-6.42582	4.08619	-0.07247	0.00052		1.46	120.92	19.5642	69	0.913	4.6	135.1	65
InterW	Populus fremontii	POFR	dbh	leaf area	sq. meters	1/dbh	loglogw3	-4.47835	7.10063	0.01306			0.84	1728.07	0.1143	61	0.932	0.6	1766.7	59
InterW	Populus fremontii	POFR	dbh	tree ht	meters	1	loglogw1	0.13464	1.834	0.03048			0.97	20.46	0.17459	68	0.843	3	23	66
InterW	Prunus cerasifera	PRCE	dbh	age	years	1/dbh	cub	-1.09287	0.5252	0.05147	-0.00102		0	50	1.10229	30	0.877	1	40	26
InterW	Prunus cerasifera	PRCE	cdia	dbh	meters	1	loglogw1	1.9686	1.90867	0.04084			3.4	46.3	0.2021	30	0.901	2.5	44.2	28
InterW	Prunus cerasifera	PRCE	dbh	crown dia	meters	1/dbh^2	cub	0.45889	0.12106	0.00926	-0.00018		0.97	8.38	0.00124	30	0.947	0.8	10.4	26
InterW	Prunus cerasifera	PRCE	dbh	crown ht	meters	1	expow1	0.60264	0.02551	0.0608			2.05	6.14	0.24658	30	0.582	1.4	7	28
InterW	Prunus cerasifera	PRCE	age	dbh	centimeters	1/age	lin	3.40112	0.85789				3.4	46.3	1.31856	30	0.867	2.5	44.2	28
InterW	Prunus cerasifera	PRCE	dbh	leaf area	sq. meters	1/sqrt(dbh)	loglogw2	-7.26357	8.04969	0.05963			0.16	44.89	0.24418	27	0.895	0.2	96	25
InterW	Prunus cerasifera	PRCE	dbh	tree ht	meters	1/dbh	lin	2.18343	0.1238				2.6	7.91	0.03499	30	0.762	2.4	8.5	28
InterW	Pyrus calleryana	PYCA	dbh	age	years	1	loglogw1	-3.0019	5.09947	0.14419			1	38	0.37972	30	0.865	0	34	28
InterW	Pyrus calleryana	PYCA	cdia	dbh	meters	1/cdia	cub	6.84516	-1.99931	1.33803	-0.08431		6.45	41.93	0.72225	30	0.96	3.8	38.1	26
InterW	Pyrus calleryana	PYCA	dbh	crown dia	meters	1/sqrt(dbh)	lin	0.40811	0.23051				1.67	10.07	0.06	30	0.949	1	9.9	28
InterW	Pyrus calleryana	PYCA	dbh	crown ht	meters	1	loglogw1	-0.55338	1.87943	0.04212			1.9	7	0.20524	30	0.748	1	8	28
InterW	Pyrus calleryana	PYCA	age	dbh	centimeters	1/age^2	lin	5.48639	0.95917				5.49	41.93	0.06642	30	0.894	3.8	38.1	28
InterW	Pyrus calleryana	PYCA	dbh	leaf area	sq. meters	1	loglogw1	-8.13616	9.4747	0.30088			0.23	94.98	0.54853	30	0.914	0.1	79.9	28
InterW	Pyrus calleryana	PYCA	dbh	tree ht	meters	1	loglogw1	0.08443	1.60079	0.02884			3	9.12	0.16981	30	0.759	2	10	28
InterW	Ulmus pumila	ULPU	dbh	age	years	1/dbh^2	cub	-2.57187	1.16373	-0.01281	9e-05		1	105	0.03678	70	0.921	1	105	66
InterW	Ulmus pumila	ULPU	cdia	dbh	meters	1/cdia	quad	-9.11011	6.17216	-0.05539			2.6	105.74	7.15822	70	0.935	2.5	120.8	67
InterW	Ulmus pumila	ULPU	dbh	crown dia	meters	1/dbh	lin	1.62714	0.19071				1.78	21.79	0.06051	70	0.951	1.9	24.8	68
InterW	Ulmus pumila	ULPU	dbh	crown ht	meters	1/sqrt(dbh)	quad	2.54786	0.1748	-0.00048			2.69	15.68	0.94277	70	0.745	2	21	67
InterW	Ulmus pumila	ULPU	age	dbh	centimeters	1/sqrt(age)	quad	0.79765	1.81294	-0.00775			0.8	105.74	23.8968	70	0.895	2.5	120.8	67
InterW	Ulmus pumila	ULPU	dbh	leaf area	sq. meters	1	loglogw1	-5.3985	7.98602	0.84479			0.32	2000.96	0.91913	69	0.838	0.1	3695.2	67
InterW	Ulmus pumila	ULPU	dbh	tree ht	meters	1/dbh	quad	2.40778	0.28742	-0.00094			2.64	22.28	0.13862	70	0.906	3	27	67
InterW	Washingtonia robusta	WARO	dbh	crown dia	meters	1/sqrt(ht)	cub	0.00862	0.257	0.02221	-0.00157		0.22	3.59				0.2	3.5
InterW	Washingtonia robusta	WARO	dbh	crown ht	meters	1/ht^2	cub	0.00556	0.445	-0.0205	0.00031		0.43	3.19				0	3.6
InterW	Washingtonia robusta	WARO	dbh	leaf area	sq. meters	1/sqrt(ht)	cub	-0.0267	-0.146	0.537	-0.0239		0.16	37.82				0.2	37.9
InterW	Washingtonia robusta	WARO	dbh	tree ht	meters	1/age	quad	0	0.766	-0.00524			0.76	27.97				0	27.4
LoMidW	Acer platanoides	ACPL	dbh	age	years	1/dbh^2	loglogw4	0.90737	2.04434	4e-05			1	85	0.00654	13	0.987	4	102	11
LoMidW	Acer platanoides	ACPL	cdia	dbh	meters	1	loglogw1	1.12433	3.00884	0.0604			1.27	103.07	0.24577	34	0.872	4.8	98.6	32
LoMidW	Acer platanoides	ACPL	dbh	crown dia	meters	1/dbh	loglogw3	-0.65567	2.2607	0.00062			0.22	17.26	0.02488	34	0.964	1.8	19.9	32
LoMidW	Acer platanoides	ACPL	dbh	crown ht	meters	1/dbh^2	quad	0.99499	0.25671	-0.00088			1.25	18.15	0.00209	33	0.909	2	21.5	30
LoMidW	Acer platanoides	ACPL	age	dbh	centimeters	1/age	cub	0.98208	0.25006	0.03658	-0.0003		0.98	103.07	0.48365	13	0.979	4.8	98.6	9
LoMidW	Acer platanoides	ACPL	dbh	leaf area	sq. meters	1	loglogw1	-2.02348	5.95869	0.21884			0.08	1391.58	0.4678	32	0.877	3.2	1049.5	30
LoMidW	Acer platanoides	ACPL	dbh	tree ht	meters	1/dbh^2	quad	2.2278	0.28294	-0.00108			2.5	19.92	0.00245	34	0.907	3.5	23.5	31
LoMidW	Acer rubrum	ACRU	dbh	age	years	1/dbh	quad	2.67773	0.47477	0.00714			1	110	1.04113	24	0.954	4	90	21
LoMidW	Acer rubrum	ACRU	cdia	dbh	meters	1/cdia^2	cub	5.77068	-1.4072	0.65289	-0.01702		1.18	81.35	0.66245	35	0.935	5.1	100.1	31
LoMidW	Acer rubrum	ACRU	dbh	crown dia	meters	1	loglogw1	-0.58934	2.25241	0.0172			0.32	15.77	0.13113	35	0.95	1.8	20.5	33
LoMidW	Acer rubrum	ACRU	dbh	crown ht	meters	1/dbh	quad	1.10084	0.31008	-0.00099			1.46	19.79	0.10063	35	0.924	2.5	29	32
LoMidW	Acer rubrum	ACRU	age	dbh	centimeters	1	quad	-0.2702	1.45336	-0.00647			1.18	81.35	28.1498	24	0.954	5.1	100.1	21
LoMidW	Acer rubrum	ACRU	dbh	leaf area	sq. meters	1/sqrt(dbh)	loglogw2	-1.66428	5.73259	0.01692			0.8	1012.02	0.13006	33	0.971	5.8	1868.7	31
LoMidW	Acer rubrum	ACRU	dbh	tree ht	meters	1/dbh	quad	2.51834	0.34622	-0.00127			2.92	22.31	0.10123	35	0.931	4	31	32
LoMidW	Acer saccharinum	ACSA1	dbh	age	years	1/dbh	quad	1.26026	1.08125	-0.00274			4	120	1.41464	27	0.947	4	97	24
LoMidW	Acer saccharinum	ACSA1	cdia	dbh	meters	1	loglogw1	1.37645	2.9203	0.08532			2.34	120.93	0.2921	54	0.862	2.5	128.8	52
LoMidW	Acer saccharinum	ACSA1	dbh	crown dia	meters	1/dbh	quad	0.77345	0.2696	-0.00119			1.15	16.01	0.08362	54	0.913	1.5	19.3	51
LoMidW	Acer saccharinum	ACSA1	dbh	crown ht	meters	1/sqrt(dbh)	quad	2.40169	0.27414	-0.00108			2.79	19.78	1.51426	54	0.741	2	25.5	51
LoMidW	Acer saccharinum	ACSA1	age	dbh	centimeters	1	loglogw1	-0.89552	3.61294	0.05324			1.42	120.14	0.23074	27	0.94	2.5	128.8	25
LoMidW	Acer saccharinum	ACSA1	dbh	leaf area	sq. meters	1/dbh^2	lin	-29.2496	10.5288				8.05	1235.63	15.7962	50	0.845	1.1	1683	48
LoMidW	Acer saccharinum	ACSA1	dbh	tree ht	meters	1	loglogw1	0.40754	1.71829	0.04609			1.27	22.42	0.21469	54	0.804	2.5	28	52
LoMidW	Acer saccharum	ACSA2	dbh	age	years	1/dbh^2	lin	0.46611	1.07285				2	120	0.16834	14	0.799	4	105	12
LoMidW	Acer saccharum	ACSA2	cdia	dbh	meters	1/sqrt(cdia)	loglogw2	1.03786	3.12362	0.02029			1.58	82.51	0.14245	37	0.945	2.5	118.1	35
LoMidW	Acer saccharum	ACSA2	dbh	crown dia	meters	1	loglogw1	-0.30613	2.01868	0.02727			0.74	14.78	0.16513	37	0.921	1.5	22.4	35
LoMidW	Acer saccharum	ACSA2	dbh	crown ht	meters	1/dbh	quad	0.76026	0.34195	-0.00149			1.33	18.69	0.14024	37	0.906	2	25	34
LoMidW	Acer saccharum	ACSA2	age	dbh	centimeters	1	loglogw1	0.16044	2.68385	0.08969			1.68	80.88	0.29948	14	0.908	2.5	118.1	12
LoMidW	Acer saccharum	ACSA2	dbh	leaf area	sq. meters	1	loglogw1	-0.91222	5.24025	0.185			0.6	1060.97	0.43012	37	0.92	1.3	2236.4	35
LoMidW	Acer saccharum	ACSA2	dbh	tree ht	meters	1/dbh	quad	2.31585	0.36743	-0.00157			2.93	21.79	0.16538	37	0.905	3.5	28	34
LoMidW	Catalpa speciosa	CASP	dbh	age	years	1/dbh^2	cub	0.98321	0.31085	0.01805	-0.00013		2	115	0.02242	59	0.957	2	94	55
LoMidW	Catalpa speciosa	CASP	cdia	dbh	meters	1	loglogw1	0.95774	3.64644	0.06038			2.72	105.73	0.24572	49	0.902	3.7	127.3	47
LoMidW	Catalpa speciosa	CASP	dbh	crown dia	meters	1/dbh	cub	1.16675	0.24286	-0.00211	1e-05		1.39	12.96	0.03051	49	0.928	1.9	16.3	45
LoMidW	Catalpa speciosa	CASP	dbh	crown ht	meters	1	loglogw1	0.07263	1.77743	0.07716			0.57	16.79	0.27777	49	0.694	2	24.5	47
LoMidW	Catalpa speciosa	CASP	age	dbh	centimeters	1	loglogw1	0.73449	2.4836	0.06565			0.94	104.07	0.25622	59	0.891	3.7	127.3	57
LoMidW	Catalpa speciosa	CASP	dbh	leaf area	sq. meters	1	loglogw1	-0.38359	4.46988	0.15712			0.18	710.02	0.39639	44	0.882	3.6	982.7	42
LoMidW	Catalpa speciosa	CASP	dbh	tree ht	meters	1	loglogw1	0.48473	1.59595	0.06665			0.91	19.11	0.25816	49	0.679	3	26.5	47
LoMidW	Cercis canadensis	CECA	dbh	age	years	1/dbh^2	expow4	1.2445	0.0652	3e-05			4	70	0.00557	16	0.987	4	55	14
LoMidW	Cercis canadensis	CECA	cdia	dbh	meters	1	loglogw1	1.04119	3.2403	0.1176			2.6	75	0.34293	33	0.795	2.8	75.4	31
LoMidW	Cercis canadensis	CECA	dbh	crown dia	meters	1/dbh	cub	0.39722	0.42905	-0.0074	4e-05		1.46	9.52	0.03019	33	0.92	1.6	12.6	29
LoMidW	Cercis canadensis	CECA	dbh	crown ht	meters	1/dbh	loglogw3	0.05906	1.26725	0.0021			1.46	7.35	0.04583	33	0.863	1.5	10.5	31
LoMidW	Cercis canadensis	CECA	age	dbh	centimeters	1/age^2	cub	-8.59751	3.09997	-0.07802	0.00073		2.6	75	0.00397	16	0.992	2.8	75.4	12
LoMidW	Cercis canadensis	CECA	dbh	leaf area	sq. meters	1	loglogw1	-1.02131	4.61102	0.41795			2.26	385.49	0.64649	31	0.768	0.7	343.7	29
LoMidW	Cercis canadensis	CECA	dbh	tree ht	meters	1/sqrt(dbh)	loglogw2	0.49306	1.15202	0.00872			2.19	9.2	0.09336	33	0.779	2.5	13	31
LoMidW	Celtis occidentalis	CEOC	dbh	age	years	1/dbh	cub	0.55158	0.53303	0.01189	-9e-05		0	100	1.49287	67	0.935	0	92	63
LoMidW	Celtis occidentalis	CEOC	cdia	dbh	meters	1/cdia^2	cub	5.12976	-0.8643	0.55702	-0.01461		2.84	116.09	0.45119	66	0.958	2.9	115	62
LoMidW	Celtis occidentalis	CEOC	dbh	crown dia	meters	1/dbh	cub	0.21272	0.3833	-0.00301	1e-05		1.28	17.34	0.04766	66	0.957	1.1	22.6	62
LoMidW	Celtis occidentalis	CEOC	dbh	crown ht	meters	1/sqrt(dbh)	quad	1.65026	0.33343	-0.00153			2.58	18.69	0.57839	66	0.91	2.5	23.5	63
LoMidW	Celtis occidentalis	CEOC	age	dbh	centimeters	1/age^2	lin	2.83867	1.1325				2.84	82.11	0.09167	67	0.931	2.9	115	65
LoMidW	Celtis occidentalis	CEOC	dbh	leaf area	sq. meters	1	loglogw1	-1.81944	6.06763	0.14157			1.34	1472.3	0.37626	63	0.946	1.9	2445.6	61
LoMidW	Celtis occidentalis	CEOC	dbh	tree ht	meters	1/sqrt(dbh)	cub	1.8919	0.51947	-0.00504	2e-05		3.33	21.58	0.44638	66	0.942	4	28.5	62
LoMidW	Fraxinus americana	FRAM	dbh	age	years	1/dbh^2	cub	5.50035	-0.64346	0.05181	-0.00036		3	90	0.07259	23	0.874	4	102	19
LoMidW	Fraxinus americana	FRAM	cdia	dbh	meters	1/cdia^2	cub	4.82661	-0.6275	0.65065	-0.01879		2.34	86.36	1.79716	55	0.851	5.1	118.1	51
LoMidW	Fraxinus americana	FRAM	dbh	crown dia	meters	1	loglogw1	-0.59263	2.2256	0.04246			0.87	15.65	0.20607	55	0.875	1.6	21.1	53
LoMidW	Fraxinus americana	FRAM	dbh	crown ht	meters	1/dbh	quad	0.38279	0.42627	-0.00246			1.37	18.82	0.18694	55	0.843	1	25	52
LoMidW	Fraxinus americana	FRAM	age	dbh	centimeters	1/age^2	quad	-3.53416	1.9916	-0.01103			2.34	86.36	0.06919	23	0.922	5.1	118.1	20
LoMidW	Fraxinus americana	FRAM	dbh	leaf area	sq. meters	1	loglogw1	-0.55046	4.84703	0.36009			2.81	991.19	0.60008	52	0.802	1.5	1795.2	50
LoMidW	Fraxinus americana	FRAM	dbh	tree ht	meters	1	loglogw1	0.15275	1.96967	0.04217			1.74	22.45	0.20534	55	0.847	3	29	53
LoMidW	Fraxinus pennsylvanica	FRPE	dbh	age	years	1/sqrt(dbh)	loglogw2	-0.63599	3.1476	0.01658			3	120	0.12878	29	0.938	4	88	27
LoMidW	Fraxinus pennsylvanica	FRPE	cdia	dbh	meters	1	loglogw1	1.0079	3.10966	0.09092			3.56	104.79	0.30152	49	0.851	6.1	116.3	47
LoMidW	Fraxinus pennsylvanica	FRPE	dbh	crown dia	meters	1/dbh	cub	-1.31091	0.54464	-0.00658	3e-05		0.55	19.22	0.07031	49	0.911	2.1	21.2	45
LoMidW	Fraxinus pennsylvanica	FRPE	dbh	crown ht	meters	1	loglogw1	-0.41849	2.13256	0.07955			0.81	18.44	0.28205	49	0.736	2.5	25	47
LoMidW	Fraxinus pennsylvanica	FRPE	age	dbh	centimeters	1/age	loglogw3	0.37847	2.72552	0.0012			1.89	112.57	0.03469	29	0.979	6.1	116.3	27
LoMidW	Fraxinus pennsylvanica	FRPE	dbh	leaf area	sq. meters	1	loglogw1	-1.6597	5.59277	0.35255			0.63	1366.8	0.59376	45	0.82	3.6	1262.3	43
LoMidW	Fraxinus pennsylvanica	FRPE	dbh	tree ht	meters	1/sqrt(dbh)	loglogw2	0.12517	1.8688	0.00978			1.27	21.8	0.09888	49	0.786	4.5	27.5	47
LoMidW	Gleditsia triacanthos	GLTR	dbh	age	years	1/dbh^2	quad	3.10377	0.27378	0.00942			2	100	0.02816	19	0.852	5	56	16
LoMidW	Gleditsia triacanthos	GLTR	cdia	dbh	meters	1/sqrt(cdia)	loglogw2	0.64501	3.19319	0.01171			1.6	115.3	0.10821	35	0.95	4.1	113	33
LoMidW	Gleditsia triacanthos	GLTR	dbh	crown dia	meters	1/dbh^2	quad	0.70515	0.41163	-0.00239			1.46	18.45	0.00083	35	0.981	2.3	19.3	32
LoMidW	Gleditsia triacanthos	GLTR	dbh	crown ht	meters	1	loglogw1	-0.68869	2.36889	0.05236			0.6	20.46	0.22881	35	0.855	2	20.5	33
LoMidW	Gleditsia triacanthos	GLTR	age	dbh	centimeters	1/age	lin	1.85536	1.13446				1.86	115.3	0.87827	19	0.927	4.1	113	17
LoMidW	Gleditsia triacanthos	GLTR	dbh	leaf area	sq. meters	1	loglogw1	-1.62517	5.75729	0.19643			0.43	1755.8	0.44321	31	0.906	2.7	1364.7	29
LoMidW	Gleditsia triacanthos	GLTR	dbh	tree ht	meters	1	loglogw1	0.09613	1.95276	0.02334			1.24	23.25	0.15279	35	0.9	3	22.5	33
LoMidW	Juglans nigra	JUNI	dbh	age	years	1/dbh^2	lin	-1.16343	0.93575				2	115	0.03585	57	0.931	3	105	55
LoMidW	Juglans nigra	JUNI	cdia	dbh	meters	1	loglogw1	0.97851	3.10081	0.06627			1.6	100.48	0.06627	34	0.939	1	96.8	32
LoMidW	Juglans nigra	JUNI	dbh	crown dia	meters	1/dbh	quad	0.80775	0.30997	-0.00145			1.32	17.26	0.08245	34	0.949	1	21.3	31
LoMidW	Juglans nigra	JUNI	dbh	crown ht	meters	1	loglogw1	0.30599	1.67545	0.08803			1.41	17.71	0.29669	34	0.848	0.5	26	32
LoMidW	Juglans nigra	JUNI	age	dbh	centimeters	1	loglogw1	0.18691	2.80787	0.04201			1.66	97.17	0.20496	57	0.934	1	96.8	55
LoMidW	Juglans nigra	JUNI	dbh	leaf area	sq. meters	1	loglogw1	0.54511	4.11293	0.28178			2.72	1026.82	0.53083	34	0.913	0.4	1837.3	32
LoMidW	Juglans nigra	JUNI	dbh	tree ht	meters	1	loglogw1	0.75543	1.48185	0.07415			2.17	20.58	0.27231	34	0.838	1	28	32
LoMidW	Malus spp.	MA2	dbh	age	years	1/dbh	lin	-0.65605	0.82497				0	50	1.5142	31	0.841	0	62	29
LoMidW	Malus spp.	MA2	cdia	dbh	meters	1/cdia^2	quad	-0.49269	2.64501	0.08539			2.49	60.28	0.20306	30	0.962	2.5	64.5	27
LoMidW	Malus spp.	MA2	dbh	crown dia	meters	1	loglogw1	-0.61927	2.27576	0.01644			0.91	13.53	0.12822	30	0.956	1.1	14.7	28
LoMidW	Malus spp.	MA2	dbh	crown ht	meters	1/dbh	lin	1.24241	0.1605				1.64	10.92	0.05103	30	0.844	1.5	11	28
LoMidW	Malus spp.	MA2	age	dbh	centimeters	1/age^2	lin	2.48841	1.15593				2.49	60.28	0.1813	31	0.873	4.1	53.8	29
LoMidW	Malus spp.	MA2	dbh	leaf area	sq. meters	1/sqrt(dbh)	loglogw2	-1.30697	5.09803	0.05018			0.88	446.02	0.224	29	0.928	0.9	742.8	27
LoMidW	Malus spp.	MA2	dbh	tree ht	meters	1/dbh	lin	2.23942	0.177				2.68	12.91	0.04558	30	0.88	2.5	13	28
LoMidW	Morus spp.	MO	dbh	age	years	1/dbh^2	lin	1.30985	0.85002				3	120	0.05606	15	0.874	4	70	13
LoMidW	Morus spp.	MO	cdia	dbh	meters	1	loglogw1	0.79245	3.41084	0.15549			2.55	97.62	0.39432	48	0.81	4.6	152.1	46
LoMidW	Morus spp.	MO	dbh	crown dia	meters	1/dbh	quad	1.24261	0.31533	-0.00166			1.68	16.19	0.08489	48	0.904	1.7	20.4	45
LoMidW	Morus spp.	MO	dbh	crown ht	meters	1	loglogw1	-0.32734	1.95142	0.08205			0.6	14.26	0.28644	48	0.772	1.5	19.5	46
LoMidW	Morus spp.	MO	age	dbh	centimeters	1	loglogw1	-0.06388	2.93553	0.08557			1.38	96	0.29252	15	0.935	4.6	152.1	13
LoMidW	Morus spp.	MO	dbh	leaf area	sq. meters	1/dbh^2	quad	0.59746	4.16372	0.10012			6.55	1323.02	0.31642	45	0.784	2.2	1819	42
LoMidW	Morus spp.	MO	dbh	tree ht	meters	1	loglogw1	0.16248	1.71491	0.06258			0.98	16.15	0.25016	48	0.774	2	21	46
LoMidW	Picea pungens	PIPU	dbh	age	years	1/dbh	lin	1.33277	0.81042				0	87	3.61581	34	0.793	0	102	32
LoMidW	Picea pungens	PIPU	cdia	dbh	meters	1	loglogw1	1.73481	2.78158	0.04863			2.12	53.25	0.22051	35	0.914	2.5	53.3	33
LoMidW	Picea pungens	PIPU	dbh	crown dia	meters	1/dbh^2	cub	0.16491	0.36656	-0.01183	0.00016		0.89	9.89	0.00071	35	0.944	1	8.9	31
LoMidW	Picea pungens	PIPU	dbh	crown ht	meters	1/dbh^2	lin	0.77002	0.25487				1.31	14.34	0.00406	35	0.895	1.5	14	33
LoMidW	Picea pungens	PIPU	age	dbh	centimeters	1/sqrt(age)	quad	2.12167	1.60521	-0.00924			2.12	53.25	21.1287	34	0.894	2.5	53.3	31
LoMidW	Picea pungens	PIPU	dbh	leaf area	sq. meters	1	loglogw1	-0.69166	4.42282	0.23327			1.37	259.79	0.48298	35	0.858	1.3	321.1	33
LoMidW	Picea pungens	PIPU	dbh	tree ht	meters	1/dbh^2	lin	1.17767	0.27639				1.76	15.9	0.0047	35	0.897	2	15	33
LoMidW	Pinus strobus	PIST	dbh	age	years	1/sqrt(dbh)	quad	0.51428	0.55776	0.0201			1	105	0.04859	43	0.978	2	82	40
LoMidW	Pinus strobus	PIST	cdia	dbh	meters	1/cdia	cub	8.00415	-2.9794	1.15073	-0.04729		2.98	67.36	3.72137	39	0.92	3.6	66	35
LoMidW	Pinus strobus	PIST	dbh	crown dia	meters	1/sqrt(dbh)	cub	-0.18953	0.47775	-0.01044	0.0001		0.67	15.8	0.17919	39	0.924	1.6	15.1	35
LoMidW	Pinus strobus	PIST	dbh	crown ht	meters	1/dbh	cub	-0.97897	0.82558	-0.02027	0.0002		0.5	24.41	0.23106	39	0.808	2	24.5	35
LoMidW	Pinus strobus	PIST	age	dbh	centimeters	1	cub	1.87523	1.11975	-0.01146	6e-05		1.88	67.36	5.62031	43	0.972	3.6	66	39
LoMidW	Pinus strobus	PIST	dbh	leaf area	sq. meters	1	loglogw1	-0.24617	4.55342	0.48483			2.57	712.78	0.6963	36	0.754	4.4	748.8	34
LoMidW	Pinus strobus	PIST	dbh	tree ht	meters	1	loglogw1	-0.12577	2.19595	0.04364			1.04	21.11	0.2089	39	0.885	2.5	26	37
LoMidW	Populus deltoides	PODE	dbh	age	years	1/dbh^2	loglogw4	0.20063	2.38362	4e-05			5	90	0.00668	16	0.948	5	68	14
LoMidW	Populus deltoides	PODE	cdia	dbh	meters	1/cdia	lin	-1.94318	5.37387				3.71	153.12	14.8729	59	0.893	4.6	145.8	57
LoMidW	Populus deltoides	PODE	dbh	crown dia	meters	1/dbh	quad	0.62884	0.21447	-0.00037			1.42	24.87	0.07029	59	0.922	2	26.7	56
LoMidW	Populus deltoides	PODE	dbh	crown ht	meters	1/sqrt(dbh)	cub	2.02912	0.5574	-0.00553	2e-05		4.02	29.89	1.78792	59	0.728	4	31	55
LoMidW	Populus deltoides	PODE	age	dbh	centimeters	1	cub	-23.6314	6.13541	-0.13834	0.00102		3.71	153.12	51.3683	16	0.911	4.6	145.8	12
LoMidW	Populus deltoides	PODE	dbh	leaf area	sq. meters	1	loglogw1	-1.7295	5.78645	0.37377			4.34	2534.44	0.61137	52	0.801	6.4	2316.8	50
LoMidW	Populus deltoides	PODE	dbh	tree ht	meters	1/sqrt(dbh)	cub	3.05424	0.60607	-0.00518	2e-05		5.24	32.73	2.17298	59	0.771	5.5	36	55
LoMidW	Pyrus calleryana 'Bradford'	PYCA_B	dbh	age	years	1	lin	-1.06138	0.61303				1	50	3.08666	15	0.898	1	18	13
LoMidW	Pyrus calleryana 'Bradford'	PYCA_B	cdia	dbh	meters	1/sqrt(cdia)	lin	-0.3826	3.36484				5.4	67.63	3.31629	33	0.959	2.5	62	31
LoMidW	Pyrus calleryana 'Bradford'	PYCA_B	dbh	crown dia	meters	1/sqrt(dbh)	lin	0.41182	0.28531				1.59	16.08	0.15067	33	0.96	0.8	16.7	31
LoMidW	Pyrus calleryana 'Bradford'	PYCA_B	dbh	crown ht	meters	1	loglogw1	-0.51013	2.04284	0.05353			1.7	10.46	0.23137	32	0.826	1.5	12	30
LoMidW	Pyrus calleryana 'Bradford'	PYCA_B	age	dbh	centimeters	1/age^2	lin	4.13514	1.2698				4.14	54.93	0.14818	15	0.838	2.5	62	13
LoMidW	Pyrus calleryana 'Bradford'	PYCA_B	dbh	leaf area	sq. meters	1	loglogw1	-1.86944	5.60849	0.20744			3.44	437.87	0.45545	27	0.904	0.2	1176.1	25
LoMidW	Pyrus calleryana 'Bradford'	PYCA_B	dbh	tree ht	meters	1	loglogw1	0.39228	1.55901	0.02317			3.22	13.03	0.15221	33	0.865	2.5	14.5	31
LoMidW	Quercus rubra	QURU	dbh	age	years	1/dbh^2	cub	4.17159	-0.11028	0.02927	-0.00022		2	85	0.01831	22	0.879	4	84	18
LoMidW	Quercus rubra	QURU	cdia	dbh	meters	1	loglogw1	0.44649	3.68716	0.03473			3.04	130.87	0.18637	60	0.955	3.6	129	58
LoMidW	Quercus rubra	QURU	dbh	crown dia	meters	1/dbh	cub	1.43282	0.30304	-0.00198	1e-05		1.88	24.77	0.05362	60	0.95	2.6	30.5	56
LoMidW	Quercus rubra	QURU	dbh	crown ht	meters	1/dbh	lin	3.57192	0.17689				3.84	26.72	0.13506	60	0.88	3	30	58
LoMidW	Quercus rubra	QURU	age	dbh	centimeters	1/age^2	lin	-0.0381	1.54005				1.5	130.87	0.16959	22	0.804	3.6	129	20
LoMidW	Quercus rubra	QURU	dbh	leaf area	sq. meters	1	loglogw1	-1.12985	5.39091	0.25298			0.41	1911.05	0.50298	58	0.886	5.1	2877.7	56
LoMidW	Quercus rubra	QURU	dbh	tree ht	meters	1/dbh	quad	4.17915	0.25511	-0.00052			4.56	28.6	0.14019	60	0.9	4.5	34	57
LoMidW	Tilia cordata	TICO	dbh	age	years	1/dbh^2	quad	2.79757	0.34027	0.00877			3	110	0.02688	16	0.918	4	80	13
LoMidW	Tilia cordata	TICO	cdia	dbh	meters	1/cdia^2	quad	0.78944	2.49103	0.21338			3.11	98.18	1.18296	36	0.912	4.8	98.3	33
LoMidW	Tilia cordata	TICO	dbh	crown dia	meters	1/sqrt(dbh)	cub	-1.25633	0.5519	-0.00935	6e-05		0.42	17.86	0.18437	36	0.938	1.6	18.2	32
LoMidW	Tilia cordata	TICO	dbh	crown ht	meters	1/dbh^2	lin	0.92428	0.21053				1.28	21.36	0.00393	36	0.864	1.5	23.5	34
LoMidW	Tilia cordata	TICO	age	dbh	centimeters	1	loglogw1	0.18526	2.82231	0.05631			1.69	97.08	0.23729	16	0.935	4.8	98.3	14
LoMidW	Tilia cordata	TICO	dbh	leaf area	sq. meters	1	loglogw1	-2.32368	5.79031	0.27918			0.2	787.06	0.52837	32	0.877	2.1	916.1	30
LoMidW	Tilia cordata	TICO	dbh	tree ht	meters	1/dbh^2	lin	2.14029	0.23393				2.53	24.85	0.00354	36	0.897	3	25.5	34
LoMidW	Ulmus pumila	ULPU	dbh	age	years	1/dbh	quad	-0.89475	0.86998	-0.00228			0	120	2.12217	62	0.859	0	92	59
LoMidW	Ulmus pumila	ULPU	cdia	dbh	meters	1	loglogw1	0.97128	3.20981	0.07439			3.77	122.68	0.27275	54	0.897	2	122.2	52
LoMidW	Ulmus pumila	ULPU	dbh	crown dia	meters	1/dbh	quad	1.31096	0.25183	-0.00074			2.25	21.13	0.10076	54	0.917	1.5	27.3	51
LoMidW	Ulmus pumila	ULPU	dbh	crown ht	meters	1/sqrt(dbh)	quad	2.26756	0.30318	-0.00143			3.39	18.32	1.18828	54	0.79	2	24.5	51
LoMidW	Ulmus pumila	ULPU	age	dbh	centimeters	1/age	quad	3.76769	1.89111	-0.0075			3.77	122.68	8.47575	62	0.92	2	122.2	59
LoMidW	Ulmus pumila	ULPU	dbh	leaf area	sq. meters	1	loglogw1	-0.43895	4.84379	0.28085			8.48	1504.35	0.52995	50	0.856	0.5	2627.4	48
LoMidW	Ulmus pumila	ULPU	dbh	tree ht	meters	1	quad	4.42309	0.29027	-0.00125			5.5	21.29	8.66317	54	0.714	2.5	27	51
MidWst	Acer negundo	ACNE	dbh	age	years	1/dbh^2	cub	-2.97492	0.78209	-0.00992	7e-05		1	40	0.00336	42	0.97	0	40	38
MidWst	Acer negundo	ACNE	cdia	dbh	meters	1	loglogw1	0.80635	3.38779	0.05884			4.31	88.65	0.24256	42	0.83	4.3	92.5	40
MidWst	Acer negundo	ACNE	dbh	crown dia	meters	1/dbh	loglogw3	-0.11047	1.80298	0.00065			2.25	13.85	0.02548	42	0.942	2.2	15.9	40
MidWst	Acer negundo	ACNE	dbh	crown ht	meters	1	loglogw1	0.67485	1.27142	0.05504			3.83	13.38	0.23461	41	0.495	3.2	16	39
MidWst	Acer negundo	ACNE	age	dbh	centimeters	1/age	lin	4.2805	2.10929				4.28	88.65	2.61565	42	0.966	4.3	92.5	40
MidWst	Acer negundo	ACNE	dbh	leaf area	sq. meters	1	loglogw1	-2.52725	5.90164	0.58343			4.18	824.64	0.76382	39	0.549	3.1	906.7	37
MidWst	Acer negundo	ACNE	dbh	tree ht	meters	1	cub	1.74178	0.71565	-0.01319	8e-05		4.57	18.74	4.66048	41	0.538	5	19.5	37
MidWst	Acer platanoides	ACPL	dbh	age	years	1/dbh	quad	1.81099	0.32363	0.00337			3	50	0.11763	48	0.967	2	44	45
MidWst	Acer platanoides	ACPL	cdia	dbh	meters	1/cdia^2	quad	-0.11612	2.86894	0.09215			2.66	60	0.53226	46	0.912	4.6	77.5	43
MidWst	Acer platanoides	ACPL	dbh	crown dia	meters	1	loglogw1	-0.87092	2.44034	0.02608			0.81	16.97	0.16151	46	0.929	1.7	14.4	44
MidWst	Acer platanoides	ACPL	dbh	crown ht	meters	1	loglogw1	-0.51719	2.09545	0.03722			1.06	14.36	0.19292	46	0.872	1.3	13.5	44
MidWst	Acer platanoides	ACPL	age	dbh	centimeters	1	cub	-7.94613	3.80588	-0.09314	0.00115		2.66	93.26	8.91825	48	0.973	4.6	77.5	44
MidWst	Acer platanoides	ACPL	dbh	leaf area	sq. meters	1	loglogw1	-5.73301	8.28918	0.32741			1.46	1226.83	0.5722	47	0.923	0.2	444.7	45
MidWst	Acer platanoides	ACPL	dbh	tree ht	meters	1	loglogw1	0.22989	1.78058	0.01837			2.03	18.72	0.13555	47	0.908	3	19	45
MidWst	Acer rubrum	ACRU	dbh	age	years	1	quad	-4.15944	1.18592	-0.01123			1	30	2.14388	46	0.972	0	28	43
MidWst	Acer rubrum	ACRU	cdia	dbh	meters	1/cdia^2	cub	3.03628	0.25987	0.48144	-0.01807		4.12	63.03	0.1721	46	0.963	3.8	54.6	42
MidWst	Acer rubrum	ACRU	dbh	crown dia	meters	1/sqrt(dbh)	cub	-0.3276	0.48909	-0.00869	8e-05		1.55	17.07	0.10777	46	0.961	0.9	14.2	42
MidWst	Acer rubrum	ACRU	dbh	crown ht	meters	1/dbh	quad	0.25274	0.34103	-0.0021			1.62	13.42	0.07929	46	0.878	1	13.5	43
MidWst	Acer rubrum	ACRU	age	dbh	centimeters	1/sqrt(age)	cub	4.12164	1.34432	-0.07276	0.00311		4.12	63.03	1.63944	46	0.981	3.8	54.6	42
MidWst	Acer rubrum	ACRU	dbh	leaf area	sq. meters	1	loglogw1	-6.24096	8.89939	0.11788			0.21	712.74	0.34334	46	0.98	0.1	603.3	44
MidWst	Acer rubrum	ACRU	dbh	tree ht	meters	1	loglogw1	0.13264	1.91472	0.03171			2.98	17.62	0.17807	46	0.893	2.5	18	44
MidWst	Acer saccharinum	ACSA1	dbh	age	years	1	cub	2.26429	0.40698	-0.00273	2e-05		2	40	4.16334	42	0.969	0	44	38
MidWst	Acer saccharinum	ACSA1	cdia	dbh	meters	1	loglogw1	0.86133	3.29774	0.04906			2.24	101.64	0.2215	42	0.959	0.8	111	40
MidWst	Acer saccharinum	ACSA1	dbh	crown dia	meters	1/dbh	cub	0.79381	0.34644	-0.00321	2e-05		1.55	19.42	0.06664	42	0.955	1	26	38
MidWst	Acer saccharinum	ACSA1	dbh	crown ht	meters	1/dbh	quad	1.04591	0.31588	-0.00172			1.75	15.54	0.16624	42	0.881	1	23	39
MidWst	Acer saccharinum	ACSA1	age	dbh	centimeters	1	cub	-1.7914	1.88949	0.06576	-0.00121		2.24	101.64	34.6769	42	0.966	0.8	111	38
MidWst	Acer saccharinum	ACSA1	dbh	leaf area	sq. meters	1	loglogw1	-2.14054	5.72551	0.44629			0.8	997.35	0.66805	41	0.921	0	2294.9	39
MidWst	Acer saccharinum	ACSA1	dbh	tree ht	meters	1/dbh	quad	2.04821	0.41488	-0.00201			2.97	23.41	0.18016	42	0.932	2	31	39
MidWst	Acer saccharum	ACSA2	dbh	age	years	1	cub	-1.47565	0.72355	-0.00405	4e-05		1	60	1.33169	48	0.994	0	52	44
MidWst	Acer saccharum	ACSA2	cdia	dbh	meters	1/cdia	lin	-2.33279	4.49317				3.85	86.15	9.68502	48	0.895	3.3	83.3	46
MidWst	Acer saccharum	ACSA2	dbh	crown dia	meters	1/dbh	quad	0.40106	0.30962	-0.00154			1.17	15.67	0.09396	48	0.909	1.1	16.9	45
MidWst	Acer saccharum	ACSA2	dbh	crown ht	meters	1	loglogw1	-0.29475	2.03741	0.02735			1.22	15.82	0.16538	48	0.937	1.5	18	46
MidWst	Acer saccharum	ACSA2	age	dbh	centimeters	1	cub	2.52368	1.31314	0.01822	-0.00028		2.52	86.15	3.16858	48	0.995	3.3	83.3	44
MidWst	Acer saccharum	ACSA2	dbh	leaf area	sq. meters	1	loglogw1	-5.30849	8.07822	0.32745			0.44	1181.06	0.57223	48	0.951	0	1132.5	46
MidWst	Acer saccharum	ACSA2	dbh	tree ht	meters	1/dbh	cub	1.40329	0.61086	-0.00895	6e-05		2.89	23.46	0.06041	48	0.96	3	23.5	44
MidWst	Celtis occidentalis	CEOC	dbh	age	years	1/dbh	cub	-2.71962	0.90306	-0.01277	0.0001		0	52	0.10249	49	0.987	0	56	45
MidWst	Celtis occidentalis	CEOC	cdia	dbh	meters	1/cdia^2	cub	3.819	-0.37727	0.54082	-0.01523		3.55	92.48	0.53727	49	0.95	3	101.1	45
MidWst	Celtis occidentalis	CEOC	dbh	crown dia	meters	1/dbh	cub	-0.07797	0.4198	-0.00447	2e-05		1.36	18.8	0.04691	49	0.963	1.2	22.1	45
MidWst	Celtis occidentalis	CEOC	dbh	crown ht	meters	1/dbh	cub	0.11329	0.42387	-0.00613	4e-05		1.54	16.09	0.08312	49	0.907	1	20.5	45
MidWst	Celtis occidentalis	CEOC	age	dbh	centimeters	1/sqrt(age)	cub	3.54797	1.18435	0.0522	-0.00081		3.55	92.48	4.1289	49	0.989	3	101.1	45
MidWst	Celtis occidentalis	CEOC	dbh	leaf area	sq. meters	1	loglogw1	-5.43034	8.11336	0.21848			0.22	1134.12	0.46742	49	0.967	0.1	1843.8	47
MidWst	Celtis occidentalis	CEOC	dbh	tree ht	meters	1/dbh	cub	1.27137	0.53445	-0.00705	4e-05		3.08	23.88	0.11077	49	0.936	2.5	29	45
MidWst	Fraxinus americana	FRAM	dbh	age	years	1	cub	-0.97466	0.72273	-0.01606	0.00026		1	24	0.57813	38	0.989	0	24	34
MidWst	Fraxinus americana	FRAM	cdia	dbh	meters	1/cdia^2	cub	5.47308	-2.47601	1.13514	-0.05546		3.74	45.6	0.15337	38	0.968	3.3	46.7	34
MidWst	Fraxinus americana	FRAM	dbh	crown dia	meters	1/dbh	cub	-0.37618	0.6022	-0.01746	0.00023		1.2	12.6	0.02282	38	0.965	1.4	13.5	34
MidWst	Fraxinus americana	FRAM	dbh	crown ht	meters	1	loglogw1	0.1123	1.72944	0.02332			1.9	11.53	0.15269	38	0.921	2	12.5	36
MidWst	Fraxinus americana	FRAM	age	dbh	centimeters	1	cub	2.83778	0.75231	0.15946	-0.00486		2.84	45.6	1.94961	38	0.991	3.3	46.7	34
MidWst	Fraxinus americana	FRAM	dbh	leaf area	sq. meters	1	loglogw1	-4.58675	7.64125	0.14424			0.42	343.72	0.37979	37	0.974	0.2	426.9	35
MidWst	Fraxinus americana	FRAM	dbh	tree ht	meters	1	loglogw1	0.65269	1.57152	0.01067			3.08	15.96	0.10332	38	0.955	3.5	17	36
MidWst	Fraxinus pennsylvanica	FRPE	dbh	age	years	1/dbh^2	cub	0.64219	0.50049	-0.00115	2e-05		2	70	0.00156	46	0.989	3	60	42
MidWst	Fraxinus pennsylvanica	FRPE	cdia	dbh	meters	1/cdia^2	cub	5.37282	-0.59669	0.69285	-0.02238		1.99	88	0.99473	46	0.912	5.8	107.2	42
MidWst	Fraxinus pennsylvanica	FRPE	dbh	crown dia	meters	1	loglogw1	-1.10801	2.59819	0.03031			0.43	18.25	0.17411	46	0.93	1.3	23.7	44
MidWst	Fraxinus pennsylvanica	FRPE	dbh	crown ht	meters	1/dbh	cub	-0.73231	0.67731	-0.01261	8e-05		0.57	23.67	0.11324	46	0.848	2	27	42
MidWst	Fraxinus pennsylvanica	FRPE	age	dbh	centimeters	1/age	quad	-2.71787	2.37818	-0.01186			1.99	105.62	0.30639	42	0.993	5.8	107.2	39
MidWst	Fraxinus pennsylvanica	FRPE	dbh	leaf area	sq. meters	1	loglogw1	-5.96702	8.57193	0.31371			0.45	1854.81	0.5601	46	0.933	0.2	2213.4	44
MidWst	Fraxinus pennsylvanica	FRPE	dbh	tree ht	meters	1	loglogw1	0.38241	1.8267	0.02811			1.77	24.6	0.16767	46	0.875	4	35	44
MidWst	Ginkgo biloba	GIBI	dbh	age	years	1/dbh^2	quad	-3.88622	1.16852	-0.01003			0	40	0.01897	48	0.944	0	27	45
MidWst	Ginkgo biloba	GIBI	cdia	dbh	meters	1/cdia	cub	3.70689	-0.19414	1.29742	-0.10433		3.59	30	3.14824	48	0.898	3	38.6	44
MidWst	Ginkgo biloba	GIBI	dbh	crown dia	meters	1/dbh	lin	0.22006	0.22938				1.04	11.51	0.04913	48	0.891	0.8	9.2	46
MidWst	Ginkgo biloba	GIBI	dbh	crown ht	meters	1/dbh	quad	-0.00138	0.33859	-0.00299			1.17	9.42	0.04858	48	0.898	0.5	10.5	45
MidWst	Ginkgo biloba	GIBI	age	dbh	centimeters	1/sqrt(age)	lin	3.58555	1.14093				3.59	49.22	3.00452	48	0.953	3	38.6	46
MidWst	Ginkgo biloba	GIBI	dbh	leaf area	sq. meters	1	loglogw1	-7.68043	9.20939	0.3855			0.2	167.09	0.62089	48	0.948	0	111.1	46
MidWst	Ginkgo biloba	GIBI	dbh	tree ht	meters	1/dbh^2	quad	1.07265	0.49602	-0.00525			2.78	12.78	0.00387	48	0.927	2.5	14	45
MidWst	Gleditsia triacanthos	GLTR	dbh	age	years	1	cub	0.06413	0.63494	-0.01184	0.00013		1	21	1.63838	48	0.958	0	23	44
MidWst	Gleditsia triacanthos	GLTR	cdia	dbh	meters	1/cdia^2	cub	4.75793	-1.29771	0.68056	-0.02543		3.77	53.79	0.26751	48	0.947	4.1	61.5	44
MidWst	Gleditsia triacanthos	GLTR	dbh	crown dia	meters	1	loglogw1	-0.47127	2.22176	0.02171			1.71	13.69	0.14734	48	0.95	1.6	17.4	46
MidWst	Gleditsia triacanthos	GLTR	dbh	crown ht	meters	1/dbh	lin	0.58489	0.24569				1.51	13.8	0.09563	48	0.895	0.8	19.7	46
MidWst	Gleditsia triacanthos	GLTR	age	dbh	centimeters	1/sqrt(age)	cub	4.22795	-0.82484	0.37243	-0.01051		3.77	53.79	2.5996	48	0.984	4.1	61.5	44
MidWst	Gleditsia triacanthos	GLTR	dbh	leaf area	sq. meters	1	loglogw1	-5.74116	8.48657	0.20082			0.24	513.57	0.44813	48	0.968	0.2	797.6	46
MidWst	Gleditsia triacanthos	GLTR	dbh	tree ht	meters	1/dbh	cub	0.64936	0.69261	-0.0149	0.00015		3.05	18.36	0.07495	48	0.943	2.6	22	44
MidWst	Malus spp.	MA2	dbh	age	years	1/sqrt(dbh)	quad	-3.9163	1.33645	-0.01152			0	40	3.07318	50	0.916	0	36	47
MidWst	Malus spp.	MA2	cdia	dbh	meters	1/cdia	lin	-2.32792	4.50449				3.23	69.76	3.68265	50	0.922	1.3	55.9	48
MidWst	Malus spp.	MA2	dbh	crown dia	meters	1/dbh	quad	0.60932	0.25747	-0.00113			1.43	13.06	0.04176	50	0.929	1	11.8	47
MidWst	Malus spp.	MA2	dbh	crown ht	meters	1/dbh	lin	0.85016	0.12465				1.25	9.55	0.05469	50	0.783	0.5	9	48
MidWst	Malus spp.	MA2	age	dbh	centimeters	1/sqrt(age)	cub	3.23454	1.60114	-0.0723	0.00185		3.23	69.76	6.15799	50	0.944	1.3	55.9	46
MidWst	Malus spp.	MA2	dbh	leaf area	sq. meters	1	loglogw1	-5.05585	6.85963	0.72468			0.37	231.5	0.85128	50	0.869	0	222.6	48
MidWst	Malus spp.	MA2	dbh	tree ht	meters	1/dbh	quad	1.58546	0.22435	-0.00107			2.3	12.03	0.03627	50	0.916	2	12	47
MidWst	Quercus palustris	QUPA	dbh	age	years	1/dbh	cub	-5.27184	1.59264	-0.03729	0.00034		0	38	0.05021	47	0.984	0	35	43
MidWst	Quercus palustris	QUPA	cdia	dbh	meters	1	loglogw1	1.23261	2.74925	0.04982			3.31	67.23	0.2232	47	0.9	3.3	69.1	45
MidWst	Quercus palustris	QUPA	dbh	crown dia	meters	1/dbh	quad	0.47595	0.33404	-0.00198			1.55	14	0.04781	47	0.925	1.8	16.9	44
MidWst	Quercus palustris	QUPA	dbh	crown ht	meters	1/dbh	lin	0.95646	0.26112				1.82	18.51	0.09777	47	0.899	1.5	20	45
MidWst	Quercus palustris	QUPA	age	dbh	centimeters	1/age	cub	3.31385	-0.16442	0.14156	-0.00245		3.29	67.23	0.79453	47	0.983	3.3	69.1	43
MidWst	Quercus palustris	QUPA	dbh	leaf area	sq. meters	1	loglogw1	-6.60592	8.9679	0.26758			0.09	729.28	0.51728	46	0.937	0.1	747.1	44
MidWst	Quercus palustris	QUPA	dbh	tree ht	meters	1/dbh	quad	1.03069	0.51029	-0.00336			2.67	20.14	0.0942	47	0.928	3	23	44
MidWst	Quercus rubra	QURU	dbh	age	years	1/dbh^2	cub	-0.97311	0.73213	-0.00584	0.00011		0	69	0.01926	45	0.939	0	80	41
MidWst	Quercus rubra	QURU	cdia	dbh	meters	1/cdia^2	quad	-0.16138	2.40517	0.16111			1.99	75.63	1.06133	45	0.862	1.3	85.3	42
MidWst	Quercus rubra	QURU	dbh	crown dia	meters	1	quad	1.59756	0.24581	-0.00108			2.08	13.35	2.38074	45	0.826	0.8	16.9	42
MidWst	Quercus rubra	QURU	dbh	crown ht	meters	1	quad	1.17164	0.32514	-0.00243			1.81	12.05	3.02052	45	0.761	1	14	42
MidWst	Quercus rubra	QURU	age	dbh	centimeters	1/sqrt(age)	quad	1.99374	1.63948	-0.00829			1.99	68.49	3.70774	45	0.97	1.3	85.3	42
MidWst	Quercus rubra	QURU	dbh	leaf area	sq. meters	1	loglogw1	-3.84238	6.6074	1.14876			0.64	694.76	1.0718	44	0.811	0	772.1	42
MidWst	Quercus rubra	QURU	dbh	tree ht	meters	1	quad	2.55988	0.42636	-0.00311			3.4	17.16	3.91436	45	0.816	2	20.5	42
MidWst	Tilia americana	TIAM	dbh	age	years	1	quad	-5.11849	1.01435	-0.00341			1	67	6.76341	46	0.985	3	70	43
MidWst	Tilia americana	TIAM	cdia	dbh	meters	1/cdia^2	cub	0.91194	2.31305	0.38623	-0.01244		4.9	105	0.85966	46	0.934	5.3	120	42
MidWst	Tilia americana	TIAM	dbh	crown dia	meters	1/dbh	cub	0.36111	0.29203	-0.00294	2e-05		1.29	26.11	0.05714	46	0.939	1.4	29	42
MidWst	Tilia americana	TIAM	dbh	crown ht	meters	1	loglogw1	-0.73586	2.37058	0.04044			1.21	19.67	0.20109	46	0.918	1.5	23.2	44
MidWst	Tilia americana	TIAM	age	dbh	centimeters	1	cub	3.29265	1.6335	-0.02574	0.0004		3.29	117.21	9.4755	46	0.99	5.3	120	42
MidWst	Tilia americana	TIAM	dbh	leaf area	sq. meters	1	loglogw1	-6.80616	9.05154	0.2421			0.36	1932.96	0.49204	45	0.965	0.2	3306.8	43
MidWst	Tilia americana	TIAM	dbh	tree ht	meters	1/sqrt(dbh)	loglogw2	-0.04097	2.0898	0.00438			2.12	25.76	0.06622	46	0.951	3	30	44
MidWst	Tilia cordata	TICO	dbh	age	years	1	cub	-1.50666	0.68404	-0.01282	0.00015		1	30	0.40165	38	0.992	0	32	34
MidWst	Tilia cordata	TICO	cdia	dbh	meters	1/cdia^2	quad	0.70523	3.20816	0.12761			4.64	66.18	0.57715	38	0.941	3.3	67.1	35
MidWst	Tilia cordata	TICO	dbh	crown dia	meters	1	loglogw1	-1.2244	2.59725	0.02277			0.8	12.36	0.15091	38	0.96	0.9	13.4	36
MidWst	Tilia cordata	TICO	dbh	crown ht	meters	1/dbh^2	cub	-1.06946	0.63398	-0.01155	8e-05		0.91	14.49	0.00359	38	0.928	0.9	16	34
MidWst	Tilia cordata	TICO	age	dbh	centimeters	1/sqrt(age)	cub	3.31492	1.20157	0.13063	-0.00336		3.31	66.18	0.76342	38	0.995	3.3	67.1	34
MidWst	Tilia cordata	TICO	dbh	leaf area	sq. meters	1	loglogw1	-7.34991	9.5324	0.2519			0.23	666.71	0.50189	38	0.967	0	604.7	36
MidWst	Tilia cordata	TICO	dbh	tree ht	meters	1/sqrt(dbh)	loglogw2	0.11385	1.96057	0.004			2.37	19.05	0.06324	38	0.959	2.5	20	36
MidWst	Ulmus americana	ULAM	dbh	age	years	1/dbh^2	lin	-3.1323	0.78517				1	94	0.00705	42	0.984	0	94	40
MidWst	Ulmus americana	ULAM	cdia	dbh	meters	1/cdia^2	lin	-2.02697	4.64337				5.25	114.49	0.52905	42	0.961	3.8	118.6	40
MidWst	Ulmus americana	ULAM	dbh	crown dia	meters	1/dbh^2	quad	0.1877	0.27004	-0.00064			1.2	22.73	0.00098	42	0.971	1.2	26.3	39
MidWst	Ulmus americana	ULAM	dbh	crown ht	meters	1	lin	5.13369	0.11163				5.56	17.91	9.71248	42	0.508	1.8	22.6	40
MidWst	Ulmus americana	ULAM	age	dbh	centimeters	1/age^2	quad	3.79547	1.45324	-0.00293			3.8	114.49	0.02509	42	0.984	3.8	118.6	39
MidWst	Ulmus americana	ULAM	dbh	leaf area	sq. meters	1	loglogw1	-6.7197	9.16983	0.27263			0.6	2505.31	0.52214	38	0.852	13.7	4631.3	36
MidWst	Ulmus americana	ULAM	dbh	tree ht	meters	1	loglogw1	0.30515	1.86748	0.02673			3.19	25.03	0.1635	42	0.835	2.8	29	40
MidWst	Ulmus pumila	ULPU	dbh	age	years	1/dbh^2	quad	0.44305	0.32911	0.00207			2	45	0.01157	37	0.884	1	45	34
MidWst	Ulmus pumila	ULPU	cdia	dbh	meters	1/cdia^2	cub	5.39505	-0.13894	0.56638	-0.01826		1.83	82	0.55777	37	0.926	7	86.9	33
MidWst	Ulmus pumila	ULPU	dbh	crown dia	meters	1/dbh	cub	-0.96451	0.50787	-0.00842	6e-05		2.03	21.87	0.04474	37	0.931	1.6	20.8	33
MidWst	Ulmus pumila	ULPU	dbh	crown ht	meters	1/dbh	quad	0.4878	0.41383	-0.00312			1.24	14.21	0.15683	37	0.777	2.1	20	34
MidWst	Ulmus pumila	ULPU	age	dbh	centimeters	1	cub	-8.78866	5.69632	-0.19865	0.00269		1.83	90.8	69.5905	37	0.853	7	86.9	33
MidWst	Ulmus pumila	ULPU	dbh	leaf area	sq. meters	1	loglogw1	-4.72893	7.54544	0.32716			3.27	942.44	0.57198	33	0.862	0.8	791.9	31
MidWst	Ulmus pumila	ULPU	dbh	tree ht	meters	1	loglogw1	0.23887	1.9076	0.03477			1.41	22.73	0.18647	37	0.81	4	26	35
NMtnPr	Acer platanoides	ACPL	dbh	age	years	1/dbh^2	lin	-2.53308	0.94559				1	120	0.04556	60	0.929	0	88	58
NMtnPr	Acer platanoides	ACPL	cdia	dbh	meters	1/cdia	quad	-0.88817	2.92155	0.10277			4.15	92.73	7.29524	59	0.889	2.9	103.1	56
NMtnPr	Acer platanoides	ACPL	dbh	crown dia	meters	1/dbh	cub	-0.58987	0.53395	-0.00791	5e-05		0.86	18.62	0.04449	59	0.94	1.5	19.9	55
NMtnPr	Acer platanoides	ACPL	dbh	crown ht	meters	1/sqrt(dbh)	quad	2.34685	0.24872	-0.00102			3.04	16.64	0.74096	59	0.683	2.5	19.5	56
NMtnPr	Acer platanoides	ACPL	age	dbh	centimeters	1/age^2	quad	2.83678	1.31988	-0.00476			2.84	92.73	0.07659	60	0.94	2.9	103.1	57
NMtnPr	Acer platanoides	ACPL	dbh	leaf area	sq. meters	1/dbh^2	quad	-24.9183	6.40701	0.08505			3.15	1300.56	10.4284	59	0.88	5.7	1849.9	56
NMtnPr	Acer platanoides	ACPL	dbh	tree ht	meters	1	loglogw1	0.41126	1.6406	0.02514			2.49	18.14	0.15854	59	0.81	4	22	57
NMtnPr	Acer saccharinum	ACSA1	dbh	age	years	1/dbh^2	lin	-1.71343	0.70562				1	120	0.02701	66	0.934	0	87	64
NMtnPr	Acer saccharinum	ACSA1	cdia	dbh	meters	1	loglogw1	0.4126	3.72384	0.05515			4.56	130	0.23485	65	0.837	2.9	144.8	63
NMtnPr	Acer saccharinum	ACSA1	dbh	crown dia	meters	1/dbh^2	loglogw4	-0.73809	2.44287	1e-05			0.98	25.41	0.00256	65	0.925	2.6	25.9	63
NMtnPr	Acer saccharinum	ACSA1	dbh	crown ht	meters	1/sqrt(dbh)	cub	0.34465	0.49071	-0.00456	2e-05		1.7	22.22	0.78705	65	0.769	4.5	25	61
NMtnPr	Acer saccharinum	ACSA1	age	dbh	centimeters	1/age^2	quad	2.8327	1.72872	-0.00484			2.83	140.59	0.13066	66	0.942	2.9	144.8	63
NMtnPr	Acer saccharinum	ACSA1	dbh	leaf area	sq. meters	1	loglogw1	-0.67729	5.20947	0.17475			3.29	2318.93	0.41803	58	0.876	2.9	2834.3	56
NMtnPr	Acer saccharinum	ACSA1	dbh	tree ht	meters	1	loglogw1	0.51893	1.70512	0.01808			2.81	25.8	0.13448	65	0.793	6.5	27.5	63
NMtnPr	Acer saccharum	ACSA2	dbh	age	years	1/sqrt(dbh)	lin	-1.27606	0.92035				1	80	2.6718	22	0.966	0	77	20
NMtnPr	Acer saccharum	ACSA2	cdia	dbh	meters	1/cdia^2	quad	2.87731	0.16644	0.23426			3.34	84.61	0.14503	21	0.963	2.3	84.2	18
NMtnPr	Acer saccharum	ACSA2	dbh	crown dia	meters	1/sqrt(dbh)	cub	-0.58275	0.63195	-0.00979	6e-05		0.82	18.29	0.06878	21	0.987	1.1	18.1	17
NMtnPr	Acer saccharum	ACSA2	dbh	crown ht	meters	1/sqrt(dbh)	quad	1.46638	0.34859	-0.00211			2.26	15.85	0.20349	21	0.95	1.5	17.5	18
NMtnPr	Acer saccharum	ACSA2	age	dbh	centimeters	1/age	lin	2.30714	1.02877				2.31	84.61	1.05459	22	0.943	2.3	84.2	20
NMtnPr	Acer saccharum	ACSA2	dbh	leaf area	sq. meters	1	loglogw1	0.04717	4.6728	0.13717			3.14	1205.28	0.37037	21	0.964	3.3	1492.4	19
NMtnPr	Acer saccharum	ACSA2	dbh	tree ht	meters	1	loglogw1	0.59585	1.53901	0.01712			2.42	18.11	0.13086	21	0.959	2.5	21	19
NMtnPr	Celtis occidentalis	CEOC	dbh	age	years	1/dbh	cub	0.55158	0.53303	0.01189	-9e-05		0	100	1.49287	67	0.935	0	92	63
NMtnPr	Celtis occidentalis	CEOC	cdia	dbh	meters	1/cdia^2	cub	5.12976	-0.8643	0.55702	-0.01461		2.84	100	0.45119	66	0.958	2.9	115	62
NMtnPr	Celtis occidentalis	CEOC	dbh	crown dia	meters	1/dbh	cub	0.21272	0.3833	-0.00301	1e-05		1.28	20.94	0.04766	66	0.957	1.1	22.6	62
NMtnPr	Celtis occidentalis	CEOC	dbh	crown ht	meters	1/sqrt(dbh)	quad	1.65026	0.33343	-0.00153			2.58	19.77	0.57839	66	0.91	2.5	23.5	63
NMtnPr	Celtis occidentalis	CEOC	age	dbh	centimeters	1/age^2	lin	2.83867	1.1325				2.84	116.09	0.09167	67	0.931	2.9	115	65
NMtnPr	Celtis occidentalis	CEOC	dbh	leaf area	sq. meters	1	loglogw1	-1.81944	6.06763	0.14157			1.34	2300.33	0.37626	63	0.946	1.9	2445.6	61
NMtnPr	Celtis occidentalis	CEOC	dbh	tree ht	meters	1/sqrt(dbh)	cub	1.8919	0.51947	-0.00504	2e-05		3.33	25.39	0.44638	66	0.942	4	28.5	62
NMtnPr	Fraxinus americana	FRAM	dbh	age	years	1/dbh^2	cub	-3.11077	1.2205	-0.01731	0.00015		1	64	0.01032	31	0.971	0	76	27
NMtnPr	Fraxinus americana	FRAM	cdia	dbh	meters	1/cdia^2	quad	2.38185	0.93088	0.19535			3.65	80.31	0.36583	30	0.944	2.9	89.2	27
NMtnPr	Fraxinus americana	FRAM	dbh	crown dia	meters	1	loglogw1	-0.50892	2.27196	0.01345			1.19	17.46	0.11596	30	0.964	2.5	21.7	28
NMtnPr	Fraxinus americana	FRAM	dbh	crown ht	meters	1	loglogw1	-0.12157	2.00952	0.05384			1.67	17.59	0.05384	30	0.837	3	21	28
NMtnPr	Fraxinus americana	FRAM	age	dbh	centimeters	1/age^2	cub	2.8422	0.77951	0.03184	-0.00039		2.84	80.31	0.03732	31	0.972	2.9	89.2	27
NMtnPr	Fraxinus americana	FRAM	dbh	leaf area	sq. meters	1	loglogw1	-1.71342	6.01046	0.27589			1.93	1595.47	0.52525	27	0.899	5	2045.8	25
NMtnPr	Fraxinus americana	FRAM	dbh	tree ht	meters	1	loglogw1	0.42963	1.73177	0.03643			2.63	20.12	0.19086	30	0.849	4.5	25	28
NMtnPr	Fraxinus pennsylvanica	FRPE	dbh	age	years	1/dbh	cub	0.75084	0.26193	0.01658	-0.00011		0	97	1.08193	65	0.953	0	97	61
NMtnPr	Fraxinus pennsylvanica	FRPE	cdia	dbh	meters	1	loglogw1	0.53726	3.5649	0.03954			2.83	99.01	0.19885	64	0.925	2.9	121.6	62
NMtnPr	Fraxinus pennsylvanica	FRPE	dbh	crown dia	meters	1	loglogw1	-0.57933	2.29794	0.01727			1.12	18.81	0.13141	64	0.929	2.7	22.6	62
NMtnPr	Fraxinus pennsylvanica	FRPE	dbh	crown ht	meters	1/dbh	quad	2.48182	0.32121	-0.00159			3.38	18.67	0.12444	64	0.849	4	27	61
NMtnPr	Fraxinus pennsylvanica	FRPE	age	dbh	centimeters	1/age	quad	2.83395	1.44568	-0.00468			2.83	99.01	1.69983	65	0.972	2.9	121.6	62
NMtnPr	Fraxinus pennsylvanica	FRPE	dbh	leaf area	sq. meters	1/dbh^2	cub	-10.0478	3.33119	0.28544	-0.00168		1.65	1490.5	17.3598	56	0.87	9.7	2320.4	52
NMtnPr	Fraxinus pennsylvanica	FRPE	dbh	tree ht	meters	1/dbh	quad	2.75635	0.4068	-0.00206			3.89	22.87	0.14578	64	0.882	5	30	61
NMtnPr	Gleditsia triacanthos	GLTR	dbh	age	years	1/dbh^2	lin	-2.13193	0.83672				0	120	0.03007	64	0.939	0	86	62
NMtnPr	Gleditsia triacanthos	GLTR	cdia	dbh	meters	1/cdia^2	cub	11.1425	-4.40068	0.88116	-0.02288		2.82	101.75	0.632	63	0.931	2.9	111.3	59
NMtnPr	Gleditsia triacanthos	GLTR	dbh	crown dia	meters	1	loglogw1	-0.24887	2.08432	0.01423			1.45	19.1	0.11929	63	0.944	2.2	22.4	61
NMtnPr	Gleditsia triacanthos	GLTR	dbh	crown ht	meters	1/dbh	quad	1.24599	0.35965	-0.0017			2.25	20.2	0.12747	63	0.898	3	25.5	60
NMtnPr	Gleditsia triacanthos	GLTR	age	dbh	centimeters	1/age	quad	2.82434	1.53556	-0.00593			2.82	101.75	2.11416	64	0.964	2.9	111.3	61
NMtnPr	Gleditsia triacanthos	GLTR	dbh	leaf area	sq. meters	1/dbh	quad	-40.0981	9.9757	0.06452			4.56	1642.82	972.681	59	0.858	2.4	2365.8	56
NMtnPr	Gleditsia triacanthos	GLTR	dbh	tree ht	meters	1/sqrt(dbh)	cub	1.38978	0.56667	-0.00591	3e-05		2.94	25.65	0.79471	63	0.904	4.5	29.5	59
NMtnPr	Gymnocladus dioicus	GYDI	dbh	age	years	1	lin	3.58564	0.70421				0	75	20.9886	31	0.817	0	51	29
NMtnPr	Gymnocladus dioicus	GYDI	cdia	dbh	meters	1	expow1	1.35494	0.19489	0.02587			2.84	71.29	0.16084	30	0.937	2.9	67.3	28
NMtnPr	Gymnocladus dioicus	GYDI	dbh	crown dia	meters	1	cub	-0.98723	0.71893	-0.01472	0.00011		0.94	14.65	0.59736	30	0.937	2.5	14.6	26
NMtnPr	Gymnocladus dioicus	GYDI	dbh	crown ht	meters	1	cub	-1.74946	0.74463	-0.01399	0.0001		0.26	16	0.99165	30	0.922	1	16	26
NMtnPr	Gymnocladus dioicus	GYDI	age	dbh	centimeters	1/age^2	lin	2.84088	0.9127				2.84	66.73	0.13396	31	0.852	2.9	67.3	29
NMtnPr	Gymnocladus dioicus	GYDI	dbh	leaf area	sq. meters	1/dbh^2	quad	-29.5518	8.10424	0.08153			2.02	874.3	9.4142	30	0.814	2.5	869.6	27
NMtnPr	Gymnocladus dioicus	GYDI	dbh	tree ht	meters	1	cub	-0.72202	0.81403	-0.01494	0.0001		1.47	17.9	1.21477	30	0.919	3	18	26
NMtnPr	Malus spp.	MA2	dbh	age	years	1/dbh	lin	-0.65605	0.82497				0	50	1.5142	31	0.841	0	62	29
NMtnPr	Malus spp.	MA2	cdia	dbh	meters	1/cdia^2	quad	-0.49269	2.64501	0.08539			2.49	60.28	0.20306	30	0.962	2.5	64.5	27
NMtnPr	Malus spp.	MA2	dbh	crown dia	meters	1	loglogw1	-0.61927	2.27576	0.01644			0.91	13.53	0.12822	30	0.956	1.1	14.7	28
NMtnPr	Malus spp.	MA2	dbh	crown ht	meters	1/dbh	lin	1.24241	0.1605				1.64	10.92	0.05103	30	0.844	1.5	11	28
NMtnPr	Malus spp.	MA2	age	dbh	centimeters	1/age^2	lin	2.48841	1.15593				2.49	60.28	0.1813	31	0.873	2.5	64.5	29
NMtnPr	Malus spp.	MA2	dbh	leaf area	sq. meters	1/sqrt(dbh)	loglogw2	-1.30697	5.09803	0.05018			0.88	446.02	0.224	29	0.928	0.9	742.8	27
NMtnPr	Malus spp.	MA2	dbh	tree ht	meters	1/dbh	lin	2.23942	0.177				2.68	12.91	0.04558	30	0.88	2.5	13	28
NMtnPr	Pinus nigra	PINI	dbh	age	years	1/dbh^2	quad	-3.04502	1.12314	-0.00886			0	38	0.02511	33	0.931	0	44	30
NMtnPr	Pinus nigra	PINI	cdia	dbh	meters	1/cdia^2	cub	-4.8173	3.4504	0.69133	-0.04905		3.17	49.22	0.2254	33	0.977	2.9	56	29
NMtnPr	Pinus nigra	PINI	dbh	crown dia	meters	1/dbh^2	lin	1.31918	0.16347				1.84	9.36	0.00052	33	0.968	1.7	12.3	31
NMtnPr	Pinus nigra	PINI	dbh	crown ht	meters	1/dbh	lin	1.54799	0.19427				2.16	11.11	0.07418	33	0.879	1.5	14	31
NMtnPr	Pinus nigra	PINI	age	dbh	centimeters	1/age	cub	3.16683	0.6726	0.06006	-0.00121		3.17	49.22	2.39479	33	0.932	2.9	56	29
NMtnPr	Pinus nigra	PINI	dbh	leaf area	sq. meters	1/dbh^2	quad	-6.49746	2.68817	0.06807			2.7	290.68	1.67682	33	0.911	1.2	419.7	30
NMtnPr	Pinus nigra	PINI	dbh	tree ht	meters	1/dbh	lin	1.68036	0.22392				2.39	12.7	0.27734	33	0.903	2	15.5	31
NMtnPr	Pinus ponderosa	PIPO	dbh	age	years	1/dbh^2	lin	-1.11985	0.80845				0	86	0.08076	31	0.815	0	92	29
NMtnPr	Pinus ponderosa	PIPO	cdia	dbh	meters	1/cdia^2	cub	0.78755	1.05201	0.94489	-0.05089		2.84	60	0.34985	30	0.963	2.9	65.7	26
NMtnPr	Pinus ponderosa	PIPO	dbh	crown dia	meters	1/dbh	loglogw3	-0.61286	1.94995	0.00045			0.97	9.22	0.00045	30	0.981	1.1	11.7	28
NMtnPr	Pinus ponderosa	PIPO	dbh	crown ht	meters	1/sqrt(dbh)	expow2	0.73593	0.03772	0.01422			2.34	27.2	0.11924	30	0.847	1.5	22	28
NMtnPr	Pinus ponderosa	PIPO	age	dbh	centimeters	1/age	quad	2.84126	1.40282	-0.00741			2.84	68.7	2.04966	31	0.926	2.9	65.7	28
NMtnPr	Pinus ponderosa	PIPO	dbh	leaf area	sq. meters	1/sqrt(dbh)	loglogw2	-1.15262	4.74138	0.06384			1.36	389.88	0.25267	27	0.862	1.2	963.2	25
NMtnPr	Pinus ponderosa	PIPO	dbh	tree ht	meters	1/dbh^2	cub	0.28603	0.45281	-0.0113	0.00016		1.49	30.3	0.00331	30	0.912	1.5	24	26
NMtnPr	Picea pungens	PIPU	dbh	age	years	1/dbh	lin	1.33277	0.81042				0	87	3.61581	34	0.793	0	102	32
NMtnPr	Picea pungens	PIPU	cdia	dbh	meters	1/cdia^2	cub	5.64975	-4.26001	1.93078	-0.08896		2.12	71.87	0.87906	33	0.945	2.9	82.6	29
NMtnPr	Picea pungens	PIPU	dbh	crown dia	meters	1	loglogw1	-0.31203	1.76607	0.01236			2.64	9.6	0.1112	33	0.94	1.3	11.8	31
NMtnPr	Picea pungens	PIPU	dbh	crown ht	meters	1/dbh	lin	1.44529	0.24852				3.15	19.31	0.18894	33	0.86	1.7	23	31
NMtnPr	Picea pungens	PIPU	age	dbh	centimeters	1/sqrt(age)	quad	2.12167	1.60521	-0.00924			6.85	71.87	21.1287	34	0.894	2.9	82.6	31
NMtnPr	Picea pungens	PIPU	dbh	leaf area	sq. meters	1	loglogw1	-1.447	5.34169	0.16085			13.74	619.9	0.40106	31	0.919	2.4	1090.3	29
NMtnPr	Picea pungens	PIPU	dbh	tree ht	meters	1/dbh^2	cub	-0.03079	0.5545	-0.01147	0.00011		3.27	22.98	0.00459	33	0.908	1.7	26	29
NMtnPr	Populus sargentii	POSA	dbh	age	years	1/dbh	cub	1.36301	0.30232	0.01017	-5e-05		0	128	2.01418	54	0.899	0	102	50
NMtnPr	Populus sargentii	POSA	cdia	dbh	meters	1	loglogw1	1.35323	3.0058	0.10302			2.83	136.15	0.32097	53	0.696	2.9	162.6	51
NMtnPr	Populus sargentii	POSA	dbh	crown dia	meters	1/dbh	lin	4.09247	0.12238				4.44	20.76	0.11932	53	0.731	3.4	27	51
NMtnPr	Populus sargentii	POSA	dbh	crown ht	meters	1	quad	1.62352	0.28387	-0.00104			2.42	20.92	12.3507	53	0.609	3	26.5	50
NMtnPr	Populus sargentii	POSA	age	dbh	centimeters	1/age^2	quad	2.833	1.70027	-0.00515			2.83	136.15	0.12636	54	0.938	2.9	162.6	51
NMtnPr	Populus sargentii	POSA	dbh	leaf area	sq. meters	1	loglogw1	-3.84323	6.92621	0.50009			0.54	1876.55	0.70717	31	0.618	15.7	3411.2	29
NMtnPr	Populus sargentii	POSA	dbh	tree ht	meters	1/sqrt(dbh)	quad	2.57926	0.3106	-0.00106			3.45	25.28	1.67462	53	0.705	4.5	31	50
NMtnPr	Prunus spp.	PR	dbh	age	years	1/sqrt(dbh)	lin	-0.18282	0.76942				1	25	1.3479	25	0.916	0	30	23
NMtnPr	Prunus spp.	PR	cdia	dbh	meters	1/cdia^2	lin	-3.87404	3.90532				2.78	31.21	0.81184	25	0.818	1.6	31.8	23
NMtnPr	Prunus spp.	PR	dbh	crown dia	meters	1	lin	2.09804	0.18608				2.39	7.91	1.12764	25	0.712	1.5	8.6	23
NMtnPr	Prunus spp.	PR	dbh	crown ht	meters	1/dbh	loglogw3	0.74152	0.59251	0.00333			2.04	4.62	0.05773	25	0.687	2	6	23
NMtnPr	Prunus spp.	PR	age	dbh	centimeters	1/age	lin	1.59016	1.18497				1.59	31.21	0.71446	25	0.957	1.6	31.8	23
NMtnPr	Prunus spp.	PR	dbh	leaf area	sq. meters	1	loglogw1	1.421	2.32142	0.45149			6.05	86.23	0.67193	25	0.555	3.6	175	23
NMtnPr	Prunus spp.	PR	dbh	tree ht	meters	1	loglogw1	0.82696	0.81066	0.02697			2.22	6.29	0.16423	25	0.721	2	7.5	23
NMtnPr	Pyrus spp.	PY	dbh	age	years	1/dbh	quad	-0.80584	0.47861	0.02449			0	50	0.41926	29	0.948	0	42	26
NMtnPr	Pyrus spp.	PY	cdia	dbh	meters	1/cdia^2	cub	9.81955	-5.73722	2.10386	-0.13126		3.11	33.95	0.39681	28	0.867	2.9	35.1	24
NMtnPr	Pyrus spp.	PY	dbh	crown dia	meters	1	loglogw1	-0.66157	2.17452	0.04106			1.13	8.23	0.20264	28	0.852	1.3	10.8	26
NMtnPr	Pyrus spp.	PY	dbh	crown ht	meters	1/sqrt(dbh)	lin	1.17909	0.26565				2.01	10.2	0.60396	28	0.691	1	11.5	26
NMtnPr	Pyrus spp.	PY	age	dbh	centimeters	1/sqrt(age)	quad	3.11411	1.0985	-0.00964			3.11	33.95	1.18069	29	0.961	2.9	35.1	26
NMtnPr	Pyrus spp.	PY	dbh	leaf area	sq. meters	1/sqrt(dbh)	loglogw2	-0.97086	4.72794	0.09749			2.13	201.99	0.31223	25	0.807	2.3	329.7	23
NMtnPr	Pyrus spp.	PY	dbh	tree ht	meters	1/sqrt(dbh)	lin	2.0747	0.29284				2.99	12.02	0.47839	28	0.775	2	13	26
NMtnPr	Quercus macrocarpa	QUMA1	dbh	age	years	1/dbh^2	lin	-2.36714	0.92666				0	90	0.02866	34	0.943	0	85	32
NMtnPr	Quercus macrocarpa	QUMA1	cdia	dbh	meters	1/cdia^2	quad	1.69633	2.3785	0.09627			2.84	101.96	0.29599	33	0.957	2.9	99.4	30
NMtnPr	Quercus macrocarpa	QUMA1	dbh	crown dia	meters	1	loglogw1	-1.29532	2.82571	0.01755			0.64	20.97	0.13246	33	0.967	1.1	21.1	31
NMtnPr	Quercus macrocarpa	QUMA1	dbh	crown ht	meters	1/dbh^2	quad	1.56355	0.30396	-0.00111			2.42	20.99	0.0025	33	0.917	3	20	30
NMtnPr	Quercus macrocarpa	QUMA1	age	dbh	centimeters	1/age^2	lin	2.83898	1.10137				2.84	101.96	0.06958	34	0.942	2.9	99.4	32
NMtnPr	Quercus macrocarpa	QUMA1	dbh	leaf area	sq. meters	1	loglogw1	-3.74984	7.50938	0.1509			0.33	2572.14	0.38845	33	0.96	1.4	1801.1	31
NMtnPr	Quercus macrocarpa	QUMA1	dbh	tree ht	meters	1/dbh^2	quad	2.22933	0.38596	-0.00179			3.31	22.98	0.00218	33	0.947	4	23	30
NMtnPr	Tilia americana	TIAM	dbh	age	years	1/dbh	quad	0.05319	0.62775	0.00564			0	97	1.96844	33	0.909	0	87	30
NMtnPr	Tilia americana	TIAM	cdia	dbh	meters	1/cdia^2	cub	4.70109	-0.06367	0.68261	-0.02442		2.83	71.25	0.42008	32	0.96	2.9	85	28
NMtnPr	Tilia americana	TIAM	dbh	crown dia	meters	1	loglogw1	-1.32649	2.69992	0.01386			0.6	13.51	0.11773	32	0.955	1.3	18.1	30
NMtnPr	Tilia americana	TIAM	dbh	crown ht	meters	1/dbh	quad	0.82048	0.36878	-0.0014			1.85	20.01	0.06855	32	0.942	3	23	29
NMtnPr	Tilia americana	TIAM	age	dbh	centimeters	1/age	quad	2.83048	1.41347	-0.0073			2.83	71.25	1.73863	33	0.956	2.9	85	30
NMtnPr	Tilia americana	TIAM	dbh	leaf area	sq. meters	1/sqrt(dbh)	loglogw2	-3.41407	7.25039	0.01662			0.28	1336.67	0.12893	31	0.972	2.4	2621	29
NMtnPr	Tilia americana	TIAM	dbh	tree ht	meters	1/dbh	quad	2.32773	0.37609	-0.00126			3.38	22.73	0.09301	32	0.931	4.5	26	29
NMtnPr	Tilia cordata	TICO	dbh	age	years	1/dbh^2	cub	-3.47689	1.41065	-0.03872	0.00057		0	72	0.02646	34	0.94	0	77	30
NMtnPr	Tilia cordata	TICO	cdia	dbh	meters	1/cdia^2	quad	1.04819	2.02989	0.18027			2.4	60.68	0.3936	33	0.945	2.9	64.6	30
NMtnPr	Tilia cordata	TICO	dbh	crown dia	meters	1/sqrt(dbh)	quad	-0.05873	0.38696	-0.00307			0.85	12.12	0.13025	33	0.956	1.7	13.3	30
NMtnPr	Tilia cordata	TICO	dbh	crown ht	meters	1	loglogw1	-0.67173	2.45389	0.01985			0.86	16.6	0.01985	33	0.949	1.5	20	31
NMtnPr	Tilia cordata	TICO	age	dbh	centimeters	1/sqrt(age)	quad	2.40466	1.61553	-0.0112			2.4	60.68	4.45205	34	0.967	2.9	64.6	31
NMtnPr	Tilia cordata	TICO	dbh	leaf area	sq. meters	1	loglogw1	-2.63617	6.58481	0.16347			0.42	870.71	0.40432	32	0.944	0.9	811.3	30
NMtnPr	Tilia cordata	TICO	dbh	tree ht	meters	1/dbh	quad	1.36928	0.45759	-0.00277			2.45	18.92	0.06891	33	0.949	3	24	30
NMtnPr	Ulmus americana	ULAM	dbh	age	years	1	quad	5.06523	1.28595	-0.00574			0	93	223.021	61	0.557	0	94	58
NMtnPr	Ulmus americana	ULAM	cdia	dbh	meters	1	lin	0.24032	4.47521				2.88	130	153.414	61	0.841	2.9	139.5	59
NMtnPr	Ulmus americana	ULAM	dbh	crown dia	meters	1/dbh	cub	1.02609	0.34005	-0.00281	1e-05		1.98	23.56	0.08987	61	0.948	1.5	30.8	57
NMtnPr	Ulmus americana	ULAM	dbh	crown ht	meters	1/dbh	cub	0.44998	0.55096	-0.00666	3e-05		1.98	18.1	0.16173	61	0.89	1.5	24	57
NMtnPr	Ulmus americana	ULAM	age	dbh	centimeters	1/age	cub	2.88323	3.06598	-0.05448	0.00037		2.88	112.89	9.34625	61	0.894	2.9	139.5	57
NMtnPr	Ulmus americana	ULAM	dbh	leaf area	sq. meters	1/dbh	cub	-17.8708	7.8889	-0.00123	0.00092		4.89	2181.59	2004.12	49	0.87	2.8	3548.6	45
NMtnPr	Ulmus americana	ULAM	dbh	tree ht	meters	1/sqrt(dbh)	cub	1.2628	0.59924	-0.00631	2e-05		2.94	22.75	0.96294	61	0.885	2.6	28.5	57
NMtnPr	Ulmus pumila	ULPU	dbh	age	years	1/dbh	quad	-0.89475	0.86998	-0.00228			0	105	2.12217	62	0.859	0	92	59
NMtnPr	Ulmus pumila	ULPU	cdia	dbh	meters	1/cdia^2	cub	1.55722	0.59647	0.43296	-0.01015		3.77	119.63	0.82027	62	0.943	3.8	143.3	58
NMtnPr	Ulmus pumila	ULPU	dbh	crown dia	meters	1/dbh	cub	0.7902	0.36031	-0.00305	1e-05		2.11	20.61	0.05621	62	0.944	1.5	25.9	58
NMtnPr	Ulmus pumila	ULPU	dbh	crown ht	meters	1	cub	0.16899	0.65114	-0.00782	3e-05		2.51	19.31	5.61867	62	0.858	1.4	23.5	58
NMtnPr	Ulmus pumila	ULPU	age	dbh	centimeters	1/age	quad	3.76769	1.89111	-0.0075			3.77	119.63	8.47575	62	0.92	3.8	143.3	59
NMtnPr	Ulmus pumila	ULPU	dbh	leaf area	sq. meters	1/dbh	lin	-59.2755	14.2167				21.07	1641.51	2177.79	48	0.853	2.7	2478	46
NMtnPr	Ulmus pumila	ULPU	dbh	tree ht	meters	1	cub	1.25363	0.65406	-0.00699	3e-05		3.62	22.61	5.64738	62	0.886	2.3	27.5	58
NoCalC	Acacia melanoxylon	ACME	dbh	age	years	1/dbh	quad	-0.07717	1.03847	-0.00387			1	74	1.13403	35	0.941	0	80	32
NoCalC	Acacia melanoxylon	ACME	cdia	dbh	meters	1/cdia^2	quad	0.48486	2.88322	0.17048			2.78	99.02	1.28772	31	0.927	1.5	130.9	28
NoCalC	Acacia melanoxylon	ACME	dbh	crown dia	meters	1/sqrt(dbh)	quad	0.72517	0.23255	-0.00072			1.37	16.71	0.31444	31	0.941	0.3	20.7	28
NoCalC	Acacia melanoxylon	ACME	dbh	crown ht	meters	1/sqrt(dbh)	loglogw2	0.33845	1.43614	0.01374			2.14	13.47	0.1172	31	0.911	1.2	23.1	29
NoCalC	Acacia melanoxylon	ACME	age	dbh	centimeters	1/age^2	cub	2.85114	-0.12224	0.05596	-0.0005		2.78	99.03	0.11337	35	0.907	1.5	130.9	31
NoCalC	Acacia melanoxylon	ACME	dbh	leaf area	sq. meters	1	loglogw1	0.38175	3.72792	0.30567			6.38	491.2	0.55287	25	0.895	2	759.3	23
NoCalC	Acacia melanoxylon	ACME	dbh	tree ht	meters	1/sqrt(dbh)	loglogw2	0.50713	1.54757	0.00894			2.6	18.45	0.09454	31	0.948	1.4	29.4	29
NoCalC	Acer palmatum	ACPA	dbh	age	years	1/dbh	cub	-2.14827	1.39244	0.00738	-0.00021		0	64	0.70595	38	0.97	0	63	34
NoCalC	Acer palmatum	ACPA	cdia	dbh	meters	1/cdia^2	lin	-0.767	4.15225				2.85	47.38	0.67011	35	0.931	2.5	71.1	33
NoCalC	Acer palmatum	ACPA	dbh	crown dia	meters	1	loglogw1	-1.01932	2.48188	0.03998			0.78	10.57	0.19994	35	0.928	0.7	14.5	33
NoCalC	Acer palmatum	ACPA	dbh	crown ht	meters	1/dbh	lin	0.90353	0.11475				1.23	6.34	0.05462	35	0.771	0.9	8.3	33
NoCalC	Acer palmatum	ACPA	age	dbh	centimeters	1/age^2	cub	2.84767	0.23083	0.02511	-0.00028		2.85	47.39	0.02437	38	0.944	2.5	71.1	34
NoCalC	Acer palmatum	ACPA	dbh	leaf area	sq. meters	1	loglogw1	-2.21556	5.79413	0.37159			1.3	368.78	0.60958	33	0.888	0.5	674.3	31
NoCalC	Acer palmatum	ACPA	dbh	tree ht	meters	1/sqrt(dbh)	lin	2.02054	0.15818				2.47	9.52	0.36403	35	0.819	1.9	12	33
NoCalC	Cinnamomum camphora	CICA	dbh	age	years	1	quad	-4.02378	1.77648	-0.00804			0	110	53.5794	70	0.907	0	103	67
NoCalC	Cinnamomum camphora	CICA	cdia	dbh	meters	1	loglogw1	1.75966	2.46286	0.04574			2.84	80	0.21387	69	0.9	2.9	112.3	67
NoCalC	Cinnamomum camphora	CICA	dbh	crown dia	meters	1/dbh^2	quad	0.27422	0.27039	-0.00112			1.03	16.23	0.00107	69	0.964	1.1	17.3	66
NoCalC	Cinnamomum camphora	CICA	dbh	crown ht	meters	1/dbh	quad	1.37819	0.11341	-0.00055			1.7	7.2	0.05733	69	0.672	1.2	11.4	66
NoCalC	Cinnamomum camphora	CICA	age	dbh	centimeters	1/age	quad	2.84131	0.57502	0.00312			2.84	103.88	1.24802	70	0.97	2.9	112.3	67
NoCalC	Cinnamomum camphora	CICA	dbh	leaf area	sq. meters	1	loglogw1	-1.51267	4.94387	0.33528			1.71	525.01	0.57903	57	0.794	2	1183.4	55
NoCalC	Cinnamomum camphora	CICA	dbh	tree ht	meters	1/sqrt(dbh)	quad	2.54056	0.21062	-0.00102			3.13	13.43	0.4109	69	0.792	2.5	16.6	66
NoCalC	Eucalyptus globulus	EUGL	dbh	age	years	1/dbh	cub	0.68131	0.45914	-0.00086	1e-05		0	88	0.57336	67	0.952	0	123	63
NoCalC	Eucalyptus globulus	EUGL	cdia	dbh	meters	1	loglogw1	1.60965	2.69394	0.07296			2.79	140.01	0.27011	66	0.889	2.9	184	64
NoCalC	Eucalyptus globulus	EUGL	dbh	crown dia	meters	1/dbh	quad	0.69946	0.22521	-0.00051			1.11	22.25	0.11481	66	0.9	1.2	29.2	63
NoCalC	Eucalyptus globulus	EUGL	dbh	crown ht	meters	1/sqrt(dbh)	cub	0.38422	0.45643	-0.00337	1e-05		1.21	25.74	3.11888	66	0.708	2.5	37.3	62
NoCalC	Eucalyptus globulus	EUGL	age	dbh	centimeters	1/sqrt(age)	quad	1.84032	2.33198	-0.00865			1.84	140.07	16.4723	67	0.967	2.9	184	64
NoCalC	Eucalyptus globulus	EUGL	dbh	leaf area	sq. meters	1/dbh	loglogw3	-0.2367	4.44786	0.00396			0.96	1278.78	0.06291	18	0.983	4.8	2314.1	16
NoCalC	Eucalyptus globulus	EUGL	dbh	tree ht	meters	1/sqrt(dbh)	cub	1.74868	0.74848	-0.00619	2e-05		3.11	34.98	5.79874	64	0.71	3.2	42.3	60
NoCalC	Fraxinus velutina	FRVE	dbh	age	years	1	quad	2.07232	1.19789	-0.00721			0	64	59.8867	33	0.772	0	63	30
NoCalC	Fraxinus velutina	FRVE	cdia	dbh	meters	1/cdia^2	cub	2.67625	0.28988	0.52924	-0.01795		3.51	78	0.48987	32	0.943	2.9	78.9	28
NoCalC	Fraxinus velutina	FRVE	dbh	crown dia	meters	1	loglogw1	-0.79158	2.39893	0.02292			0.94	16.36	0.15139	32	0.939	1.1	17.9	30
NoCalC	Fraxinus velutina	FRVE	dbh	crown ht	meters	1	loglogw1	-0.03158	1.64567	0.04846			1.63	11.4	0.22013	32	0.773	1.4	13.7	30
NoCalC	Fraxinus velutina	FRVE	age	dbh	centimeters	1/age^2	quad	2.84341	0.65806	0.00963			2.84	84.4	0.12178	33	0.882	2.9	78.9	30
NoCalC	Fraxinus velutina	FRVE	dbh	leaf area	sq. meters	1	loglogw1	-0.80328	4.81997	0.32229			3.24	707.1	0.56771	29	0.821	1.6	694.8	27
NoCalC	Fraxinus velutina	FRVE	dbh	tree ht	meters	1	loglogw1	0.76815	1.38864	0.0221			3.3	17.18	0.14868	32	0.842	4	21.3	30
NoCalC	Ginkgo biloba	GIBI	dbh	age	years	1/dbh	quad	0.04947	1.93819	-0.01907			0	58	2.3726	34	0.91	0	58	31
NoCalC	Ginkgo biloba	GIBI	cdia	dbh	meters	1	loglogw1	1.40479	2.39723	0.04898			2.07	39.15	0.22133	33	0.954	0.5	38.7	31
NoCalC	Ginkgo biloba	GIBI	dbh	crown dia	meters	1/dbh^2	quad	0.34638	0.37483	-0.0035			1.11	9.66	0.00298	33	0.958	0.6	11.5	30
NoCalC	Ginkgo biloba	GIBI	dbh	crown ht	meters	1/sqrt(dbh)	quad	0.70307	0.37326	-0.00412			1.46	9	0.37977	33	0.863	0.6	11.6	30
NoCalC	Ginkgo biloba	GIBI	age	dbh	centimeters	1/sqrt(age)	lin	2.07017	0.63933				2.07	39.15	5.21385	34	0.9	0.5	38.7	32
NoCalC	Ginkgo biloba	GIBI	dbh	leaf area	sq. meters	1	loglogw1	0.56279	3.65277	0.42631			5.04	254.57	0.65293	32	0.878	0.2	370.1	30
NoCalC	Ginkgo biloba	GIBI	dbh	tree ht	meters	1/sqrt(dbh)	quad	1.0447	0.56054	-0.00713			2.17	12.06	0.44889	33	0.91	1	15	30
NoCalC	Liquidambar styraciflua	LIST	dbh	age	years	1/dbh	cub	-0.75457	1.01542	-0.00924	9e-05		0	100	0.75669	37	0.944	0	100	33
NoCalC	Liquidambar styraciflua	LIST	cdia	dbh	meters	1/cdia^2	cub	1.76099	0.82463	0.52214	-0.01992		2.8	62	0.6964	37	0.936	2.5	100	33
NoCalC	Liquidambar styraciflua	LIST	dbh	crown dia	meters	1/dbh	quad	0.42238	0.29796	-0.00131			1.25	17.17	0.06011	37	0.945	0.7	17.4	34
NoCalC	Liquidambar styraciflua	LIST	dbh	crown ht	meters	1/dbh	cub	-0.54095	0.53287	-0.00872	5e-05		0.89	16.49	0.20479	37	0.814	0.3	17.3	33
NoCalC	Liquidambar styraciflua	LIST	age	dbh	centimeters	1/age	quad	2.80359	1.29151	-0.00299			2.8	102.01	1.62906	37	0.959	2.5	100	34
NoCalC	Liquidambar styraciflua	LIST	dbh	leaf area	sq. meters	1	loglogw1	-1.47634	5.49634	0.29671			2	1243.85	0.54471	33	0.917	0.2	1163.7	31
NoCalC	Liquidambar styraciflua	LIST	dbh	tree ht	meters	1/dbh	cub	0.57478	0.62687	-0.00837	4e-05		2.27	22.71	0.20583	37	0.896	1.2	22.5	33
NoCalC	Liriodendron tulipifera	LITU	dbh	age	years	1/sqrt(dbh)	quad	-4.17337	1.63495	-0.01131			0	91	6.42148	34	0.897	0	58	31
NoCalC	Liriodendron tulipifera	LITU	cdia	dbh	meters	1/cdia^2	lin	-11.2012	6.04137				2.84	70	0.50294	33	0.92	2.9	74.3	31
NoCalC	Liriodendron tulipifera	LITU	dbh	crown dia	meters	1/dbh	quad	1.76138	0.20441	-0.00083			2.34	13.06	0.02162	33	0.918	3	12.6	30
NoCalC	Liriodendron tulipifera	LITU	dbh	crown ht	meters	1/dbh	loglogw3	-0.33074	1.82002	0.00085			1.23	11.25	0.02917	33	0.897	2.7	11.7	31
NoCalC	Liriodendron tulipifera	LITU	age	dbh	centimeters	1/age^2	lin	2.84107	0.89367				2.84	84.17	0.05246	34	0.935	2.9	74.3	32
NoCalC	Liriodendron tulipifera	LITU	dbh	leaf area	sq. meters	1	loglogw1	-0.28328	4.20676	0.19729			3.54	438.88	0.44417	34	0.832	4.3	554.4	32
NoCalC	Liriodendron tulipifera	LITU	dbh	tree ht	meters	1/dbh	quad	2.98011	0.35071	-0.00194			3.96	18.78	0.06872	33	0.892	4.8	18.9	30
NoCalC	Magnolia grandiflora	MAGR	dbh	age	years	1	cub	-3.10949	1.8431	-0.01631	6e-05		0	84	23.2804	38	0.955	0	83	34
NoCalC	Magnolia grandiflora	MAGR	cdia	dbh	meters	1/cdia^2	cub	4.05898	-1.39782	0.92187	-0.03509		3.02	70	1.07891	37	0.914	2.9	110	33
NoCalC	Magnolia grandiflora	MAGR	dbh	crown dia	meters	1	loglogw1	-0.71525	2.28462	0.02997			1.07	16.01	0.17312	37	0.935	0.8	15.7	35
NoCalC	Magnolia grandiflora	MAGR	dbh	crown ht	meters	1/dbh	quad	0.71693	0.19177	-0.00098			1.01	9.21	0.07591	37	0.811	0.6	12.9	34
NoCalC	Magnolia grandiflora	MAGR	age	dbh	centimeters	1/age	quad	3.02259	0.37655	0.00889			3.02	97.39	0.99456	38	0.97	2.9	110	35
NoCalC	Magnolia grandiflora	MAGR	dbh	leaf area	sq. meters	1	loglogw1	-1.92023	5.4397	0.28917			1.52	690.02	0.53774	36	0.895	0.7	670.6	34
NoCalC	Magnolia grandiflora	MAGR	dbh	tree ht	meters	1	loglogw1	0.04859	1.73726	0.03172			1.9	14.9	0.1781	37	0.886	1.9	17.6	35
NoCalC	Pistacia chinensis	PICH	dbh	age	years	1/dbh	lin	-0.89272	1.08856				0	45	0.71438	37	0.882	0	33	35
NoCalC	Pistacia chinensis	PICH	cdia	dbh	meters	1	loglogw1	1.17431	2.34257	0.05251			2.82	36.95	0.22915	36	0.883	2.3	30.7	34
NoCalC	Pistacia chinensis	PICH	dbh	crown dia	meters	1/dbh	lin	0.88933	0.32314				1.8	12.83	0.05866	36	0.887	1.4	12.1	34
NoCalC	Pistacia chinensis	PICH	dbh	crown ht	meters	1/sqrt(dbh)	cub	-0.07461	0.57364	-0.02867	0.00054		1.33	9.07	0.15728	36	0.719	0.7	6.4	32
NoCalC	Pistacia chinensis	PICH	age	dbh	centimeters	1/age	lin	2.81535	0.75851				2.82	36.95	0.57138	37	0.922	2.3	30.7	35
NoCalC	Pistacia chinensis	PICH	dbh	leaf area	sq. meters	1	loglogw1	0.23175	3.93438	0.25154			5.66	231.51	0.50154	35	0.828	1.8	182.5	33
NoCalC	Pistacia chinensis	PICH	dbh	tree ht	meters	1/sqrt(dbh)	lin	2.73417	0.22614				3.37	11.09	0.14048	36	0.835	2.5	10.6	34
NoCalC	Pinus radiata	PIRA	dbh	age	years	1/dbh	cub	-2.08097	0.9783	-0.00747	4e-05		0	70	0.63181	35	0.953	0	73	31
NoCalC	Pinus radiata	PIRA	cdia	dbh	meters	1/sqrt(cdia)	lin	-6.7193	6.07068				2.81	115.03	49.9294	34	0.855	2.5	127.2	32
NoCalC	Pinus radiata	PIRA	dbh	crown dia	meters	1/sqrt(dbh)	lin	2.38939	0.14434				2.79	18.99	0.50202	34	0.879	2	22.5	32
NoCalC	Pinus radiata	PIRA	dbh	crown ht	meters	1/dbh	lin	1.57882	0.16713				2.05	20.8	0.2512	34	0.784	1.7	25.8	32
NoCalC	Pinus radiata	PIRA	age	dbh	centimeters	1/age	lin	2.80551	1.60318				2.81	115.03	3.3232	35	0.965	2.5	127.2	33
NoCalC	Pinus radiata	PIRA	dbh	leaf area	sq. meters	1	loglogw1	-0.77711	4.65043	0.36139			3.19	769.83	0.60116	21	0.832	3	1954.5	19
NoCalC	Pinus radiata	PIRA	dbh	tree ht	meters	1/dbh	quad	0.34861	0.39871	-0.00177			1.45	22.75	0.40148	34	0.815	1.8	31.6	31
NoCalC	Pittosporum undulatum	PIUN	dbh	age	years	1	loglogw1	-0.51318	3.13952	0.11729			1	87	0.34247	31	0.863	1	53	29
NoCalC	Pittosporum undulatum	PIUN	cdia	dbh	meters	1/sqrt(cdia)	loglogw2	1.55025	2.53445	0.02732			1.54	53.62	0.16529	31	0.924	2.5	53.3	29
NoCalC	Pittosporum undulatum	PIUN	dbh	crown dia	meters	1/sqrt(dbh)	loglogw2	-0.41356	1.91669	0.00729			0.65	9.55	0.0854	31	0.934	1.2	11.6	29
NoCalC	Pittosporum undulatum	PIUN	dbh	crown ht	meters	1/sqrt(dbh)	lin	1.91742	0.11699				2.11	8.01	0.56717	31	0.551	1.2	10.9	29
NoCalC	Pittosporum undulatum	PIUN	age	dbh	centimeters	1	loglogw1	1.08072	1.9017	0.10108			1.68	52.08	0.31792	31	0.828	2.5	53.3	29
NoCalC	Pittosporum undulatum	PIUN	dbh	leaf area	sq. meters	1/dbh	loglogw3	-0.98056	4.43138	0.01816			0.36	271.54	0.13475	29	0.915	1.2	630.3	27
NoCalC	Pittosporum undulatum	PIUN	dbh	tree ht	meters	1	quad	2.28894	0.29578	-0.00235			2.78	11.32	1.2861	31	0.815	2	12	28
NoCalC	Platanus x acerifolia	PLAC	dbh	age	years	1/sqrt(dbh)	cub	0.79883	0.63561	0.00534	-5e-05		0	76	2.83647	70	0.951	0	68	66
NoCalC	Platanus x acerifolia	PLAC	cdia	dbh	meters	1	loglogw1	0.69423	3.27394	0.03957			2.83	90	0.19891	69	0.886	2.9	114.1	67
NoCalC	Platanus x acerifolia	PLAC	dbh	crown dia	meters	1/dbh^2	quad	0.69918	0.36544	-0.0018			1.72	19.29	0.00143	69	0.953	2.5	23.7	66
NoCalC	Platanus x acerifolia	PLAC	dbh	crown ht	meters	1/dbh	loglogw3	0.47199	1.28262	0.00199			2.35	12.69	0.04457	69	0.618	3.3	22	67
NoCalC	Platanus x acerifolia	PLAC	age	dbh	centimeters	1/age	quad	2.83419	1.1265	0.00238			2.83	102.17	1.18657	70	0.981	2.9	114.1	67
NoCalC	Platanus x acerifolia	PLAC	dbh	leaf area	sq. meters	1/sqrt(dbh)	loglogw2	-0.01992	4.22859	0.04244			3.55	797.05	0.20601	47	0.8	12	1531.4	45
NoCalC	Platanus x acerifolia	PLAC	dbh	tree ht	meters	1/dbh	loglogw3	0.66567	1.51202	0.00088			3.05	20.7	0.02971	69	0.836	4.9	28.7	67
NoCalC	Prunus cerasifera	PRCE	dbh	age	years	1/dbh	quad	-2.4876	1.57804	-0.01441			0	50	1.13855	31	0.876	0	43	28
NoCalC	Prunus cerasifera	PRCE	cdia	dbh	meters	1	loglogw1	1.29752	2.72333	0.10606			3.42	43	0.32566	30	0.725	2.9	53.5	28
NoCalC	Prunus cerasifera	PRCE	dbh	crown dia	meters	1	loglogw1	-0.08704	1.63242	0.03852			1.52	8.93	0.19626	30	0.758	1.5	11.2	28
NoCalC	Prunus cerasifera	PRCE	dbh	crown ht	meters	1/dbh	loglogw3	-0.66682	1.95876	0.00202			0.92	8.25	0.04495	30	0.891	1.2	8.4	28
NoCalC	Prunus cerasifera	PRCE	age	dbh	centimeters	1/age^2	quad	2.84436	0.56298	0.00934			2.84	54.36	0.05422	31	0.911	2.9	53.5	28
NoCalC	Prunus cerasifera	PRCE	dbh	leaf area	sq. meters	1/sqrt(dbh)	loglogw2	-0.50955	4.15045	0.05051			2.16	231.52	0.22475	30	0.826	2.7	222.2	28
NoCalC	Prunus cerasifera	PRCE	dbh	tree ht	meters	1	loglogw1	0.40011	1.39656	0.01612			2.28	10.42	0.12698	30	0.846	2.5	10.4	28
NoCalC	Pyrus calleryana	PYCA	dbh	age	years	1	lin	1.85924	0.79601				0	50	15.5389	30	0.902	0	43	28
NoCalC	Pyrus calleryana	PYCA	cdia	dbh	meters	1/cdia^2	cub	3.21605	-1.00726	0.88396	-0.04212		1.69	45	0.6042	29	0.919	2.9	53.1	25
NoCalC	Pyrus calleryana	PYCA	dbh	crown dia	meters	1	loglogw1	-0.50199	2.15116	0.03253			0.11	12.49	0.18037	29	0.916	1.1	14.5	27
NoCalC	Pyrus calleryana	PYCA	dbh	crown ht	meters	1	loglogw1	0.28019	1.2829	0.10549			0.53	8.14	0.32479	29	0.538	1.6	11.8	27
NoCalC	Pyrus calleryana	PYCA	age	dbh	centimeters	1	lin	0.55185	1.13712				0.55	57.41	22.1977	30	0.902	2.9	53.1	28
NoCalC	Pyrus calleryana	PYCA	dbh	leaf area	sq. meters	1/dbh	loglogw3	0.6298	3.53138	0.01649			0.1	427.34	0.12839	28	0.878	5.8	729.5	26
NoCalC	Pyrus calleryana	PYCA	dbh	tree ht	meters	1	loglogw1	0.80394	1.21988	0.03387			0.86	12.44	0.18404	29	0.77	3.3	14.5	27
NoCalC	Pyrus kawakamii	PYKA	dbh	age	years	1/sqrt(dbh)	cub	-0.73974	0.56603	0.01225	-0.00018		0	50	1.60406	35	0.961	0	43	31
NoCalC	Pyrus kawakamii	PYKA	cdia	dbh	meters	1/cdia	lin	-4.89161	4.3895				2.83	67.83	3.57146	34	0.93	2.9	63.9	32
NoCalC	Pyrus kawakamii	PYKA	dbh	crown dia	meters	1/dbh	quad	0.99604	0.29207	-0.00136			1.81	14.56	0.04442	34	0.944	1.6	16.6	31
NoCalC	Pyrus kawakamii	PYKA	dbh	crown ht	meters	1/sqrt(dbh)	lin	1.64501	0.11198				1.96	9.24	0.23046	34	0.79	1.5	10	32
NoCalC	Pyrus kawakamii	PYKA	age	dbh	centimeters	1/age	lin	2.83176	1.30003				2.83	67.83	1.01083	35	0.976	2.9	63.9	33
NoCalC	Pyrus kawakamii	PYKA	dbh	leaf area	sq. meters	1	loglogw1	-0.56606	4.36954	0.3546			3.54	371.22	0.59549	22	0.799	2.3	481.2	20
NoCalC	Pyrus kawakamii	PYKA	dbh	tree ht	meters	1	quad	1.81068	0.32025	-0.00236			2.7	12.65	1.4918	34	0.842	2.5	14.1	31
NoCalC	Quercus agrifolia	QUAG	dbh	age	years	1/dbh	quad	-0.79896	0.80279	-0.00169			0	100	0.66476	66	0.961	0	103	63
NoCalC	Quercus agrifolia	QUAG	cdia	dbh	meters	1	loglogw1	1.62756	2.54237	0.0562			1.56	110	0.23706	65	0.926	1	155.2	63
NoCalC	Quercus agrifolia	QUAG	dbh	crown dia	meters	1/dbh	quad	0.35867	0.27404	-0.00079			0.78	23.7	0.10137	65	0.939	0.8	28	62
NoCalC	Quercus agrifolia	QUAG	dbh	crown ht	meters	1	cub	0.10736	0.28514	-0.00312	1e-05		0.54	15	5.27852	65	0.554	0.6	15.7	61
NoCalC	Quercus agrifolia	QUAG	age	dbh	centimeters	1/sqrt(age)	lin	1.55732	1.48691				1.56	150.25	0.31792	66	0.963	1	155.2	64
NoCalC	Quercus agrifolia	QUAG	dbh	leaf area	sq. meters	1/dbh^2	quad	-2.44397	2.13252	0.06884			1.04	1871.96	14.8988	43	0.703	0.2	1440.4	40
NoCalC	Quercus agrifolia	QUAG	dbh	tree ht	meters	1	cub	2.00172	0.32851	-0.00331	1e-05		2.51	20.46	5.09622	65	0.688	1.6	20.2	61
NoCalC	Robinia pseudoacacia	ROPS	dbh	age	years	1/dbh	cub	-1.94296	1.18079	-0.01361	9e-05		0	50	0.35434	34	0.964	0	53	30
NoCalC	Robinia pseudoacacia	ROPS	cdia	dbh	meters	1	loglogw1	0.19644	3.97132	0.1163			2.85	69.5	0.34102	33	0.827	2.5	87.9	31
NoCalC	Robinia pseudoacacia	ROPS	dbh	crown dia	meters	1	loglogw1	0.43058	1.44875	0.02337			2.4	12.59	0.15288	33	0.871	1.9	15.2	31
NoCalC	Robinia pseudoacacia	ROPS	dbh	crown ht	meters	1/sqrt(dbh)	loglogw2	0.1521	1.50429	0.01433			1.85	10.92	0.1197	33	0.81	1.7	18.8	31
NoCalC	Robinia pseudoacacia	ROPS	age	dbh	centimeters	1/age^2	cub	2.84813	0.18509	0.07077	-0.00096		2.85	69.5	0.06569	34	0.957	2.5	87.9	30
NoCalC	Robinia pseudoacacia	ROPS	dbh	leaf area	sq. meters	1	loglogw1	1.59076	3.02005	0.61611			22.5	480.88	0.78492	28	0.542	3.8	949.6	26
NoCalC	Robinia pseudoacacia	ROPS	dbh	tree ht	meters	1/dbh^2	quad	2.94674	0.36612	-0.00257			3.97	15.98	0.00392	33	0.904	3.7	24	30
NoCalC	Sequoia sempervirens	SESE	dbh	age	years	1/dbh	cub	-0.79721	0.64649	-0.00331	2e-05		0	76	0.37457	62	0.959	0	103	58
NoCalC	Sequoia sempervirens	SESE	cdia	dbh	meters	1/cdia^2	lin	-17.4141	9.78409				2.8	130	4.83165	61	0.822	2.5	190.9	59
NoCalC	Sequoia sempervirens	SESE	dbh	crown dia	meters	1/sqrt(dbh)	quad	2.26065	0.12545	-0.00033			2.61	13.77	0.28401	61	0.828	2	16	58
NoCalC	Sequoia sempervirens	SESE	dbh	crown ht	meters	1/dbh	quad	0.86414	0.36728	-0.00106			1.88	32.23	0.25531	61	0.892	2	38.5	58
NoCalC	Sequoia sempervirens	SESE	age	dbh	centimeters	1/age	lin	2.79785	1.99742				2.8	154.6	3.37362	62	0.975	2.5	190.9	60
NoCalC	Sequoia sempervirens	SESE	dbh	leaf area	sq. meters	1/sqrt(dbh)	loglogw2	0.09992	4.23804	0.0282			3.84	1256.38	0.16792	28	0.951	3.3	3582.3	26
NoCalC	Sequoia sempervirens	SESE	dbh	tree ht	meters	1/dbh	quad	1.8397	0.44555	-0.00144			3.07	36.19	0.4084	61	0.871	2.5	51	58
NoCalC	Ulmus americana	ULAM	dbh	age	years	1/dbh	quad	-0.87407	0.96487	-0.00354			0	85	0.70392	60	0.965	0	68	57
NoCalC	Ulmus americana	ULAM	cdia	dbh	meters	1/cdia^2	cub	1.01923	0.19042	0.58485	-0.01912		2.35	82	1.14985	59	0.925	2	120.1	55
NoCalC	Ulmus americana	ULAM	dbh	crown dia	meters	1	loglogw1	-0.02126	1.91598	0.03713			1.45	20.01	0.19269	59	0.923	1.1	23.2	57
NoCalC	Ulmus americana	ULAM	dbh	crown ht	meters	1/sqrt(dbh)	lin	2.01295	0.14025				2.34	19.11	1.3239	59	0.749	1.4	21.2	57
NoCalC	Ulmus americana	ULAM	age	dbh	centimeters	1/age	lin	2.3541	1.40641				2.35	121.9	3.31433	60	0.961	2	120.1	58
NoCalC	Ulmus americana	ULAM	dbh	leaf area	sq. meters	1	loglogw1	-0.41544	4.5763	0.41124			3.24	1059.27	0.64128	41	0.891	0.4	1790.3	39
NoCalC	Ulmus americana	ULAM	dbh	tree ht	meters	1/sqrt(dbh)	lin	3.31301	0.21583				3.82	29.62	1.89393	59	0.832	2.2	29.9	57
NoCalC	Ulmus parvifolia	ULPA	dbh	age	years	1/sqrt(dbh)	lin	0.39973	0.96105				2	44	5.54416	33	0.925	0	55	31
NoCalC	Ulmus parvifolia	ULPA	cdia	dbh	meters	1/cdia^2	cub	3.13212	-1.09896	0.5874	-0.0219		2.85	48.79	0.26906	32	0.95	2.5	62	28
NoCalC	Ulmus parvifolia	ULPA	dbh	crown dia	meters	1	loglogw1	-0.37252	2.26842	0.02963			1.38	15.3	0.17215	32	0.951	0.9	17.6	30
NoCalC	Ulmus parvifolia	ULPA	dbh	crown ht	meters	1/dbh^2	quad	1.06251	0.36615	-0.00528			2.06	7.4	0.00328	32	0.837	1.9	13	29
NoCalC	Ulmus parvifolia	ULPA	age	dbh	centimeters	1/age^2	cub	2.85154	-0.15554	0.07672	-0.00112		2.84	48.79	0.04815	33	0.936	2.5	62	29
NoCalC	Ulmus parvifolia	ULPA	dbh	leaf area	sq. meters	1	loglogw1	-0.56366	4.70824	0.63258			6.21	502.73	0.79535	28	0.808	0.3	751.6	26
NoCalC	Ulmus parvifolia	ULPA	dbh	tree ht	meters	1/dbh^2	quad	2.51638	0.40448	-0.0036			3.64	13.69	0.00561	32	0.884	3.2	19.6	29
NoEast	Acer platanoides	ACPL	dbh	age	years	1/sqrt(dbh)	cub	2.75443	0.28615	0.01875	-0.00013		0	119	6.8775	48	0.908	2	85	44
NoEast	Acer platanoides	ACPL	cdia	dbh	meters	1	loglogw1	1.17148	2.99617	0.06062			5.62	114.66	0.24621	42	0.914	2.7	120.7	40
NoEast	Acer platanoides	ACPL	dbh	crown dia	meters	1/dbh^2	quad	1.05784	0.25365	-0.00083			2.46	19.19	0.0019	42	0.921	2	22.1	39
NoEast	Acer platanoides	ACPL	dbh	crown ht	meters	1/dbh^2	quad	2.1127	0.09666	0.00067			2.68	21.99	0.00239	42	0.821	2.5	21	39
NoEast	Acer platanoides	ACPL	age	dbh	centimeters	1	lin	5.61705	0.91636				5.62	114.66	36.4112	48	0.91	2.7	120.7	46
NoEast	Acer platanoides	ACPL	dbh	leaf area	sq. meters	1/sqrt(dbh)	loglogw2	-0.55184	4.27852	0.07518			9.58	677.12	0.27419	31	0.824	3.1	814.1	29
NoEast	Acer platanoides	ACPL	dbh	tree ht	meters	1/dbh^2	lin	3.16827	0.19507				4.26	25.54	0.00289	42	0.882	3.9	25	40
NoEast	Acer rubrum	ACRU	dbh	age	years	1/dbh^2	cub	0.93244	0.02113	0.05658	-0.00055		0	119	0.07354	62	0.924	2	103	58
NoEast	Acer rubrum	ACRU	cdia	dbh	meters	1	loglogw1	1.48747	2.67841	0.08663			3.89	105.2	0.29433	46	0.865	3.2	124.5	44
NoEast	Acer rubrum	ACRU	dbh	crown dia	meters	1/dbh	quad	0.20703	0.32103	-0.00152			1.04	17.15	0.06742	46	0.932	1.3	21.9	43
NoEast	Acer rubrum	ACRU	dbh	crown ht	meters	1/dbh	lin	2.20449	0.15467				2.61	18.48	0.12037	46	0.846	2.5	26	44
NoEast	Acer rubrum	ACRU	age	dbh	centimeters	1/age	cub	2.64166	1.27076	-0.01758	0.00012		2.64	105.2	0.66271	62	0.946	3.2	124.5	58
NoEast	Acer rubrum	ACRU	dbh	leaf area	sq. meters	1	loglogw1	-1.35066	5.19281	0.18655			1.41	853.95	0.43192	34	0.911	2.9	1023.8	32
NoEast	Acer rubrum	ACRU	dbh	tree ht	meters	1/dbh^2	quad	3.21698	0.24941	-0.00065			3.87	22.24	0.00346	46	0.884	4	31	43
NoEast	Acer saccharinum	ACSA1	dbh	age	years	1/dbh^2	cub	1.655	0.22698	0.05987	-0.0008		1	150	0.25103	55	0.799	2	99	51
NoEast	Acer saccharinum	ACSA1	cdia	dbh	meters	1/cdia^2	cub	2.71478	-0.12565	0.56738	-0.01531		1.89	63.58	1.121	54	0.923	0.9	123.2	50
NoEast	Acer saccharinum	ACSA1	dbh	crown dia	meters	1/dbh	cub	0.73372	0.3504	-0.00296	1e-05		1.51	13.41	0.07348	54	0.935	1.7	21.7	50
NoEast	Acer saccharinum	ACSA1	dbh	crown ht	meters	1	loglogw1	0.15143	1.68838	0.0443			1.58	12.64	0.21048	54	0.828	2	22	52
NoEast	Acer saccharinum	ACSA1	age	dbh	centimeters	1	loglogw1	1.1583	1.77675	0.25666			2.25	58.49	0.50662	55	0.634	0.9	123.2	53
NoEast	Acer saccharinum	ACSA1	dbh	leaf area	sq. meters	1	loglogw1	-0.53332	4.75329	0.2281			1.98	538.02	0.4776	36	0.907	3	1427.2	34
NoEast	Acer saccharinum	ACSA1	dbh	tree ht	meters	1/sqrt(dbh)	loglogw2	0.42084	1.68914	0.00482			2.01	16.72	0.06943	54	0.935	2.5	27.5	52
NoEast	Acer saccharum	ACSA2	dbh	age	years	1	loglogw1	-0.54715	3.22652	0.0706			0	121	0.2657	16	0.91	2	95	14
NoEast	Acer saccharum	ACSA2	cdia	dbh	meters	1/cdia	quad	0.71706	2.40298	0.18081			3.02	105.5	9.10548	31	0.919	2.9	105.7	28
NoEast	Acer saccharum	ACSA2	dbh	crown dia	meters	1/sqrt(dbh)	quad	0.79563	0.28114	-0.0013			1.4	15.95	0.30417	31	0.937	1.5	17.7	28
NoEast	Acer saccharum	ACSA2	dbh	crown ht	meters	1/dbh	lin	1.83951	0.19211				2.26	22.11	0.14262	31	0.877	2	22	29
NoEast	Acer saccharum	ACSA2	age	dbh	centimeters	1/age	lin	2.17085	0.85396				2.17	105.5	0.76475	16	0.908	2.9	105.7	14
NoEast	Acer saccharum	ACSA2	dbh	leaf area	sq. meters	1	loglogw1	-1.1744	5.16173	0.30588			1.23	1037.94	0.55307	25	0.904	1.3	1056	23
NoEast	Acer saccharum	ACSA2	dbh	tree ht	meters	1/dbh	lin	3.14132	0.23463				3.65	27.9	0.17939	31	0.894	3	28.5	29
NoEast	Aesculus hippocastanum	AEHI	dbh	age	years	1	quad	-1.3217	1.38284	-0.00555			0	80	16.3702	25	0.967	2	44	22
NoEast	Aesculus hippocastanum	AEHI	cdia	dbh	meters	1/cdia^2	cub	4.35979	-1.80599	1.22827	-0.05025		3.81	90.02	0.88533	33	0.955	2.4	90.2	29
NoEast	Aesculus hippocastanum	AEHI	dbh	crown dia	meters	1/sqrt(dbh)	cub	0.16411	0.36854	-0.00599	4e-05		1.33	16.29	0.23416	33	0.919	0.5	17.8	29
NoEast	Aesculus hippocastanum	AEHI	dbh	crown ht	meters	1/sqrt(dbh)	lin	1.1662	0.16711				1.73	16.21	0.52662	33	0.872	0.5	17	31
NoEast	Aesculus hippocastanum	AEHI	age	dbh	centimeters	1/sqrt(age)	quad	3.34694	0.45797	0.00782			3.35	90.02	2.88861	25	0.969	2.4	90.2	22
NoEast	Aesculus hippocastanum	AEHI	dbh	leaf area	sq. meters	1	loglogw1	-2.24482	5.56941	0.26069			1.45	546.94	0.51058	26	0.901	1.1	739.8	24
NoEast	Aesculus hippocastanum	AEHI	dbh	tree ht	meters	1/sqrt(dbh)	quad	1.36605	0.31715	-0.00145			2.41	18.15	0.57671	33	0.894	1.5	21	30
NoEast	Fraxinus pennsylvanica	FRPE	dbh	age	years	1/dbh^2	quad	0.15398	0.50207	0.01235			0	107	0.03573	41	0.934	2	85	38
NoEast	Fraxinus pennsylvanica	FRPE	cdia	dbh	meters	1/cdia^2	quad	2.09268	2.01095	0.13594			3.86	123.45	1.22058	52	0.896	2.7	122.7	49
NoEast	Fraxinus pennsylvanica	FRPE	dbh	crown dia	meters	1/dbh	cub	-0.55792	0.48266	-0.00527	2e-05		0.58	23.38	0.08497	44	0.923	0.7	24.7	40
NoEast	Fraxinus pennsylvanica	FRPE	dbh	crown ht	meters	1/dbh	quad	1.38179	0.24946	-0.00095			1.98	17.63	0.19123	44	0.775	0.8	26.5	41
NoEast	Fraxinus pennsylvanica	FRPE	age	dbh	centimeters	1/sqrt(age)	cub	2.41764	1.4626	-0.02052	0.00016		2.42	123.45	3.05806	41	0.947	2.7	122.7	37
NoEast	Fraxinus pennsylvanica	FRPE	dbh	leaf area	sq. meters	1/sqrt(dbh)	loglogw2	-1.51177	5.39015	0.06139			0.7	1234.45	0.24777	35	0.898	2.3	1217.3	33
NoEast	Fraxinus pennsylvanica	FRPE	dbh	tree ht	meters	1	loglogw1	-0.00104	2.0008	0.04176			1.56	23.48	0.20436	44	0.866	2.2	34	42
NoEast	Ginkgo biloba	GIBI	dbh	age	years	1/dbh^2	quad	2.00627	0.94391	8e-05			0	104	0.53569	82	0.844	2	85	79
NoEast	Ginkgo biloba	GIBI	cdia	dbh	meters	1	loglogw1	1.79975	2.39243	0.10243			3.01	82.59	0.32004	32	0.871	1.1	106.2	30
NoEast	Ginkgo biloba	GIBI	dbh	crown dia	meters	1/dbh	quad	0.56506	0.23562	-0.00074			1.01	15	0.07995	32	0.906	1.2	17.8	29
NoEast	Ginkgo biloba	GIBI	dbh	crown ht	meters	1/dbh	quad	0.04776	0.3524	-0.00197			0.72	15.72	0.05556	33	0.95	1	19	30
NoEast	Ginkgo biloba	GIBI	age	dbh	centimeters	1/age	quad	1.91918	1.0947	-0.00307			1.92	82.59	3.16976	82	0.85	1.1	106.2	79
NoEast	Ginkgo biloba	GIBI	dbh	leaf area	sq. meters	1	loglogw1	-2.26741	5.50962	0.50117			0.48	508.49	0.70794	22	0.837	1.6	787.8	20
NoEast	Ginkgo biloba	GIBI	dbh	tree ht	meters	1/dbh^2	quad	1.50395	0.44055	-0.00251			2.34	20.74	0.0023	33	0.96	3	23	30
NoEast	Gleditsia triacanthos	GLTR	dbh	age	years	1/dbh^2	lin	-2.08484	0.69231				1	150	0.02804	24	0.867	2	85	22
NoEast	Gleditsia triacanthos	GLTR	cdia	dbh	meters	1/cdia^2	quad	0.72824	1.60241	0.11904			3.1	73.54	0.46563	34	0.938	5	94	31
NoEast	Gleditsia triacanthos	GLTR	dbh	crown dia	meters	1	loglogw1	-0.48922	2.32541	0.01534			1.46	18.19	0.12384	33	0.969	1.1	19.3	31
NoEast	Gleditsia triacanthos	GLTR	dbh	crown ht	meters	1	quad	2.40141	0.26137	-0.00119			3.23	15.04	5.56132	34	0.718	0.7	18	31
NoEast	Gleditsia triacanthos	GLTR	age	dbh	centimeters	1	loglogw1	1.68387	1.59967	0.06782			3.23	71.86	0.26043	24	0.848	5	94	22
NoEast	Gleditsia triacanthos	GLTR	dbh	leaf area	sq. meters	1	loglogw1	-0.69993	4.96614	0.16329			4.04	753.08	0.4041	24	0.941	1.2	1038	22
NoEast	Gleditsia triacanthos	GLTR	dbh	tree ht	meters	1	quad	2.72568	0.40207	-0.00231			4	19.7	5.9453	34	0.805	2	22.5	31
NoEast	Liquidambar styraciflua	LIST	dbh	age	years	1/dbh	lin	-2.20877	1.32556				0	150	5.48442	94	0.847	2	135	92
NoEast	Liquidambar styraciflua	LIST	cdia	dbh	meters	1/cdia^2	lin	-1.73388	4.54454				3.42	80.14	0.80537	41	0.939	2.2	111.8	39
NoEast	Liquidambar styraciflua	LIST	dbh	crown dia	meters	1/dbh^2	quad	0.20226	0.2869	-0.0009			1.17	17.39	0.00141	41	0.961	1	23.8	38
NoEast	Liquidambar styraciflua	LIST	dbh	crown ht	meters	1/dbh^2	quad	0.78667	0.28607	-0.0012			1.75	16.03	0.00304	41	0.905	1.5	23	38
NoEast	Liquidambar styraciflua	LIST	age	dbh	centimeters	1/age	quad	3.42364	0.88982	-0.00252			3.42	80.14	2.33638	94	0.855	2.2	111.8	91
NoEast	Liquidambar styraciflua	LIST	dbh	leaf area	sq. meters	1/dbh^2	quad	-4.47012	1.90089	0.10895			3.31	847.69	6.48252	23	0.871	1.3	1507.1	20
NoEast	Liquidambar styraciflua	LIST	dbh	tree ht	meters	1/dbh^2	cub	1.22713	0.4387	-0.00425	2e-05		2.68	20.52	0.0039	41	0.924	2.2	27	37
NoEast	Malus spp.	MA2	dbh	age	years	1/dbh	lin	-0.77187	1.14474				0	58	1.64013	24	0.857	2	49	22
NoEast	Malus spp.	MA2	cdia	dbh	meters	1	expow1	1.5206	0.23165	0.17096			2.85	46.08	0.41348	31	0.703	2	45.7	29
NoEast	Malus spp.	MA2	dbh	crown dia	meters	1/dbh	quad	0.44624	0.33986	-0.00342			1.39	8.84	0.0962	31	0.792	1.1	11.7	28
NoEast	Malus spp.	MA2	dbh	crown ht	meters	1	expow1	0.4298	0.03133	0.14681			1.81	7.01	0.38316	32	0.53	1	12.5	30
NoEast	Malus spp.	MA2	age	dbh	centimeters	1/sqrt(age)	lin	2.84705	0.74535				2.85	46.08	3.92494	24	0.871	2	45.7	22
NoEast	Malus spp.	MA2	dbh	leaf area	sq. meters	1/dbh^2	quad	-1.11868	0.92818	0.07216			2.11	194.86	1.11621	27	0.788	0.9	273.4	24
NoEast	Malus spp.	MA2	dbh	tree ht	meters	1	expow1	1.0323	0.02559	0.0767			3.14	9.48	0.27694	31	0.576	2	15	29
NoEast	Pinus strobus	PIST	dbh	age	years	1/dbh^2	quad	0.51428	0.55776	0.0201			1	131	0.04859	43	0.978	2	82	40
NoEast	Pinus strobus	PIST	cdia	dbh	meters	1/cdia	lin	-1.44108	4.69962				2.98	96.1	10.5671	32	0.88	2.2	95.4	30
NoEast	Pinus strobus	PIST	dbh	crown dia	meters	1/dbh	quad	0.26428	0.28611	-0.00132			1.11	15.57	0.07608	32	0.908	1.6	16.8	29
NoEast	Pinus strobus	PIST	dbh	crown ht	meters	1	loglogw1	-0.2013	1.97762	0.10026			1.66	16.91	0.31663	32	0.744	2	24	30
NoEast	Pinus strobus	PIST	age	dbh	centimeters	1	cub	1.87523	1.11975	-0.01146	6e-05		2.98	96.1	5.62031	43	0.972	2.2	95.4	39
NoEast	Pinus strobus	PIST	dbh	leaf area	sq. meters	1/sqrt(dbh)	loglogw2	-0.09073	4.05934	0.02352			3.47	491.72	0.15337	24	0.944	4.4	489.4	22
NoEast	Pinus strobus	PIST	dbh	tree ht	meters	1	loglogw1	-0.28182	2.25935	0.04993			1.63	23.72	0.22345	32	0.884	2.5	27	30
NoEast	Platanus x acerifolia	PLAC	dbh	age	years	1/dbh^2	cub	0.58171	0.30204	0.03224	-0.00037		0	92	0.05463	49	0.901	2	104	45
NoEast	Platanus x acerifolia	PLAC	cdia	dbh	meters	1/cdia^2	cub	2.40743	0.5252	0.40923	-0.00923		3.69	61.76	0.72952	53	0.936	2.8	164.6	49
NoEast	Platanus x acerifolia	PLAC	dbh	crown dia	meters	1	loglogw1	-0.75195	2.41418	0.01977			0.78	14.63	0.14059	53	0.942	2.4	25.6	51
NoEast	Platanus x acerifolia	PLAC	dbh	crown ht	meters	1/dbh	quad	1.79463	0.22161	-0.00068			2.32	12.88	0.15151	53	0.82	2.5	29.5	50
NoEast	Platanus x acerifolia	PLAC	age	dbh	centimeters	1/age	quad	2.40322	1.2942	-0.00705			2.4	61.76	1.9293	49	0.889	2.8	164.6	46
NoEast	Platanus x acerifolia	PLAC	dbh	leaf area	sq. meters	1	loglogw1	-2.06877	5.77886	0.27978			0.76	562.5	0.52895	35	0.89	8.3	1760.5	33
NoEast	Platanus x acerifolia	PLAC	dbh	tree ht	meters	1/dbh	quad	3.29515	0.30021	-0.00109			4.01	17.69	0.12837	53	0.892	5.5	33	50
NoEast	Prunus serrulata	PRSE2	dbh	age	years	1/dbh	lin	-1.6058	0.62144				0	58	0.1573	18	0.96	2	28	16
NoEast	Prunus serrulata	PRSE2	cdia	dbh	meters	1/cdia^2	lin	-6.15295	5.34284				5.14	92.51	1.31583	34	0.783	5.4	92.4	32
NoEast	Prunus serrulata	PRSE2	dbh	crown dia	meters	1	cub	1.57321	0.29639	-0.00543	4e-05		2.57	17.14	1.13385	34	0.803	2	17	30
NoEast	Prunus serrulata	PRSE2	dbh	crown ht	meters	1	loglogw1	-1.06476	2.08051	0.11			0.9	8.22	0.33166	34	0.575	1	12	32
NoEast	Prunus serrulata	PRSE2	age	dbh	centimeters	1/sqrt(age)	lin	3.606	1.53283				3.61	92.51	2.46664	18	0.962	5.4	92.4	16
NoEast	Prunus serrulata	PRSE2	dbh	leaf area	sq. meters	1/dbh^2	cub	-18.045	4.6553	-0.12798	0.00198		2.77	886.46	1.03283	31	0.806	3.1	880.9	27
NoEast	Prunus serrulata	PRSE2	dbh	tree ht	meters	1/sqrt(dbh)	loglogw2	0.20839	1.34422	0.00885			2.19	9.82	0.09405	34	0.659	3	15	32
NoEast	Pyrus calleryana	PYCA	dbh	age	years	1	lin	-1.06138	0.61303				0	40	3.08666	15	0.898	1	18	13
NoEast	Pyrus calleryana	PYCA	cdia	dbh	meters	1/sqrt(cdia)	lin	-0.3826	3.36484				5.4	54.93	3.31629	33	0.959	5.3	50.5	31
NoEast	Pyrus calleryana	PYCA	dbh	crown dia	meters	1/sqrt(dbh)	lin	0.41182	0.28531				1.59	16.08	0.15067	33	0.96	1	15.1	31
NoEast	Pyrus calleryana	PYCA	dbh	crown ht	meters	1	loglogw1	-0.51013	2.04284	0.05353			1.7	10.46	0.23137	32	0.826	1.4	11.5	30
NoEast	Pyrus calleryana	PYCA	age	dbh	centimeters	1/age^2	lin	4.13514	1.2698				4.14	54.93	0.14818	15	0.838	5.3	50.5	13
NoEast	Pyrus calleryana	PYCA	dbh	leaf area	sq. meters	1	loglogw1	-1.86944	5.60849	0.20744			3.44	437.87	0.45545	27	0.904	2.8	401.6	25
NoEast	Pyrus calleryana	PYCA	dbh	tree ht	meters	1	loglogw1	0.39228	1.55901	0.02317			3.22	13.03	0.15221	33	0.865	3.2	14.5	31
NoEast	Quercus palustris	QUPA	dbh	age	years	1/dbh	lin	1.76652	0.68508				0	96	3.31406	64	0.813	2	95	62
NoEast	Quercus palustris	QUPA	cdia	dbh	meters	1/cdia	cub	3.79953	-0.56987	0.51461	-0.01288		2.86	127.63	4.66938	54	0.96	1.5	127.8	50
NoEast	Quercus palustris	QUPA	dbh	crown dia	meters	1/dbh	cub	0.58861	0.37575	-0.00351	2e-05		1.63	28.44	0.05373	54	0.96	1.8	29.3	50
NoEast	Quercus palustris	QUPA	dbh	crown ht	meters	1/sqrt(dbh)	lin	1.99423	0.17497				2.49	24.33	0.71153	54	0.893	2	25	52
NoEast	Quercus palustris	QUPA	age	dbh	centimeters	1/age	lin	2.85629	1.29969				2.86	127.63	6.77089	64	0.85	1.5	127.8	62
NoEast	Quercus palustris	QUPA	dbh	leaf area	sq. meters	1/dbh^2	quad	-18.4608	5.04039	0.05296			3.4	1487.42	7.98933	37	0.871	0.1	1787.5	34
NoEast	Quercus palustris	QUPA	dbh	tree ht	meters	1/dbh	lin	2.97948	0.24435				3.68	34.17	0.14443	54	0.932	3	34	52
NoEast	Quercus phellos	QUPH	dbh	age	years	1/sqrt(dbh)	cub	-0.46592	0.39042	0.01441	-0.0001		0	102	0.76173	34	0.991	2	80	30
NoEast	Quercus phellos	QUPH	cdia	dbh	meters	1/cdia^2	quad	-0.68446	3.06303	0.0783			5.31	121.05	0.55736	33	0.931	4.8	113	30
NoEast	Quercus phellos	QUPH	dbh	crown dia	meters	1/dbh	quad	0.87983	0.27243	-0.00077			2	22.61	0.06102	33	0.942	1.8	23.7	30
NoEast	Quercus phellos	QUPH	dbh	crown ht	meters	1	loglogw1	-0.39341	2.08108	0.03402			1.93	17.82	0.18445	32	0.908	2	20	30
NoEast	Quercus phellos	QUPH	age	dbh	centimeters	1/age	lin	4.16427	1.14593				4.16	121.05	0.68411	34	0.972	4.8	113	32
NoEast	Quercus phellos	QUPH	dbh	leaf area	sq. meters	1	loglogw1	-1.36078	5.25688	0.16177			4.47	1072.62	0.40221	23	0.936	5	1359.8	21
NoEast	Quercus phellos	QUPH	dbh	tree ht	meters	1	loglogw1	0.20016	1.85242	0.01859			3.09	22.45	0.13634	33	0.935	4	24	31
NoEast	Quercus rubra	QURU	dbh	age	years	1/dbh	lin	0.01607	1.01679				0	150	2.29035	76	0.918	2	95	74
NoEast	Quercus rubra	QURU	cdia	dbh	meters	1/cdia^2	cub	0.78521	0.91658	0.35987	-0.00806		2.9	139.63	0.6026	51	0.954	2.1	171.7	47
NoEast	Quercus rubra	QURU	dbh	crown dia	meters	1/dbh	quad	1.13733	0.27575	-0.00076			1.93	24.89	0.06775	51	0.958	1.4	31.3	48
NoEast	Quercus rubra	QURU	dbh	crown ht	meters	1/dbh	quad	1.45116	0.25138	-0.00092			2.17	18.57	0.17356	51	0.847	1.5	27.5	48
NoEast	Quercus rubra	QURU	age	dbh	centimeters	1/sqrt(age)	lin	2.89687	0.91156				2.9	139.63	13.6847	76	0.908	2.1	171.7	74
NoEast	Quercus rubra	QURU	dbh	leaf area	sq. meters	1/dbh^2	cub	-3.02473	1.36611	0.20228	-0.00112		2.6	1150.14	7.38729	28	0.884	0.8	1498.4	24
NoEast	Quercus rubra	QURU	dbh	tree ht	meters	1/dbh	quad	2.98261	0.30808	-0.00105			3.87	25.59	0.14092	51	0.918	3.5	31.5	48
NoEast	Tilia cordata	TICO	dbh	age	years	1/dbh^2	cub	-0.31291	0.44918	0.0172	-0.00011		0	143	0.05054	113	0.926	2	95	109
NoEast	Tilia cordata	TICO	cdia	dbh	meters	1/cdia^2	cub	5.41842	-0.83626	0.72205	-0.02197		2.71	131.1	1.36303	48	0.918	3.2	130	44
NoEast	Tilia cordata	TICO	dbh	crown dia	meters	1/dbh^2	cub	-1.14976	0.44387	-0.00442	2e-05		0.61	18.82	0.00112	48	0.961	0.9	20.2	44
NoEast	Tilia cordata	TICO	dbh	crown ht	meters	1/dbh	quad	1.94287	0.21056	-0.00074			2.51	16.88	0.12142	48	0.811	2	20	45
NoEast	Tilia cordata	TICO	age	dbh	centimeters	1/age	cub	2.70741	1.43292	-0.01191	6e-05		2.71	131.1	1.5684	113	0.94	3.2	130	109
NoEast	Tilia cordata	TICO	dbh	leaf area	sq. meters	1	loglogw1	-2.54333	5.93939	0.31081			0.76	1166.66	0.55751	37	0.877	1	2182.6	35
NoEast	Tilia cordata	TICO	dbh	tree ht	meters	1/dbh	quad	2.91533	0.27146	-0.00098			3.64	21.74	0.1192	48	0.877	4	24.5	45
NoEast	Tilia tomentosa	TITO	dbh	age	years	1	expow1	1.29182	0.06238	0.46843			1	150	0.68442	26	0.522	2	72	24
NoEast	Tilia tomentosa	TITO	cdia	dbh	meters	1	loglogw1	1.77396	2.10147	0.06553			2.62	50.34	0.256	30	0.886	1.8	83.8	28
NoEast	Tilia tomentosa	TITO	dbh	crown dia	meters	1/sqrt(dbh)	loglogw2	-1.14455	2.59113	0.00931			0.75	10.7	0.09648	30	0.928	1.1	18.1	28
NoEast	Tilia tomentosa	TITO	dbh	crown ht	meters	1/dbh	quad	0.08359	0.36145	-0.00298			1.15	10.34	0.05995	30	0.882	1	14	27
NoEast	Tilia tomentosa	TITO	age	dbh	centimeters	1	loglogw1	1.36034	1.49373	0.29856			3.02	45.3	0.5464	26	0.53	1.8	83.8	24
NoEast	Tilia tomentosa	TITO	dbh	leaf area	sq. meters	1	loglogw1	-2.06999	5.76406	0.26615			1.43	355.94	0.51589	28	0.887	1.4	690.6	26
NoEast	Tilia tomentosa	TITO	dbh	tree ht	meters	1	loglogw1	0.2228	1.69429	0.01134			2.2	12.22	0.1065	30	0.942	3	17	28
NoEast	Ulmus americana	ULAM	dbh	age	years	1/dbh	lin	-1.24865	0.70723				0	97	1.3755	44	0.916	2	104	42
NoEast	Ulmus americana	ULAM	cdia	dbh	meters	1/cdia	lin	-3.75496	4.5953				6.61	132.97	15.0479	40	0.874	5.5	155.7	38
NoEast	Ulmus americana	ULAM	dbh	crown dia	meters	1/dbh	cub	2.38566	0.12102	0.0024	-2e-05		3.09	24.36	0.10918	40	0.927	2.1	26	36
NoEast	Ulmus americana	ULAM	dbh	crown ht	meters	1/sqrt(dbh)	loglogw2	0.31149	1.5835	0.00556			3.61	17.45	0.07459	40	0.915	2.2	25.5	38
NoEast	Ulmus americana	ULAM	age	dbh	centimeters	1/age	lin	5.28982	1.31631				5.29	132.97	4.93512	44	0.9	5.5	155.7	42
NoEast	Ulmus americana	ULAM	dbh	leaf area	sq. meters	1/sqrt(dbh)	loglogw2	-0.43434	4.68718	0.03337			11.7	1345.88	0.18267	30	0.949	3.4	2229.1	28
NoEast	Ulmus americana	ULAM	dbh	tree ht	meters	1/dbh^2	quad	2.72347	0.31773	-0.00119			4.37	23.9	0.00251	40	0.938	3.6	30	37
NoEast	Zelkova serrata	ZESE	dbh	age	years	1/dbh	cub	-1.109	1.1192	-0.0227	0.00025		0	60	1.06112	41	0.855	2	31	37
NoEast	Zelkova serrata	ZESE	cdia	dbh	meters	1/cdia^2	quad	-0.44053	2.18008	0.11187			3.5	81.63	0.1189	34	0.979	2.9	77.5	31
NoEast	Zelkova serrata	ZESE	dbh	crown dia	meters	1	loglogw1	-0.6785	2.39897	0.00585			0.72	17.91	0.07648	34	0.979	2.2	18.5	32
NoEast	Zelkova serrata	ZESE	dbh	crown ht	meters	1	loglogw1	-1.05694	2.5337	0.04988			0.53	15.17	0.22334	34	0.857	1.5	19	32
NoEast	Zelkova serrata	ZESE	age	dbh	centimeters	1/age	lin	2.17317	1.32424				2.17	81.63	3.55447	41	0.843	2.9	77.5	39
NoEast	Zelkova serrata	ZESE	dbh	leaf area	sq. meters	1	loglogw1	-1.52867	5.57994	0.11267			0.63	922.9	0.33566	30	0.932	3.8	1264.1	28
NoEast	Zelkova serrata	ZESE	dbh	tree ht	meters	1	loglogw1	0.01056	1.93455	0.0362			1.38	18.01	0.19026	34	0.827	3.5	23	32
PacfNW	Acer macrophyllum	ACMA	dbh	age	years	1/dbh	quad	0.57316	0.51132	0.00191			1	150	0.63305	40	0.976	1	150	37
PacfNW	Acer macrophyllum	ACMA	cdia	dbh	meters	1/cdia^2	cub	0.2992	1.76512	0.55846	-0.01836		1.75	174.33	1.86099	40	0.925	1.3	174	36
PacfNW	Acer macrophyllum	ACMA	dbh	crown dia	meters	1/dbh	quad	0.39369	0.24616	-0.00081			0.82	19.1	0.05823	40	0.963	0.4	21.6	37
PacfNW	Acer macrophyllum	ACMA	dbh	crown ht	meters	1	loglogw1	0.28858	1.74158	0.03472			1.4	23.44	0.18633	40	0.956	1	27	38
PacfNW	Acer macrophyllum	ACMA	age	dbh	centimeters	1/sqrt(age)	cub	-0.21317	1.97429	-0.01051	3e-05		1.75	174.33	9.62084	40	0.976	1.3	174	36
PacfNW	Acer macrophyllum	ACMA	dbh	leaf area	sq. meters	1	loglogw1	-1.54932	5.67086	0.32352			0.53	2764.92	0.56879	35	0.965	0	2256.2	33
PacfNW	Acer macrophyllum	ACMA	dbh	tree ht	meters	1	loglogw1	0.85132	1.48977	0.02171			2.42	27.14	0.14735	40	0.963	1.5	30.5	38
PacfNW	Acer platanoides	ACPL	dbh	age	years	1/dbh^2	cub	0.69436	0.34048	0.00733	-4e-05		1	94	0.01115	74	0.967	1	81	70
PacfNW	Acer platanoides	ACPL	cdia	dbh	meters	1/cdia^2	cub	0.75329	1.40261	0.35382	-0.00942		1.56	100	0.76623	74	0.955	1.1	129.4	70
PacfNW	Acer platanoides	ACPL	dbh	crown dia	meters	1/dbh	cub	0.0926	0.36724	-0.00266	1e-05		0.66	23.43	0.00357	74	0.969	0.3	23.5	70
PacfNW	Acer platanoides	ACPL	dbh	crown ht	meters	1/dbh	quad	1.83357	0.23724	-0.00089			2.2	17.59	0.07359	74	0.94	2	21	71
PacfNW	Acer platanoides	ACPL	age	dbh	centimeters	1/age	cub	-0.85211	2.4427	-0.02993	0.00022		1.56	146.78	1.40413	74	0.977	1.1	129.4	70
PacfNW	Acer platanoides	ACPL	dbh	leaf area	sq. meters	1	loglogw1	-0.65552	5.15935	0.25353			0.73	2251.37	0.50352	63	0.944	0.1	2387.2	61
PacfNW	Acer platanoides	ACPL	dbh	tree ht	meters	1/sqrt(dbh)	quad	2.56416	0.3118	-0.00127			3.05	21.68	0.50194	74	0.942	2	26	71
PacfNW	Acer rubrum	ACRU	dbh	age	years	1/dbh	quad	0.19481	0.65916	-0.00084			1	60	0.10634	39	0.987	1	53	36
PacfNW	Acer rubrum	ACRU	cdia	dbh	meters	1/cdia^2	cub	0.64872	1.37806	0.27303	-0.00666		2.94	96.47	0.38008	39	0.957	1.2	95	35
PacfNW	Acer rubrum	ACRU	dbh	crown dia	meters	1/dbh	cub	0.16933	0.43289	-0.00526	3e-05		0.73	21.87	0.00211	39	0.969	0.4	22.1	35
PacfNW	Acer rubrum	ACRU	dbh	crown ht	meters	1/dbh	cub	0.57374	0.52078	-0.00953	7e-05		1.25	21.88	0.05749	39	0.952	1	21	35
PacfNW	Acer rubrum	ACRU	age	dbh	centimeters	1/age	lin	-0.28784	1.61264				1.32	96.47	0.47538	39	0.986	1.2	95	37
PacfNW	Acer rubrum	ACRU	dbh	leaf area	sq. meters	1	loglogw1	-0.4824	4.97236	0.24582			0.52	1360.01	0.4958	38	0.951	0.1	1129.7	36
PacfNW	Acer rubrum	ACRU	dbh	tree ht	meters	1/dbh	cub	1.95274	0.61834	-0.01179	8e-05		2.75	27.55	0.06121	39	0.961	2.5	27	35
PacfNW	Acer saccharum	ACSA2	dbh	age	years	1/dbh	quad	0.35741	0.33851	0.00463			0	73	0.40512	37	0.983	1	74	34
PacfNW	Acer saccharum	ACSA2	cdia	dbh	meters	1/cdia^2	cub	0.33495	3.17841	0.28395	-0.0112		3.14	91.77	0.49783	37	0.971	1.3	97.9	33
PacfNW	Acer saccharum	ACSA2	dbh	crown dia	meters	1/dbh^2	quad	-0.04297	0.26749	-0.00063			0.35	19.18	0.00105	37	0.974	0.3	21.6	34
PacfNW	Acer saccharum	ACSA2	dbh	crown ht	meters	1/dbh	quad	1.2475	0.32945	-0.00126			1.73	20.85	0.10449	37	0.957	1.5	25	34
PacfNW	Acer saccharum	ACSA2	age	dbh	centimeters	1/sqrt(age)	cub	1.47953	1.65885	0.00513	-0.00015		1.48	91.77	3.00231	37	0.99	1.3	97.9	33
PacfNW	Acer saccharum	ACSA2	dbh	leaf area	sq. meters	1/dbh	loglogw3	-1.68905	5.95471	0.00136			1.5	1586.68	0.03688	32	0.998	0.1	2159.1	30
PacfNW	Acer saccharum	ACSA2	dbh	tree ht	meters	1/dbh	cub	1.10482	0.62678	-0.0077	4e-05		2.02	25.88	0.54725	37	0.968	1.5	30.5	33
PacfNW	Betula pendula	BEPE	dbh	age	years	1/dbh^2	quad	0.39331	0.52785	0.00437			1	47	0.01709	41	0.955	1	46	38
PacfNW	Betula pendula	BEPE	cdia	dbh	meters	1/cdia^2	cub	0.82226	0.2215	0.8505	-0.04466		3.23	48.32	0.32985	41	0.971	1.2	58.5	37
PacfNW	Betula pendula	BEPE	dbh	crown dia	meters	1/dbh	cub	0.35044	0.37618	-0.00631	7e-05		0.79	11.19	0.00164	41	0.96	0.6	13.9	37
PacfNW	Betula pendula	BEPE	dbh	crown ht	meters	1/dbh	quad	1.14308	0.53014	-0.00455			1.76	16.14	0.12264	41	0.947	1.5	20	38
PacfNW	Betula pendula	BEPE	age	dbh	centimeters	1/age	quad	-0.91466	2.11608	-0.02273			1.18	48.32	0.8507	41	0.969	1.2	58.5	38
PacfNW	Betula pendula	BEPE	dbh	leaf area	sq. meters	1/dbh^2	quad	-0.05315	0.15892	0.2975			0.55	702.25	7.51625	41	0.934	0.1	1198.1	38
PacfNW	Betula pendula	BEPE	dbh	tree ht	meters	1/dbh	quad	1.42669	0.70065	-0.00668			2.24	19.68	0.14186	41	0.96	2	23	38
PacfNW	Carpinus betulus 'Fastigiata'	CABEF	dbh	age	years	1	cub	-0.97624	1.02991	-0.01942	0.00016		2	34	1.41721	39	0.963	1	23	35
PacfNW	Carpinus betulus 'Fastigiata'	CABEF	cdia	dbh	meters	1	loglogw1	2.31114	1.4967	0.03034			3	38	0.00092	39	0.972	0.8	51.6	37
PacfNW	Carpinus betulus 'Fastigiata'	CABEF	dbh	crown dia	meters	1/dbh^2	cub	0.124	0.11118	0.00861	-0.00015		0.53	9.26	0	39	0.972	0.2	10.2	35
PacfNW	Carpinus betulus 'Fastigiata'	CABEF	dbh	crown ht	meters	1	loglogw1	0.21394	1.66187	0.02607			2.17	12.31	0.16147	39	0.957	0.5	13	37
PacfNW	Carpinus betulus 'Fastigiata'	CABEF	age	dbh	centimeters	1/age	cub	-0.99936	2.16074	-0.08853	0.00412		3	51.96	0.73563	39	0.97	0.8	51.6	35
PacfNW	Carpinus betulus 'Fastigiata'	CABEF	dbh	leaf area	sq. meters	1	loglogw1	-3.09187	6.99008	0.17664			0.69	811.38	0.42029	37	0.96	0.1	562.5	35
PacfNW	Carpinus betulus 'Fastigiata'	CABEF	dbh	tree ht	meters	1	loglogw1	0.68427	1.47106	0.01592			3.23	15.11	0.12619	39	0.966	1	15	37
PacfNW	Calocedrus decurrens	CADE2	dbh	age	years	1	cub	-3.92586	1.19536	-0.01523	7e-05		2	23	5.92081	38	0.935	2	31	34
PacfNW	Calocedrus decurrens	CADE2	cdia	dbh	meters	1/cdia^2	cub	-0.3338	-4.50349	14.5381	-2.22352		1.69	70	16.8955	38	0.896	2.9	89.6	34
PacfNW	Calocedrus decurrens	CADE2	dbh	crown dia	meters	1	loglogw1	-0.81693	1.39977	0.05206			0.87	3.05	0.22817	38	0.799	0.7	5.3	36
PacfNW	Calocedrus decurrens	CADE2	dbh	crown ht	meters	1/dbh	cub	1.04793	0.20865	0.00281	-4e-05		1.91	13.62	0.06425	38	0.947	1.5	17.5	34
PacfNW	Calocedrus decurrens	CADE2	age	dbh	centimeters	1/age^2	lin	-0.5418	2.23052				3.92	50.76	0.23807	38	0.929	2.9	89.6	36
PacfNW	Calocedrus decurrens	CADE2	dbh	leaf area	sq. meters	1	loglogw1	-3.08102	5.42583	0.12706			0.71	86.02	0.35645	38	0.961	0.2	182.9	36
PacfNW	Calocedrus decurrens	CADE2	dbh	tree ht	meters	1	quad	-0.43078	0.46333	-0.00309			1.34	15.12	2.52066	38	0.918	1.5	19.5	35
PacfNW	Crataegus x lavallei	CRLA	dbh	age	years	1	loglogw1	0.66848	2.26341	0.21909			2	48	0.46807	74	0.919	1	47	72
PacfNW	Crataegus x lavallei	CRLA	cdia	dbh	meters	1/cdia^2	cub	1.02603	-0.06687	0.77348	-0.03728		1.9	38.23	0.42216	74	0.962	0.9	52	70
PacfNW	Crataegus x lavallei	CRLA	dbh	crown dia	meters	1/dbh	quad	0.17454	0.40208	-0.00444			0.92	9.06	0.02333	74	0.974	0.4	10.7	71
PacfNW	Crataegus x lavallei	CRLA	dbh	crown ht	meters	1/sqrt(dbh)	quad	0.93095	0.25848	-0.0016			1.42	8.47	0.28217	74	0.845	1	11	71
PacfNW	Crataegus x lavallei	CRLA	age	dbh	centimeters	1/age^2	cub	0.20544	0.81745	0.01594	-0.00034		1.9	38.23	0.04075	74	0.947	0.9	52	70
PacfNW	Crataegus x lavallei	CRLA	dbh	leaf area	sq. meters	1/dbh^2	cub	1.26793	-1.41462	0.39699	-0.00419		0.32	293.54	3.24851	74	0.918	0	470.6	70
PacfNW	Crataegus x lavallei	CRLA	dbh	tree ht	meters	1/sqrt(dbh)	quad	1.88852	0.33423	-0.00252			2.51	10.99	0.25145	74	0.898	2	13	71
PacfNW	Fagus sylvatica	FASY	dbh	age	years	1/dbh	cub	1.00624	0.24853	0.0104	-0.0001		2	42	0.14285	38	0.982	1	38	34
PacfNW	Fagus sylvatica	FASY	cdia	dbh	meters	1/cdia^2	cub	0.8162	1.20719	0.26657	-0.00642		3.56	87.41	0.18994	38	0.981	1	88.3	34
PacfNW	Fagus sylvatica	FASY	dbh	crown dia	meters	1/sqrt(dbh)	cub	-0.02818	0.46803	-0.0055	3e-05		1.57	20.61	0.03187	38	0.98	0.2	21	34
PacfNW	Fagus sylvatica	FASY	dbh	crown ht	meters	1/dbh	cub	0.241	0.5817	-0.00797	5e-05		2.22	20.65	0.08994	38	0.957	0.5	20	34
PacfNW	Fagus sylvatica	FASY	age	dbh	centimeters	1/age	cub	-2.64454	3.28563	-0.09364	0.00158		3.56	87.41	1.11111	38	0.978	1	88.3	34
PacfNW	Fagus sylvatica	FASY	dbh	leaf area	sq. meters	1	loglogw1	-1.00002	5.53664	0.09336			4.39	1575.98	0.30556	34	0.97	2.6	1689.9	32
PacfNW	Fagus sylvatica	FASY	dbh	tree ht	meters	1/sqrt(dbh)	cub	0.25817	0.79152	-0.0123	7e-05		2.93	24.99	0.54725	38	0.962	0.5	24.5	34
PacfNW	Fraxinus latifolia	FRLA	dbh	age	years	1/dbh^2	quad	0.54234	0.5756	0.00247			2	85	0.02226	39	0.951	1	112	36
PacfNW	Fraxinus latifolia	FRLA	cdia	dbh	meters	1	loglogw1	1.76367	2.39953	0.06678			2.86	94.09	0.25841	39	0.955	1	141.2	37
PacfNW	Fraxinus latifolia	FRLA	dbh	crown dia	meters	1/dbh^2	cub	0.18904	0.37563	-0.00399	2e-05		1.23	17.31	0	39	0.955	0.5	27.3	35
PacfNW	Fraxinus latifolia	FRLA	dbh	crown ht	meters	1/dbh^2	quad	0.53509	0.37254	-0.00163			1.59	21.16	0.00495	39	0.924	1	28	36
PacfNW	Fraxinus latifolia	FRLA	age	dbh	centimeters	1/age	cub	-1.63283	2.29867	-0.02735	0.00016		2.86	94.09	1.19203	39	0.977	1	141.2	35
PacfNW	Fraxinus latifolia	FRLA	dbh	leaf area	sq. meters	1/sqrt(dbh)	loglogw2	-1.27832	5.54199	0.05757			1.54	1641.98	0.23994	34	0.986	0	2023.5	32
PacfNW	Fraxinus latifolia	FRLA	dbh	tree ht	meters	1/dbh	quad	1.40753	0.49125	-0.0026			2.79	24.58	0.20186	39	0.949	2	30	36
PacfNW	Liquidambar styraciflua	LIST	dbh	age	years	1/dbh	cub	0.75623	0.27517	0.01399	-0.00016		0	40	0.25393	73	0.965	1	34	69
PacfNW	Liquidambar styraciflua	LIST	cdia	dbh	meters	1/cdia^2	lin	-1.81154	4.27467				2.02	67.66	0.42044	73	0.967	1	74.4	71
PacfNW	Liquidambar styraciflua	LIST	dbh	crown dia	meters	1/dbh	quad	0.41201	0.27728	-0.00101			0.97	14.57	0.03568	73	0.97	0.6	17.5	70
PacfNW	Liquidambar styraciflua	LIST	dbh	crown ht	meters	1/dbh	quad	0.89761	0.40549	-0.00264			1.71	16.25	0.13144	73	0.93	1	22	70
PacfNW	Liquidambar styraciflua	LIST	age	dbh	centimeters	1/sqrt(age)	lin	2.02364	1.64102				2.02	67.66	6.55405	73	0.941	1	74.4	71
PacfNW	Liquidambar styraciflua	LIST	dbh	leaf area	sq. meters	1/dbh^2	cub	0.61572	-0.63818	0.47404	-0.00342		1.24	1069.61	9.75177	72	0.929	0.1	1414.7	68
PacfNW	Liquidambar styraciflua	LIST	dbh	tree ht	meters	1/dbh	quad	1.37134	0.5091	-0.00376			2.39	18.61	0.11423	73	0.955	1.5	24	70
PacfNW	Morus alba	MOAL	dbh	age	years	1/dbh^2	cub	-0.84292	1.65967	-0.0534	0.00062		2	42	0.00703	38	0.97	1	36	34
PacfNW	Morus alba	MOAL	cdia	dbh	meters	1/cdia^2	cub	0.69882	0.38155	0.30043	-0.00873		3.92	55	0.07086	38	0.989	1.1	61.5	34
PacfNW	Morus alba	MOAL	dbh	crown dia	meters	1/dbh	quad	0.403769	0.452308	-0.00249794			2.14	19.64	0.03846	39	0.992	0.8	20.1	36
PacfNW	Morus alba	MOAL	dbh	crown ht	meters	1/sqrt(dbh)	quad	0.69217	0.33321	-0.00245			1.96	12.04	0.22606	38	0.954	0.5	13	35
PacfNW	Morus alba	MOAL	age	dbh	centimeters	1/sqrt(age)	cub	-4.50256	4.49267	-0.14464	0.00188		3.92	68.25	3.67605	38	0.971	1.1	61.5	34
PacfNW	Morus alba	MOAL	dbh	leaf area	sq. meters	1	loglogw1	0.21087	4.87716	0.11207			14.17	1506.65	0.33477	39	0.98	0.4	2148.5	37
PacfNW	Morus alba	MOAL	dbh	tree ht	meters	1/dbh	quad	1.50551	0.42182	-0.00304			3.11	16.11	0.03077	38	0.986	2	17	35
PacfNW	Pinus contorta subsp. bolanderi	PICO5	dbh	age	years	1/dbh^2	cub	1.04669	-0.1142	0.03967	-0.00051		1	37	0.01332	39	0.955	1	31	35
PacfNW	Pinus contorta subsp. bolanderi	PICO5	cdia	dbh	meters	1	loglogw1	1.95606	2.16085	0.03133			2.61	42.99	0.177	38	0.912	2.4	56.5	36
PacfNW	Pinus contorta subsp. bolanderi	PICO5	dbh	crown dia	meters	1/dbh^2	quad	0.35277	0.23532	-0.00137			0.96	7.99	0.00103	38	0.957	0.9	8.8	35
PacfNW	Pinus contorta subsp. bolanderi	PICO5	dbh	crown ht	meters	1/dbh^2	lin	1.54381	0.16978				1.99	8.92	0.00184	38	0.913	2	10	36
PacfNW	Pinus contorta subsp. bolanderi	PICO5	age	dbh	centimeters	1/sqrt(age)	loglogw2	1.57707	1.6895	0.00427			2.61	43.46	0.06532	39	0.983	2.4	56.5	37
PacfNW	Pinus contorta subsp. bolanderi	PICO5	dbh	leaf area	sq. meters	1	loglogw1	-0.76822	4.59751	0.14668			1.89	232.94	0.38299	39	0.882	1.6	448.8	37
PacfNW	Pinus contorta subsp. bolanderi	PICO5	dbh	tree ht	meters	1/dbh	lin	1.55686	0.23113				2.16	11.6	0.10506	38	0.839	2	12.5	36
PacfNW	Populus balsamifera subsp. trichocarpa	POTR2	dbh	age	years	1/dbh	cub	1.49435	-0.11181	0.1546	-0.00359		2	71	0.6885	39	0.994	1	147	35
PacfNW	Populus balsamifera subsp. trichocarpa	POTR2	cdia	dbh	meters	1/cdia	lin	-0.50224	3.16188				1.94	134.01	1.8522	39	0.89	1	204.5	37
PacfNW	Populus balsamifera subsp. trichocarpa	POTR2	dbh	crown dia	meters	1	loglogw1	0.12163	1.62583	0.07523			1.35	15.17	0.27429	36	0.901	0.6	34.9	34
PacfNW	Populus balsamifera subsp. trichocarpa	POTR2	dbh	crown ht	meters	1/dbh	quad	1.31743	0.49369	-0.00184			2.27	34.37	0.25139	36	0.955	1.5	45.5	33
PacfNW	Populus balsamifera subsp. trichocarpa	POTR2	age	dbh	centimeters	1/age	cub	-0.52236	1.19511	0.01779	-0.00011		1.94	134.01	0.42886	36	0.995	1	204.5	32
PacfNW	Populus balsamifera subsp. trichocarpa	POTR2	dbh	leaf area	sq. meters	1	loglogw1	-0.36109	4.93446	0.49534			2.8	2274.1	0.7038	39	0.936	0	4054.7	37
PacfNW	Populus balsamifera subsp. trichocarpa	POTR2	dbh	tree ht	meters	1/dbh	quad	1.60968	0.53395	-0.00187			2.64	39.61	0.29552	36	0.958	2	49.5	33
PacfNW	Prunus cerasifera	PRCE	dbh	age	years	1/dbh^2	cub	0.90691	0.16681	0.02458	-0.00026		0	40	0.02531	74	0.938	1	45	70
PacfNW	Prunus cerasifera	PRCE	cdia	dbh	meters	1	loglogw1	1.61707	2.40368	0.04956			2.91	48.53	0.22263	73	0.933	1.3	59	71
PacfNW	Prunus cerasifera	PRCE	dbh	crown dia	meters	1/dbh^2	quad	0.17605	0.37473	-0.00359			0.79	6.47	0.00097	73	0.979	0.6	13.5	70
PacfNW	Prunus cerasifera	PRCE	dbh	crown ht	meters	1/dbh	quad	1.13295	0.25941	-0.00271			1.56	5.39	0.05368	73	0.873	1.5	10	70
PacfNW	Prunus cerasifera	PRCE	age	dbh	centimeters	1/sqrt(age)	quad	0.78364	0.88584	-0.00949			1.66	21.04	0.59084	39	0.936	1.3	59	36
PacfNW	Prunus cerasifera	PRCE	dbh	leaf area	sq. meters	1	loglogw1	-0.8793	4.90311	0.23211			0.65	126.11	0.48177	29	0.92	0.1	608.8	27
PacfNW	Prunus cerasifera	PRCE	dbh	tree ht	meters	1/dbh	quad	1.75135	0.35285	-0.00369			2.33	7.54	0.04045	73	0.944	2	13	70
PacfNW	Prunus serrulata	PRSE2	dbh	age	years	1/dbh	cub	0.55903	0.81962	-0.00508	2e-05		1	44	0.11159	36	0.976	1	34	32
PacfNW	Prunus serrulata	PRSE2	cdia	dbh	meters	1/cdia	quad	-2.77143	7.51392	-0.17692			2.97	70	182.647	38	0.911	1.3	79	35
PacfNW	Prunus serrulata	PRSE2	dbh	crown dia	meters	1/dbh	quad	0.40377	0.45231	-0.0025			0.93	15.62	0.02757	38	0.928	0.4	15.5	35
PacfNW	Prunus serrulata	PRSE2	dbh	crown ht	meters	1/dbh	lin	1.10845	0.09734				1.22	8.81	0.05963	38	0.834	1	9.5	36
PacfNW	Prunus serrulata	PRSE2	age	dbh	centimeters	1/age^2	lin	-0.65197	1.81238				1.16	79.09	0.13611	38	0.949	1.3	79	36
PacfNW	Prunus serrulata	PRSE2	dbh	leaf area	sq. meters	1	loglogw1	-1.93065	5.12856	0.74048			0.28	430.13	0.86051	74	0.88	0	806	72
PacfNW	Prunus serrulata	PRSE2	dbh	tree ht	meters	1/dbh^2	cub	1.54418	0.31365	-0.00561	4e-05		1.9	12.47	0.00166	38	0.909	2	14	34
PacfNW	Pseudotsuga menziesii	PSME	dbh	age	years	1/dbh	quad	0.8747	0.357	0.00306			1	93	0.31081	39	0.976	1	76	36
PacfNW	Pseudotsuga menziesii	PSME	cdia	dbh	meters	1/cdia^2	cub	1.53581	0.2103	0.70805	-0.02168		1.15	108.86	1.19413	39	0.934	1.7	118.2	35
PacfNW	Pseudotsuga menziesii	PSME	dbh	crown dia	meters	1/sqrt(dbh)	loglogw2	-0.82603	2.35246	0.00584			0.23	17.2	0.07642	39	0.986	0.4	24.7	37
PacfNW	Pseudotsuga menziesii	PSME	dbh	crown ht	meters	1/dbh	quad	0.2225	0.49037	-0.0024			0.78	25.31	0.15217	39	0.95	0.5	29.5	36
PacfNW	Pseudotsuga menziesii	PSME	age	dbh	centimeters	1/age	quad	-1.19688	2.36185	-0.01267			1.15	108.86	0.79971	39	0.985	1.7	118.2	36
PacfNW	Pseudotsuga menziesii	PSME	dbh	leaf area	sq. meters	1	loglogw1	-3.15072	6.98931	0.57231			0.06	2839.8	0.75651	37	0.944	0	2424.5	35
PacfNW	Pseudotsuga menziesii	PSME	dbh	tree ht	meters	1/dbh	quad	0.04179	0.5776	-0.00274			0.7	30.48	0.14419	39	0.966	0.5	36.6	36
PacfNW	Malus angustifolia	PYAN	dbh	age	years	1/dbh	cub	1.49435	-0.11181	0.154596	-0.00359138		0	47	0.688499	39	0.96	1	39	35
PacfNW	Malus angustifolia	PYAN	cdia	dbh	meters	1/cdia	lin	-0.145962	3.0832				1.66	21.46	8.26537	38	0.903	1.1	24.9	37
PacfNW	Malus angustifolia	PYAN	dbh	crown dia	meters	1/dbh	quad	0.0172973	0.489634	-0.00972079			0.4	6.05	0.0384593	38	0.939	0.6	7.1	36
PacfNW	Malus angustifolia	PYAN	dbh	crown ht	meters	1/dbh	cub	1.10172	-0.26591	0.05319	-0.00153		0.75	4.85	0.03953	39	0.886	0.5	6.5	35
PacfNW	Malus angustifolia	PYAN	age	dbh	centimeters	1/sqrt(age)	quad	0.78364	0.885845	-0.00948777			0.78	21.46	0.59084	39	0.96	1.1	24.9	36
PacfNW	Malus angustifolia	PYAN	dbh	leaf area	sq. meters	1	loglogw1	-1.65725	5.18953	0.71529			0.14	121.32	0.84575	39	0.835	0	127.9	37
PacfNW	Malus angustifolia	PYAN	dbh	tree ht	meters	1/dbh	cub	1.67077	0.07431	0.03374	-0.00119		1.75	7.16	0.0493	39	0.921	1.5	8.5	35
PacfNW	Quercus rubra	QURU	dbh	age	years	1/dbh^2	quad	0.64315	0.34124	0.00265			1	64	0.01316	39	0.944	1	74	36
PacfNW	Quercus rubra	QURU	cdia	dbh	meters	1/cdia^2	cub	0.69338	1.08675	0.26902	-0.0058		1.99	105.87	0.24158	39	0.98	1.2	113.7	35
PacfNW	Quercus rubra	QURU	dbh	crown dia	meters	1	loglogw1	-0.33383	2.2058	0.0115			0.88	21.52	0.10725	39	0.988	0.5	27.3	37
PacfNW	Quercus rubra	QURU	dbh	crown ht	meters	1/dbh	lin	1.80318	0.21653				2.23	24.73	0.13853	39	0.939	1.5	27	37
PacfNW	Quercus rubra	QURU	age	dbh	centimeters	1/age	cub	0.12978	1.83846	0.02001	-0.00036		1.99	105.87	1.58167	39	0.98	1.2	113.7	35
PacfNW	Quercus rubra	QURU	dbh	leaf area	sq. meters	1/dbh^2	cub	1.5132	-1.40346	0.45025	-0.00179		0.49	2773.62	7.59444	27	0.971	0.3	3283.2	23
PacfNW	Quercus rubra	QURU	dbh	tree ht	meters	1	cub	4.32011	0.02074	0.00596	-4e-05		4.38	28	5.38374	39	0.918	2	31.5	35
PacfNW	Tilia americana	TIAM	dbh	age	years	1/dbh^2	cub	0.25539	0.67674	-0.0057	9e-05		1	70	0.00974	39	0.974	1	74	35
PacfNW	Tilia americana	TIAM	cdia	dbh	meters	1/cdia^2	quad	0.14685	3.4123	0.09475			2.82	84.85	0.37772	39	0.965	1	94.7	36
PacfNW	Tilia americana	TIAM	dbh	crown dia	meters	1/dbh	quad	0.00315	0.30261	-0.00136			0.34	15.86	0.03093	39	0.982	0.4	17.6	36
PacfNW	Tilia americana	TIAM	dbh	crown ht	meters	1/dbh	lin	1.79973	0.20395				2.03	19.11	0.07049	39	0.96	2	23	37
PacfNW	Tilia americana	TIAM	age	dbh	centimeters	1/age	cub	-0.57558	1.6899	0.00442	-0.00016		1.12	84.85	0.59159	39	0.989	1	94.7	35
PacfNW	Tilia americana	TIAM	dbh	leaf area	sq. meters	1	loglogw1	-0.53808	5.14273	0.16444			0.23	1389.44	0.40552	34	0.973	0.3	1878.5	32
PacfNW	Tilia americana	TIAM	dbh	tree ht	meters	1/dbh	quad	2.16179	0.30424	-0.0008			2.5	22.2	0.09794	39	0.961	2	25.5	36
PacfNW	Tilia cordata	TICO	dbh	age	years	1/dbh	cub	0.77726	0.4449	0.00919	-6e-05		1	82	0.28074	40	0.979	1	74	36
PacfNW	Tilia cordata	TICO	cdia	dbh	meters	1/cdia^2	quad	0.91801	2.66134	0.13245			3.14	125.41	0.59893	40	0.943	1.2	124.6	37
PacfNW	Tilia cordata	TICO	dbh	crown dia	meters	1/dbh	quad	-0.01436	0.29841	-0.0012			0.35	18.54	0.03508	40	0.975	0.2	18.1	37
PacfNW	Tilia cordata	TICO	dbh	crown ht	meters	1/dbh	cub	0.85835	0.37393	-0.00368	2e-05		1.31	21.72	0.09527	40	0.93	1	21	36
PacfNW	Tilia cordata	TICO	age	dbh	centimeters	1/age	cub	-0.74132	1.99578	-0.02803	0.00027		1.23	125.41	0.94314	40	0.971	1.2	124.6	36
PacfNW	Tilia cordata	TICO	dbh	leaf area	sq. meters	1/dbh^2	cub	0.66057	-0.60429	0.39734	-0.00279		0.51	1134.5	9.07398	38	0.901	0	1193.3	34
PacfNW	Tilia cordata	TICO	dbh	tree ht	meters	1/sqrt(dbh)	quad	2.18773	0.32224	-0.0011			2.58	25.34	0.55458	40	0.93	1.5	26	37
PacfNW	Ulmus americana	ULAM	dbh	age	years	1/dbh	cub	0.90064	0.34281	0.00785	-4e-05		1	110	0.38305	41	0.983	1	74	37
PacfNW	Ulmus americana	ULAM	cdia	dbh	meters	1/cdia^2	cub	0.11354	1.14531	0.31746	-0.0076		2.91	138.55	0.66528	41	0.952	0.7	135.2	37
PacfNW	Ulmus americana	ULAM	dbh	crown dia	meters	1/dbh	cub	0.33815	0.43976	-0.00425	2e-05		0.82	32.31	0.01105	41	0.963	0.5	31.5	37
PacfNW	Ulmus americana	ULAM	dbh	crown ht	meters	1/dbh	cub	0.78744	0.55014	-0.00515	2e-05		1.39	27.32	0.1084	41	0.968	1	32	37
PacfNW	Ulmus americana	ULAM	age	dbh	centimeters	1/age	quad	-0.70738	1.81652	-0.00501			1.1	138.55	1.36511	41	0.982	0.7	135.2	38
PacfNW	Ulmus americana	ULAM	dbh	leaf area	sq. meters	1	loglogw1	-0.52583	5.28335	0.13193			0.19	2927.85	0.36322	32	0.985	0.1	4543	30
PacfNW	Ulmus americana	ULAM	dbh	tree ht	meters	1/sqrt(dbh)	cub	1.86129	0.61188	-0.00496	2e-05		2.53	32.67	0.71841	41	0.971	2	36.5	37
Piedmt	Acer rubrum	ACRU	dbh	age	years	1/sqrt(dbh)	quad	-1.67659	0.66594	-0.00162			0	57	0.56735	44	0.987	3	60	41
Piedmt	Acer rubrum	ACRU	cdia	dbh	meters	1/cdia^2	cub	5.03293	0.3587	0.40222	-0.00938		5.48	122.46	0.79049	44	0.923	6.4	132.8	40
Piedmt	Acer rubrum	ACRU	dbh	crown dia	meters	1	loglogw1	-1.22652	2.73952	0.02336			1.17	21.9	0.15285	44	0.949	2	30.1	42
Piedmt	Acer rubrum	ACRU	dbh	crown ht	meters	1/dbh	quad	0.46515	0.36234	-0.00147			1.96	22.81	0.11962	44	0.916	3	30	41
Piedmt	Acer rubrum	ACRU	age	dbh	centimeters	1/sqrt(age)	quad	4.18772	1.27754	0.01399			4.19	122.46	4.01129	44	0.984	6.4	132.8	41
Piedmt	Acer rubrum	ACRU	dbh	leaf area	sq. meters	1/sqrt(dbh)	loglogw2	-7.7164	10.0923	0.04044			0.26	3493.18	0.20109	41	0.971	0.4	2584.5	39
Piedmt	Acer rubrum	ACRU	dbh	tree ht	meters	1/dbh^2	cub	2.93522	0.24561	0.00217	-2e-05		4	26.29	0.00237	44	0.939	4.5	32	40
Piedmt	Acer saccharinum	ACSA1	dbh	age	years	1/sqrt(dbh)	quad	-0.22078	0.54916	-0.00103			0	60	2.24949	48	0.942	3	50	45
Piedmt	Acer saccharinum	ACSA1	cdia	dbh	meters	1	loglogw1	0.89489	3.26034	0.04473			1.3	127.83	0.2115	48	0.939	3	122.7	46
Piedmt	Acer saccharinum	ACSA1	dbh	crown dia	meters	1/dbh	quad	1.20094	0.268	-0.00085			1.55	21.52	0.06285	48	0.949	2.2	24.4	45
Piedmt	Acer saccharinum	ACSA1	dbh	crown ht	meters	1/dbh	quad	0.75811	0.29822	-0.00125			1.14	18.51	0.08356	48	0.93	1	22	45
Piedmt	Acer saccharinum	ACSA1	age	dbh	centimeters	1/sqrt(age)	lin	1.29639	2.10889				1.3	127.83	16.8849	48	0.937	3	122.7	46
Piedmt	Acer saccharinum	ACSA1	dbh	leaf area	sq. meters	1	loglogw1	-4.80966	7.76832	0.41332			0.48	2424.88	0.6429	45	0.914	0.3	3340.3	43
Piedmt	Acer saccharinum	ACSA1	dbh	tree ht	meters	1/dbh	quad	2.22765	0.31233	-0.0011			2.63	24.16	0.07796	48	0.949	3	27	45
Piedmt	Acer saccharum	ACSA2	dbh	age	years	1	loglogw1	-1.24539	3.32009	0.07602			1	56	0.27571	40	0.895	3	75	38
Piedmt	Acer saccharum	ACSA2	cdia	dbh	meters	1	loglogw1	0.84668	3.1315	0.04467			0.64	84.67	0.21136	40	0.931	5.6	87.9	38
Piedmt	Acer saccharum	ACSA2	dbh	crown dia	meters	1/dbh	quad	0.78702	0.34617	-0.00164			1.01	18.32	0.0487	40	0.952	2	20.7	37
Piedmt	Acer saccharum	ACSA2	dbh	crown ht	meters	1	loglogw1	-0.47439	2.29608	0.04443			1.35	19.4	0.21079	40	0.875	2.5	24	38
Piedmt	Acer saccharum	ACSA2	age	dbh	centimeters	1/age	cub	-1.68001	2.32536	-0.00094	-0.00023		0.64	84.67	0.99265	40	0.972	5.6	87.9	36
Piedmt	Acer saccharum	ACSA2	dbh	leaf area	sq. meters	1	loglogw1	-5.90451	8.77915	0.31248			1.17	1818.43	0.559	36	0.941	1	2804.4	34
Piedmt	Acer saccharum	ACSA2	dbh	tree ht	meters	1/dbh	quad	2.53765	0.40849	-0.00178			2.8	24.35	0.13665	40	0.915	4.5	28	37
Piedmt	Betula nigra	BENI	dbh	age	years	1	loglogw1	-0.26433	2.48218	0.03476			1	35	0.18644	39	0.886	2	35	37
Piedmt	Betula nigra	BENI	cdia	dbh	meters	1	loglogw1	0.57271	3.4644	0.06753			0.95	73.14	0.25987	39	0.846	3.6	72.1	37
Piedmt	Betula nigra	BENI	dbh	crown dia	meters	1/dbh^2	lin	2.45947	0.20529				2.65	17.47	0.00233	39	0.908	3.2	20.9	37
Piedmt	Betula nigra	BENI	dbh	crown ht	meters	1/dbh	quad	1.81237	0.34685	-0.00223			2.14	15.26	0.18182	39	0.767	3	19	36
Piedmt	Betula nigra	BENI	age	dbh	centimeters	1/age^2	lin	-1.17183	2.12321				0.95	73.14	0.27529	39	0.893	3.6	72.1	37
Piedmt	Betula nigra	BENI	dbh	leaf area	sq. meters	1	loglogw1	-4.04566	7.20117	0.51472			0.68	978.56	0.71744	34	0.825	0.8	1232.1	32
Piedmt	Betula nigra	BENI	dbh	tree ht	meters	1/dbh	quad	2.67649	0.39402	-0.00246			3.05	18.34	0.18084	39	0.816	4.5	23	36
Piedmt	Cornus florida	COFL	dbh	age	years	1/dbh	lin	2.44657	0.50578				2	30	0.26388	33	0.918	2	27	31
Piedmt	Cornus florida	COFL	cdia	dbh	meters	1/cdia	lin	-3.92145	4.00089				1.44	51.61	5.53859	33	0.821	1.3	49	31
Piedmt	Cornus florida	COFL	dbh	crown dia	meters	1/sqrt(dbh)	quad	1.23571	0.31119	-0.00233			1.68	11.1	0.33639	33	0.84	1.1	12.6	30
Piedmt	Cornus florida	COFL	dbh	crown ht	meters	1/dbh	lin	2.10385	0.11917				2.28	8.25	0.08203	33	0.665	1	11	31
Piedmt	Cornus florida	COFL	age	dbh	centimeters	1/age	lin	-2.14081	1.79176				1.44	51.61	1.37976	33	0.907	1.3	49	31
Piedmt	Cornus florida	COFL	dbh	leaf area	sq. meters	1	loglogw1	-2.46735	4.94153	0.93059			0.39	132.38	0.96467	31	0.722	0	175.8	29
Piedmt	Cornus florida	COFL	dbh	tree ht	meters	1/dbh	loglogw3	0.8693	0.90913	0.00214			2.16	8.81	0.04628	33	0.912	2	11	31
Piedmt	Ilex opaca	ILOP	dbh	age	years	1	loglogw1	-0.24434	3.03586	0.01841			1	60	0.13568	34	0.941	6	55	32
Piedmt	Ilex opaca	ILOP	cdia	dbh	meters	1/cdia	cub	25.4668	-12.7357	3.75655	-0.22632		1.26	55	9.38049	33	0.741	6.6	55.4	29
Piedmt	Ilex opaca	ILOP	dbh	crown dia	meters	1	lin	1.31918	0.12847				1.48	8.38	1.11295	33	0.743	1.7	9.9	31
Piedmt	Ilex opaca	ILOP	dbh	crown ht	meters	1	expow1	0.69646	0.04192	0.10051			2.22	21.16	0.31703	38	0.766	2	23	36
Piedmt	Ilex opaca	ILOP	age	dbh	centimeters	1/age^2	lin	0.35018	0.91075				1.26	55	0.01419	34	0.947	6.6	55.4	32
Piedmt	Ilex opaca	ILOP	dbh	leaf area	sq. meters	1	loglogw1	-9.24323	10.1966	0.59775			0.33	294.95	0.77315	30	0.811	0.6	285.3	28
Piedmt	Ilex opaca	ILOP	dbh	tree ht	meters	1	expow1	0.99411	0.03554	0.09418			2.96	20	0.30688	33	0.701	3	25	31
Piedmt	Juniperus virginiana	JUVI	dbh	age	years	1/dbh^2	lin	0.96454	0.62588				3	67	0.00769	38	0.97	3	60	36
Piedmt	Juniperus virginiana	JUVI	cdia	dbh	meters	1	loglogw1	2.034	2.50629	0.07886			3.28	86.34	0.28081	38	0.894	2.5	89.4	36
Piedmt	Juniperus virginiana	JUVI	dbh	crown dia	meters	1/dbh	quad	0.69545	0.15672	-0.00051			1.21	10.39	0.03092	38	0.908	0.9	12.3	35
Piedmt	Juniperus virginiana	JUVI	dbh	crown ht	meters	1/sqrt(dbh)	cub	-0.98342	0.60891	-0.01049	7e-05		0.93	19.38	0.75795	38	0.857	0.5	20	34
Piedmt	Juniperus virginiana	JUVI	age	dbh	centimeters	1	loglogw1	0.21415	2.93762	0.02967			3.34	85.95	0.17225	38	0.96	2.5	89.4	36
Piedmt	Juniperus virginiana	JUVI	dbh	leaf area	sq. meters	1	loglogw1	-6.54259	8.14197	0.451			0.48	383.58	0.67157	33	0.931	0	380.5	31
Piedmt	Juniperus virginiana	JUVI	dbh	tree ht	meters	1	cub	-1.15219	0.7686	-0.01386	0.0001		1.26	23.96	4.88014	38	0.846	1	24	34
Piedmt	Lagerstroemia spp.	LA6	dbh	age	years	1/dbh	cub	-3.80986	1.76911	-0.04873	0.00051		0	36	0.0949	40	0.909	0	30	36
Piedmt	Lagerstroemia spp.	LA6	cdia	dbh	meters	1	loglogw1	1.84148	2.01972	0.10145			2.87	52.36	0.31851	40	0.803	2.5	55	38
Piedmt	Lagerstroemia spp.	LA6	dbh	crown dia	meters	1	loglogw1	-0.76231	2.24828	0.07344			0.84	10.61	0.271	40	0.814	0.8	11.7	38
Piedmt	Lagerstroemia spp.	LA6	dbh	crown ht	meters	1	loglogw1	-0.36837	1.59001	0.09864			1.07	6.34	0.31407	39	0.618	0.8	9.5	37
Piedmt	Lagerstroemia spp.	LA6	age	dbh	centimeters	1/age^2	cub	2.53768	0.23253	0.10404	-0.002		2.54	52.36	0.11725	40	0.936	2.5	55	36
Piedmt	Lagerstroemia spp.	LA6	dbh	leaf area	sq. meters	1	loglogw1	-6.0069	7.62665	0.94258			0.41	168.58	0.97087	39	0.8	0	165.6	37
Piedmt	Lagerstroemia spp.	LA6	dbh	tree ht	meters	1/dbh	loglogw3	0.20952	1.44069	0.0022			1.73	9.55	0.04695	40	0.883	1.8	12.5	38
Piedmt	Liquidambar styraciflua	LIST	dbh	age	years	1/dbh	quad	0.50045	0.55433	-0.00082			2	60	0.11091	43	0.982	3	55	40
Piedmt	Liquidambar styraciflua	LIST	cdia	dbh	meters	1/sqrt(cdia)	quad	-8.57305	6.7567	-0.08577			2.3	121.37	25.6858	43	0.922	5.6	114.8	40
Piedmt	Liquidambar styraciflua	LIST	dbh	crown dia	meters	1/dbh	lin	1.18893	0.19189				1.63	24.48	0.0785	43	0.927	2	28.7	41
Piedmt	Liquidambar styraciflua	LIST	dbh	crown ht	meters	1	loglogw1	-0.04355	2.13818	0.04898			1.46	27.78	0.22132	43	0.848	4	30	41
Piedmt	Liquidambar styraciflua	LIST	age	dbh	centimeters	1/age	lin	-1.80388	2.05295				2.3	121.37	1.14615	43	0.978	5.6	114.8	41
Piedmt	Liquidambar styraciflua	LIST	dbh	leaf area	sq. meters	1	loglogw1	-6.21471	8.95477	0.64887			1	4582.16	0.80553	29	0.876	1.3	4521.1	27
Piedmt	Liquidambar styraciflua	LIST	dbh	tree ht	meters	1	loglogw1	0.19987	2.1283	0.03236			1.83	34.77	0.17989	43	0.894	4.5	37	41
Piedmt	Malus spp.	MA2	dbh	age	years	1/sqrt(dbh)	loglogw2	-0.36849	2.38471	0.00783			2	50	0.08847	28	0.937	2	30	26
Piedmt	Malus spp.	MA2	cdia	dbh	meters	1	loglogw1	1.29906	2.78359	0.06876			3.01	86.72	0.26222	28	0.876	3.3	53.3	26
Piedmt	Malus spp.	MA2	dbh	crown dia	meters	1/dbh	lin	1.48314	0.19151				2.06	18.55	0.05907	28	0.876	1.7	12.4	26
Piedmt	Malus spp.	MA2	dbh	crown ht	meters	1/dbh^2	lin	1.31572	0.10765				1.64	10.91	0.00473	27	0.652	1	8.5	25
Piedmt	Malus spp.	MA2	age	dbh	centimeters	1/sqrt(age)	loglogw2	0.85023	2.63523	0.00902			3.02	89.12	0.09495	28	0.96	3.3	53.3	26
Piedmt	Malus spp.	MA2	dbh	leaf area	sq. meters	1	loglogw1	-6.9089	8.33124	0.5633			0.62	350.94	0.75053	25	0.894	0	183.2	23
Piedmt	Malus spp.	MA2	dbh	tree ht	meters	1	loglogw1	0.20133	1.36917	0.05445			1.97	9.67	0.23334	28	0.686	2.5	11.5	26
Piedmt	Magnolia grandiflora	MAGR	dbh	age	years	1/sqrt(dbh)	quad	-1.17663	0.90488	-0.0036			0	52	3.16673	44	0.942	0	55	41
Piedmt	Magnolia grandiflora	MAGR	cdia	dbh	meters	1/cdia^2	cub	2.68776	1.12764	0.79314	-0.03509		3.06	83.65	1.52051	41	0.919	2.5	91.7	37
Piedmt	Magnolia grandiflora	MAGR	dbh	crown dia	meters	1/dbh	quad	0.03006	0.25918	-0.0013			0.81	12.6	0.05093	41	0.926	0.5	15.6	38
Piedmt	Magnolia grandiflora	MAGR	dbh	crown ht	meters	1/dbh	quad	-0.44944	0.43681	-0.00269			0.86	17.31	0.17462	39	0.889	0.5	23	36
Piedmt	Magnolia grandiflora	MAGR	age	dbh	centimeters	1/sqrt(age)	quad	3.0608	1.05288	0.00956			3.06	83.65	11.3874	44	0.962	2.5	91.7	41
Piedmt	Magnolia grandiflora	MAGR	dbh	leaf area	sq. meters	1	loglogw1	-4.65064	7.31607	1.24192			1.65	1353.85	1.11442	40	0.786	0.3	1861.1	38
Piedmt	Magnolia grandiflora	MAGR	dbh	tree ht	meters	1/dbh	quad	0.28106	0.44067	-0.00262			1.61	18.79	0.13953	40	0.915	1.6	23	37
Piedmt	Pinus echinata	PIEC	dbh	age	years	1/dbh^2	quad	1.56488	0.51536	0.00052			3	40	0.00055	36	0.997	3	45	33
Piedmt	Pinus echinata	PIEC	cdia	dbh	meters	1/sqrt(cdia)	cub	5.8495	-0.48875	1.18886	-0.06179		2.77	69.3	28.6661	36	0.844	2.8	81.5	32
Piedmt	Pinus echinata	PIEC	dbh	crown dia	meters	1/dbh	lin	1.10341	0.15765				1.54	12.03	0.05914	36	0.886	1.6	14.6	34
Piedmt	Pinus echinata	PIEC	dbh	crown ht	meters	1/dbh^2	quad	0.84956	0.40146	-0.00167			1.95	20.65	0.00642	36	0.904	2	26	33
Piedmt	Pinus echinata	PIEC	age	dbh	centimeters	1/age^2	quad	-3.10659	1.97198	-0.00404			2.77	69.3	0.00477	36	0.997	2.8	81.5	33
Piedmt	Pinus echinata	PIEC	dbh	leaf area	sq. meters	1	loglogw1	-6.29785	8.32028	1.04379			0.31	820.15	1.02166	29	0.82	0.1	885.9	27
Piedmt	Pinus echinata	PIEC	dbh	tree ht	meters	1/dbh	quad	0.23535	0.81451	-0.00618			2.45	27.08	0.24024	34	0.935	2	33	31
Piedmt	Pinus taeda	PITA	dbh	age	years	1/dbh^2	lin	1.42891	0.52862				2	40	0.00122	37	0.991	4	45	35
Piedmt	Pinus taeda	PITA	cdia	dbh	meters	1/cdia	lin	-1.78985	5.14144				2.84	70.71	7.42214	37	0.922	5.1	84.8	35
Piedmt	Pinus taeda	PITA	dbh	crown dia	meters	1/dbh	lin	0.91233	0.18143				1.16	13.74	0.05225	37	0.928	1.4	19.3	35
Piedmt	Pinus taeda	PITA	dbh	crown ht	meters	1/dbh	quad	0.7904	0.4086	-0.00203			1.33	19.52	0.2175	37	0.861	2	25	34
Piedmt	Pinus taeda	PITA	age	dbh	centimeters	1	loglogw1	-0.02355	3.26141	0.0065			1.34	70.69	0.0806	37	0.99	5.1	84.8	35
Piedmt	Pinus taeda	PITA	dbh	leaf area	sq. meters	1	loglogw1	-7.14783	9.29195	0.3701			0.33	845.13	0.60836	30	0.942	0.3	1306	28
Piedmt	Pinus taeda	PITA	dbh	tree ht	meters	1/dbh	cub	4.11019	0.14837	0.00858	-9e-05		4.32	24.93	0.24017	37	0.888	4.5	33	33
Piedmt	Prunus spp.	PR	dbh	age	years	1	quad	0.70876	0.47301	-0.00157			0	30	3.98427	36	0.943	3	30	33
Piedmt	Prunus spp.	PR	cdia	dbh	meters	1/cdia^2	quad	2.83801	0.86799	0.29842			3.36	82.39	0.59413	34	0.937	5.1	87.9	31
Piedmt	Prunus spp.	PR	dbh	crown dia	meters	1	loglogw1	-0.54987	2.16755	0.01901			0.56	14.55	0.13786	34	0.941	2.2	15.5	32
Piedmt	Prunus spp.	PR	dbh	crown ht	meters	1	loglogw1	-0.7693	1.99654	0.05294			0.47	9.13	0.2301	34	0.827	1	10.5	32
Piedmt	Prunus spp.	PR	age	dbh	centimeters	1/age	quad	1.665	1.66173	0.0343			1.67	82.39	2.08321	36	0.954	5.1	87.9	33
Piedmt	Prunus spp.	PR	dbh	leaf area	sq. meters	1	loglogw1	-7.14613	8.76236	0.66214			0.14	675.42	0.81372	35	0.872	0.1	798	33
Piedmt	Prunus spp.	PR	dbh	tree ht	meters	1	quad	2.68504	0.21687	-0.00146			3.04	10.71	2.69656	35	0.675	2	13	32
Piedmt	Prunus yedoensis	PRYE	dbh	age	years	1/dbh^2	lin	1.98249	0.33338				1	28	0.00894	38	0.86	3	30	36
Piedmt	Prunus yedoensis	PRYE	cdia	dbh	meters	1	loglogw1	0.53796	3.76226	0.11403			3.23	74.19	0.33769	38	0.772	5.1	108.7	36
Piedmt	Prunus yedoensis	PRYE	dbh	crown dia	meters	1/sqrt(dbh)	loglogw2	0.00469	1.70777	0.00479			0.57	12.43	0.06921	38	0.875	2.7	14.4	36
Piedmt	Prunus yedoensis	PRYE	dbh	crown ht	meters	1/dbh	quad	1.96577	0.118	-0.00055			2.09	7.66	0.05478	37	0.628	2	12.5	34
Piedmt	Prunus yedoensis	PRYE	age	dbh	centimeters	1	loglogw1	0.85405	2.79754	0.11221			1.05	73.46	0.33498	38	0.775	5.1	108.7	36
Piedmt	Prunus yedoensis	PRYE	dbh	leaf area	sq. meters	1/sqrt(dbh)	loglogw2	-3.43353	5.77981	0.11461			0.38	245.18	0.33854	37	0.774	1.2	700.1	35
Piedmt	Prunus yedoensis	PRYE	dbh	tree ht	meters	1/dbh	loglogw3	0.49589	1.18113	0.00089			1.11	9.53	0.0299	38	0.822	3.5	14.5	36
Piedmt	Pyrus calleryana	PYCA	dbh	age	years	1/dbh	cub	1.65506	0.12643	0.02149	-0.00029		0	30	0.17251	34	0.951	2	30	30
Piedmt	Pyrus calleryana	PYCA	cdia	dbh	meters	1/sqrt(cdia)	lin	-0.03332	3.75789				2.57	55.4	4.26834	32	0.959	2.5	55.9	30
Piedmt	Pyrus calleryana	PYCA	dbh	crown dia	meters	1/dbh	cub	0.96709	0.07657	0.00955	-0.00013		1.03	12.68	0.0264	32	0.965	1	13.7	28
Piedmt	Pyrus calleryana	PYCA	dbh	crown ht	meters	1	loglogw1	-0.12533	1.78205	0.05929			0.34	10.72	0.2435	32	0.825	1.5	13.5	30
Piedmt	Pyrus calleryana	PYCA	age	dbh	centimeters	1/age	lin	0.74946	1.82157				0.75	55.4	1.23435	34	0.947	2.5	55.9	32
Piedmt	Pyrus calleryana	PYCA	dbh	leaf area	sq. meters	1	loglogw1	-5.88101	8.25701	0.42988			0.56	428.83	0.65565	30	0.934	0.1	540.2	28
Piedmt	Pyrus calleryana	PYCA	dbh	tree ht	meters	1	loglogw1	0.49107	1.45782	0.0461			0.74	12.58	0.21471	32	0.802	2.5	15	30
Piedmt	Quercus alba	QUAL	dbh	age	years	1/sqrt(dbh)	lin	1.53037	0.53108				1	68	2.13619	47	0.969	3	80	45
Piedmt	Quercus alba	QUAL	cdia	dbh	meters	1	loglogw1	1.0832	3.05441	0.07211			1.33	123.04	0.26853	47	0.914	1.3	143.5	45
Piedmt	Quercus alba	QUAL	dbh	crown dia	meters	1/dbh^2	cub	0.75315	0.3164	-0.00215	1e-05		1.17	26.12	0.00286	47	0.937	1.2	39.6	43
Piedmt	Quercus alba	QUAL	dbh	crown ht	meters	1/dbh^2	quad	0.42742	0.44117	-0.00179			1.01	27.54	0.00459	47	0.949	1	35	44
Piedmt	Quercus alba	QUAL	age	dbh	centimeters	1/sqrt(age)	lin	-0.48742	1.81656				1.33	123.04	9.42994	47	0.968	1.3	143.5	45
Piedmt	Quercus alba	QUAL	dbh	leaf area	sq. meters	1	loglogw1	-3.84162	7.35824	0.68617			1.4	3782.1	0.82835	39	0.889	0.1	4951.8	37
Piedmt	Quercus alba	QUAL	dbh	tree ht	meters	1/dbh	quad	1.15056	0.5531	-0.00232			1.88	34.17	0.31868	47	0.932	2	42	44
Piedmt	Quercus nigra	QUNI	dbh	age	years	1/dbh	lin	-0.897	0.55706				0	71	0.19816	45	0.977	3	65	43
Piedmt	Quercus nigra	QUNI	cdia	dbh	meters	1/cdia^2	cub	19.8416	-5.53418	0.93825	-0.02353		5.81	112.17	0.99663	45	0.879	7.6	118.9	41
Piedmt	Quercus nigra	QUNI	dbh	crown dia	meters	1/dbh	quad	1.67425	0.30128	-0.00109			3.01	21.69	0.12311	45	0.879	3	27.9	42
Piedmt	Quercus nigra	QUNI	dbh	crown ht	meters	1	loglogw1	-0.75558	2.42514	0.08409			1.83	20.78	0.28998	45	0.743	2.5	33	43
Piedmt	Quercus nigra	QUNI	age	dbh	centimeters	1/age	cub	4.51977	1.26018	0.02646	-0.00032		4.52	112.17	0.91664	45	0.982	7.6	118.9	41
Piedmt	Quercus nigra	QUNI	dbh	leaf area	sq. meters	1/dbh	loglogw3	-6.74235	9.29396	0.00935			0.52	3722.03	0.0967	37	0.938	1.6	4163.6	35
Piedmt	Quercus nigra	QUNI	dbh	tree ht	meters	1	loglogw1	-0.33641	2.30199	0.05163			2.54	25.86	0.22721	45	0.809	4.5	37	43
Piedmt	Quercus phellos	QUPH	dbh	age	years	1/dbh	cub	-1.08545	0.84501	-0.00707	5e-05		2	71	0.80561	49	0.926	3	85	45
Piedmt	Quercus phellos	QUPH	cdia	dbh	meters	1/cdia^2	cub	6.91595	-0.71736	0.52878	-0.01345		2.26	110.14	0.57234	49	0.946	5.6	129.5	45
Piedmt	Quercus phellos	QUPH	dbh	crown dia	meters	1/dbh	quad	0.80201	0.27153	-0.00071			1.41	22.13	0.06234	49	0.95	1.4	26.1	46
Piedmt	Quercus phellos	QUPH	dbh	crown ht	meters	1/sqrt(dbh)	quad	1.62462	0.36651	-0.0016			2.44	22.63	1.33737	49	0.839	1.5	28	46
Piedmt	Quercus phellos	QUPH	age	dbh	centimeters	1/age	quad	-1.96949	2.12788	-0.00773			2.26	110.14	3.54431	49	0.93	5.6	129.5	46
Piedmt	Quercus phellos	QUPH	dbh	leaf area	sq. meters	1	loglogw1	-6.96374	9.57973	0.45081			0.45	4151.5	0.67142	44	0.909	0.9	9516	42
Piedmt	Quercus phellos	QUPH	dbh	tree ht	meters	1/dbh^2	quad	2.91888	0.45131	-0.002			3.93	28.35	0.00863	48	0.877	3.5	36	45
Piedmt	Quercus rubra	QURU	dbh	age	years	1/dbh	lin	0.21255	0.53628				0	53	0.98106	40	0.912	3	75	38
Piedmt	Quercus rubra	QURU	cdia	dbh	meters	1/cdia^2	cub	2.24638	0.51064	0.35944	-0.00828		5.61	96.02	0.39242	38	0.958	3.6	119.4	34
Piedmt	Quercus rubra	QURU	dbh	crown dia	meters	1/dbh	quad	0.96017	0.31568	-0.00106			2.17	21.52	0.05251	38	0.965	1.8	27.3	35
Piedmt	Quercus rubra	QURU	dbh	crown ht	meters	1/dbh^2	cub	2.98316	0.2111	0.0027	-3e-05		3.84	25.24	0.00533	39	0.865	3.5	37	35
Piedmt	Quercus rubra	QURU	age	dbh	centimeters	1/age	lin	3.86968	1.73866				3.87	96.02	5.45055	40	0.918	3.6	119.4	38
Piedmt	Quercus rubra	QURU	dbh	leaf area	sq. meters	1/sqrt(dbh)	loglogw2	-4.94756	7.97593	0.07693			1.24	1914.93	0.27736	35	0.943	0.3	6833.7	33
Piedmt	Quercus rubra	QURU	dbh	tree ht	meters	1/dbh	cub	4.21839	0.25472	0.00317	-3e-05		5.25	30.23	0.42456	40	0.844	5	43	36
Piedmt	Ulmus alata	ULAL	dbh	age	years	1	lin	2.30724	0.41437				3	40	0.53646	32	0.992	4	35	30
Piedmt	Ulmus alata	ULAL	cdia	dbh	meters	1	loglogw1	1.02714	2.92149	0.09057			4.32	90.55	0.30094	32	0.824	6.6	81.5	30
Piedmt	Ulmus alata	ULAL	dbh	crown dia	meters	1/dbh^2	lin	1.94688	0.22516				2.38	22.34	0.00465	32	0.809	2.9	24.8	30
Piedmt	Ulmus alata	ULAL	dbh	crown ht	meters	1/dbh	cub	-3.0114	1.04576	-0.02023	0.00014		1.14	27.59	0.15302	30	0.861	2.5	20	26
Piedmt	Ulmus alata	ULAL	age	dbh	centimeters	1	lin	-5.25658	2.39512				1.93	90.55	3.1008	32	0.992	6.6	81.5	30
Piedmt	Ulmus alata	ULAL	dbh	leaf area	sq. meters	1/dbh^2	loglogw4	-3.38495	6.48283	0.00104			0.96	1077.16	0.03228	21	0.826	2.9	1070.4	19
Piedmt	Ulmus alata	ULAL	dbh	tree ht	meters	1	cub	-4.04343	1.37259	-0.02725	0.00018		1.4	33.64	4.85699	31	0.847	3	23	27
SacVal	Cedrus deodara	CEDE	dbh	age	years	1	loglogw1	-1.60213	3.82378	0.30389	0.09235		1	88	0.55126	60	0.865	4	92	58
SacVal	Cedrus deodara	CEDE	cdia	dbh	meters	1/cdia	lin	-6.32322	5.5559				4.48	101.69	9.85318	61	0.92	6.2	135.6	59
SacVal	Cedrus deodara	CEDE	dbh	crown dia	meters	1/dbh	cub	0.5258	0.28597	-0.0022	1e-05		0.75	18.15	0.04818	61	0.94	1.5	30	57
SacVal	Cedrus deodara	CEDE	dbh	crown ht	meters	1/sqrt(dbh)	cub	-2.38474	0.62219	-0.00525	2e-05		0.37	22.47	0.94763	59	0.883	1.4	27.2	55
SacVal	Cedrus deodara	CEDE	age	dbh	centimeters	1	loglogw1	0.60029	2.65795	0.0611562			0.77	100.42	0.2473	60	0.882	6.2	135.6	58
SacVal	Cedrus deodara	CEDE	dbh	leaf area	sq. meters	1	loglogw1	-2.33574	5.74921	0.25962			0.01	750.89	0.50953	53	0.842	3	1132.7	51
SacVal	Cedrus deodara	CEDE	dbh	tree ht	meters	1/sqrt(dbh)	quad	-1.01371	0.53995	-0.00265			0.33	26.45	1.0949	59	0.896	1.8	30.2	56
SacVal	Celtis occidentalis	CEOC	dbh	age	years	1/dbh^2	lin	-0.84351	0.7832				1	77	0.04246	37	0.912	1	66	35
SacVal	Celtis occidentalis	CEOC	cdia	dbh	meters	1	loglogw1	1.41616	2.42584	0.09906			2.36	69.02	0.31474	37	0.859	2	94.6	35
SacVal	Celtis occidentalis	CEOC	dbh	crown dia	meters	1	loglogw1	-0.40489	2.1918	0.04639			1.06	16.08	0.21539	37	0.898	0.8	24.2	35
SacVal	Celtis occidentalis	CEOC	dbh	crown ht	meters	1/dbh^2	lin	1.50507	0.18403				1.94	14.21	0.00375	36	0.865	1.9	17.2	34
SacVal	Celtis occidentalis	CEOC	age	dbh	centimeters	1/age^2	quad	0.59486	1.77385	-0.0115			2.36	69.02	0.09459	37	0.94	2	94.6	34
SacVal	Celtis occidentalis	CEOC	dbh	leaf area	sq. meters	1	loglogw1	-1.99866	5.66181	0.3524			0.86	615.24	0.59364	35	0.89	0.2	1118.3	33
SacVal	Celtis occidentalis	CEOC	dbh	tree ht	meters	1/dbh	quad	2.59923	0.27032	-0.00124			3.23	15.33	0.11297	36	0.865	2.8	21.8	33
SacVal	Celtis sinensis	CESI4	dbh	age	years	1/dbh^2	lin	-1.02931	0.7272				1	82	0.04494	59	0.891	1	89	57
SacVal	Celtis sinensis	CESI4	cdia	dbh	meters	1/cdia^2	quad	-2.07328	2.4363	0.10223			3.2	114.37	0.63201	59	0.918	2.2	142	56
SacVal	Celtis sinensis	CESI4	dbh	crown dia	meters	1/dbh	cub	1.11854	0.37584	-0.00285	1e-05		2.29	21.72	0.07333	59	0.934	1.8	26	55
SacVal	Celtis sinensis	CESI4	dbh	crown ht	meters	1/sqrt(dbh)	lin	2.79745	0.13252				3.22	17.95	0.90626	59	0.733	0.8	21.4	57
SacVal	Celtis sinensis	CESI4	age	dbh	centimeters	1/age	cub	0.83516	2.40233	-0.04183	0.00036		3.2	114.37	3.25426	59	0.916	2.2	142	55
SacVal	Celtis sinensis	CESI4	dbh	leaf area	sq. meters	1	loglogw1	-2.1349	5.80867	0.21015			1.45	1142.2	0.45842	57	0.866	2.9	1485	55
SacVal	Celtis sinensis	CESI4	dbh	tree ht	meters	1/sqrt(dbh)	lin	4.2474	0.15487				4.74	21.96	1.12048	59	0.752	2.8	29.2	57
SacVal	Cinnamomum camphora	CICA	dbh	age	years	1/dbh^2	lin	-1.99343	0.65859				0	113	0.02582	61	0.922	0.1	102	59
SacVal	Cinnamomum camphora	CICA	cdia	dbh	meters	1	loglogw1	1.30469	2.89706	0.04419			2.96	133.79	0.21021	61	0.943	3.1	135.8	59
SacVal	Cinnamomum camphora	CICA	dbh	crown dia	meters	1/dbh^2	cub	0.40772	0.30821	-0.00202	1e-05		1.3	24.96	0.00115	61	0.964	1.2	28.3	57
SacVal	Cinnamomum camphora	CICA	dbh	crown ht	meters	1/dbh	quad	1.30265	0.22261	-0.00071			1.96	18.3	0.13862	61	0.848	1.2	27	58
SacVal	Cinnamomum camphora	CICA	age	dbh	centimeters	1/age^2	quad	2.9586	1.90342	-0.0066			2.96	133.79	0.16782	61	0.937	3.1	135.8	58
SacVal	Cinnamomum camphora	CICA	dbh	leaf area	sq. meters	1	loglogw1	-2.43827	5.96978	0.14195			0.79	1260.72	0.37677	53	0.914	7.9	1844.7	51
SacVal	Cinnamomum camphora	CICA	dbh	tree ht	meters	1/dbh	quad	2.0156	0.28138	-0.00106			2.84	20.68	0.16536	61	0.864	3	30	58
SacVal	Fraxinus velutina 'Modesto'	FRVE_G	dbh	age	years	1	loglogw1	-2.61466	4.43216	0.3084	0.09511		0	77	0.55534	39	0.891	1	72	37
SacVal	Fraxinus velutina 'Modesto'	FRVE_G	cdia	dbh	meters	1	lin	1.09207	4.93654				1.22	116.04	237.191	40	0.729	4.4	145.5	38
SacVal	Fraxinus velutina 'Modesto'	FRVE_G	dbh	crown dia	meters	1/dbh	lin	2.70647	0.15246				2.89	20.4	0.11928	40	0.816	2.7	25	38
SacVal	Fraxinus velutina 'Modesto'	FRVE_G	dbh	crown ht	meters	1/dbh	lin	2.88187	0.11198				3.02	15.88	0.08311	40	0.775	3	18.5	38
SacVal	Fraxinus velutina 'Modesto'	FRVE_G	age	dbh	centimeters	1/age^2	cub	1.22216	3.08089	-0.06277	0.00055		1.22	116.04	0.10097	39	0.953	4.4	145.5	35
SacVal	Fraxinus velutina 'Modesto'	FRVE_G	dbh	leaf area	sq. meters	1/dbh^2	quad	-0.74319	2.93741	0.04194			2.91	904.97	5.11589	37	0.796	10	1007	34
SacVal	Fraxinus velutina 'Modesto'	FRVE_G	dbh	tree ht	meters	1/dbh^2	quad	2.97386	0.2269	-0.00087			3.25	17.62	0.002	40	0.892	4	23	37
SacVal	Ginkgo biloba	GIBI	dbh	age	years	1/dbh^2	cub	-0.30338	0.63908	0.01137	-8e-05		1	117	0.05547	60	0.936	0.1	112	56
SacVal	Ginkgo biloba	GIBI	cdia	dbh	meters	1/cdia	quad	-1.39794	3.51608	0.05285			2.17	120.81	6.97642	57	0.908	0.6	117.1	54
SacVal	Ginkgo biloba	GIBI	dbh	crown dia	meters	1/sqrt(dbh)	cub	0.74902	0.3336	-0.00273	1e-05		1.46	23.61	0.45037	57	0.914	1.3	24.2	53
SacVal	Ginkgo biloba	GIBI	dbh	crown ht	meters	1/dbh	quad	1.93745	0.26338	-0.00063			2.51	23.92	0.14977	56	0.904	2.2	26.4	53
SacVal	Ginkgo biloba	GIBI	age	dbh	centimeters	1/age	cub	0.45133	1.73857	-0.02112	0.00013		2.17	120.81	2.07298	60	0.95	0.6	117.1	56
SacVal	Ginkgo biloba	GIBI	dbh	leaf area	sq. meters	1/dbh^2	cub	0.5349	0.45713	0.16613	-0.00092		2.3	852.53	3.83356	57	0.894	0.9	983.6	53
SacVal	Ginkgo biloba	GIBI	dbh	tree ht	meters	1/dbh^2	quad	1.96732	0.37958	-0.00158			2.78	24.77	0.00461	56	0.947	2.2	30.2	53
SacVal	Lagerstroemia indica	LAIN	dbh	age	years	1	loglogw1	-2.7049	5.28435	0.2628	0.06906		0	63	0.51264	26	0.973	0.1	64	24
SacVal	Lagerstroemia indica	LAIN	cdia	dbh	meters	1/cdia^2	lin	-1.18032	3.76366				3.22	40.37	1.12954	28	0.84	2.1	42	26
SacVal	Lagerstroemia indica	LAIN	dbh	crown dia	meters	1	loglogw1	-0.30397	1.86299	0.06698			0.94	8.68	0.25881	28	0.811	0.9	10.4	26
SacVal	Lagerstroemia indica	LAIN	dbh	crown ht	meters	1	lin	2.54076	0.10439				2.75	6.75	0.82099	28	0.614	1.7	7.5	26
SacVal	Lagerstroemia indica	LAIN	age	dbh	centimeters	1/age	cub	2.02636	1.21727	-0.02189	0.00019		2.03	40.37	0.28049	26	0.974	2.1	42	22
SacVal	Lagerstroemia indica	LAIN	dbh	leaf area	sq. meters	1	loglogw1	-0.91994	4.46094	0.28072			1.07	165.45	0.52983	27	0.858	0.7	221	25
SacVal	Lagerstroemia indica	LAIN	dbh	tree ht	meters	1	lin	3.60759	0.12892				3.87	8.81	1.01437	28	0.663	2.7	10	26
SacVal	Liquidambar styraciflua	LIST	dbh	age	years	1/dbh^2	lin	-2.82685	0.73094				0	96	0.03238	42	0.912	0.1	66	40
SacVal	Liquidambar styraciflua	LIST	cdia	dbh	meters	1	loglogw1	1.53712	2.67556	0.07225			3.71	88.39	0.26879	43	0.881	3.4	120.5	41
SacVal	Liquidambar styraciflua	LIST	dbh	crown dia	meters	1	loglogw1	-0.74549	2.24329	0.03499			1.3	13.93	0.18705	43	0.898	1.3	19.5	41
SacVal	Liquidambar styraciflua	LIST	dbh	crown ht	meters	1/dbh	quad	1.98065	0.34302	-0.00092			3.24	25.14	0.22812	44	0.875	3.5	28.5	41
SacVal	Liquidambar styraciflua	LIST	age	dbh	centimeters	1/age	quad	3.71462	1.76501	-0.0092			3.71	88.39	3.0285	42	0.944	3.4	120.5	39
SacVal	Liquidambar styraciflua	LIST	dbh	leaf area	sq. meters	1	loglogw1	-1.29846	5.43689	0.17177			3.97	1067.97	0.41445	38	0.888	6.4	1737.8	36
SacVal	Liquidambar styraciflua	LIST	dbh	tree ht	meters	1/dbh	quad	1.92152	0.42496	-0.00142			3.48	28.38	0.19712	44	0.916	3.5	34	41
SacVal	Liriodendron tulipifera	LITU	dbh	age	years	1	loglogw1	-2.38634	4.313	0.31702	0.1005		0	77	0.56305	56	0.936	0.1	89	54
SacVal	Liriodendron tulipifera	LITU	cdia	dbh	meters	1/cdia^2	quad	-1.91865	3.61531	0.07061			4.08	104.81	0.64693	63	0.947	2.1	140.8	60
SacVal	Liriodendron tulipifera	LITU	dbh	crown dia	meters	1	loglogw1	-0.82122	2.42335	0.03359			0.48	18.5	0.18326	63	0.927	1	24.6	61
SacVal	Liriodendron tulipifera	LITU	dbh	crown ht	meters	1/sqrt(dbh)	quad	0.07385	0.4792	-0.00229			0.92	25.15	1.0645	62	0.909	2	30.8	59
SacVal	Liriodendron tulipifera	LITU	age	dbh	centimeters	1/age	cub	1.77312	2.34134	-0.03313	0.00026		1.77	104.81	3.67372	56	0.945	2.1	140.8	52
SacVal	Liriodendron tulipifera	LITU	dbh	leaf area	sq. meters	1/dbh^2	quad	-26.7561	5.37789	0.05555			9.48	1147.12	8.01561	61	0.857	5.3	1991.8	58
SacVal	Liriodendron tulipifera	LITU	dbh	tree ht	meters	1/dbh	quad	1.37343	0.51365	-0.00243			2.28	28.47	0.22439	63	0.917	3.1	35.2	60
SacVal	Magnolia grandiflora	MAGR	dbh	age	years	1	loglogw1	-1.42808	3.80783	0.29032	0.08428		1	115	0.53881	54	0.898	2	99	52
SacVal	Magnolia grandiflora	MAGR	cdia	dbh	meters	1	loglogw1	1.23128	3.01826	0.05531			3.14	91.01	0.23518	67	0.886	4.5	130.4	65
SacVal	Magnolia grandiflora	MAGR	dbh	crown dia	meters	1	loglogw1	-0.74812	2.27117	0.01972			0.28	14.5	0.14044	67	0.918	1.7	18.9	65
SacVal	Magnolia grandiflora	MAGR	dbh	crown ht	meters	1	loglogw1	-0.88799	2.34944	0.05248			0.25	14.31	0.22908	66	0.817	0.8	18.8	64
SacVal	Magnolia grandiflora	MAGR	age	dbh	centimeters	1	loglogw1	0.8897	2.29879	0.07535			1.18	89.25	0.27449	54	0.867	4.5	130.4	52
SacVal	Magnolia grandiflora	MAGR	dbh	leaf area	sq. meters	1/sqrt(dbh)	loglogw2	-1.98269	5.33091	0.04192			0.04	511.07	0.20476	67	0.886	1.7	862.7	65
SacVal	Magnolia grandiflora	MAGR	dbh	tree ht	meters	1	loglogw1	0.03554	1.86114	0.03187			0.68	17.16	0.17853	66	0.822	2.6	22.6	64
SacVal	Pistacia chinensis	PICH	dbh	age	years	1	loglogw1	-1.35195	3.66958	0.30916	0.09558		1	100	0.55602	38	0.893	2	64	36
SacVal	Pistacia chinensis	PICH	cdia	dbh	meters	1/cdia^2	cub	4.04044	-0.88374	0.52717	-0.01629		1.4	77	0.21707	37	0.961	4	82	33
SacVal	Pistacia chinensis	PICH	dbh	crown dia	meters	1	loglogw1	-0.4355	2.26233	0.01719			0.52	18.03	0.1311	37	0.948	1.6	21.5	35
SacVal	Pistacia chinensis	PICH	dbh	crown ht	meters	1	loglogw1	-0.29023	1.92451	0.04048			0.64	12.75	0.20119	37	0.847	1.8	16	35
SacVal	Pistacia chinensis	PICH	age	dbh	centimeters	1	loglogw1	1.08846	2.11365	0.04575			1.47	76.05	0.21389	38	0.919	4	82	36
SacVal	Pistacia chinensis	PICH	dbh	leaf area	sq. meters	1	loglogw1	-1.53901	5.68848	0.22602			0.23	1056.67	0.47542	33	0.902	1.5	1056.3	31
SacVal	Pistacia chinensis	PICH	dbh	tree ht	meters	1/sqrt(dbh)	quad	2.62862	0.32163	-0.00177			3.1	16.87	0.36621	37	0.901	3.5	19	34
SacVal	Platanus x acerifolia	PLAC	dbh	age	years	1/dbh	cub	-0.86822	0.41592	0.01295	-9e-05		0	120	1.45871	50	0.939	0.1	100	46
SacVal	Platanus x acerifolia	PLAC	cdia	dbh	meters	1/cdia	lin	-5.89056	4.49545				3.53	126.7	10.9266	52	0.907	3.5	133.9	50
SacVal	Platanus x acerifolia	PLAC	dbh	crown dia	meters	1/dbh	lin	2.04178	0.20974				2.78	28.62	0.12162	52	0.92	1.7	30.4	50
SacVal	Platanus x acerifolia	PLAC	dbh	crown ht	meters	1/dbh	lin	2.75104	0.19594				3.44	27.58	0.19733	52	0.861	2.2	30	50
SacVal	Platanus x acerifolia	PLAC	age	dbh	centimeters	1/age	quad	3.52669	1.43849	-0.00343			3.53	126.7	4.00422	50	0.937	3.5	133.9	47
SacVal	Platanus x acerifolia	PLAC	dbh	leaf area	sq. meters	1	loglogw1	-1.47888	5.53503	0.30078			3.77	1684.93	0.54843	44	0.872	3.1	2949.2	42
SacVal	Platanus x acerifolia	PLAC	dbh	tree ht	meters	1/dbh^2	cub	2.52631	0.43966	-0.00444	2e-05		4.02	35.56	0.00467	52	0.901	4.1	36.5	48
SacVal	Prunus cerasifera cvs.	PRCE	dbh	age	years	1	loglogw1	-1.28919	3.7347	0.36063	0.13006		0	60	0.60053	31	0.856	1	55	29
SacVal	Prunus cerasifera cvs.	PRCE	cdia	dbh	meters	1	loglogw1	1.99465	1.83708	0.14909			2.33	42.25	0.38612	34	0.645	2.9	64	32
SacVal	Prunus cerasifera cvs.	PRCE	dbh	crown dia	meters	1/dbh	cub	-0.7032	0.59161	-0.01452	0.00012		0.65	7.31	0.06024	34	0.846	0.7	10.7	30
SacVal	Prunus cerasifera cvs.	PRCE	dbh	crown ht	meters	1/dbh^2	lin	1.71524	0.11446				1.72	6.47	0.00239	34	0.745	2	11.4	32
SacVal	Prunus cerasifera cvs.	PRCE	age	dbh	centimeters	1	loglogw1	1.41379	1.62752	0.05803			0.01	41.51	0.2409	31	0.868	2.9	64	29
SacVal	Prunus cerasifera cvs.	PRCE	dbh	leaf area	sq. meters	1	loglogw1	-1.67724	4.71336	0.42252			1.05	122.82	0.65002	33	0.734	0.6	174.1	31
SacVal	Prunus cerasifera cvs.	PRCE	dbh	tree ht	meters	1/dbh	lin	2.66095	0.14391				2.66	8.63	0.08462	34	0.701	2.6	13.4	32
SacVal	Pyrus calleryana cvs.	PYCA	dbh	age	years	1	loglogw1	-1.86365	3.6845	0.3707	0.13742		1	40	0.60885	31	0.85	1	37	29
SacVal	Pyrus calleryana cvs.	PYCA	cdia	dbh	meters	1/sqrt(cdia)	lin	0.83165	3.45073				3.59	51.96	5.3644	30	0.933	2.7	56.6	28
SacVal	Pyrus calleryana cvs.	PYCA	dbh	crown dia	meters	1/dbh	lin	0.344	0.26912				0.55	16.73	0.044	30	0.947	1.3	13.9	28
SacVal	Pyrus calleryana cvs.	PYCA	dbh	crown ht	meters	1/dbh^2	lin	1.94791	0.23194				2.13	16.07	0.00604	30	0.83	2.5	15	28
SacVal	Pyrus calleryana cvs.	PYCA	age	dbh	centimeters	1	loglogw1	1.84201	1.59266	0.03767			0.77	60.9	0.19409	31	0.921	2.7	56.6	29
SacVal	Pyrus calleryana cvs.	PYCA	dbh	leaf area	sq. meters	1	loglogw1	-2.27761	5.83906	0.43541			0.03	543.39	0.65986	30	0.822	1	421.8	28
SacVal	Pyrus calleryana cvs.	PYCA	dbh	tree ht	meters	1/dbh^2	quad	1.96046	0.39902	-0.00255			2.27	16.8	0.00576	30	0.896	3	18.5	27
SacVal	Quercus agrifolia	QUAG	dbh	age	years	1/dbh^2	quad	-1.75357	0.79787	-0.00149			0	76	0.03147	60	0.917	0.1	74	57
SacVal	Quercus agrifolia	QUAG	cdia	dbh	meters	1/cdia^2	cub	-0.26433	1.90626	0.25909	-0.0068		3.7	96.89	0.34343	65	0.966	2.4	134.5	61
SacVal	Quercus agrifolia	QUAG	dbh	crown dia	meters	1/dbh	quad	1.07657	0.26335	-0.00051			1.67	21.77	0.05096	65	0.96	1.1	27	62
SacVal	Quercus agrifolia	QUAG	dbh	crown ht	meters	1/dbh	lin	1.01394	0.18263				1.43	18.71	0.10063	65	0.898	1.5	23.6	63
SacVal	Quercus agrifolia	QUAG	age	dbh	centimeters	1/age^2	cub	2.25596	1.43382	0.01147	-0.00018		2.26	96.89	0.14166	60	0.938	2.4	134.5	56
SacVal	Quercus agrifolia	QUAG	dbh	leaf area	sq. meters	1	loglogw1	-2.81885	6.20463	0.30395			0.35	925.53	0.55132	58	0.877	0.5	1799.6	56
SacVal	Quercus agrifolia	QUAG	dbh	tree ht	meters	1/dbh	quad	1.58199	0.26378	-0.00071			2.17	20.52	0.09528	65	0.916	2.5	25.2	62
SacVal	Quercus lobata	QULO	dbh	age	years	1/dbh^2	cub	-3.3546	1.0439	-0.00773	8e-05		0	220	0.07302	48	0.908	1	220	44
SacVal	Quercus lobata	QULO	cdia	dbh	meters	1/cdia^2	quad	-1.16798	2.72447	0.09557			3.94	135.26	0.79134	52	0.924	3.7	139.4	49
SacVal	Quercus lobata	QULO	dbh	crown dia	meters	1/dbh	quad	1.09621	0.30138	-0.00101			1.78	23.43	0.07651	52	0.939	1.6	28.7	49
SacVal	Quercus lobata	QULO	dbh	crown ht	meters	1	loglogw1	-0.05648	1.88419	0.05751			1.37	19.19	0.23982	52	0.792	2.5	28.5	50
SacVal	Quercus lobata	QULO	age	dbh	centimeters	1/age	cub	2.28211	1.66463	-0.01025	2e-05		2.28	135.26	3.15861	48	0.921	3.7	139.4	44
SacVal	Quercus lobata	QULO	dbh	leaf area	sq. meters	1	loglogw1	-1.57301	5.5834	0.17214			0.8	1658.8	0.41489	50	0.919	4.1	2761.7	48
SacVal	Quercus lobata	QULO	dbh	tree ht	meters	1	loglogw1	0.18007	1.86782	0.04209			1.71	23.62	0.20516	52	0.837	2.5	31.5	50
SacVal	Quercus rubra	QURU	dbh	age	years	1/dbh^2	quad	-0.48253	0.48559	0.00471			0	97	0.05141	41	0.87	1	110	38
SacVal	Quercus rubra	QURU	cdia	dbh	meters	1/cdia^2	quad	1.08594	1.96862	0.08911			3.22	89.67	0.48872	41	0.931	3.5	125.8	38
SacVal	Quercus rubra	QURU	dbh	crown dia	meters	1/dbh	quad	0.43051	0.383	-0.00163			1.65	21.64	0.07676	41	0.947	1.4	25.6	38
SacVal	Quercus rubra	QURU	dbh	crown ht	meters	1/dbh	quad	1.89117	0.32525	-0.00133			2.93	20.4	0.16831	40	0.86	3.5	26	37
SacVal	Quercus rubra	QURU	age	dbh	centimeters	1/age	quad	3.22204	1.76438	-0.009			3.22	89.67	3.15973	41	0.91	3.5	125.8	38
SacVal	Quercus rubra	QURU	dbh	leaf area	sq. meters	1	loglogw1	-1.78897	6.00207	0.30299			2.72	1714.19	0.55044	38	0.886	5.1	2673.1	36
SacVal	Quercus rubra	QURU	dbh	tree ht	meters	1/dbh	quad	2.44368	0.39304	-0.00165			3.69	24.39	0.1856	40	0.888	4	32	37
SacVal	Sequoia sempervirens	SESE	dbh	age	years	1/dbh	quad	0.3571	0.42835	-0.00055			1	65	0.31742	48	0.936	1	59	45
SacVal	Sequoia sempervirens	SESE	cdia	dbh	meters	1/cdia^2	quad	-7.13054	6.73749	0.28138			1.73	173.48	2.64817	52	0.928	2.2	173.1	49
SacVal	Sequoia sempervirens	SESE	dbh	crown dia	meters	1/dbh	quad	1.18331	0.13022	-0.00031			1.41	14.34	0.02268	52	0.937	1.4	16.3	49
SacVal	Sequoia sempervirens	SESE	dbh	crown ht	meters	1/dbh	quad	1.05676	0.34661	-0.00098			1.65	31.84	0.17425	51	0.923	1.6	37	48
SacVal	Sequoia sempervirens	SESE	age	dbh	centimeters	1/age	lin	-0.95197	2.68361				1.73	173.48	6.1487	48	0.938	2.2	173.1	46
SacVal	Sequoia sempervirens	SESE	dbh	leaf area	sq. meters	1/dbh^2	cub	-3.21552	1.87303	0.07726	-0.00026		0.26	1290.61	3.50984	49	0.871	0.9	1404.6	45
SacVal	Sequoia sempervirens	SESE	dbh	tree ht	meters	1/dbh	quad	1.04443	0.38756	-0.00112			1.71	34.59	0.17733	51	0.935	1.6	38	48
SacVal	Ulmus parvifolia	ULPA	dbh	age	years	1	loglogw1	-3.18841	4.96481	0.22449	0.0504		0	81	0.47381	60	0.972	0.1	66	58
SacVal	Ulmus parvifolia	ULPA	cdia	dbh	meters	1/cdia^2	cub	1.22722	0.48602	0.28817	-0.00715		4.39	104.3	0.51681	62	0.927	2.3	98.2	58
SacVal	Ulmus parvifolia	ULPA	dbh	crown dia	meters	1	loglogw1	-0.17418	2.1571	0.02564			1.28	23.34	0.16012	62	0.927	1.4	27.1	60
SacVal	Ulmus parvifolia	ULPA	dbh	crown ht	meters	1	loglogw1	-0.37862	2.10006	0.06546			1.07	17.58	0.25585	61	0.825	1.2	21.6	59
SacVal	Ulmus parvifolia	ULPA	age	dbh	centimeters	1/age	cub	2.3358	2.08455	-0.02888	0.00023		2.34	104.3	2.06613	60	0.962	2.3	98.2	56
SacVal	Ulmus parvifolia	ULPA	dbh	leaf area	sq. meters	1/sqrt(dbh)	loglogw2	-1.2326	5.51229	0.0351			0.84	1679.71	0.18735	59	0.96	0.8	1838.6	57
SacVal	Ulmus parvifolia	ULPA	dbh	tree ht	meters	1/dbh	quad	2.21114	0.34937	-0.00169			3.02	20.32	0.2072	61	0.86	2.7	24.8	58
SacVal	Zelkova serrata	ZESE	dbh	age	years	1	loglogw1	-1.64786	3.64024	0.25293	0.06397		0	80	0.50292	46	0.937	1	64	44
SacVal	Zelkova serrata	ZESE	cdia	dbh	meters	1/cdia^2	cub	1.25743	0.9739	0.28534	-0.0063		3.45	121.72	0.65942	47	0.918	3.5	139.8	43
SacVal	Zelkova serrata	ZESE	dbh	crown dia	meters	1/dbh	quad	1.57578	0.28948	-0.00073			1.96	25.99	0.11066	47	0.926	1.9	31.7	44
SacVal	Zelkova serrata	ZESE	dbh	crown ht	meters	1/dbh	lin	2.20794	0.15519				2.41	21.1	0.09062	47	0.888	2.1	25	45
SacVal	Zelkova serrata	ZESE	age	dbh	centimeters	1/age^2	quad	1.32502	2.13762	-0.00791			1.33	121.72	0.177	46	0.934	3.5	139.8	43
SacVal	Zelkova serrata	ZESE	dbh	leaf area	sq. meters	1	loglogw1	-2.82345	6.64613	0.21755			0.04	2354.59	0.46643	45	0.918	3.8	3751.7	43
SacVal	Zelkova serrata	ZESE	dbh	tree ht	meters	1/dbh	quad	3.33612	0.23304	-0.00045			3.64	25.04	0.10524	47	0.908	4.1	29	44
SoCalC	Callistemon citrinus	CACI	dbh	age	years	1/dbh^2	quad	-5.57665	2.24729	-0.02217			0	55	0.05037	28	0.964	0	50	25
SoCalC	Callistemon citrinus	CACI	cdia	dbh	meters	1/cdia^2	quad	0.76334	2.76864	0.29416			2.53	35.4	0.27999	28	0.97	2.5	38	25
SoCalC	Callistemon citrinus	CACI	dbh	crown dia	meters	1	loglogw1	-0.96023	2.24998	0.00872			0.65	6.83	0.09336	28	0.952	0.6	6.9	26
SoCalC	Callistemon citrinus	CACI	dbh	crown ht	meters	1/dbh^2	lin	0.70461	0.12253				1.02	5.04	0.0022	28	0.767	1	5.5	26
SoCalC	Callistemon citrinus	CACI	age	dbh	centimeters	1/age^2	lin	2.53402	0.59754				2.53	35.4	0.0099	28	0.971	2.5	38	26
SoCalC	Callistemon citrinus	CACI	dbh	leaf area	sq. meters	1/dbh^2	loglogw4	-0.90528	3.85103	0.00066			0.99	84.2	0.02563	27	0.965	1	100.7	25
SoCalC	Callistemon citrinus	CACI	dbh	tree ht	meters	1/sqrt(dbh)	quad	0.61551	0.35108	-0.00472			1.47	7.13	0.09734	28	0.835	1.5	7.6	25
SoCalC	Cedrus deodara	CEDE	dbh	age	years	1/dbh	quad	0.55334	0.6859	-0.00274			0	50	0.51184	26	0.92	1	50	23
SoCalC	Cedrus deodara	CEDE	cdia	dbh	meters	1/cdia^2	loglogw4	1.00866	3.25997	0.00033			2.37	111.88	0.01805	26	0.993	2.5	125	24
SoCalC	Cedrus deodara	CEDE	dbh	crown dia	meters	1/dbh^2	quad	1.06017	0.24149	-0.00075			1.28	18.68	0.001	26	0.963	1.7	20	23
SoCalC	Cedrus deodara	CEDE	dbh	crown ht	meters	1	loglogw1	0.46811	1.42625	0.08132			0.95	14.81	0.28517	26	0.704	2.7	20	24
SoCalC	Cedrus deodara	CEDE	age	dbh	centimeters	1/age^2	quad	0.92345	1.42681	0.01585			0.92	111.88	0.27082	27	0.905	2.5	125	24
SoCalC	Cedrus deodara	CEDE	dbh	leaf area	sq. meters	1/dbh^2	cub	11.9003	-0.022	0.17187	-0.00093		12.03	854.3	3.21682	21	0.87	12.5	900	17
SoCalC	Cedrus deodara	CEDE	dbh	tree ht	meters	1	loglogw1	0.43343	1.64844	0.05391			0.82	20.15	0.23218	26	0.829	2.7	25	24
SoCalC	Ceratonia siliqua	CESI3	dbh	age	years	1	cub	-5.52296	2.144	-0.036	0.00021		0	55	19.2978	29	0.822	0	50	25
SoCalC	Ceratonia siliqua	CESI3	cdia	dbh	meters	1/cdia^2	quad	0.84527	3.19166	0.20995			3.06	86.24	1.39382	29	0.929	2.5	90	26
SoCalC	Ceratonia siliqua	CESI3	dbh	crown dia	meters	1	loglogw1	-1.12431	2.46165	0.02272			0.59	13.03	0.15073	29	0.938	0.5	13	27
SoCalC	Ceratonia siliqua	CESI3	dbh	crown ht	meters	1	loglogw1	-1.27595	2.11902	0.10619			0.5	6.83	0.32587	29	0.705	0.4	9	27
SoCalC	Ceratonia siliqua	CESI3	age	dbh	centimeters	1/age^2	quad	2.53495	0.50529	0.01848			2.53	86.24	0.08917	30	0.93	2.5	90	27
SoCalC	Ceratonia siliqua	CESI3	dbh	leaf area	sq. meters	1/dbh	loglogw3	-2.17205	5.23053	0.00542			0.39	362.14	0.0736	29	0.979	0.4	493.6	27
SoCalC	Ceratonia siliqua	CESI3	dbh	tree ht	meters	1	loglogw1	-0.21866	1.74001	0.02071			1.22	10.92	0.14391	29	0.893	1.2	11.5	27
SoCalC	Cinnamomum camphora	CICA	dbh	age	years	1/sqrt(dbh)	lin	1.79341	0.64811				0	85	6.46355	29	0.865	0	70	27
SoCalC	Cinnamomum camphora	CICA	cdia	dbh	meters	1/cdia	loglogw3	1.17901	2.97972	0.00452			2.53	75	0.06723	29	0.971	2.5	90	27
SoCalC	Cinnamomum camphora	CICA	dbh	crown dia	meters	1/dbh^2	quad	0.82584	0.26812	-0.00117			1.5	16.16	0.00116	29	0.96	1.5	16.5	26
SoCalC	Cinnamomum camphora	CICA	dbh	crown ht	meters	1/sqrt(dbh)	loglogw2	-0.28267	1.55446	0.01352			1.09	9.16	0.11627	29	0.806	1	11	27
SoCalC	Cinnamomum camphora	CICA	age	dbh	centimeters	1/age^2	lin	2.52669	1.33056				2.53	115.62	0.12466	29	0.929	2.5	90	27
SoCalC	Cinnamomum camphora	CICA	dbh	leaf area	sq. meters	1	loglogw1	-1.07155	4.5587	0.23591			1.48	469.55	0.48571	29	0.854	1.3	413.6	27
SoCalC	Cinnamomum camphora	CICA	dbh	tree ht	meters	1/sqrt(dbh)	loglogw2	0.30887	1.48301	0.00397			1.93	14.07	0.06299	29	0.928	2	17.5	27
SoCalC	Cupaniopsis anacardioides	CUAN	dbh	age	years	1	loglogw1	-0.65356	3.15034	0.10758			0	75	0.32799	30	0.933	1	55	28
SoCalC	Cupaniopsis anacardioides	CUAN	cdia	dbh	meters	1	loglogw1	1.56811	2.36783	0.0564			1.3	55.64	0.23748	30	0.943	2.1	55	28
SoCalC	Cupaniopsis anacardioides	CUAN	dbh	crown dia	meters	1	loglogw1	-0.34737	1.92743	0.02662			0.51	10.47	0.16317	30	0.954	0.8	11	28
SoCalC	Cupaniopsis anacardioides	CUAN	dbh	crown ht	meters	1/sqrt(dbh)	lin	1.0575	0.11194				1.2	7.29	0.18952	30	0.799	0.5	8	28
SoCalC	Cupaniopsis anacardioides	CUAN	age	dbh	centimeters	1/age	quad	1.30481	1.3781	-0.00872			1.3	55.64	1.91633	31	0.902	2.1	55	28
SoCalC	Cupaniopsis anacardioides	CUAN	dbh	leaf area	sq. meters	1/dbh^2	quad	-0.03248	0.62085	0.07567			0.91	268.76	1.25704	29	0.829	0.3	250	26
SoCalC	Cupaniopsis anacardioides	CUAN	dbh	tree ht	meters	1/dbh	quad	2.19362	0.26965	-0.00226			2.54	10.19	0.0445	30	0.912	2.5	11	27
SoCalC	Eucalyptus ficifolia	EUFI81	dbh	age	years	1	cub	-4.72264	1.8489	-0.02853	0.00016		0	55	11.5666	31	0.851	0	55	27
SoCalC	Eucalyptus ficifolia	EUFI81	cdia	dbh	meters	1	loglogw1	1.8674	2.60813	0.03091			2.53	108.66	0.1758	31	0.924	2.5	100	29
SoCalC	Eucalyptus ficifolia	EUFI81	dbh	crown dia	meters	1/dbh^2	cub	0.27156	0.29607	-0.00392	2e-05		1	17.92	0.00047	31	0.973	1	15.5	27
SoCalC	Eucalyptus ficifolia	EUFI81	dbh	crown ht	meters	1/dbh^2	lin	1.00138	0.08194				1.21	9.9	0.00103	31	0.839	1.2	12	29
SoCalC	Eucalyptus ficifolia	EUFI81	age	dbh	centimeters	1/age^2	quad	2.53379	0.62042	0.0238			2.53	108.66	0.08889	32	0.96	2.5	100	29
SoCalC	Eucalyptus ficifolia	EUFI81	dbh	leaf area	sq. meters	1/dbh^2	cub	-11.4866	5.39173	-0.12114	0.00136		1.42	883.58	1.86697	31	0.849	1.6	840	27
SoCalC	Eucalyptus ficifolia	EUFI81	dbh	tree ht	meters	1/dbh^2	loglogw4	0.10924	1.54013	1e-05			1.6	12.96	0.00345	31	0.988	1.6	16.5	29
SoCalC	Ficus thonningii	FIMI	dbh	age	years	1	lin	-0.50677	0.69174				0	51	26.2467	31	0.82	0	55	29
SoCalC	Ficus thonningii	FIMI	cdia	dbh	meters	1/cdia	cub	-14.3494	15.6496	-1.57143	0.06766		2.5	79.95	4.75517	31	0.919	2.5	80	27
SoCalC	Ficus thonningii	FIMI	dbh	crown dia	meters	1/dbh^2	lin	0.77625	0.16301				1.18	13.81	0.00072	31	0.966	1.2	13.5	29
SoCalC	Ficus thonningii	FIMI	dbh	crown ht	meters	1	lin	0.9057	0.07078				1.08	6.56	0.98155	31	0.557	0.8	7	29
SoCalC	Ficus thonningii	FIMI	age	dbh	centimeters	1/age^2	cub	2.50388	3.61389	-0.12425	0.00163		2.5	79.95	0.042	33	0.979	2.5	80	29
SoCalC	Ficus thonningii	FIMI	dbh	leaf area	sq. meters	1	expow1	1.68974	0.05947	0.26925			7.19	719.63	0.51889	31	0.767	3.7	439.4	29
SoCalC	Ficus thonningii	FIMI	dbh	tree ht	meters	1/dbh^2	quad	0.94984	0.21877	-0.00104			1.49	11.8	0.0004	31	0.98	1.5	14.5	28
SoCalC	Jacaranda mimosifolia	JAMI	dbh	age	years	1	loglogw1	-1.26073	3.91538	0.10672			0	75	0.32668	32	0.937	1	70	30
SoCalC	Jacaranda mimosifolia	JAMI	cdia	dbh	meters	1/cdia^2	quad	-0.02436	2.45048	0.11015			2.68	61.31	0.46527	32	0.918	3	58	29
SoCalC	Jacaranda mimosifolia	JAMI	dbh	crown dia	meters	1/dbh	quad	0.48967	0.33701	-0.00199			1.38	13.66	0.04677	32	0.939	1.1	13.3	29
SoCalC	Jacaranda mimosifolia	JAMI	dbh	crown ht	meters	1/dbh	lin	0.75715	0.1252				1.09	8.43	0.05453	32	0.766	1	9	30
SoCalC	Jacaranda mimosifolia	JAMI	age	dbh	centimeters	1/age^2	lin	2.67791	0.78174				2.68	61.31	0.0529	32	0.892	3	58	30
SoCalC	Jacaranda mimosifolia	JAMI	dbh	leaf area	sq. meters	1	loglogw1	-1.56175	5.07775	0.73825			2.85	435.7	0.85921	32	0.783	0.6	519.5	30
SoCalC	Jacaranda mimosifolia	JAMI	dbh	tree ht	meters	1/dbh	lin	2.78424	0.16145				3.22	12.68	0.04647	32	0.865	3	13	30
SoCalC	Liquidambar styraciflua	LIST	dbh	age	years	1	loglogw1	-0.69616	3.3721	0.05649			1	100	0.23768	32	0.929	1	50	30
SoCalC	Liquidambar styraciflua	LIST	cdia	dbh	meters	1/sqrt(cdia)	loglogw2	1.49004	2.62412	0.01371			1.77	46.21	0.11711	32	0.955	2.2	54	30
SoCalC	Liquidambar styraciflua	LIST	dbh	crown dia	meters	1/dbh^2	quad	0.50662	0.29293	-0.00268			1.03	8.29	0.00102	32	0.962	1.1	9	29
SoCalC	Liquidambar styraciflua	LIST	dbh	crown ht	meters	1	expow1	0.90668	0.03156	0.04235			2.68	10.64	0.20579	32	0.739	2	12	30
SoCalC	Liquidambar styraciflua	LIST	age	dbh	centimeters	1	loglogw1	1.17646	1.72145	0.04807			1.83	45.52	0.21924	32	0.895	2.2	54	30
SoCalC	Liquidambar styraciflua	LIST	dbh	leaf area	sq. meters	1	expow1	1.85541	0.08417	0.64256			10.29	406.58	0.8016	32	0.567	2.4	260	30
SoCalC	Liquidambar styraciflua	LIST	dbh	tree ht	meters	1/dbh	quad	1.90501	0.39675	-0.00244			2.62	14.92	0.0483	32	0.947	3	17	29
SoCalC	Magnolia grandiflora	MAGR	dbh	age	years	1/dbh	cub	-4.80264	2.38852	-0.06062	0.00063		0	58	1.01026	32	0.912	0	65	28
SoCalC	Magnolia grandiflora	MAGR	cdia	dbh	meters	1/cdia^2	cub	2.3905	-0.47113	0.87631	-0.04325		2.54	55.89	0.73885	32	0.917	2.5	60	28
SoCalC	Magnolia grandiflora	MAGR	dbh	crown dia	meters	1	loglogw1	-0.57389	2.17574	0.02815			0.96	11.85	0.16779	32	0.928	0.8	13.9	30
SoCalC	Magnolia grandiflora	MAGR	dbh	crown ht	meters	1	quad	1.0879	0.1863	-0.00121			1.55	7.73	0.93003	33	0.775	1	9	30
SoCalC	Magnolia grandiflora	MAGR	age	dbh	centimeters	1/age^2	cub	2.53724	0.27511	0.03873	-0.00048		2.54	55.89	0.05599	28	0.931	2.5	60	24
SoCalC	Magnolia grandiflora	MAGR	dbh	leaf area	sq. meters	1	loglogw1	-1.67496	5.07172	0.4317			1.36	290.53	0.65704	30	0.823	0.9	526.4	28
SoCalC	Magnolia grandiflora	MAGR	dbh	tree ht	meters	1/dbh	quad	1.66249	0.29621	-0.00204			2.4	11.85	0.0349	32	0.932	1.8	13	29
SoCalC	Metrosideros excelsa	MEEX	dbh	age	years	1/sqrt(dbh)	quad	-3.29491	1.11772	-0.0055			0	55	4.9739	26	0.867	0	60	23
SoCalC	Metrosideros excelsa	MEEX	cdia	dbh	meters	1	quad	5.89474	1.68251	0.21433			2.52	85.16	17.2793	26	0.954	2.5	85	23
SoCalC	Metrosideros excelsa	MEEX	dbh	crown dia	meters	1	quad	0.13671	0.26448	-0.001			0.8	15.38	0.73346	26	0.944	1.3	15.2	23
SoCalC	Metrosideros excelsa	MEEX	dbh	crown ht	meters	1/dbh^2	lin	0.46231	0.13463				0.8	11.93	0.00152	26	0.876	0.8	12	24
SoCalC	Metrosideros excelsa	MEEX	age	dbh	centimeters	1/age^2	cub	2.52273	1.72789	-0.04419	0.00073		2.52	85.16	0.08265	28	0.938	2.5	85	24
SoCalC	Metrosideros excelsa	MEEX	dbh	leaf area	sq. meters	1/dbh^2	quad	-1.94891	1.56473	0.02489			2.16	311.78	0.79878	29	0.856	3.1	490	26
SoCalC	Metrosideros excelsa	MEEX	dbh	tree ht	meters	1/sqrt(dbh)	loglogw2	-0.21955	1.88185	0.00401			1.24	13.61	0.06331	26	0.951	1.3	16	24
SoCalC	Melaleuca quinquenervia	MEQU	dbh	age	years	1/dbh^2	cub	-3.88236	1.61326	-0.03226	0.00025		0	45	0.00533	29	0.985	0	50	25
SoCalC	Melaleuca quinquenervia	MEQU	cdia	dbh	meters	1/cdia^2	cub	-16.0278	20.2722	-3.3124	0.2268		2.53	81.79	0.8722	29	0.947	2.5	80	25
SoCalC	Melaleuca quinquenervia	MEQU	dbh	crown dia	meters	1/dbh^2	quad	0.66969	0.16919	-0.00064			1.09	10.22	0.00051	29	0.964	1.1	10	26
SoCalC	Melaleuca quinquenervia	MEQU	dbh	crown ht	meters	1/sqrt(dbh)	lin	0.22416	0.12528				0.54	10.47	0.2955	29	0.722	0.9	9.5	27
SoCalC	Melaleuca quinquenervia	MEQU	age	dbh	centimeters	1/age^2	quad	2.52993	1.00644	0.01677			2.53	81.79	0.07054	30	0.963	2.5	80	27
SoCalC	Melaleuca quinquenervia	MEQU	dbh	leaf area	sq. meters	1/dbh^2	quad	-1.94891	1.56473	0.02489			2.17	292.48	0.79878	29	0.857	2.2	314.1	26
SoCalC	Melaleuca quinquenervia	MEQU	dbh	tree ht	meters	1/sqrt(dbh)	loglogw2	-0.00309	1.73737	0.00204			1.49	13.29	0.04522	29	0.969	1.5	13	27
SoCalC	Phoenix canariensis	PHCA	dbh	crown dia	meters	1/sqrt(ht)	quad	0.807	1.028	-0.00301			1.35	14.35				6.3	9.8
SoCalC	Phoenix canariensis	PHCA	dbh	crown ht	meters	1/ht	quad	-0.205	0.897	-0.0212			0.65	8.11				2	10
SoCalC	Phoenix canariensis	PHCA	dbh	leaf area	sq. meters	1/ht	cub	-12.237	14.0084	0.4132	-0.0292		1.76	182.39				54.4	318.5
SoCalC	Phoenix canariensis	PHCA	dbh	tree ht	meters	1/age	quad	-0.365	0.453	-0.00235			0.09	21.47				7.5	22
SoCalC	Pinus canariensis	PICA	dbh	age	years	1	loglogw1	-0.95778	3.14871	0.06792			1	100	0.26062	27	0.922	1	39	25
SoCalC	Pinus canariensis	PICA	cdia	dbh	meters	1/cdia^2	quad	-10.442	10.6847	-0.3232			2.85	90.35	1.0168	27	0.959	2.8	81.4	24
SoCalC	Pinus canariensis	PICA	dbh	crown dia	meters	1/dbh^2	lin	0.905	0.13747				1.3	13.34	0.02852	27	0.955	1.3	13.4	25
SoCalC	Pinus canariensis	PICA	dbh	crown ht	meters	1/dbh	loglogw3	0.43083	1.62852	0.00099			2.51	18.74	0.03146	27	0.969	2.5	23	25
SoCalC	Pinus canariensis	PICA	age	dbh	centimeters	1/age	loglogw3	1.71521	1.8228	0.00156			2.85	90.44	0.03953	27	0.991	2.8	81.4	25
SoCalC	Pinus canariensis	PICA	dbh	leaf area	sq. meters	1/dbh^2	quad	5.46829	-0.80222	0.13932			4.31	1072.43	5.05681	25	0.892	3.8	897.3	22
SoCalC	Pinus canariensis	PICA	dbh	tree ht	meters	1/dbh	loglogw3	0.59695	1.6787	0.00069			3	23.54	0.02619	27	0.98	3	27	25
SoCalC	Pittosporum undulatum	PIUN	dbh	age	years	1	cub	0.47477	0.32538	-0.00422	3e-05		0	50	7.24403	34	0.893	0	55	30
SoCalC	Pittosporum undulatum	PIUN	cdia	dbh	meters	1	loglogw1	1.54223	2.75869	0.04688			2.54	81.89	0.21651	34	0.868	2.5	81	32
SoCalC	Pittosporum undulatum	PIUN	dbh	crown dia	meters	1/dbh	loglogw3	-0.24495	1.80527	0.00051			1.19	11.68	0.02254	34	0.983	1.2	14.7	32
SoCalC	Pittosporum undulatum	PIUN	dbh	crown ht	meters	1/dbh	loglogw3	-0.37094	1.56999	0.00155			1	7.58	0.03938	34	0.933	1	11	32
SoCalC	Pittosporum undulatum	PIUN	age	dbh	centimeters	1/age^2	quad	2.53813	0.18654	0.02801			2.54	81.89	0.06077	34	0.958	2.5	81	31
SoCalC	Pittosporum undulatum	PIUN	dbh	leaf area	sq. meters	1/dbh	loglogw3	0.68646	3.2596	0.00847			4.31	356.25	0.09202	34	0.921	4.4	833.4	32
SoCalC	Pittosporum undulatum	PIUN	dbh	tree ht	meters	1/sqrt(dbh)	loglogw2	0.03438	1.65428	0.00365			1.53	12.29	0.06044	34	0.938	1.5	15	32
SoCalC	Podocarpus macrophyllus	POMA	dbh	age	years	1	cub	-18.2018	6.42518	-0.2771	0.00433		0	60	16.1202	30	0.878	0	50	26
SoCalC	Podocarpus macrophyllus	POMA	cdia	dbh	meters	1	loglogw1	1.83556	2.17704	0.04652			2.54	36.84	0.21568	30	0.87	2.5	33	28
SoCalC	Podocarpus macrophyllus	POMA	dbh	crown dia	meters	1/dbh^2	loglogw4	-0.46356	1.79746	8e-05			0.96	6.76	0.00902	30	0.977	1	8	28
SoCalC	Podocarpus macrophyllus	POMA	dbh	crown ht	meters	1/dbh^2	lin	0.54411	0.1832				1.01	7.29	0.00321	30	0.849	0.9	7.5	28
SoCalC	Podocarpus macrophyllus	POMA	age	dbh	centimeters	1/age	lin	2.53994	0.57161				2.54	36.84	0.40155	30	0.963	2.5	33	28
SoCalC	Podocarpus macrophyllus	POMA	dbh	leaf area	sq. meters	1/dbh	loglogw3	-0.27459	3.60399	0.01251			1.8	100.03	0.11185	28	0.916	1.9	137.2	26
SoCalC	Podocarpus macrophyllus	POMA	dbh	tree ht	meters	1	loglogw1	0.11955	1.57212	0.02202			1.65	8.61	0.14838	30	0.858	1.8	9.5	28
SoCalC	Prunus caroliniana	PRCA	dbh	age	years	1	cub	-12.5472	4.45035	-0.12662	0.0012		0	40	21.6472	31	0.693	0	44	27
SoCalC	Prunus caroliniana	PRCA	cdia	dbh	meters	1/cdia	loglogw3	1.98281	1.97051	0.00524			2.53	30.2	0.07237	31	0.972	2.5	49.9	29
SoCalC	Prunus caroliniana	PRCA	dbh	crown dia	meters	1/dbh	loglogw3	-0.72711	2.13161	0.00093			0.79	6.83	0.03043	31	0.977	0.8	9.6	29
SoCalC	Prunus caroliniana	PRCA	dbh	crown ht	meters	1/dbh^2	lin	1.28462	0.08935				1.51	3.99	0.03578	31	0.793	1.5	7	29
SoCalC	Prunus caroliniana	PRCA	age	dbh	centimeters	1/age^2	quad	2.52668	1.33198	-0.01598			2.53	30.24	0.17245	31	0.941	2.5	49.9	28
SoCalC	Prunus caroliniana	PRCA	dbh	leaf area	sq. meters	1/dbh^2	loglogw4	0.1523	3.33703	0.00027			2.52	81.48	0.01645	31	0.974	2.6	334.9	29
SoCalC	Prunus caroliniana	PRCA	dbh	tree ht	meters	1/dbh^2	loglogw4	0.42175	1.15657	3e-05			1.99	6.44	0.00506	31	0.98	2	9.5	29
SoCalC	Schinus terebinthifolius	SCTE	dbh	age	years	1/sqrt(dbh)	quad	-6.59353	1.6612	-0.01388			0	47	10.6403	30	0.752	0	60	27
SoCalC	Schinus terebinthifolius	SCTE	cdia	dbh	meters	1/cdia	lin	-0.8931	5.10286				2.52	46.48	8.41181	30	0.87	2.5	70	28
SoCalC	Schinus terebinthifolius	SCTE	dbh	crown dia	meters	1/sqrt(dbh)	loglogw2	-0.8683	2.26674	0.00454			0.71	9.11	0.06735	30	0.96	0.7	12	28
SoCalC	Schinus terebinthifolius	SCTE	dbh	crown ht	meters	1/sqrt(dbh)	loglogw2	-0.6117	1.6027	0.01706			0.8	5.01	0.13062	30	0.761	0.8	7.5	28
SoCalC	Schinus terebinthifolius	SCTE	age	dbh	centimeters	1/age^2	quad	2.52131	1.8692	-0.01987			2.52	46.48	0.0814	31	0.939	2.5	70	28
SoCalC	Schinus terebinthifolius	SCTE	dbh	leaf area	sq. meters	1	loglogw1	-1.31868	4.54149	0.41033			1.51	156.18	0.64057	30	0.689	1.3	385.7	28
SoCalC	Schinus terebinthifolius	SCTE	dbh	tree ht	meters	1	loglogw1	-0.07242	1.61063	0.0261			1.37	8.24	0.16156	30	0.816	1.5	11	28
SoCalC	Tristaniopsis conferta	TRCO	dbh	age	years	1/dbh	lin	-2.17126	1.20153				0	50	1.92538	28	0.838	1	50	26
SoCalC	Tristaniopsis conferta	TRCO	cdia	dbh	meters	1/sqrt(cdia)	lin	0.45006	3.82706				4.68	39.57	3.42887	28	0.924	3.1	36	26
SoCalC	Tristaniopsis conferta	TRCO	dbh	crown dia	meters	1/dbh	lin	0.28926	0.24112				1.42	9.83	0.02544	28	0.941	1.2	9.1	26
SoCalC	Tristaniopsis conferta	TRCO	dbh	crown ht	meters	1/dbh^2	lin	0.42798	0.17059				1.23	7.18	0.00444	28	0.757	1	7.5	26
SoCalC	Tristaniopsis conferta	TRCO	age	dbh	centimeters	1/sqrt(age)	lin	4.67682	0.69794				4.68	39.57	4.85478	28	0.823	3.1	36	26
SoCalC	Tristaniopsis conferta	TRCO	dbh	leaf area	sq. meters	1/sqrt(dbh)	expow2	-0.41974	0.16619	0.22894			1.83	525.71	0.47848	27	0.745	0.7	182	25
SoCalC	Tristaniopsis conferta	TRCO	dbh	tree ht	meters	1/dbh^2	lin	2.84622	0.21732				3.86	11.45	0.00278	28	0.891	3.5	11.5	26
SoCalC	Washingtonia robusta	WARO	dbh	crown dia	meters	1/ht	quad	0.09678	0.411	-0.00834			0.35	5.12				2.5	5.9
SoCalC	Washingtonia robusta	WARO	dbh	crown ht	meters	1/ht	quad	0.115	0.433	-0.0094			0.38	5.1				1.5	5
SoCalC	Washingtonia robusta	WARO	dbh	leaf area	sq. meters	1/ht	cub	0.116	0.09026	0.22	-0.00547		0.26	51.04				0.9	27.9
SoCalC	Washingtonia robusta	WARO	dbh	tree ht	meters	1/age	quart	-0.163	0.783	0.00079	-0.00015	9.06e-07	0.62	30.53				8	30
SWDsrt	Acacia farnesiana	ACFA	dbh	age	years	1/dbh^2	quad	-3.79069	1.65519	-0.0258			0	40	0.16512	31	0.719	0	34	28
SWDsrt	Acacia farnesiana	ACFA	cdia	dbh	meters	1	loglogw1	0.89111	3.12679	0.08782			2.53	30	0.29634	31	0.837	2.5	42.6	29
SWDsrt	Acacia farnesiana	ACFA	dbh	crown dia	meters	1/sqrt(dbh)	quad	1.42229	0.28103	-0.00252			2.12	9.05	0.17286	31	0.842	1.8	9.5	28
SWDsrt	Acacia farnesiana	ACFA	dbh	crown ht	meters	1/sqrt(dbh)	lin	1.72528	0.09894				1.98	6.34	0.2359	31	0.519	1.2	6.2	29
SWDsrt	Acacia farnesiana	ACFA	age	dbh	centimeters	1/age^2	lin	2.52897	1.10273				2.53	46.64	0.31569	31	0.781	2.5	42.6	29
SWDsrt	Acacia farnesiana	ACFA	dbh	leaf area	sq. meters	1/dbh^2	lin	-5.68146	3.02232				1.96	135.27	1.5013	28	0.728	3	184	26
SWDsrt	Acacia farnesiana	ACFA	dbh	tree ht	meters	1/sqrt(dbh)	lin	2.43046	0.17496				2.87	10.59	0.3206	31	0.716	1.5	10.3	29
SWDsrt	Acacia salicina	ACSA3	dbh	age	years	1/dbh	quad	-2.45632	1.00049	-0.01094			0	40	1.349	37	0.608	0	32	34
SWDsrt	Acacia salicina	ACSA3	cdia	dbh	meters	1/cdia	lin	-1.55496	4.11895				2.52	55	2.89381	37	0.904	2.5	58	35
SWDsrt	Acacia salicina	ACSA3	dbh	crown dia	meters	1/dbh^2	lin	0.87202	0.22227				1.43	14.98	0.00175	37	0.932	1.5	13.7	35
SWDsrt	Acacia salicina	ACSA3	dbh	crown ht	meters	1/dbh	lin	0.7927	0.23197				1.38	15.52	0.11496	37	0.801	0.3	13.8	35
SWDsrt	Acacia salicina	ACSA3	age	dbh	centimeters	1/age^2	lin	2.52259	1.74138				2.52	63.47	0.53673	37	0.841	2.5	58	35
SWDsrt	Acacia salicina	ACSA3	dbh	leaf area	sq. meters	1/dbh^2	quad	1.81849	-0.11212	0.17898			2.67	715.73	2.98173	36	0.874	1.9	624.5	33
SWDsrt	Acacia salicina	ACSA3	dbh	tree ht	meters	1	loglogw1	-0.20326	2.03912	0.03286			1.34	15.1	0.18128	37	0.861	1.5	16.3	35
SWDsrt	Brachychiton populneum	BRPO	dbh	age	years	1/dbh^2	lin	-2.93366	1.17723				0	95	0.29572	35	0.69	0	91	33
SWDsrt	Brachychiton populneum	BRPO	cdia	dbh	meters	1/sqrt(cdia)	lin	-0.28616	4.92625				2.52	68.4	6.97696	35	0.932	2.5	65.7	33
SWDsrt	Brachychiton populneum	BRPO	dbh	crown dia	meters	1/dbh^2	lin	0.5051	0.18184				0.96	12.94	0.00121	35	0.929	1	14	33
SWDsrt	Brachychiton populneum	BRPO	dbh	crown ht	meters	1/dbh	quad	0.61354	0.26392	-0.0017			1.27	10.71	0.08964	35	0.777	1	13.2	32
SWDsrt	Brachychiton populneum	BRPO	age	dbh	centimeters	1/age^2	cub	2.52375	1.62224	-0.03307	0.00025		2.52	68.4	0.16353	35	0.873	2.5	65.7	31
SWDsrt	Brachychiton populneum	BRPO	dbh	leaf area	sq. meters	1	loglogw1	-2.23553	5.55072	0.45783			0.97	434.64	0.67663	35	0.816	0.8	598.9	33
[truncated: 403 more rows]

## Sheet: TS6_Growth_coefficients (2)
Region	Scientific Name	SpCode	Independent variable	Predicts component	Units of predicted components	Model weight	EqName	a	b	c or mse	d	e	Apps min	Apps max	Sigma	n	adj R2	Data min (from raw data)	Data max (from raw data)	DF	10	20	30	40	50	60	70	80	90	100	110	120	130	140	150
SWDsrt	Acacia farnesiana	ACFA	dbh	age	years	1/dbh^2	quad	-3.79069	1.65519	-0.0258			0	40	0.16512	31	0.719	0	34	28
SWDsrt	Acacia farnesiana	ACFA	dbh	crown dia	meters	1/sqrt(dbh)	quad	1.42229	0.28103	-0.00252			2.12	9.05	0.17286	31	0.842	1.8	9.5	28
SWDsrt	Acacia farnesiana	ACFA	dbh	crown ht	meters	1/sqrt(dbh)	lin	1.72528	0.09894				1.98	6.34	0.2359	31	0.519	1.2	6.2	29
SWDsrt	Acacia farnesiana	ACFA	cdia	dbh	meters	1	loglogw1	0.89111	3.12679	0.08782			2.53	30	0.29634	31	0.837	2.5	42.6	29
SWDsrt	Acacia farnesiana	ACFA	age	dbh	centimeters	1/age^2	lin	2.52897	1.10273				2.53	46.64	0.31569	31	0.781	2.5	42.6	29
SWDsrt	Acacia farnesiana	ACFA	dbh	leaf area	sq. meters	1/dbh^2	lin	-5.68146	3.02232				1.96	135.27	1.5013	28	0.728	3	184	26
SWDsrt	Acacia farnesiana	ACFA	dbh	tree ht	meters	1/sqrt(dbh)	lin	2.43046	0.17496				2.87	10.59	0.3206	31	0.716	1.5	10.3	29
NoCalC	Acacia melanoxylon	ACME	dbh	age	years	1/dbh	quad	-0.07717	1.03847	-0.00387			1	74	1.13403	35	0.941	0	80	32
NoCalC	Acacia melanoxylon	ACME	dbh	crown dia	meters	1/sqrt(dbh)	quad	0.72517	0.23255	-0.00072			1.37	16.71	0.31444	31	0.941	0.3	20.7	28
NoCalC	Acacia melanoxylon	ACME	dbh	crown ht	meters	1/sqrt(dbh)	loglogw2	0.33845	1.43614	0.01374			2.14	13.47	0.1172	31	0.911	1.2	23.1	29
NoCalC	Acacia melanoxylon	ACME	cdia	dbh	meters	1/cdia^2	quad	0.48486	2.88322	0.17048			2.78	99.02	1.28772	31	0.927	1.5	130.9	28
NoCalC	Acacia melanoxylon	ACME	age	dbh	centimeters	1/age^2	cub	2.85114	-0.12224	0.05596	-0.0005		2.78	99.03	0.11337	35	0.907	1.5	130.9	31
NoCalC	Acacia melanoxylon	ACME	dbh	leaf area	sq. meters	1	loglogw1	0.38175	3.72792	0.30567			6.38	491.2	0.55287	25	0.895	2	759.3	23
NoCalC	Acacia melanoxylon	ACME	dbh	tree ht	meters	1/sqrt(dbh)	loglogw2	0.50713	1.54757	0.00894			2.6	18.45	0.09454	31	0.948	1.4	29.4	29
SWDsrt	Acacia salicina	ACSA3	dbh	age	years	1/dbh	quad	-2.45632	1.00049	-0.01094			0	40	1.349	37	0.608	0	32	34
SWDsrt	Acacia salicina	ACSA3	dbh	crown dia	meters	1/dbh^2	lin	0.87202	0.22227				1.43	14.98	0.00175	37	0.932	1.5	13.7	35
SWDsrt	Acacia salicina	ACSA3	dbh	crown ht	meters	1/dbh	lin	0.7927	0.23197				1.38	15.52	0.11496	37	0.801	0.3	13.8	35
SWDsrt	Acacia salicina	ACSA3	cdia	dbh	meters	1/cdia	lin	-1.55496	4.11895				2.52	55	2.89381	37	0.904	2.5	58	35
SWDsrt	Acacia salicina	ACSA3	age	dbh	centimeters	1/age^2	lin	2.52259	1.74138				2.52	63.47	0.53673	37	0.841	2.5	58	35
SWDsrt	Acacia salicina	ACSA3	dbh	leaf area	sq. meters	1/dbh^2	quad	1.81849	-0.11212	0.17898			2.67	715.73	2.98173	36	0.874	1.9	624.5	33
SWDsrt	Acacia salicina	ACSA3	dbh	tree ht	meters	1	loglogw1	-0.20326	2.03912	0.03286			1.34	15.1	0.18128	37	0.861	1.5	16.3	35
PacfNW	Acer macrophyllum	ACMA	dbh	age	years	1/dbh	quad	0.57316	0.51132	0.00191			1	150	0.63305	40	0.976	1	150	37
PacfNW	Acer macrophyllum	ACMA	dbh	crown dia	meters	1/dbh	quad	0.39369	0.24616	-0.00081			0.82	19.1	0.05823	40	0.963	0.4	21.6	37
PacfNW	Acer macrophyllum	ACMA	dbh	crown ht	meters	1	loglogw1	0.28858	1.74158	0.03472			1.4	23.44	0.18633	40	0.956	1	27	38
PacfNW	Acer macrophyllum	ACMA	cdia	dbh	meters	1/cdia^2	cub	0.2992	1.76512	0.55846	-0.01836		1.75	174.33	1.86099	40	0.925	1.3	174	36
PacfNW	Acer macrophyllum	ACMA	age	dbh	centimeters	1/sqrt(age)	cub	-0.21317	1.97429	-0.01051	3e-05		1.75	174.33	9.62084	40	0.976	1.3	174	36
PacfNW	Acer macrophyllum	ACMA	dbh	leaf area	sq. meters	1	loglogw1	-1.54932	5.67086	0.32352			0.53	2764.92	0.56879	35	0.965	0	2256.2	33
PacfNW	Acer macrophyllum	ACMA	dbh	tree ht	meters	1	loglogw1	0.85132	1.48977	0.02171			2.42	27.14	0.14735	40	0.963	1.5	30.5	38
MidWst	Acer negundo	ACNE	dbh	age	years	1/dbh^2	cub	-2.97492	0.78209	-0.00992	7e-05		1	40	0.00336	42	0.97	0	40	38
MidWst	Acer negundo	ACNE	dbh	crown dia	meters	1/dbh	loglogw3	-0.11047	1.80298	0.00065			2.25	13.85	0.02548	42	0.942	2.2	15.9	40
MidWst	Acer negundo	ACNE	dbh	crown ht	meters	1	loglogw1	0.67485	1.27142	0.05504			3.83	13.38	0.23461	41	0.495	3.2	16	39
MidWst	Acer negundo	ACNE	cdia	dbh	meters	1	loglogw1	0.80635	3.38779	0.05884			4.31	88.65	0.24256	42	0.83	4.3	92.5	40
MidWst	Acer negundo	ACNE	age	dbh	centimeters	1/age	lin	4.2805	2.10929				4.28	88.65	2.61565	42	0.966	4.3	92.5	40
MidWst	Acer negundo	ACNE	dbh	leaf area	sq. meters	1	loglogw1	-2.52725	5.90164	0.58343			4.18	824.64	0.76382	39	0.549	3.1	906.7	37
MidWst	Acer negundo	ACNE	dbh	tree ht	meters	1	cub	1.74178	0.71565	-0.01319	8e-05		4.57	18.74	4.66048	41	0.538	5	19.5	37
NoCalC	Acer palmatum	ACPA	dbh	age	years	1/dbh	cub	-2.14827	1.39244	0.00738	-0.00021		0	64	0.70595	38	0.97	0	63	34
NoCalC	Acer palmatum	ACPA	dbh	crown dia	meters	1	loglogw1	-1.01932	2.48188	0.03998			0.78	10.57	0.19994	35	0.928	0.7	14.5	33
NoCalC	Acer palmatum	ACPA	dbh	crown ht	meters	1/dbh	lin	0.90353	0.11475				1.23	6.34	0.05462	35	0.771	0.9	8.3	33
NoCalC	Acer palmatum	ACPA	cdia	dbh	meters	1/cdia^2	lin	-0.767	4.15225				2.85	47.38	0.67011	35	0.931	2.5	71.1	33
NoCalC	Acer palmatum	ACPA	age	dbh	centimeters	1/age^2	cub	2.84767	0.23083	0.02511	-0.00028		2.85	47.39	0.02437	38	0.944	2.5	71.1	34
NoCalC	Acer palmatum	ACPA	dbh	leaf area	sq. meters	1	loglogw1	-2.21556	5.79413	0.37159			1.3	368.78	0.60958	33	0.888	0.5	674.3	31
NoCalC	Acer palmatum	ACPA	dbh	tree ht	meters	1/sqrt(dbh)	lin	2.02054	0.15818				2.47	9.52	0.36403	35	0.819	1.9	12	33
LoMidW	Acer platanoides	ACPL	dbh	age	years	1/dbh^2	loglogw4	0.90737	2.04434	4e-05			1	85	0.00654	13	0.987	4	102	11
LoMidW	Acer platanoides	ACPL	dbh	crown dia	meters	1/dbh	loglogw3	-0.65567	2.2607	0.00062			0.22	17.26	0.02488	34	0.964	1.8	19.9	32
LoMidW	Acer platanoides	ACPL	dbh	crown ht	meters	1/dbh^2	quad	0.99499	0.25671	-0.00088			1.25	18.15	0.00209	33	0.909	2	21.5	30
LoMidW	Acer platanoides	ACPL	cdia	dbh	meters	1	loglogw1	1.12433	3.00884	0.0604			1.27	103.07	0.24577	34	0.872	4.8	98.6	32
LoMidW	Acer platanoides	ACPL	age	dbh	centimeters	1/age	cub	0.98208	0.25006	0.03658	-0.0003		0.98	103.07	0.48365	13	0.979	4.8	98.6	9
LoMidW	Acer platanoides	ACPL	dbh	leaf area	sq. meters	1	loglogw1	-2.02348	5.95869	0.21884			0.08	1391.58	0.4678	32	0.877	3.2	1049.5	30
LoMidW	Acer platanoides	ACPL	dbh	tree ht	meters	1/dbh^2	quad	2.2278	0.28294	-0.00108			2.5	19.92	0.00245	34	0.907	3.5	23.5	31
MidWst	Acer platanoides	ACPL	dbh	age	years	1/dbh	quad	1.81099	0.32363	0.00337			3	50	0.11763	48	0.967	2	44	45
MidWst	Acer platanoides	ACPL	dbh	crown dia	meters	1	loglogw1	-0.87092	2.44034	0.02608			0.81	16.97	0.16151	46	0.929	1.7	14.4	44
MidWst	Acer platanoides	ACPL	dbh	crown ht	meters	1	loglogw1	-0.51719	2.09545	0.03722			1.06	14.36	0.19292	46	0.872	1.3	13.5	44
MidWst	Acer platanoides	ACPL	cdia	dbh	meters	1/cdia^2	quad	-0.11612	2.86894	0.09215			2.66	60	0.53226	46	0.912	4.6	77.5	43
MidWst	Acer platanoides	ACPL	age	dbh	centimeters	1	cub	-7.94613	3.80588	-0.09314	0.00115		2.66	93.26	8.91825	48	0.973	4.6	77.5	44
MidWst	Acer platanoides	ACPL	dbh	leaf area	sq. meters	1	loglogw1	-5.73301	8.28918	0.32741			1.46	1226.83	0.5722	47	0.923	0.2	444.7	45
MidWst	Acer platanoides	ACPL	dbh	tree ht	meters	1	loglogw1	0.22989	1.78058	0.01837			2.03	18.72	0.13555	47	0.908	3	19	45
NMtnPr	Acer platanoides	ACPL	dbh	age	years	1/dbh^2	lin	-2.53308	0.94559				1	120	0.04556	60	0.929	0	88	58
NMtnPr	Acer platanoides	ACPL	dbh	crown dia	meters	1/dbh	cub	-0.58987	0.53395	-0.00791	5e-05		0.86	18.62	0.04449	59	0.94	1.5	19.9	55
NMtnPr	Acer platanoides	ACPL	dbh	crown ht	meters	1/sqrt(dbh)	quad	2.34685	0.24872	-0.00102			3.04	16.64	0.74096	59	0.683	2.5	19.5	56
NMtnPr	Acer platanoides	ACPL	cdia	dbh	meters	1/cdia	quad	-0.88817	2.92155	0.10277			4.15	92.73	7.29524	59	0.889	2.9	103.1	56
NMtnPr	Acer platanoides	ACPL	age	dbh	centimeters	1/age^2	quad	2.83678	1.31988	-0.00476			2.84	92.73	0.07659	60	0.94	2.9	103.1	57
NMtnPr	Acer platanoides	ACPL	dbh	leaf area	sq. meters	1/dbh^2	quad	-24.9183	6.40701	0.08505			3.15	1300.56	10.4284	59	0.88	5.7	1849.9	56
NMtnPr	Acer platanoides	ACPL	dbh	tree ht	meters	1	loglogw1	0.41126	1.6406	0.02514			2.49	18.14	0.15854	59	0.81	4	22	57
NoEast	Acer platanoides	ACPL	dbh	age	years	1/sqrt(dbh)	cub	2.75443	0.28615	0.01875	-0.00013		0	119	6.8775	48	0.908	2	85	44
NoEast	Acer platanoides	ACPL	dbh	crown dia	meters	1/dbh^2	quad	1.05784	0.25365	-0.00083			2.46	19.19	0.0019	42	0.921	2	22.1	39
NoEast	Acer platanoides	ACPL	dbh	crown ht	meters	1/dbh^2	quad	2.1127	0.09666	0.00067			2.68	21.99	0.00239	42	0.821	2.5	21	39
NoEast	Acer platanoides	ACPL	cdia	dbh	meters	1	loglogw1	1.17148	2.99617	0.06062			5.62	114.66	0.24621	42	0.914	2.7	120.7	40
NoEast	Acer platanoides	ACPL	age	dbh	centimeters	1	lin	5.61705	0.91636				5.62	114.66	36.4112	48	0.91	2.7	120.7	46
NoEast	Acer platanoides	ACPL	dbh	leaf area	sq. meters	1/sqrt(dbh)	loglogw2	-0.55184	4.27852	0.07518			9.58	677.12	0.27419	31	0.824	3.1	814.1	29
NoEast	Acer platanoides	ACPL	dbh	tree ht	meters	1/dbh^2	lin	3.16827	0.19507				4.26	25.54	0.00289	42	0.882	3.9	25	40
PacfNW	Acer platanoides	ACPL	dbh	age	years	1/dbh^2	cub	0.69436	0.34048	0.00733	-4e-05		1	94	0.01115	74	0.967	1	81	70
PacfNW	Acer platanoides	ACPL	dbh	crown dia	meters	1/dbh	cub	0.0926	0.36724	-0.00266	1e-05		0.66	23.43	0.00357	74	0.969	0.3	23.5	70
PacfNW	Acer platanoides	ACPL	dbh	crown ht	meters	1/dbh	quad	1.83357	0.23724	-0.00089			2.2	17.59	0.07359	74	0.94	2	21	71
PacfNW	Acer platanoides	ACPL	cdia	dbh	meters	1/cdia^2	cub	0.75329	1.40261	0.35382	-0.00942		1.56	100	0.76623	74	0.955	1.1	129.4	70
PacfNW	Acer platanoides	ACPL	age	dbh	centimeters	1/age	cub	-0.85211	2.4427	-0.02993	0.00022		1.56	146.78	1.40413	74	0.977	1.1	129.4	70
PacfNW	Acer platanoides	ACPL	dbh	leaf area	sq. meters	1	loglogw1	-0.65552	5.15935	0.25353			0.73	2251.37	0.50352	63	0.944	0.1	2387.2	61
PacfNW	Acer platanoides	ACPL	dbh	tree ht	meters	1/sqrt(dbh)	quad	2.56416	0.3118	-0.00127			3.05	21.68	0.50194	74	0.942	2	26	71
TpIntW	Acer platanoides	ACPL	dbh	age	years	1/dbh^2	quad	-0.47726	0.55454	0.0064			0	80	0.04587	62	0.903	1	105	59
TpIntW	Acer platanoides	ACPL	dbh	crown dia	meters	1/sqrt(dbh)	cub	-0.48779	0.46878	-0.00623	4e-05		1.47	16.89	0.31392	62	0.922	1.8	20.9	58
TpIntW	Acer platanoides	ACPL	dbh	crown ht	meters	1/dbh	quad	2.19541	0.24309	-0.00094			3.25	15.55	0.13374	62	0.789	2.5	24.5	59
TpIntW	Acer platanoides	ACPL	cdia	dbh	meters	1/cdia^2	quad	0.91777	2.59085	0.10624			4.42	79.42	0.57502	62	0.924	5.3	95	59
TpIntW	Acer platanoides	ACPL	age	dbh	centimeters	1/age	cub	4.41828	1.08423	0.00805	-0.00012		4.42	79.42	0.80746	62	0.965	5.3	95	58
TpIntW	Acer platanoides	ACPL	dbh	leaf area	sq. meters	1	loglogw1	-1.39952	5.35073	0.20615			5.61	762.74	0.45404	57	0.868	6.2	1479.6	55
TpIntW	Acer platanoides	ACPL	dbh	tree ht	meters	1/dbh	quad	3.46278	0.27395	-0.00101			4.65	18.87	0.13489	62	0.831	4	27	59
CenFla	Acer rubrum	ACRU	dbh	age	years	1/dbh	lin	1.51618	0.41447				2	65	0.42975	54	0.876	2	48	52
CenFla	Acer rubrum	ACRU	dbh	crown dia	meters	1/dbh	quad	0.72545	0.2537	-0.00123			1.31	13.75	0.04139	54	0.91	2.5	15.8	51
CenFla	Acer rubrum	ACRU	dbh	crown ht	meters	1/dbh	lin	2.73019	0.1214				3.01	14.46	0.14542	54	0.641	1	17	52
CenFla	Acer rubrum	ACRU	cdia	dbh	meters	1	loglogw1	1.3118	3.00257	0.04744			2.34	96.61	0.21781	54	0.894	5.1	94.5	52
CenFla	Acer rubrum	ACRU	age	dbh	centimeters	1/sqrt(age)	quad	-3.6811	3.0548	-0.02326			2.34	96.61	22.6792	54	0.847	5.1	94.5	51
CenFla	Acer rubrum	ACRU	dbh	leaf area	sq. meters	1/dbh	quad	-8.35263	4.42208	0.03036			2.14	702.22	278.917	54	0.748	10.3	825.5	51
CenFla	Acer rubrum	ACRU	dbh	tree ht	meters	1/sqrt(dbh)	quad	2.15761	0.29592	-0.00158			2.84	16.03	0.78841	54	0.762	2.5	21.5	51
GulfCo	Acer rubrum	ACRU	dbh	age	years	1/dbh^2	cub	-2.86707	1.34968	-0.03824	0.0004		1	38	0.03047	36	0.84	0	40	32
GulfCo	Acer rubrum	ACRU	dbh	crown dia	meters	1	loglogw1	-0.95104	2.50944	0.03775			0.72	14.9	0.19429	36	0.914	0.6	15.9	34
GulfCo	Acer rubrum	ACRU	dbh	crown ht	meters	1	loglogw1	-0.38867	2.17532	0.0546			1.18	16.15	0.23367	36	0.847	0.8	15	34
GulfCo	Acer rubrum	ACRU	cdia	dbh	meters	1/cdia^2	quad	1.34377	2.24225	0.13183			4.31	70.34	0.56985	36	0.922	2.5	68.6	33
GulfCo	Acer rubrum	ACRU	age	dbh	centimeters	1/age	lin	2.52944	1.78455				2.53	70.34	6.99627	36	0.85	2.5	68.6	34
GulfCo	Acer rubrum	ACRU	dbh	leaf area	sq. meters	1/dbh^2	quad	1.50836	-0.53033	0.09893			0.8	453.72	0.48743	33	0.922	0.2	435.9	30
GulfCo	Acer rubrum	ACRU	dbh	tree ht	meters	1/dbh	quad	1.46853	0.46904	-0.00359			2.63	16.77	0.15352	36	0.847	2	19	33
LoMidW	Acer rubrum	ACRU	dbh	age	years	1/dbh	quad	2.67773	0.47477	0.00714			1	110	1.04113	24	0.954	4	90	21
LoMidW	Acer rubrum	ACRU	dbh	crown dia	meters	1	loglogw1	-0.58934	2.25241	0.0172			0.32	15.77	0.13113	35	0.95	1.8	20.5	33
LoMidW	Acer rubrum	ACRU	dbh	crown ht	meters	1/dbh	quad	1.10084	0.31008	-0.00099			1.46	19.79	0.10063	35	0.924	2.5	29	32
LoMidW	Acer rubrum	ACRU	cdia	dbh	meters	1/cdia^2	cub	5.77068	-1.4072	0.65289	-0.01702		1.18	81.35	0.66245	35	0.935	5.1	100.1	31
LoMidW	Acer rubrum	ACRU	age	dbh	centimeters	1	quad	-0.2702	1.45336	-0.00647			1.18	81.35	28.1498	24	0.954	5.1	100.1	21
LoMidW	Acer rubrum	ACRU	dbh	leaf area	sq. meters	1/sqrt(dbh)	loglogw2	-1.66428	5.73259	0.01692			0.8	1012.02	0.13006	33	0.971	5.8	1868.7	31
LoMidW	Acer rubrum	ACRU	dbh	tree ht	meters	1/dbh	quad	2.51834	0.34622	-0.00127			2.92	22.31	0.10123	35	0.931	4	31	32
MidWst	Acer rubrum	ACRU	dbh	age	years	1	quad	-4.15944	1.18592	-0.01123			1	30	2.14388	46	0.972	0	28	43
MidWst	Acer rubrum	ACRU	dbh	crown dia	meters	1/sqrt(dbh)	cub	-0.3276	0.48909	-0.00869	8e-05		1.55	17.07	0.10777	46	0.961	0.9	14.2	42
MidWst	Acer rubrum	ACRU	dbh	crown ht	meters	1/dbh	quad	0.25274	0.34103	-0.0021			1.62	13.42	0.07929	46	0.878	1	13.5	43
MidWst	Acer rubrum	ACRU	cdia	dbh	meters	1/cdia^2	cub	3.03628	0.25987	0.48144	-0.01807		4.12	63.03	0.1721	46	0.963	3.8	54.6	42
MidWst	Acer rubrum	ACRU	age	dbh	centimeters	1/sqrt(age)	cub	4.12164	1.34432	-0.07276	0.00311		4.12	63.03	1.63944	46	0.981	3.8	54.6	42
MidWst	Acer rubrum	ACRU	dbh	leaf area	sq. meters	1	loglogw1	-6.24096	8.89939	0.11788			0.21	712.74	0.34334	46	0.98	0.1	603.3	44
MidWst	Acer rubrum	ACRU	dbh	tree ht	meters	1	loglogw1	0.13264	1.91472	0.03171			2.98	17.62	0.17807	46	0.893	2.5	18	44
NoEast	Acer rubrum	ACRU	dbh	age	years	1/dbh^2	cub	0.93244	0.02113	0.05658	-0.00055		0	119	0.07354	62	0.924	2	103	58
NoEast	Acer rubrum	ACRU	dbh	crown dia	meters	1/dbh	quad	0.20703	0.32103	-0.00152			1.04	17.15	0.06742	46	0.932	1.3	21.9	43
NoEast	Acer rubrum	ACRU	dbh	crown ht	meters	1/dbh	lin	2.20449	0.15467				2.61	18.48	0.12037	46	0.846	2.5	26	44
NoEast	Acer rubrum	ACRU	cdia	dbh	meters	1	loglogw1	1.48747	2.67841	0.08663			3.89	105.2	0.29433	46	0.865	3.2	124.5	44
NoEast	Acer rubrum	ACRU	age	dbh	centimeters	1/age	cub	2.64166	1.27076	-0.01758	0.00012		2.64	105.2	0.66271	62	0.946	3.2	124.5	58
NoEast	Acer rubrum	ACRU	dbh	leaf area	sq. meters	1	loglogw1	-1.35066	5.19281	0.18655			1.41	853.95	0.43192	34	0.911	2.9	1023.8	32
NoEast	Acer rubrum	ACRU	dbh	tree ht	meters	1/dbh^2	quad	3.21698	0.24941	-0.00065			3.87	22.24	0.00346	46	0.884	4	31	43
PacfNW	Acer rubrum	ACRU	dbh	age	years	1/dbh	quad	0.19481	0.65916	-0.00084			1	60	0.10634	39	0.987	1	53	36
PacfNW	Acer rubrum	ACRU	dbh	crown dia	meters	1/dbh	cub	0.16933	0.43289	-0.00526	3e-05		0.73	21.87	0.00211	39	0.969	0.4	22.1	35
PacfNW	Acer rubrum	ACRU	dbh	crown ht	meters	1/dbh	cub	0.57374	0.52078	-0.00953	7e-05		1.25	21.88	0.05749	39	0.952	1	21	35
PacfNW	Acer rubrum	ACRU	cdia	dbh	meters	1/cdia^2	cub	0.64872	1.37806	0.27303	-0.00666		2.94	96.47	0.38008	39	0.957	1.2	95	35
PacfNW	Acer rubrum	ACRU	age	dbh	centimeters	1/age	lin	-0.28784	1.61264				1.32	96.47	0.47538	39	0.986	1.2	95	37
PacfNW	Acer rubrum	ACRU	dbh	leaf area	sq. meters	1	loglogw1	-0.4824	4.97236	0.24582			0.52	1360.01	0.4958	38	0.951	0.1	1129.7	36
PacfNW	Acer rubrum	ACRU	dbh	tree ht	meters	1/dbh	cub	1.95274	0.61834	-0.01179	8e-05		2.75	27.55	0.06121	39	0.961	2.5	27	35
Piedmt	Acer rubrum	ACRU	dbh	age	years	1/sqrt(dbh)	quad	-1.67659	0.66594	-0.00162			0	57	0.56735	44	0.987	3	60	41
Piedmt	Acer rubrum	ACRU	dbh	crown dia	meters	1	loglogw1	-1.22652	2.73952	0.02336			1.17	21.9	0.15285	44	0.949	2	30.1	42
Piedmt	Acer rubrum	ACRU	dbh	crown ht	meters	1/dbh	quad	0.46515	0.36234	-0.00147			1.96	22.81	0.11962	44	0.916	3	30	41
Piedmt	Acer rubrum	ACRU	cdia	dbh	meters	1/cdia^2	cub	5.03293	0.3587	0.40222	-0.00938		5.48	122.46	0.79049	44	0.923	6.4	132.8	40
Piedmt	Acer rubrum	ACRU	age	dbh	centimeters	1/sqrt(age)	quad	4.18772	1.27754	0.01399			4.19	122.46	4.01129	44	0.984	6.4	132.8	41
Piedmt	Acer rubrum	ACRU	dbh	leaf area	sq. meters	1/sqrt(dbh)	loglogw2	-7.7164	10.0923	0.04044			0.26	3493.18	0.20109	41	0.971	0.4	2584.5	39
Piedmt	Acer rubrum	ACRU	dbh	tree ht	meters	1/dbh^2	cub	2.93522	0.24561	0.00217	-2e-05		4	26.29	0.00237	44	0.939	4.5	32	40
InlVal	Acer saccharinum	ACSA1	dbh	age	years	1/sqrt(dbh)	lin	2.76124	0.52827				1	75	7.80431	29	0.888	0	67	27
InlVal	Acer saccharinum	ACSA1	dbh	crown dia	meters	1	loglogw1	-0.30003	2.0639	0.02938			1.22	19.37	0.17141	29	0.949	1	20.8	27
InlVal	Acer saccharinum	ACSA1	dbh	crown ht	meters	1/sqrt(dbh)	quad	1.45287	0.31925	-0.00128			2.25	21.35	1.0934	29	0.885	0.5	24.5	26
InlVal	Acer saccharinum	ACSA1	cdia	dbh	meters	1/cdia	quad	-1.23065	2.64367	0.14384			1.22	19.37	11.1587	29	0.927	2.5	119.9	26
InlVal	Acer saccharinum	ACSA1	age	dbh	centimeters	1/age	lin	2.51245	1.6505				2.51	126.3	6.78131	29	0.924	2.5	119.9	27
InlVal	Acer saccharinum	ACSA1	dbh	leaf area	sq. meters	1	loglogw1	0.04738	4.34358	0.07905			3.23	1030.69	0.28115	28	0.969	2.5	1307.3	26
InlVal	Acer saccharinum	ACSA1	dbh	tree ht	meters	1	loglogw1	0.3591	1.81159	0.03437			2.22	25.15	0.1854	29	0.924	2	29.5	27
LoMidW	Acer saccharinum	ACSA1	dbh	age	years	1/dbh	quad	1.26026	1.08125	-0.00274			4	120	1.41464	27	0.947	4	97	24
LoMidW	Acer saccharinum	ACSA1	dbh	crown dia	meters	1/dbh	quad	0.77345	0.2696	-0.00119			1.15	16.01	0.08362	54	0.913	1.5	19.3	51
LoMidW	Acer saccharinum	ACSA1	dbh	crown ht	meters	1/sqrt(dbh)	quad	2.40169	0.27414	-0.00108			2.79	19.78	1.51426	54	0.741	2	25.5	51
LoMidW	Acer saccharinum	ACSA1	cdia	dbh	meters	1	loglogw1	1.37645	2.9203	0.08532			2.34	120.93	0.2921	54	0.862	2.5	128.8	52
LoMidW	Acer saccharinum	ACSA1	age	dbh	centimeters	1	loglogw1	-0.89552	3.61294	0.05324			1.42	120.14	0.23074	27	0.94	2.5	128.8	25
LoMidW	Acer saccharinum	ACSA1	dbh	leaf area	sq. meters	1/dbh^2	lin	-29.2496	10.5288				8.05	1235.63	15.7962	50	0.845	1.1	1683	48
LoMidW	Acer saccharinum	ACSA1	dbh	tree ht	meters	1	loglogw1	0.40754	1.71829	0.04609			1.27	22.42	0.21469	54	0.804	2.5	28	52
MidWst	Acer saccharinum	ACSA1	dbh	age	years	1	cub	2.26429	0.40698	-0.00273	2e-05		2	40	4.16334	42	0.969	0	44	38
MidWst	Acer saccharinum	ACSA1	dbh	crown dia	meters	1/dbh	cub	0.79381	0.34644	-0.00321	2e-05		1.55	19.42	0.06664	42	0.955	1	26	38
MidWst	Acer saccharinum	ACSA1	dbh	crown ht	meters	1/dbh	quad	1.04591	0.31588	-0.00172			1.75	15.54	0.16624	42	0.881	1	23	39
MidWst	Acer saccharinum	ACSA1	cdia	dbh	meters	1	loglogw1	0.86133	3.29774	0.04906			2.24	101.64	0.2215	42	0.959	0.8	111	40
MidWst	Acer saccharinum	ACSA1	age	dbh	centimeters	1	cub	-1.7914	1.88949	0.06576	-0.00121		2.24	101.64	34.6769	42	0.966	0.8	111	38
MidWst	Acer saccharinum	ACSA1	dbh	leaf area	sq. meters	1	loglogw1	-2.14054	5.72551	0.44629			0.8	997.35	0.66805	41	0.921	0	2294.9	39
MidWst	Acer saccharinum	ACSA1	dbh	tree ht	meters	1/dbh	quad	2.04821	0.41488	-0.00201			2.97	23.41	0.18016	42	0.932	2	31	39
NMtnPr	Acer saccharinum	ACSA1	dbh	age	years	1/dbh^2	lin	-1.71343	0.70562				1	120	0.02701	66	0.934	0	87	64
NMtnPr	Acer saccharinum	ACSA1	dbh	crown dia	meters	1/dbh^2	loglogw4	-0.73809	2.44287	1e-05			0.98	25.41	0.00256	65	0.925	2.6	25.9	63
NMtnPr	Acer saccharinum	ACSA1	dbh	crown ht	meters	1/sqrt(dbh)	cub	0.34465	0.49071	-0.00456	2e-05		1.7	22.22	0.78705	65	0.769	4.5	25	61
NMtnPr	Acer saccharinum	ACSA1	cdia	dbh	meters	1	loglogw1	0.4126	3.72384	0.05515			4.56	130	0.23485	65	0.837	2.9	144.8	63
NMtnPr	Acer saccharinum	ACSA1	age	dbh	centimeters	1/age^2	quad	2.8327	1.72872	-0.00484			2.83	140.59	0.13066	66	0.942	2.9	144.8	63
NMtnPr	Acer saccharinum	ACSA1	dbh	leaf area	sq. meters	1	loglogw1	-0.67729	5.20947	0.17475			3.29	2318.93	0.41803	58	0.876	2.9	2834.3	56
NMtnPr	Acer saccharinum	ACSA1	dbh	tree ht	meters	1	loglogw1	0.51893	1.70512	0.01808			2.81	25.8	0.13448	65	0.793	6.5	27.5	63
NoEast	Acer saccharinum	ACSA1	dbh	age	years	1/dbh^2	cub	1.655	0.22698	0.05987	-0.0008		1	150	0.25103	55	0.799	2	99	51
NoEast	Acer saccharinum	ACSA1	dbh	crown dia	meters	1/dbh	cub	0.73372	0.3504	-0.00296	1e-05		1.51	13.41	0.07348	54	0.935	1.7	21.7	50
NoEast	Acer saccharinum	ACSA1	dbh	crown ht	meters	1	loglogw1	0.15143	1.68838	0.0443			1.58	12.64	0.21048	54	0.828	2	22	52
NoEast	Acer saccharinum	ACSA1	cdia	dbh	meters	1/cdia^2	cub	2.71478	-0.12565	0.56738	-0.01531		1.89	63.58	1.121	54	0.923	0.9	123.2	50
NoEast	Acer saccharinum	ACSA1	age	dbh	centimeters	1	loglogw1	1.1583	1.77675	0.25666			2.25	58.49	0.50662	55	0.634	0.9	123.2	53
NoEast	Acer saccharinum	ACSA1	dbh	leaf area	sq. meters	1	loglogw1	-0.53332	4.75329	0.2281			1.98	538.02	0.4776	36	0.907	3	1427.2	34
NoEast	Acer saccharinum	ACSA1	dbh	tree ht	meters	1/sqrt(dbh)	loglogw2	0.42084	1.68914	0.00482			2.01	16.72	0.06943	54	0.935	2.5	27.5	52
Piedmt	Acer saccharinum	ACSA1	dbh	age	years	1/sqrt(dbh)	quad	-0.22078	0.54916	-0.00103			0	60	2.24949	48	0.942	3	50	45
Piedmt	Acer saccharinum	ACSA1	dbh	crown dia	meters	1/dbh	quad	1.20094	0.268	-0.00085			1.55	21.52	0.06285	48	0.949	2.2	24.4	45
Piedmt	Acer saccharinum	ACSA1	dbh	crown ht	meters	1/dbh	quad	0.75811	0.29822	-0.00125			1.14	18.51	0.08356	48	0.93	1	22	45
Piedmt	Acer saccharinum	ACSA1	cdia	dbh	meters	1	loglogw1	0.89489	3.26034	0.04473			1.3	127.83	0.2115	48	0.939	3	122.7	46
Piedmt	Acer saccharinum	ACSA1	age	dbh	centimeters	1/sqrt(age)	lin	1.29639	2.10889				1.3	127.83	16.8849	48	0.937	3	122.7	46
Piedmt	Acer saccharinum	ACSA1	dbh	leaf area	sq. meters	1	loglogw1	-4.80966	7.76832	0.41332			0.48	2424.88	0.6429	45	0.914	0.3	3340.3	43
Piedmt	Acer saccharinum	ACSA1	dbh	tree ht	meters	1/dbh	quad	2.22765	0.31233	-0.0011			2.63	24.16	0.07796	48	0.949	3	27	45
TpIntW	Acer saccharinum	ACSA1	dbh	age	years	1/dbh^2	cub	-0.65693	0.54654	0.00717	-5e-05		0	105	0.01052	58	0.969	1	105	54
TpIntW	Acer saccharinum	ACSA1	dbh	crown dia	meters	1/sqrt(dbh)	quad	3.08595	0.20185	-0.00039			3.89	21.95	0.64655	58	0.876	2.5	27.6	55
TpIntW	Acer saccharinum	ACSA1	dbh	crown ht	meters	1/sqrt(dbh)	quad	3.89635	0.26153	-0.00106			4.94	20.1	1.13696	58	0.753	4	24	55
TpIntW	Acer saccharinum	ACSA1	cdia	dbh	meters	1/cdia	cub	10.1373	-2.57703	0.70582	-0.01692		4.04	122.73	12.8515	58	0.886	5.1	137.9	54
TpIntW	Acer saccharinum	ACSA1	age	dbh	centimeters	1/age^2	cub	4.03735	0.99779	0.01328	-0.00011		4.04	122.73	0.07149	58	0.952	5.1	137.9	54
TpIntW	Acer saccharinum	ACSA1	dbh	leaf area	sq. meters	1	loglogw1	-0.79772	4.99609	0.2716			7.43	1335.3	0.52115	48	0.811	4.4	2783.9	46
TpIntW	Acer saccharinum	ACSA1	dbh	tree ht	meters	1	quad	5.29523	0.27851	-0.00099			6.4	24.64	8.29673	58	0.763	5.5	29	55
LoMidW	Acer saccharum	ACSA2	dbh	age	years	1/dbh^2	lin	0.46611	1.07285				2	120	0.16834	14	0.799	4	105	12
LoMidW	Acer saccharum	ACSA2	dbh	crown dia	meters	1	loglogw1	-0.30613	2.01868	0.02727			0.74	14.78	0.16513	37	0.921	1.5	22.4	35
LoMidW	Acer saccharum	ACSA2	dbh	crown ht	meters	1/dbh	quad	0.76026	0.34195	-0.00149			1.33	18.69	0.14024	37	0.906	2	25	34
LoMidW	Acer saccharum	ACSA2	cdia	dbh	meters	1/sqrt(cdia)	loglogw2	1.03786	3.12362	0.02029			1.58	82.51	0.14245	37	0.945	2.5	118.1	35
LoMidW	Acer saccharum	ACSA2	age	dbh	centimeters	1	loglogw1	0.16044	2.68385	0.08969			1.68	80.88	0.29948	14	0.908	2.5	118.1	12
LoMidW	Acer saccharum	ACSA2	dbh	leaf area	sq. meters	1	loglogw1	-0.91222	5.24025	0.185			0.6	1060.97	0.43012	37	0.92	1.3	2236.4	35
LoMidW	Acer saccharum	ACSA2	dbh	tree ht	meters	1/dbh	quad	2.31585	0.36743	-0.00157			2.93	21.79	0.16538	37	0.905	3.5	28	34
MidWst	Acer saccharum	ACSA2	dbh	age	years	1	cub	-1.47565	0.72355	-0.00405	4e-05		1	60	1.33169	48	0.994	0	52	44
MidWst	Acer saccharum	ACSA2	dbh	crown dia	meters	1/dbh	quad	0.40106	0.30962	-0.00154			1.17	15.67	0.09396	48	0.909	1.1	16.9	45
MidWst	Acer saccharum	ACSA2	dbh	crown ht	meters	1	loglogw1	-0.29475	2.03741	0.02735			1.22	15.82	0.16538	48	0.937	1.5	18	46
MidWst	Acer saccharum	ACSA2	cdia	dbh	meters	1/cdia	lin	-2.33279	4.49317				3.85	86.15	9.68502	48	0.895	3.3	83.3	46
MidWst	Acer saccharum	ACSA2	age	dbh	centimeters	1	cub	2.52368	1.31314	0.01822	-0.00028		2.52	86.15	3.16858	48	0.995	3.3	83.3	44
MidWst	Acer saccharum	ACSA2	dbh	leaf area	sq. meters	1	loglogw1	-5.30849	8.07822	0.32745			0.44	1181.06	0.57223	48	0.951	0	1132.5	46
MidWst	Acer saccharum	ACSA2	dbh	tree ht	meters	1/dbh	cub	1.40329	0.61086	-0.00895	6e-05		2.89	23.46	0.06041	48	0.96	3	23.5	44
NMtnPr	Acer saccharum	ACSA2	dbh	age	years	1/sqrt(dbh)	lin	-1.27606	0.92035				1	80	2.6718	22	0.966	0	77	20
NMtnPr	Acer saccharum	ACSA2	dbh	crown dia	meters	1/sqrt(dbh)	cub	-0.58275	0.63195	-0.00979	6e-05		0.82	18.29	0.06878	21	0.987	1.1	18.1	17
NMtnPr	Acer saccharum	ACSA2	dbh	crown ht	meters	1/sqrt(dbh)	quad	1.46638	0.34859	-0.00211			2.26	15.85	0.20349	21	0.95	1.5	17.5	18
NMtnPr	Acer saccharum	ACSA2	cdia	dbh	meters	1/cdia^2	quad	2.87731	0.16644	0.23426			3.34	84.61	0.14503	21	0.963	2.3	84.2	18
NMtnPr	Acer saccharum	ACSA2	age	dbh	centimeters	1/age	lin	2.30714	1.02877				2.31	84.61	1.05459	22	0.943	2.3	84.2	20
NMtnPr	Acer saccharum	ACSA2	dbh	leaf area	sq. meters	1	loglogw1	0.04717	4.6728	0.13717			3.14	1205.28	0.37037	21	0.964	3.3	1492.4	19
NMtnPr	Acer saccharum	ACSA2	dbh	tree ht	meters	1	loglogw1	0.59585	1.53901	0.01712			2.42	18.11	0.13086	21	0.959	2.5	21	19
NoEast	Acer saccharum	ACSA2	dbh	age	years	1	loglogw1	-0.54715	3.22652	0.0706			0	121	0.2657	16	0.91	2	95	14
NoEast	Acer saccharum	ACSA2	dbh	crown dia	meters	1/sqrt(dbh)	quad	0.79563	0.28114	-0.0013			1.4	15.95	0.30417	31	0.937	1.5	17.7	28
NoEast	Acer saccharum	ACSA2	dbh	crown ht	meters	1/dbh	lin	1.83951	0.19211				2.26	22.11	0.14262	31	0.877	2	22	29
NoEast	Acer saccharum	ACSA2	cdia	dbh	meters	1/cdia	quad	0.71706	2.40298	0.18081			3.02	105.5	9.10548	31	0.919	2.9	105.7	28
NoEast	Acer saccharum	ACSA2	age	dbh	centimeters	1/age	lin	2.17085	0.85396				2.17	105.5	0.76475	16	0.908	2.9	105.7	14
NoEast	Acer saccharum	ACSA2	dbh	leaf area	sq. meters	1	loglogw1	-1.1744	5.16173	0.30588			1.23	1037.94	0.55307	25	0.904	1.3	1056	23
NoEast	Acer saccharum	ACSA2	dbh	tree ht	meters	1/dbh	lin	3.14132	0.23463				3.65	27.9	0.17939	31	0.894	3	28.5	29
PacfNW	Acer saccharum	ACSA2	dbh	age	years	1/dbh	quad	0.35741	0.33851	0.00463			0	73	0.40512	37	0.983	1	74	34
PacfNW	Acer saccharum	ACSA2	dbh	crown dia	meters	1/dbh^2	quad	-0.04297	0.26749	-0.00063			0.35	19.18	0.00105	37	0.974	0.3	21.6	34
PacfNW	Acer saccharum	ACSA2	dbh	crown ht	meters	1/dbh	quad	1.2475	0.32945	-0.00126			1.73	20.85	0.10449	37	0.957	1.5	25	34
PacfNW	Acer saccharum	ACSA2	cdia	dbh	meters	1/cdia^2	cub	0.33495	3.17841	0.28395	-0.0112		3.14	91.77	0.49783	37	0.971	1.3	97.9	33
PacfNW	Acer saccharum	ACSA2	age	dbh	centimeters	1/sqrt(age)	cub	1.47953	1.65885	0.00513	-0.00015		1.48	91.77	3.00231	37	0.99	1.3	97.9	33
PacfNW	Acer saccharum	ACSA2	dbh	leaf area	sq. meters	1/dbh	loglogw3	-1.68905	5.95471	0.00136			1.5	1586.68	0.03688	32	0.998	0.1	2159.1	30
PacfNW	Acer saccharum	ACSA2	dbh	tree ht	meters	1/dbh	cub	1.10482	0.62678	-0.0077	4e-05		2.02	25.88	0.54725	37	0.968	1.5	30.5	33
Piedmt	Acer saccharum	ACSA2	dbh	age	years	1	loglogw1	-1.24539	3.32009	0.07602			1	56	0.27571	40	0.895	3	75	38
Piedmt	Acer saccharum	ACSA2	dbh	crown dia	meters	1/dbh	quad	0.78702	0.34617	-0.00164			1.01	18.32	0.0487	40	0.952	2	20.7	37
Piedmt	Acer saccharum	ACSA2	dbh	crown ht	meters	1	loglogw1	-0.47439	2.29608	0.04443			1.35	19.4	0.21079	40	0.875	2.5	24	38
Piedmt	Acer saccharum	ACSA2	cdia	dbh	meters	1	loglogw1	0.84668	3.1315	0.04467			0.64	84.67	0.21136	40	0.931	5.6	87.9	38
Piedmt	Acer saccharum	ACSA2	age	dbh	centimeters	1/age	cub	-1.68001	2.32536	-0.00094	-0.00023		0.64	84.67	0.99265	40	0.972	5.6	87.9	36
Piedmt	Acer saccharum	ACSA2	dbh	leaf area	sq. meters	1	loglogw1	-5.90451	8.77915	0.31248			1.17	1818.43	0.559	36	0.941	1	2804.4	34
Piedmt	Acer saccharum	ACSA2	dbh	tree ht	meters	1/dbh	quad	2.53765	0.40849	-0.00178			2.8	24.35	0.13665	40	0.915	4.5	28	37
TpIntW	Acer saccharum	ACSA2	dbh	age	years	1/dbh^2	lin	-3.03158	1.02471				0	84	0.02761	30	0.955	1	105	28
TpIntW	Acer saccharum	ACSA2	dbh	crown dia	meters	1/dbh	cub	-0.83985	0.57571	-0.00889	6e-05		1.11	16.82	0.0288	30	0.971	1.2	18.8	26
TpIntW	Acer saccharum	ACSA2	dbh	crown ht	meters	1/dbh^2	lin	2.46358	0.23606				3.31	20.5	0.00241	30	0.929	3.5	24	28
TpIntW	Acer saccharum	ACSA2	cdia	dbh	meters	1/cdia^2	cub	4.18068	-0.53442	0.48595	-0.01275		3.58	76.42	0.26795	30	0.967	4.1	80.5	26
TpIntW	Acer saccharum	ACSA2	age	dbh	centimeters	1/age	cub	3.57791	0.71647	0.01416	-0.00015		3.58	76.42	0.33427	30	0.987	4.1	80.5	26
TpIntW	Acer saccharum	ACSA2	dbh	leaf area	sq. meters	1/sqrt(dbh)	loglogw2	-1.56007	5.77921	0.03458			2.45	1195.82	0.18595	26	0.953	3.6	1499	24
TpIntW	Acer saccharum	ACSA2	dbh	tree ht	meters	1/dbh^2	lin	2.83157	0.28639				3.86	24.72	0.00247	30	0.949	4	28.5	28
NoEast	Aesculus hippocastanum	AEHI	dbh	age	years	1	quad	-1.3217	1.38284	-0.00555			0	80	16.3702	25	0.967	2	44	22
NoEast	Aesculus hippocastanum	AEHI	dbh	crown dia	meters	1/sqrt(dbh)	cub	0.16411	0.36854	-0.00599	4e-05		1.33	16.29	0.23416	33	0.919	0.5	17.8	29
NoEast	Aesculus hippocastanum	AEHI	dbh	crown ht	meters	1/sqrt(dbh)	lin	1.1662	0.16711				1.73	16.21	0.52662	33	0.872	0.5	17	31
NoEast	Aesculus hippocastanum	AEHI	cdia	dbh	meters	1/cdia^2	cub	4.35979	-1.80599	1.22827	-0.05025		3.81	90.02	0.88533	33	0.955	2.4	90.2	29
NoEast	Aesculus hippocastanum	AEHI	age	dbh	centimeters	1/sqrt(age)	quad	3.34694	0.45797	0.00782			3.35	90.02	2.88861	25	0.969	2.4	90.2	22
NoEast	Aesculus hippocastanum	AEHI	dbh	leaf area	sq. meters	1	loglogw1	-2.24482	5.56941	0.26069			1.45	546.94	0.51058	26	0.901	1.1	739.8	24
NoEast	Aesculus hippocastanum	AEHI	dbh	tree ht	meters	1/sqrt(dbh)	quad	1.36605	0.31715	-0.00145			2.41	18.15	0.57671	33	0.894	1.5	21	30
Tropic	Bauhinia x blakeana	BABL	dbh	age	years	1/dbh	lin	0.08111	0.93867				0	61	2.61936	36	0.724	0.1	55	34
Tropic	Bauhinia x blakeana	BABL	dbh	crown dia	meters	1/dbh^2	loglogw4	0.04708	1.53581	0.0001			1.44	7.94	0.01008	34	0.961	1.5	10.5	32
Tropic	Bauhinia x blakeana	BABL	dbh	crown ht	meters	1/dbh	loglogw3	-0.13433	1.39504	0.0043			1.17	5.53	0.06558	33	0.785	1.2	9	31
Tropic	Bauhinia x blakeana	BABL	cdia	dbh	meters	1	quad	-8.29405	7.28738	-0.3264			3.67	41.2	28.3809	34	0.639	2.5	53.3	31
Tropic	Bauhinia x blakeana	BABL	age	dbh	centimeters	1/age^2	quad	2.41229	1.26996	-0.0104			2.41	41.2	0.10547	36	0.9	2.5	53.3	33
Tropic	Bauhinia x blakeana	BABL	dbh	leaf area	sq. meters	1/sqrt(dbh)	loglogw2	-1.48591	4.57456	0.13703			0.64	101.33	0.37017	35	0.746	0.9	266.4	33
Tropic	Bauhinia x blakeana	BABL	dbh	tree ht	meters	1/dbh	loglogw3	0.24815	1.47781	0.0026			1.74	9.02	0.05102	34	0.87	1.8	12	32
Piedmt	Betula nigra	BENI	dbh	age	years	1	loglogw1	-0.26433	2.48218	0.03476			1	35	0.18644	39	0.886	2	35	37
Piedmt	Betula nigra	BENI	dbh	crown dia	meters	1/dbh^2	lin	2.45947	0.20529				2.65	17.47	0.00233	39	0.908	3.2	20.9	37
Piedmt	Betula nigra	BENI	dbh	crown ht	meters	1/dbh	quad	1.81237	0.34685	-0.00223			2.14	15.26	0.18182	39	0.767	3	19	36
Piedmt	Betula nigra	BENI	cdia	dbh	meters	1	loglogw1	0.57271	3.4644	0.06753			0.95	73.14	0.25987	39	0.846	3.6	72.1	37
Piedmt	Betula nigra	BENI	age	dbh	centimeters	1/age^2	lin	-1.17183	2.12321				0.95	73.14	0.27529	39	0.893	3.6	72.1	37
Piedmt	Betula nigra	BENI	dbh	leaf area	sq. meters	1	loglogw1	-4.04566	7.20117	0.51472			0.68	978.56	0.71744	34	0.825	0.8	1232.1	32
Piedmt	Betula nigra	BENI	dbh	tree ht	meters	1/dbh	quad	2.67649	0.39402	-0.00246			3.05	18.34	0.18084	39	0.816	4.5	23	36
InlVal	Betula pendula	BEPE	dbh	age	years	1/sqrt(dbh)	quad	-3.32796	1.93304	-0.02674			0	51	11.1797	29	0.592	0	38	26
InlVal	Betula pendula	BEPE	dbh	crown dia	meters	1/dbh^2	cub	-1.41102	0.88459	-0.03377	0.00044		0.62	11.18	0.00314	29	0.751	0.6	10.3	25
InlVal	Betula pendula	BEPE	dbh	crown ht	meters	1	loglogw1	-0.53196	2.37568	0.07297			1.09	15.04	0.27012	29	0.765	0.8	14	27
InlVal	Betula pendula	BEPE	cdia	dbh	meters	1/cdia^2	lin	0.25935	3.64604				0.62	11.18	1.13006	29	0.874	2.5	47.6	27
InlVal	Betula pendula	BEPE	age	dbh	centimeters	1/age^2	lin	2.53121	0.87957				2.53	47.39	0.11735	29	0.859	2.5	47.6	27
InlVal	Betula pendula	BEPE	dbh	leaf area	sq. meters	1	loglogw1	0.19484	3.92178	0.18512			3.99	271.48	0.43025	28	0.778	1.9	278.9	26
InlVal	Betula pendula	BEPE	dbh	tree ht	meters	1	loglogw1	0.16763	1.93095	0.03647			1.9	16.35	0.19096	29	0.812	1.5	15.5	27
PacfNW	Betula pendula	BEPE	dbh	age	years	1/dbh^2	quad	0.39331	0.52785	0.00437			1	47	0.01709	41	0.955	1	46	38
PacfNW	Betula pendula	BEPE	dbh	crown dia	meters	1/dbh	cub	0.35044	0.37618	-0.00631	7e-05		0.79	11.19	0.00164	41	0.96	0.6	13.9	37
PacfNW	Betula pendula	BEPE	dbh	crown ht	meters	1/dbh	quad	1.14308	0.53014	-0.00455			1.76	16.14	0.12264	41	0.947	1.5	20	38
PacfNW	Betula pendula	BEPE	cdia	dbh	meters	1/cdia^2	cub	0.82226	0.2215	0.8505	-0.04466		3.23	48.32	0.32985	41	0.971	1.2	58.5	37
PacfNW	Betula pendula	BEPE	age	dbh	centimeters	1/age	quad	-0.91466	2.11608	-0.02273			1.18	48.32	0.8507	41	0.969	1.2	58.5	38
PacfNW	Betula pendula	BEPE	dbh	leaf area	sq. meters	1/dbh^2	quad	-0.05315	0.15892	0.2975			0.55	702.25	7.51625	41	0.934	0.1	1198.1	38
PacfNW	Betula pendula	BEPE	dbh	tree ht	meters	1/dbh	quad	1.42669	0.70065	-0.00668			2.24	19.68	0.14186	41	0.96	2	23	38
InlEmp	Brachychiton populneum	BRPO	dbh	age	years	1/dbh^2	cub	-0.02017	-0.05881	0.05275	-0.00065		0	50	0.01515	37	0.972	0	45	33
InlEmp	Brachychiton populneum	BRPO	dbh	crown dia	meters	1/dbh	quad	1.35462	0.23061	-0.00172			1.74	9.07	0.0461	37	0.872	1.8	9.3	34
InlEmp	Brachychiton populneum	BRPO	dbh	crown ht	meters	1/dbh	quad	1.14508	0.19443	-0.00135			1.47	8.09	0.0494	37	0.826	1.5	8.5	34
InlEmp	Brachychiton populneum	BRPO	cdia	dbh	meters	1/cdia^2	lin	-7.41513	5.70893				1.68	45	1.30253	37	0.839	1.5	63.8	35
InlEmp	Brachychiton populneum	BRPO	age	dbh	centimeters	1/age	cub	1.67923	2.25021	-0.08017	0.00122		1.68	66.02	0.8343	37	0.967	1.5	63.8	33
InlEmp	Brachychiton populneum	BRPO	dbh	leaf area	sq. meters	1	loglogw1	-3.5765	6.36243	0.29256			0.59	301.24	0.08559	34	0.777	2.3	266	32
InlEmp	Brachychiton populneum	BRPO	dbh	tree ht	meters	1/dbh	quad	1.56417	0.2668	-0.0021			2.01	10.05	0.05091	37	0.888	2	10	34
SWDsrt	Brachychiton populneum	BRPO	dbh	age	years	1/dbh^2	lin	-2.93366	1.17723				0	95	0.29572	35	0.69	0	91	33
SWDsrt	Brachychiton populneum	BRPO	dbh	crown dia	meters	1/dbh^2	lin	0.5051	0.18184				0.96	12.94	0.00121	35	0.929	1	14	33
SWDsrt	Brachychiton populneum	BRPO	dbh	crown ht	meters	1/dbh	quad	0.61354	0.26392	-0.0017			1.27	10.71	0.08964	35	0.777	1	13.2	32
SWDsrt	Brachychiton populneum	BRPO	cdia	dbh	meters	1/sqrt(cdia)	lin	-0.28616	4.92625				2.52	68.4	6.97696	35	0.932	2.5	65.7	33
SWDsrt	Brachychiton populneum	BRPO	age	dbh	centimeters	1/age^2	cub	2.52375	1.62224	-0.03307	0.00025		2.52	68.4	0.16353	35	0.873	2.5	65.7	31
SWDsrt	Brachychiton populneum	BRPO	dbh	leaf area	sq. meters	1	loglogw1	-2.23553	5.55072	0.45783			0.97	434.64	0.67663	35	0.816	0.8	598.9	33
SWDsrt	Brachychiton populneum	BRPO	dbh	tree ht	meters	1/dbh	quad	2.02751	0.29234	-0.00155			2.76	14.77	0.07261	35	0.86	2.4	17.5	32
SoCalC	Callistemon citrinus	CACI	dbh	age	years	1/dbh^2	quad	-5.57665	2.24729	-0.02217			0	55	0.05037	28	0.964	0	50	25
SoCalC	Callistemon citrinus	CACI	dbh	crown dia	meters	1	loglogw1	-0.96023	2.24998	0.00872			0.65	6.83	0.09336	28	0.952	0.6	6.9	26
SoCalC	Callistemon citrinus	CACI	dbh	crown ht	meters	1/dbh^2	lin	0.70461	0.12253				1.02	5.04	0.0022	28	0.767	1	5.5	26
SoCalC	Callistemon citrinus	CACI	cdia	dbh	meters	1/cdia^2	quad	0.76334	2.76864	0.29416			2.53	35.4	0.27999	28	0.97	2.5	38	25
SoCalC	Callistemon citrinus	CACI	age	dbh	centimeters	1/age^2	lin	2.53402	0.59754				2.53	35.4	0.0099	28	0.971	2.5	38	26
SoCalC	Callistemon citrinus	CACI	dbh	leaf area	sq. meters	1/dbh^2	loglogw4	-0.90528	3.85103	0.00066			0.99	84.2	0.02563	27	0.965	1	100.7	25
SoCalC	Callistemon citrinus	CACI	dbh	tree ht	meters	1/sqrt(dbh)	quad	0.61551	0.35108	-0.00472			1.47	7.13	0.09734	28	0.835	1.5	7.6	25
PacfNW	Calocedrus decurrens	CADE2	dbh	age	years	1	cub	-3.92586	1.19536	-0.01523	7e-05		2	23	5.92081	38	0.935	2	31	34
PacfNW	Calocedrus decurrens	CADE2	dbh	crown dia	meters	1	loglogw1	-0.81693	1.39977	0.05206			0.87	3.05	0.22817	38	0.799	0.7	5.3	36
PacfNW	Calocedrus decurrens	CADE2	dbh	crown ht	meters	1/dbh	cub	1.04793	0.20865	0.00281	-4e-05		1.91	13.62	0.06425	38	0.947	1.5	17.5	34
PacfNW	Calocedrus decurrens	CADE2	cdia	dbh	meters	1/cdia^2	cub	-0.3338	-4.50349	14.5381	-2.22352		1.69	70	16.8955	38	0.896	2.9	89.6	34
PacfNW	Calocedrus decurrens	CADE2	age	dbh	centimeters	1/age^2	lin	-0.5418	2.23052				3.92	50.76	0.23807	38	0.929	2.9	89.6	36
PacfNW	Calocedrus decurrens	CADE2	dbh	leaf area	sq. meters	1	loglogw1	-3.08102	5.42583	0.12706			0.71	86.02	0.35645	38	0.961	0.2	182.9	36
PacfNW	Calocedrus decurrens	CADE2	dbh	tree ht	meters	1	quad	-0.43078	0.46333	-0.00309			1.34	15.12	2.52066	38	0.918	1.5	19.5	35
Tropic	Calophyllum inophyllum	CAIN4	dbh	age	years	1/dbh^2	cub	-2.06134	0.84491	0.01063	-0.00012		0	102	0.03434	62	0.951	0.1	75	58
Tropic	Calophyllum inophyllum	CAIN4	dbh	crown dia	meters	1/dbh	cub	-0.10751	0.32917	-0.00353	2e-05		0.66	17.25	0.06262	62	0.915	0.7	18	58
Tropic	Calophyllum inophyllum	CAIN4	dbh	crown ht	meters	1	lin	1.95107	0.06982				2.12	8.83	1.9312	60	0.663	1	11	58
Tropic	Calophyllum inophyllum	CAIN4	cdia	dbh	meters	1/sqrt(cdia)	lin	-3.61828	5.55967				3.5	98.56	35.9141	62	0.879	2.5	96.5	60
Tropic	Calophyllum inophyllum	CAIN4	age	dbh	centimeters	1/age^2	quad	2.38911	1.11176	-0.00166			2.39	98.56	0.04902	62	0.954	2.5	96.5	59
Tropic	Calophyllum inophyllum	CAIN4	dbh	leaf area	sq. meters	1	loglogw1	-1.39157	4.47435	0.91659			2.53	351.49	0.95739	60	0.564	0.8	708.8	58
Tropic	Calophyllum inophyllum	CAIN4	dbh	tree ht	meters	1	quad	2.85092	0.17322	-0.00063			3.26	13.77	2.73484	60	0.775	1.5	16	57
PacfNW	Carpinus betulus 'Fastigiata'	CABEF	dbh	age	years	1	cub	-0.97624	1.02991	-0.01942	0.00016		2	34	1.41721	39	0.963	1	23	35
PacfNW	Carpinus betulus 'Fastigiata'	CABEF	dbh	crown dia	meters	1/dbh^2	cub	0.124	0.11118	0.00861	-0.00015		0.53	9.26	0	39	0.972	0.2	10.2	35
PacfNW	Carpinus betulus 'Fastigiata'	CABEF	dbh	crown ht	meters	1	loglogw1	0.21394	1.66187	0.02607			2.17	12.31	0.16147	39	0.957	0.5	13	37
PacfNW	Carpinus betulus 'Fastigiata'	CABEF	cdia	dbh	meters	1	loglogw1	2.31114	1.4967	0.03034			3	38	0.00092	39	0.972	0.8	51.6	37
PacfNW	Carpinus betulus 'Fastigiata'	CABEF	age	dbh	centimeters	1/age	cub	-0.99936	2.16074	-0.08853	0.00412		3	51.96	0.73563	39	0.97	0.8	51.6	35
PacfNW	Carpinus betulus 'Fastigiata'	CABEF	dbh	leaf area	sq. meters	1	loglogw1	-3.09187	6.99008	0.17664			0.69	811.38	0.42029	37	0.96	0.1	562.5	35
PacfNW	Carpinus betulus 'Fastigiata'	CABEF	dbh	tree ht	meters	1	loglogw1	0.68427	1.47106	0.01592			3.23	15.11	0.12619	39	0.966	1	15	37
GulfCo	Carya illinoinensis	CAIL	dbh	age	years	1/dbh^2	quad	-2.3867	1.00638	-0.0041			1	70	0.02354	36	0.948	0	60	33
GulfCo	Carya illinoinensis	CAIL	dbh	crown dia	meters	1/sqrt(dbh)	lin	2.5373	0.202324				3.05	20.87	1.07559	36	0.746	0.7	25.9	34
GulfCo	Carya illinoinensis	CAIL	dbh	crown ht	meters	1/sqrt(dbh)	loglogw2	-0.51305	2.28579	0.01293			1.03	19.99	0.11373	36	0.895	1	22.5	34
GulfCo	Carya illinoinensis	CAIL	cdia	dbh	meters	1	lin	1.10501	3.62607				3.79	1295.7	121.385	36	0.705	2.5	90.9	34
GulfCo	Carya illinoinensis	CAIL	age	dbh	centimeters	1/age^2	lin	2.52741	1.25824				2.53	90.6	0.09093	36	0.943	2.5	90.9	34
GulfCo	Carya illinoinensis	CAIL	dbh	leaf area	sq. meters	1/sqrt(dbh)	loglogw2	-7.12362	9.46524	0.03456			0.22	1501.18	0.03456	27	0.846	21.1	1512.8	25
GulfCo	Carya illinoinensis	CAIL	dbh	tree ht	meters	1	loglogw1	0.17767	1.92206	0.0509			1.94	21.91	0.22561	36	0.798	1.8	26	34
Tropic	Cassia x nealiae	CANE33	dbh	age	years	1/dbh^2	quad	-2.51409	1.14022	-0.00382			1	69	0.0544	41	0.911	0.1	80	38
Tropic	Cassia x nealiae	CANE33	dbh	crown dia	meters	1/dbh	quad	0.34958	0.36286	-0.0023			1.59	14.69	0.11366	41	0.879	0.8	17.8	38
Tropic	Cassia x nealiae	CANE33	dbh	crown ht	meters	1	loglogw1	-0.97643	2.19542	0.16559			1.04	10.03	0.40692	41	0.656	0.6	16	39
Tropic	Cassia x nealiae	CANE33	cdia	dbh	meters	1	loglogw1	1.64853	2.31151	0.38136			3.49	78.6	0.14543	41	0.769	2.5	93.7	39
Tropic	Cassia x nealiae	CANE33	age	dbh	centimeters	1/age^2	lin	2.38894	1.10447				3.49	78.6	0.09673	41	0.922	2.5	93.7	39
Tropic	Cassia x nealiae	CANE33	dbh	leaf area	sq. meters	1/dbh^2	cub	-1.7186	-0.12549	0.21178	-0.0016		0.36	518.17	6.95533	41	0.762	0.5	867.6	37
Tropic	Cassia x nealiae	CANE33	dbh	tree ht	meters	1	loglogw1	0.10992	1.66696	0.04536			2.26	13.19	0.21299	41	0.802	1.6	17.5	39
Tropic	Casuarina equisetifolia	CAEQ	dbh	age	years	1/sqrt(dbh)	cub	-9.83373	2.20859	-0.01674	5e-05		0	115	35.0003	62	0.847	0.1	115	58
Tropic	Casuarina equisetifolia	CAEQ	dbh	crown dia	meters	1/dbh	quad	1.60609	0.15719	-0.00044			1.99	13.88	0.12557	61	0.78	1.6	20.9	58
Tropic	Casuarina equisetifolia	CAEQ	dbh	crown ht	meters	1/sqrt(dbh)	quad	1.75538	0.27279	-0.00111			2.41	18.53	2.13809	60	0.681	2	24.5	57
Tropic	Casuarina equisetifolia	CAEQ	cdia	dbh	meters	1/cdia	lin	-2.03876	7.52639				2.44	116.29	76.9779	61	0.686	2.5	162.3	59
Tropic	Casuarina equisetifolia	CAEQ	age	dbh	centimeters	1/age^2	lin	2.44092	0.99003				2.44	116.29	0.12223	62	0.885	2.5	162.3	60
Tropic	Casuarina equisetifolia	CAEQ	dbh	leaf area	sq. meters	1	loglogw1	-2.29715	5.24754	0.40046			0.67	451	0.63282	26	0.89	0.9	962.3	24
Tropic	Casuarina equisetifolia	CAEQ	dbh	tree ht	meters	1/dbh	quad	2.26166	0.36074	-0.00147			3.13	24.3	0.47858	61	0.762	2.5	35	58
LoMidW	Catalpa speciosa	CASP	dbh	age	years	1/dbh^2	cub	0.98321	0.31085	0.01805	-0.00013		2	115	0.02242	59	0.957	2	94	55
LoMidW	Catalpa speciosa	CASP	dbh	crown dia	meters	1/dbh	cub	1.16675	0.24286	-0.00211	1e-05		1.39	12.96	0.03051	49	0.928	1.9	16.3	45
LoMidW	Catalpa speciosa	CASP	dbh	crown ht	meters	1	loglogw1	0.07263	1.77743	0.07716			0.57	16.79	0.27777	49	0.694	2	24.5	47
LoMidW	Catalpa speciosa	CASP	cdia	dbh	meters	1	loglogw1	0.95774	3.64644	0.06038			2.72	105.73	0.24572	49	0.902	3.7	127.3	47
LoMidW	Catalpa speciosa	CASP	age	dbh	centimeters	1	loglogw1	0.73449	2.4836	0.06565			0.94	104.07	0.25622	59	0.891	3.7	127.3	57
LoMidW	Catalpa speciosa	CASP	dbh	leaf area	sq. meters	1	loglogw1	-0.38359	4.46988	0.15712			0.18	710.02	0.39639	44	0.882	3.6	982.7	42
LoMidW	Catalpa speciosa	CASP	dbh	tree ht	meters	1	loglogw1	0.48473	1.59595	0.06665			0.91	19.11	0.25816	49	0.679	3	26.5	47
TpIntW	Catalpa speciosa	CASP	dbh	age	years	1/dbh^2	cub	0.98321	0.31085	0.01805	-0.00013		2	115	0.02242	59	0.957	2	94	55
TpIntW	Catalpa speciosa	CASP	dbh	crown dia	meters	1	loglogw1	-0.36961	1.90158	0.03479			1.24	12.85	0.18653	59	0.856	1.5	18.5	57
TpIntW	Catalpa speciosa	CASP	dbh	crown ht	meters	1/dbh	quad	1.16575	0.30181	-0.00127			2.01	18.72	0.1469	59	0.871	1.9	24	56
TpIntW	Catalpa speciosa	CASP	cdia	dbh	meters	1	loglogw1	1.15718	3.34649	0.07115			2.72	103.44	0.26674	59	0.882	2.5	139.7	57
TpIntW	Catalpa speciosa	CASP	age	dbh	centimeters	1	loglogw1	0.73449	2.4836	0.06565			2.83	101.83	0.25622	59	0.891	2.5	139.7	57
TpIntW	Catalpa speciosa	CASP	dbh	leaf area	sq. meters	1	loglogw1	-1.25115	4.93571	0.1479			1.6	598.54	0.38458	54	0.909	1.5	1223.6	52
TpIntW	Catalpa speciosa	CASP	dbh	tree ht	meters	1/sqrt(dbh)	quad	1.97482	0.35397	-0.00153			2.97	22.11	1.38572	59	0.812	2	28	56
SacVal	Cedrus deodara	CEDE	dbh	age	years	1	loglogw1	-1.60213	3.82378	0.30389	0.09235		1	88	0.55126	60	0.865	4	92	58
SacVal	Cedrus deodara	CEDE	dbh	crown dia	meters	1/dbh	cub	0.5258	0.28597	-0.0022	1e-05		0.75	18.15	0.04818	61	0.94	1.5	30	57
SacVal	Cedrus deodara	CEDE	dbh	crown ht	meters	1/sqrt(dbh)	cub	-2.38474	0.62219	-0.00525	2e-05		0.37	22.47	0.94763	59	0.883	1.4	27.2	55
SacVal	Cedrus deodara	CEDE	cdia	dbh	meters	1/cdia	lin	-6.32322	5.5559				4.48	101.69	9.85318	61	0.92	6.2	135.6	59
SacVal	Cedrus deodara	CEDE	age	dbh	centimeters	1	loglogw1	0.60029	2.65795	0.0611562			0.77	100.42	0.2473	60	0.882	6.2	135.6	58
SacVal	Cedrus deodara	CEDE	dbh	leaf area	sq. meters	1	loglogw1	-2.33574	5.74921	0.25962			0.01	750.89	0.50953	53	0.842	3	1132.7	51
SacVal	Cedrus deodara	CEDE	dbh	tree ht	meters	1/sqrt(dbh)	quad	-1.01371	0.53995	-0.00265			0.33	26.45	1.0949	59	0.896	1.8	30.2	56
SoCalC	Cedrus deodara	CEDE	dbh	age	years	1/dbh	quad	0.55334	0.6859	-0.00274			0	50	0.51184	26	0.92	1	50	23
SoCalC	Cedrus deodara	CEDE	dbh	crown dia	meters	1/dbh^2	quad	1.06017	0.24149	-0.00075			1.28	18.68	0.001	26	0.963	1.7	20	23
SoCalC	Cedrus deodara	CEDE	dbh	crown ht	meters	1	loglogw1	0.46811	1.42625	0.08132			0.95	14.81	0.28517	26	0.704	2.7	20	24
SoCalC	Cedrus deodara	CEDE	cdia	dbh	meters	1/cdia^2	loglogw4	1.00866	3.25997	0.00033			2.37	111.88	0.01805	26	0.993	2.5	125	24
SoCalC	Cedrus deodara	CEDE	age	dbh	centimeters	1/age^2	quad	0.92345	1.42681	0.01585			0.92	111.88	0.27082	27	0.905	2.5	125	24
SoCalC	Cedrus deodara	CEDE	dbh	leaf area	sq. meters	1/dbh^2	cub	11.9003	-0.022	0.17187	-0.00093		12.03	854.3	3.21682	21	0.87	12.5	900	17
SoCalC	Cedrus deodara	CEDE	dbh	tree ht	meters	1	loglogw1	0.43343	1.64844	0.05391			0.82	20.15	0.23218	26	0.829	2.7	25	24
GulfCo	Celtis laevigata	CELA	dbh	age	years	1/dbh	quad	-1.52508	0.81167	-0.00312			0	41	1.23315	37	0.85	0	50	34
GulfCo	Celtis laevigata	CELA	dbh	crown dia	meters	1/dbh^2	cub	-0.8392	0.50231	-0.007	4e-05		0.62	12.5	0.00601	37	0.856	0.8	19	33
GulfCo	Celtis laevigata	CELA	dbh	crown ht	meters	1	lin	3.63189	0.09914				3.93	10.05	4.31704	36	0.539	0.5	13	34
GulfCo	Celtis laevigata	CELA	cdia	dbh	meters	1/cdia^2	lin	0.15848	4.28057				3.04	64.74	1.70434	37	0.869	3	103.6	35
GulfCo	Celtis laevigata	CELA	age	dbh	centimeters	1/age^2	cub	3.03874	0.92424	0.06529	-0.00125		3.04	64.74	0.21129	37	0.909	3	103.6	33
GulfCo	Celtis laevigata	CELA	dbh	leaf area	sq. meters	1	loglogw1	-5.55956	7.7096	1.58174			1.6	660.72	1.25767	28	0.63	0	653.2	26
GulfCo	Celtis laevigata	CELA	dbh	tree ht	meters	1	cub	1.19032	0.50228	-0.00826	5e-05		2.64	12.01	5.89407	37	0.571	1	16.5	33
LoMidW	Celtis occidentalis	CEOC	dbh	age	years	1/dbh	cub	0.55158	0.53303	0.01189	-9e-05		0	100	1.49287	67	0.935	0	92	63
LoMidW	Celtis occidentalis	CEOC	dbh	crown dia	meters	1/dbh	cub	0.21272	0.3833	-0.00301	1e-05		1.28	17.34	0.04766	66	0.957	1.1	22.6	62
LoMidW	Celtis occidentalis	CEOC	dbh	crown ht	meters	1/sqrt(dbh)	quad	1.65026	0.33343	-0.00153			2.58	18.69	0.57839	66	0.91	2.5	23.5	63
LoMidW	Celtis occidentalis	CEOC	cdia	dbh	meters	1/cdia^2	cub	5.12976	-0.8643	0.55702	-0.01461		2.84	116.09	0.45119	66	0.958	2.9	115	62
LoMidW	Celtis occidentalis	CEOC	age	dbh	centimeters	1/age^2	lin	2.83867	1.1325				2.84	82.11	0.09167	67	0.931	2.9	115	65
LoMidW	Celtis occidentalis	CEOC	dbh	leaf area	sq. meters	1	loglogw1	-1.81944	6.06763	0.14157			1.34	1472.3	0.37626	63	0.946	1.9	2445.6	61
LoMidW	Celtis occidentalis	CEOC	dbh	tree ht	meters	1/sqrt(dbh)	cub	1.8919	0.51947	-0.00504	2e-05		3.33	21.58	0.44638	66	0.942	4	28.5	62
MidWst	Celtis occidentalis	CEOC	dbh	age	years	1/dbh	cub	-2.71962	0.90306	-0.01277	0.0001		0	52	0.10249	49	0.987	0	56	45
MidWst	Celtis occidentalis	CEOC	dbh	crown dia	meters	1/dbh	cub	-0.07797	0.4198	-0.00447	2e-05		1.36	18.8	0.04691	49	0.963	1.2	22.1	45
MidWst	Celtis occidentalis	CEOC	dbh	crown ht	meters	1/dbh	cub	0.11329	0.42387	-0.00613	4e-05		1.54	16.09	0.08312	49	0.907	1	20.5	45
MidWst	Celtis occidentalis	CEOC	cdia	dbh	meters	1/cdia^2	cub	3.819	-0.37727	0.54082	-0.01523		3.55	92.48	0.53727	49	0.95	3	101.1	45
MidWst	Celtis occidentalis	CEOC	age	dbh	centimeters	1/sqrt(age)	cub	3.54797	1.18435	0.0522	-0.00081		3.55	92.48	4.1289	49	0.989	3	101.1	45
MidWst	Celtis occidentalis	CEOC	dbh	leaf area	sq. meters	1	loglogw1	-5.43034	8.11336	0.21848			0.22	1134.12	0.46742	49	0.967	0.1	1843.8	47
MidWst	Celtis occidentalis	CEOC	dbh	tree ht	meters	1/dbh	cub	1.27137	0.53445	-0.00705	4e-05		3.08	23.88	0.11077	49	0.936	2.5	29	45
NMtnPr	Celtis occidentalis	CEOC	dbh	age	years	1/dbh	cub	0.55158	0.53303	0.01189	-9e-05		0	100	1.49287	67	0.935	0	92	63
NMtnPr	Celtis occidentalis	CEOC	dbh	crown dia	meters	1/dbh	cub	0.21272	0.3833	-0.00301	1e-05		1.28	20.94	0.04766	66	0.957	1.1	22.6	62
NMtnPr	Celtis occidentalis	CEOC	dbh	crown ht	meters	1/sqrt(dbh)	quad	1.65026	0.33343	-0.00153			2.58	19.77	0.57839	66	0.91	2.5	23.5	63
NMtnPr	Celtis occidentalis	CEOC	cdia	dbh	meters	1/cdia^2	cub	5.12976	-0.8643	0.55702	-0.01461		2.84	100	0.45119	66	0.958	2.9	115	62
NMtnPr	Celtis occidentalis	CEOC	age	dbh	centimeters	1/age^2	lin	2.83867	1.1325				2.84	116.09	0.09167	67	0.931	2.9	115	65
NMtnPr	Celtis occidentalis	CEOC	dbh	leaf area	sq. meters	1	loglogw1	-1.81944	6.06763	0.14157			1.34	2300.33	0.37626	63	0.946	1.9	2445.6	61
NMtnPr	Celtis occidentalis	CEOC	dbh	tree ht	meters	1/sqrt(dbh)	cub	1.8919	0.51947	-0.00504	2e-05		3.33	25.39	0.44638	66	0.942	4	28.5	62
SacVal	Celtis occidentalis	CEOC	dbh	age	years	1/dbh^2	lin	-0.84351	0.7832				1	77	0.04246	37	0.912	1	66	35
SacVal	Celtis occidentalis	CEOC	dbh	crown dia	meters	1	loglogw1	-0.40489	2.1918	0.04639			1.06	16.08	0.21539	37	0.898	0.8	24.2	35
SacVal	Celtis occidentalis	CEOC	dbh	crown ht	meters	1/dbh^2	lin	1.50507	0.18403				1.94	14.21	0.00375	36	0.865	1.9	17.2	34
SacVal	Celtis occidentalis	CEOC	cdia	dbh	meters	1	loglogw1	1.41616	2.42584	0.09906			2.36	69.02	0.31474	37	0.859	2	94.6	35
SacVal	Celtis occidentalis	CEOC	age	dbh	centimeters	1/age^2	quad	0.59486	1.77385	-0.0115			2.36	69.02	0.09459	37	0.94	2	94.6	34
SacVal	Celtis occidentalis	CEOC	dbh	leaf area	sq. meters	1	loglogw1	-1.99866	5.66181	0.3524			0.86	615.24	0.59364	35	0.89	0.2	1118.3	33
SacVal	Celtis occidentalis	CEOC	dbh	tree ht	meters	1/dbh	quad	2.59923	0.27032	-0.00124			3.23	15.33	0.11297	36	0.865	2.8	21.8	33
InlVal	Celtis sinensis	CESI4	dbh	age	years	1/dbh	quad	-2.50991	0.96783	-0.00548			1	70	1.20444	30	0.853	0	55	27
InlVal	Celtis sinensis	CESI4	dbh	crown dia	meters	1/(dbh)^2	loglogw4	-0.96824	2.60965	1e-05			0.69	16.4	0.00287	30	0.998	0.7	21.9	28
InlVal	Celtis sinensis	CESI4	dbh	crown ht	meters	1/(dbh)^2	loglogw4	-1.11779	2.59242	2e-05			0.59	14.25	0.00488	30	0.994	0.6	18	28
InlVal	Celtis sinensis	CESI4	cdia	dbh	meters	1/(cdia)^2	loglogw4	2.06657	1.79145	0.00033			0.69	16.4	0.01819	30	0.956	2.5	82.5	28
InlVal	Celtis sinensis	CESI4	age	dbh	centimeters	1/age^2	quad	2.5184	2.16011	-0.01839			2.52	65.95	0.16058	30	0.935	2.5	82.5	27
InlVal	Celtis sinensis	CESI4	dbh	leaf area	sq. meters	1/(dbh)^2	loglogw4	-0.29449	4.61852	6e-05			2.15	645.89	0.00781	28	0.995	2.2	1280.7	26
InlVal	Celtis sinensis	CESI4	dbh	tree ht	meters	1/(dbh)^2	loglogw4	0.16259	1.81586	1e-05			1.8	16.4	0.00365	30	0.993	1.8	22	28
SacVal	Celtis sinensis	CESI4	dbh	age	years	1/dbh^2	lin	-1.02931	0.7272				1	82	0.04494	59	0.891	1	89	57
SacVal	Celtis sinensis	CESI4	dbh	crown dia	meters	1/dbh	cub	1.11854	0.37584	-0.00285	1e-05		2.29	21.72	0.07333	59	0.934	1.8	26	55
SacVal	Celtis sinensis	CESI4	dbh	crown ht	meters	1/sqrt(dbh)	lin	2.79745	0.13252				3.22	17.95	0.90626	59	0.733	0.8	21.4	57
SacVal	Celtis sinensis	CESI4	cdia	dbh	meters	1/cdia^2	quad	-2.07328	2.4363	0.10223			3.2	114.37	0.63201	59	0.918	2.2	142	56
SacVal	Celtis sinensis	CESI4	age	dbh	centimeters	1/age	cub	0.83516	2.40233	-0.04183	0.00036		3.2	114.37	3.25426	59	0.916	2.2	142	55
SacVal	Celtis sinensis	CESI4	dbh	leaf area	sq. meters	1	loglogw1	-2.1349	5.80867	0.21015			1.45	1142.2	0.45842	57	0.866	2.9	1485	55
SacVal	Celtis sinensis	CESI4	dbh	tree ht	meters	1/sqrt(dbh)	lin	4.2474	0.15487				4.74	21.96	1.12048	59	0.752	2.8	29.2	57
SoCalC	Ceratonia siliqua	CESI3	dbh	age	years	1	cub	-5.52296	2.144	-0.036	0.00021		0	55	19.2978	29	0.822	0	50	25
SoCalC	Ceratonia siliqua	CESI3	dbh	crown dia	meters	1	loglogw1	-1.12431	2.46165	0.02272			0.59	13.03	0.15073	29	0.938	0.5	13	27
SoCalC	Ceratonia siliqua	CESI3	dbh	crown ht	meters	1	loglogw1	-1.27595	2.11902	0.10619			0.5	6.83	0.32587	29	0.705	0.4	9	27
SoCalC	Ceratonia siliqua	CESI3	cdia	dbh	meters	1/cdia^2	quad	0.84527	3.19166	0.20995			3.06	86.24	1.39382	29	0.929	2.5	90	26
SoCalC	Ceratonia siliqua	CESI3	age	dbh	centimeters	1/age^2	quad	2.53495	0.50529	0.01848			2.53	86.24	0.08917	30	0.93	2.5	90	27
SoCalC	Ceratonia siliqua	CESI3	dbh	leaf area	sq. meters	1/dbh	loglogw3	-2.17205	5.23053	0.00542			0.39	362.14	0.0736	29	0.979	0.4	493.6	27
SoCalC	Ceratonia siliqua	CESI3	dbh	tree ht	meters	1	loglogw1	-0.21866	1.74001	0.02071			1.22	10.92	0.14391	29	0.893	1.2	11.5	27
LoMidW	Cercis canadensis	CECA	dbh	age	years	1/dbh^2	expow4	1.2445	0.0652	3e-05			4	70	0.00557	16	0.987	4	55	14
LoMidW	Cercis canadensis	CECA	dbh	crown dia	meters	1/dbh	cub	0.39722	0.42905	-0.0074	4e-05		1.46	9.52	0.03019	33	0.92	1.6	12.6	29
LoMidW	Cercis canadensis	CECA	dbh	crown ht	meters	1/dbh	loglogw3	0.05906	1.26725	0.0021			1.46	7.35	0.04583	33	0.863	1.5	10.5	31
LoMidW	Cercis canadensis	CECA	cdia	dbh	meters	1	loglogw1	1.04119	3.2403	0.1176			2.6	75	0.34293	33	0.795	2.8	75.4	31
LoMidW	Cercis canadensis	CECA	age	dbh	centimeters	1/age^2	cub	-8.59751	3.09997	-0.07802	0.00073		2.6	75	0.00397	16	0.992	2.8	75.4	12
LoMidW	Cercis canadensis	CECA	dbh	leaf area	sq. meters	1	loglogw1	-1.02131	4.61102	0.41795			2.26	385.49	0.64649	31	0.768	0.7	343.7	29
LoMidW	Cercis canadensis	CECA	dbh	tree ht	meters	1/sqrt(dbh)	loglogw2	0.49306	1.15202	0.00872			2.19	9.2	0.09336	33	0.779	2.5	13	31
InterW	Chilopsis linearis	CHLI	dbh	age	years	1	expow1	1.1441	0.06862	0.15215			0	40	0.39006	30	0.608	3	23	28
InterW	Chilopsis linearis	CHLI	dbh	crown dia	meters	1/dbh^2	lin	1.21982	0.2111				2.13	9.98	0.00201	30	0.856	1.8	8.6	28
InterW	Chilopsis linearis	CHLI	dbh	crown ht	meters	1	loglogw1	-0.08544	1.14037	0.09229			1.7	4.2	0.30379	30	0.344	1	5	28
InterW	Chilopsis linearis	CHLI	cdia	dbh	meters	1	loglogw1	1.29849	2.66746	0.0562			4.3	41.49	0.23706	30	0.797	2.8	35.6	28
InterW	Chilopsis linearis	CHLI	age	dbh	centimeters	1/age	lin	4.29705	0.92975				4.3	41.49	1.75474	30	0.59	2.8	35.6	28
InterW	Chilopsis linearis	CHLI	dbh	leaf area	sq. meters	1	loglogw1	-5.04429	6.15051	0.5091			0.36	28.38	0.71351	29	0.669	0.1	22.1	27
InterW	Chilopsis linearis	CHLI	dbh	tree ht	meters	1	expow1	0.86018	0.03567	0.0631			2.84	10.71	0.2512	30	0.499	1.6	8	28
SWDsrt	Chilopsis linearis	CHLI	dbh	age	years	1	quad	1.64086	1.27832	-0.01913			0	53	25.5952	34	0.504	0	24	31
SWDsrt	Chilopsis linearis	CHLI	dbh	crown dia	meters	1/dbh	lin	0.56745	0.25862				1.23	14.52	0.03046	34	0.942	1	12	32
SWDsrt	Chilopsis linearis	CHLI	dbh	crown ht	meters	1/dbh	loglogw3	-0.41406	1.60308	0.00615			0.97	7.22	0.0784	34	0.812	1	11.1	32
SWDsrt	Chilopsis linearis	CHLI	cdia	dbh	meters	1/cdia^2	lin	-1.26689	3.70361				3.51	35	0.3061	34	0.947	2.5	41.4	32
SWDsrt	Chilopsis linearis	CHLI	age	dbh	centimeters	1/age	lin	2.54375	0.96983				2.54	53.94	3.33158	34	0.824	2.5	41.4	32
SWDsrt	Chilopsis linearis	CHLI	dbh	leaf area	sq. meters	1/sqrt(dbh)	loglogw2	-0.27622	3.47405	0.17871			1.98	181.57	0.42274	34	0.649	0.9	239.3	32
SWDsrt	Chilopsis linearis	CHLI	dbh	tree ht	meters	1	loglogw1	-0.07766	1.68466	0.04283			1.41	9.67	0.20696	34	0.819	1.2	12.7	32
CenFla	Cinnamomum camphora	CICA	dbh	age	years	1/dbh	lin	1.69357	0.40906				1	95	0.78467	58	0.878	1	72	56
CenFla	Cinnamomum camphora	CICA	dbh	crown dia	meters	1/dbh	quad	0.64978	0.2614	-0.00095			1.16	18.72	0.11378	63	0.878	1.5	23.8	60
CenFla	Cinnamomum camphora	CICA	dbh	crown ht	meters	1/sqrt(dbh)	cub	1.01405	0.26806	-0.00275	1e-05		1.53	13.59	0.74377	63	0.633	1	16	59
CenFla	Cinnamomum camphora	CICA	cdia	dbh	meters	1	loglogw1	1.55478	2.73094	0.10762			1.96	150.7	0.32806	63	0.842	4.8	150.6	61
CenFla	Cinnamomum camphora	CICA	age	dbh	centimeters	1/age	quad	-0.87708	2.85059	-0.01321			1.96	150.7	8.4086	58	0.9	4.8	150.6	55
CenFla	Cinnamomum camphora	CICA	dbh	leaf area	sq. meters	1	loglogw1	-2.82649	6.13761	0.38432			0.27	1438.7	0.61993	57	0.803	1.3	1679.4	55
CenFla	Cinnamomum camphora	CICA	dbh	tree ht	meters	1	cub	2.53889	0.34177	-0.00365	1e-05		3.19	18.22	7.71877	63	0.536	2	18.5	59
InlEmp	Cinnamomum camphora	CICA	dbh	age	years	1/dbh^2	quad	-1.03228	0.46251	0.00526			1	125	0.01546	57	0.962	0	95	54
InlEmp	Cinnamomum camphora	CICA	dbh	crown dia	meters	1/dbh	quad	2.3066	0.21129	-0.00067			3.22	19	0.06181	57	0.9	2.8	18.6	54
InlEmp	Cinnamomum camphora	CICA	dbh	crown ht	meters	1/dbh	quad	1.78954	0.16717	-0.00054			2.17	14.63	0.06755	57	0.836	2	15	54
InlEmp	Cinnamomum camphora	CICA	cdia	dbh	meters	1/cdia^2	lin	-11.6899	5.6092				4.37	90	1.06555	57	0.866	2.3	104.3	55
InlEmp	Cinnamomum camphora	CICA	age	dbh	centimeters	1/age	cub	2.27682	2.12158	-0.02701	0.00016		2.28	160.68	1.15781	57	0.978	2.3	104.3	53
InlEmp	Cinnamomum camphora	CICA	dbh	leaf area	sq. meters	1	loglogw1	0.90498	3.56529	0.45187			19.75	1022.07	0.20418	28	0.738	7.5	1512.9	26
InlEmp	Cinnamomum camphora	CICA	dbh	tree ht	meters	1/dbh	quad	2.96218	0.22698	-0.00068			3.48	21.84	0.05906	57	0.918	3.5	20	54
InlVal	Cinnamomum camphora	CICA	dbh	age	years	1/dbh	lin	-0.68256	0.77821				1	122	2.61513	33	0.808	0	100	31
InlVal	Cinnamomum camphora	CICA	dbh	crown dia	meters	1/dbh	quad	0.42322	0.25774	-0.00051			1.07	20.42	0.02985	33	0.968	1	22.2	30
InlVal	Cinnamomum camphora	CICA	dbh	crown ht	meters	1/sqrt(dbh)	loglogw2	-0.78021	2.14885	0.01352			0.76	12.82	0.11626	33	0.902	0.9	18.5	31
InlVal	Cinnamomum camphora	CICA	cdia	dbh	meters	1/cdia^2	lin	-1.87648	4.29076				1.07	20.42	0.36129	33	0.963	2.5	104	31
InlVal	Cinnamomum camphora	CICA	age	dbh	centimeters	1/age^2	quad	2.52476	1.52318	-0.00624			2.52	95.47	0.21686	33	0.883	2.5	104	30
InlVal	Cinnamomum camphora	CICA	dbh	leaf area	sq. meters	1/dbh^2	quad	0.88728	0.06831	0.12893			1.88	1182.54	3.14444	33	0.901	1.7	1512.9	30
InlVal	Cinnamomum camphora	CICA	dbh	tree ht	meters	1/(dbh)^2	loglogw4	0.35146	1.43974	5e-05			1.98	15.56	0.00671	33	0.976	2	21.5	31
NoCalC	Cinnamomum camphora	CICA	dbh	age	years	1	quad	-4.02378	1.77648	-0.00804			0	110	53.5794	70	0.907	0	103	67
NoCalC	Cinnamomum camphora	CICA	dbh	crown dia	meters	1/dbh^2	quad	0.27422	0.27039	-0.00112			1.03	16.23	0.00107	69	0.964	1.1	17.3	66
NoCalC	Cinnamomum camphora	CICA	dbh	crown ht	meters	1/dbh	quad	1.37819	0.11341	-0.00055			1.7	7.2	0.05733	69	0.672	1.2	11.4	66
NoCalC	Cinnamomum camphora	CICA	cdia	dbh	meters	1	loglogw1	1.75966	2.46286	0.04574			2.84	80	0.21387	69	0.9	2.9	112.3	67
NoCalC	Cinnamomum camphora	CICA	age	dbh	centimeters	1/age	quad	2.84131	0.57502	0.00312			2.84	103.88	1.24802	70	0.97	2.9	112.3	67
NoCalC	Cinnamomum camphora	CICA	dbh	leaf area	sq. meters	1	loglogw1	-1.51267	4.94387	0.33528			1.71	525.01	0.57903	57	0.794	2	1183.4	55
NoCalC	Cinnamomum camphora	CICA	dbh	tree ht	meters	1/sqrt(dbh)	quad	2.54056	0.21062	-0.00102			3.13	13.43	0.4109	69	0.792	2.5	16.6	66
SacVal	Cinnamomum camphora	CICA	dbh	age	years	1/dbh^2	lin	-1.99343	0.65859				0	113	0.02582	61	0.922	0.1	102	59
SacVal	Cinnamomum camphora	CICA	dbh	crown dia	meters	1/dbh^2	cub	0.40772	0.30821	-0.00202	1e-05		1.3	24.96	0.00115	61	0.964	1.2	28.3	57
SacVal	Cinnamomum camphora	CICA	dbh	crown ht	meters	1/dbh	quad	1.30265	0.22261	-0.00071			1.96	18.3	0.13862	61	0.848	1.2	27	58
SacVal	Cinnamomum camphora	CICA	cdia	dbh	meters	1	loglogw1	1.30469	2.89706	0.04419			2.96	133.79	0.21021	61	0.943	3.1	135.8	59
SacVal	Cinnamomum camphora	CICA	age	dbh	centimeters	1/age^2	quad	2.9586	1.90342	-0.0066			2.96	133.79	0.16782	61	0.937	3.1	135.8	58
SacVal	Cinnamomum camphora	CICA	dbh	leaf area	sq. meters	1	loglogw1	-2.43827	5.96978	0.14195			0.79	1260.72	0.37677	53	0.914	7.9	1844.7	51
SacVal	Cinnamomum camphora	CICA	dbh	tree ht	meters	1/dbh	quad	2.0156	0.28138	-0.00106			2.84	20.68	0.16536	61	0.864	3	30	58
SoCalC	Cinnamomum camphora	CICA	dbh	age	years	1/sqrt(dbh)	lin	1.79341	0.64811				0	85	6.46355	29	0.865	0	70	27
SoCalC	Cinnamomum camphora	CICA	dbh	crown dia	meters	1/dbh^2	quad	0.82584	0.26812	-0.00117			1.5	16.16	0.00116	29	0.96	1.5	16.5	26
SoCalC	Cinnamomum camphora	CICA	dbh	crown ht	meters	1/sqrt(dbh)	loglogw2	-0.28267	1.55446	0.01352			1.09	9.16	0.11627	29	0.806	1	11	27
SoCalC	Cinnamomum camphora	CICA	cdia	dbh	meters	1/cdia	loglogw3	1.17901	2.97972	0.00452			2.53	75	0.06723	29	0.971	2.5	90	27
SoCalC	Cinnamomum camphora	CICA	age	dbh	centimeters	1/age^2	lin	2.52669	1.33056				2.53	115.62	0.12466	29	0.929	2.5	90	27
SoCalC	Cinnamomum camphora	CICA	dbh	leaf area	sq. meters	1	loglogw1	-1.07155	4.5587	0.23591			1.48	469.55	0.48571	29	0.854	1.3	413.6	27
SoCalC	Cinnamomum camphora	CICA	dbh	tree ht	meters	1/sqrt(dbh)	loglogw2	0.30887	1.48301	0.00397			1.93	14.07	0.06299	29	0.928	2	17.5	27
Tropic	Citharexylum spinosum	CISP2	dbh	age	years	1	loglogw1	-2.42965	4.71254	0.21484			0	58	0.46351	35	0.849	0.1	46	33
Tropic	Citharexylum spinosum	CISP2	dbh	crown dia	meters	1/dbh	quad	0.70246	0.30233	-0.00219			1.36	11.12	0.08481	35	0.815	0.9	13.2	32
Tropic	Citharexylum spinosum	CISP2	dbh	crown ht	meters	1/sqrt(dbh)	lin	2.06503	0.14443				2.38	12.23	0.57061	31	0.528	1	10.5	29
Tropic	Citharexylum spinosum	CISP2	cdia	dbh	meters	1/sqrt(cdia)	lin	-1.04702	4.03202				2.19	70.4	21.2256	35	0.725	2.5	63.5	33
Tropic	Citharexylum spinosum	CISP2	age	dbh	centimeters	1/age	cub	2.19465	2.1309	-0.07159	0.00095		2.19	70.4	2.34266	35	0.88	2.5	63.5	31
Tropic	Citharexylum spinosum	CISP2	dbh	leaf area	sq. meters	1	loglogw1	-1.97391	5.26654	0.50881			0.87	393	0.71331	30	0.753	0.7	342.1	28
Tropic	Citharexylum spinosum	CISP2	dbh	tree ht	meters	1	loglogw1	0.49875	1.4384	0.05038			2.11	13.39	0.22445	31	0.686	2	12.5	29
Tropic	Conocarpus erectus var. argenteus	COERA2	dbh	age	years	1	quad	5.32692	0.8348	-0.00498			1	48	26.1008	37	0.809	0.1	45	34
Tropic	Conocarpus erectus var. argenteus	COERA2	dbh	crown dia	meters	1/dbh	quad	0.7818	0.19403	-0.00085			1.16	11.25	0.0703	35	0.838	1	14.3	32
Tropic	Conocarpus erectus var. argenteus	COERA2	dbh	crown ht	meters	1/dbh	lin	0.78033	0.06601				0.91	6.6	0.04791	34	0.623	0.5	8.5	32
Tropic	Conocarpus erectus var. argenteus	COERA2	cdia	dbh	meters	1	loglogw1	1.85857	2.51749	0.39338			2.44	88.1	0.15475	35	0.818	2	89.7	33
Tropic	Conocarpus erectus var. argenteus	COERA2	age	dbh	centimeters	1/age^2	quad	1.95348	0.46074	0.02779			1.95	88.1	0.22095	37	0.865	2	89.7	34
Tropic	Conocarpus erectus var. argenteus	COERA2	dbh	leaf area	sq. meters	1	loglogw1	-3.68156	5.55538	1.68407			0.96	245.3	1.29772	33	0.627	0.2	184.4	31
Tropic	Conocarpus erectus var. argenteus	COERA2	dbh	tree ht	meters	1/sqrt(dbh)	loglogw2	-0.08258	1.38862	0.02219			1.04	8.22	0.14896	34	0.734	1	12	32
Tropic	Cordia subcordata	COSU2	dbh	age	years	1/dbh^2	quad	-1.70704	1.15914	-0.00808			0	67	0.07256	33	0.874	0.1	55	30
Tropic	Cordia subcordata	COSU2	dbh	crown dia	meters	1/dbh	lin	0.56177	0.19461				1.01	10.13	0.07324	33	0.849	0.6	12.2	31
Tropic	Cordia subcordata	COSU2	dbh	crown ht	meters	1/dbh	lin	0.53379	0.138				0.85	7.32	0.06122	33	0.771	0.5	9.5	31
Tropic	Cordia subcordata	COSU2	cdia	dbh	meters	1	lin	1.63501	4.31848				2.29	38	44.2569	33	0.753	1.8	60.2	31
Tropic	Cordia subcordata	COSU2	age	dbh	centimeters	1/sqrt(age)	quad	2.28654	1.39468	-0.01038			2.29	49.15	15.8727	33	0.759	1.8	60.2	30
Tropic	Cordia subcordata	COSU2	dbh	leaf area	sq. meters	1	loglogw1	-3.98559	6.55722	1.16459			0.79	253.81	1.07916	29	0.734	0.1	252.1	27
Tropic	Cordia subcordata	COSU2	dbh	tree ht	meters	1/sqrt(dbh)	lin	1.74017	0.18522				2.16	10.84	0.35302	33	0.805	1	11.5	31
GulfCo	Cornus florida	COFL	dbh	age	years	1/dbh^2	lin	-0.67522	1.02936				1	51	0.10846	34	0.749	3	45	32
GulfCo	Cornus florida	COFL	dbh	crown dia	meters	1/sqrt(dbh)	quad	0.21538	0.41554	-0.00536			0.82	8.17	0.36191	34	0.652	1.3	11.1	31
GulfCo	Cornus florida	COFL	dbh	crown ht	meters	1	quad	0.73087	0.28223	-0.00391			1.14	5.82	2.05648	33	0.281	0.5	8.5	30
GulfCo	Cornus florida	COFL	cdia	dbh	meters	1	loglogw1	1.71264	1.92446	0.10013			1.39	35.34	0.31643	34	0.617	3.8	47.5	32
GulfCo	Cornus florida	COFL	age	dbh	centimeters	1	loglogw1	0.96778	1.85836	0.08767			1.49	34.53	0.29609	34	0.665	3.8	47.5	32
GulfCo	Cornus florida	COFL	dbh	leaf area	sq. meters	1	loglogw1	-5.57391	6.74063	1.57914			0.14	77.57	1.25664	28	0.504	0	95	26
GulfCo	Cornus florida	COFL	dbh	tree ht	meters	1	quad	2.25488	0.31929	-0.00442			2.72	8.01	2.29861	33	0.314	2.5	10	30
Piedmt	Cornus florida	COFL	dbh	age	years	1/dbh	lin	2.44657	0.50578				2	30	0.26388	33	0.918	2	27	31
Piedmt	Cornus florida	COFL	dbh	crown dia	meters	1/sqrt(dbh)	quad	1.23571	0.31119	-0.00233			1.68	11.1	0.33639	33	0.84	1.1	12.6	30
Piedmt	Cornus florida	COFL	dbh	crown ht	meters	1/dbh	lin	2.10385	0.11917				2.28	8.25	0.08203	33	0.665	1	11	31
Piedmt	Cornus florida	COFL	cdia	dbh	meters	1/cdia	lin	-3.92145	4.00089				1.44	51.61	5.53859	33	0.821	1.3	49	31
Piedmt	Cornus florida	COFL	age	dbh	centimeters	1/age	lin	-2.14081	1.79176				1.44	51.61	1.37976	33	0.907	1.3	49	31
Piedmt	Cornus florida	COFL	dbh	leaf area	sq. meters	1	loglogw1	-2.46735	4.94153	0.93059			0.39	132.38	0.96467	31	0.722	0	175.8	29
Piedmt	Cornus florida	COFL	dbh	tree ht	meters	1/dbh	loglogw3	0.8693	0.90913	0.00214			2.16	8.81	0.04628	33	0.912	2	11	31
TpIntW	Crataegus spp.	CR	dbh	age	years	1/dbh	cub	9.03631	-0.84965	0.08056	-0.00084		3	70	1.21966	33	0.916	3	65	29
TpIntW	Crataegus spp.	CR	dbh	crown dia	meters	1/dbh	cub	-0.68641	0.68317	-0.02041	0.00023		0.6	9.69	0.04098	32	0.883	1.6	16	28
TpIntW	Crataegus spp.	CR	dbh	crown ht	meters	1/sqrt(dbh)	lin	1.97855	0.1279				2.24	7.78	0.27387	33	0.696	1.5	12	31
TpIntW	Crataegus spp.	CR	cdia	dbh	meters	1/cdia^2	cub	6.80186	-3.50745	1.32424	-0.05889		3.26	45.39	0.62621	32	0.892	4.6	56.4	28
TpIntW	Crataegus spp.	CR	age	dbh	centimeters	1/age	quad	-0.56542	1.3042	-0.00925			2.01	45.39	0.50624	33	0.94	4.6	56.4	30
TpIntW	Crataegus spp.	CR	dbh	leaf area	sq. meters	1/sqrt(dbh)	loglogw2	-0.18463	4.03588	0.05876			1.28	230.56	0.2424	32	0.775	5.2	828.3	30
TpIntW	Crataegus spp.	CR	dbh	tree ht	meters	1	lin	3.49346	0.13679				3.77	9.7	1.37831	33	0.692	3	12.5	31
PacfNW	Crataegus x lavallei	CRLA	dbh	age	years	1	loglogw1	0.66848	2.26341	0.21909			2	48	0.46807	74	0.919	1	47	72
PacfNW	Crataegus x lavallei	CRLA	dbh	crown dia	meters	1/dbh	quad	0.17454	0.40208	-0.00444			0.92	9.06	0.02333	74	0.974	0.4	10.7	71
PacfNW	Crataegus x lavallei	CRLA	dbh	crown ht	meters	1/sqrt(dbh)	quad	0.93095	0.25848	-0.0016			1.42	8.47	0.28217	74	0.845	1	11	71
PacfNW	Crataegus x lavallei	CRLA	cdia	dbh	meters	1/cdia^2	cub	1.02603	-0.06687	0.77348	-0.03728		1.9	38.23	0.42216	74	0.962	0.9	52	70
PacfNW	Crataegus x lavallei	CRLA	age	dbh	centimeters	1/age^2	cub	0.20544	0.81745	0.01594	-0.00034		1.9	38.23	0.04075	74	0.947	0.9	52	70
PacfNW	Crataegus x lavallei	CRLA	dbh	leaf area	sq. meters	1/dbh^2	cub	1.26793	-1.41462	0.39699	-0.00419		0.32	293.54	3.24851	74	0.918	0	470.6	70
PacfNW	Crataegus x lavallei	CRLA	dbh	tree ht	meters	1/sqrt(dbh)	quad	1.88852	0.33423	-0.00252			2.51	10.99	0.25145	74	0.898	2	13	71
SoCalC	Cupaniopsis anacardioides	CUAN	dbh	age	years	1	loglogw1	-0.65356	3.15034	0.10758			0	75	0.32799	30	0.933	1	55	28
SoCalC	Cupaniopsis anacardioides	CUAN	dbh	crown dia	meters	1	loglogw1	-0.34737	1.92743	0.02662			0.51	10.47	0.16317	30	0.954	0.8	11	28
SoCalC	Cupaniopsis anacardioides	CUAN	dbh	crown ht	meters	1/sqrt(dbh)	lin	1.0575	0.11194				1.2	7.29	0.18952	30	0.799	0.5	8	28
SoCalC	Cupaniopsis anacardioides	CUAN	cdia	dbh	meters	1	loglogw1	1.56811	2.36783	0.0564			1.3	55.64	0.23748	30	0.943	2.1	55	28
SoCalC	Cupaniopsis anacardioides	CUAN	age	dbh	centimeters	1/age	quad	1.30481	1.3781	-0.00872			1.3	55.64	1.91633	31	0.902	2.1	55	28
SoCalC	Cupaniopsis anacardioides	CUAN	dbh	leaf area	sq. meters	1/dbh^2	quad	-0.03248	0.62085	0.07567			0.91	268.76	1.25704	29	0.829	0.3	250	26
SoCalC	Cupaniopsis anacardioides	CUAN	dbh	tree ht	meters	1/dbh	quad	2.19362	0.26965	-0.00226			2.54	10.19	0.0445	30	0.912	2.5	11	27
Tropic	Delonix regia	DERE	dbh	age	years	1	loglogw1	-1.70223	3.941	0.15647			0	85	0.39557	59	0.881	0.1	88	57
Tropic	Delonix regia	DERE	dbh	crown dia	meters	1/dbh	cub	-0.10588	0.40934	-0.00626	4e-05		0.55	11.95	0.10043	59	0.86	0.7	19.7	55
Tropic	Delonix regia	DERE	dbh	crown ht	meters	1/dbh	lin	0.86704	0.0565				0.96	4.92	0.04359	57	0.589	0.5	7	55
Tropic	Delonix regia	DERE	cdia	dbh	meters	1	loglogw1	1.84464	2.24328	0.37037			3.29	71.78	0.13718	59	0.791	1.7	101.9	57
Tropic	Delonix regia	DERE	age	dbh	centimeters	1/age	quad	1.64273	1.65829	-0.0098			1.64	71.78	3.97402	59	0.902	1.7	101.9	56
Tropic	Delonix regia	DERE	dbh	leaf area	sq. meters	1	loglogw1	-4.45008	6.32727	1.3446			0.27	293.58	1.15957	55	0.695	0	372.1	53
Tropic	Delonix regia	DERE	dbh	tree ht	meters	1	loglogw1	0.22609	1.22407	0.06299			1.26	7.52	0.25097	57	0.642	1.5	13	55
InterW	Elaeagnus angustifolia	ELAN	dbh	age	years	1/dbh	cub	-9.14599	1.9997	-0.03907	0.00025		0	85	1.22737	30	0.719	3	39	26
InterW	Elaeagnus angustifolia	ELAN	dbh	crown dia	meters	1/sqrt(dbh)	lin	2.39569	0.18355				2.7	17.22	0.25898	30	0.896	3.1	17	28
InterW	Elaeagnus angustifolia	ELAN	dbh	crown ht	meters	1/dbh	lin	2.17419	0.11933				2.37	11.81	0.04081	30	0.813	2.5	13	28
InterW	Elaeagnus angustifolia	ELAN	cdia	dbh	meters	1/cdia^2	lin	-8.29681	4.91511				4.3	80.63	0.48956	30	0.906	5.2	80.8	28
InterW	Elaeagnus angustifolia	ELAN	age	dbh	centimeters	1/sqrt(age)	loglogw2	1.23943	2.09658	0.03678			1.63	80.74	0.19177	30	0.765	5.2	80.8	28
InterW	Elaeagnus angustifolia	ELAN	dbh	leaf area	sq. meters	1	loglogw1	-5.98684	7.98921	0.38714			0.36	492.85	0.62221	30	0.874	1.1	503.7	28
InterW	Elaeagnus angustifolia	ELAN	dbh	tree ht	meters	1	loglogw1	-0.14852	1.7873	0.01978			0.83	12.24	0.14063	30	0.872	3	15	28
Tropic	Elaeodendron orientale	ELOR2	dbh	age	years	1	cub	-14.5493	4.47653	-0.12406	0.0011		0	70	29.8968	34	0.781	0.1	45	30
Tropic	Elaeodendron orientale	ELOR2	dbh	crown dia	meters	1/dbh	quad	0.43845	0.2185	-0.00094			0.96	10.24	0.02763	34	0.927	0.8	11.3	31
Tropic	Elaeodendron orientale	ELOR2	dbh	crown ht	meters	1/dbh	quad	0.08018	0.19049	-0.00154			0.53	5.99	0.02045	33	0.884	0.6	7.5	30
Tropic	Elaeodendron orientale	ELOR2	cdia	dbh	meters	1/cdia^2	lin	-1.94339	5.35112				3.25	58	0.99732	34	0.923	2.5	62.2	32
Tropic	Elaeodendron orientale	ELOR2	age	dbh	centimeters	1/age^2	lin	2.41656	0.83335				2.42	60.75	0.12576	34	0.837	2.5	62.2	32
Tropic	Elaeodendron orientale	ELOR2	dbh	leaf area	sq. meters	1	loglogw1	-3.95271	6.32454	0.34467			0.16	193.57	0.58708	32	0.882	0.4	241.2	30
Tropic	Elaeodendron orientale	ELOR2	dbh	tree ht	meters	1	loglogw1	-0.06189	1.70259	0.01645			1.35	10.52	0.12824	34	0.92	1.5	12	32
CenFla	Eriobotrya japonica	ERJA	dbh	age	years	1/dbh	lin	2.45205	0.38214				1	30	0.66744	30	0.637	2	23	28
CenFla	Eriobotrya japonica	ERJA	dbh	crown dia	meters	1/dbh	lin	0.83558	0.22941				1.23	13.42	0.04597	30	0.903	1	10	28
CenFla	Eriobotrya japonica	ERJA	dbh	crown ht	meters	1/dbh	lin	0.47577	0.14851				0.73	8.63	0.05376	30	0.768	0.5	9	28
CenFla	Eriobotrya japonica	ERJA	cdia	dbh	meters	1	loglogw1	1.5042	2.39219	0.06057			3.5	54.87	0.24612	30	0.892	1.5	43	28
CenFla	Eriobotrya japonica	ERJA	age	dbh	centimeters	1/age	lin	1.72609	1.77157				1.73	54.87	5.60377	30	0.609	1.5	43	28
CenFla	Eriobotrya japonica	ERJA	dbh	leaf area	sq. meters	1	loglogw1	-3.07252	6.13881	0.22352			0.88	281.8	0.47278	26	0.941	0.1	206.2	24
CenFla	Eriobotrya japonica	ERJA	dbh	tree ht	meters	1/dbh	quad	1.15555	0.28024	-0.00266			1.63	8.54	0.05599	30	0.838	1.5	11	27
SoCalC	Eucalyptus ficifolia	EUFI81	dbh	age	years	1	cub	-4.72264	1.8489	-0.02853	0.00016		0	55	11.5666	31	0.851	0	55	27
SoCalC	Eucalyptus ficifolia	EUFI81	dbh	crown dia	meters	1/dbh^2	cub	0.27156	0.29607	-0.00392	2e-05		1	17.92	0.00047	31	0.973	1	15.5	27
SoCalC	Eucalyptus ficifolia	EUFI81	dbh	crown ht	meters	1/dbh^2	lin	1.00138	0.08194				1.21	9.9	0.00103	31	0.839	1.2	12	29
SoCalC	Eucalyptus ficifolia	EUFI81	cdia	dbh	meters	1	loglogw1	1.8674	2.60813	0.03091			2.53	108.66	0.1758	31	0.924	2.5	100	29
SoCalC	Eucalyptus ficifolia	EUFI81	age	dbh	centimeters	1/age^2	quad	2.53379	0.62042	0.0238			2.53	108.66	0.08889	32	0.96	2.5	100	29
SoCalC	Eucalyptus ficifolia	EUFI81	dbh	leaf area	sq. meters	1/dbh^2	cub	-11.4866	5.39173	-0.12114	0.00136		1.42	883.58	1.86697	31	0.849	1.6	840	27
SoCalC	Eucalyptus ficifolia	EUFI81	dbh	tree ht	meters	1/dbh^2	loglogw4	0.10924	1.54013	1e-05			1.6	12.96	0.00345	31	0.988	1.6	16.5	29
NoCalC	Eucalyptus globulus	EUGL	dbh	age	years	1/dbh	cub	0.68131	0.45914	-0.00086	1e-05		0	88	0.57336	67	0.952	0	123	63
NoCalC	Eucalyptus globulus	EUGL	dbh	crown dia	meters	1/dbh	quad	0.69946	0.22521	-0.00051			1.11	22.25	0.11481	66	0.9	1.2	29.2	63
NoCalC	Eucalyptus globulus	EUGL	dbh	crown ht	meters	1/sqrt(dbh)	cub	0.38422	0.45643	-0.00337	1e-05		1.21	25.74	3.11888	66	0.708	2.5	37.3	62
NoCalC	Eucalyptus globulus	EUGL	cdia	dbh	meters	1	loglogw1	1.60965	2.69394	0.07296			2.79	140.01	0.27011	66	0.889	2.9	184	64
NoCalC	Eucalyptus globulus	EUGL	age	dbh	centimeters	1/sqrt(age)	quad	1.84032	2.33198	-0.00865			1.84	140.07	16.4723	67	0.967	2.9	184	64
NoCalC	Eucalyptus globulus	EUGL	dbh	leaf area	sq. meters	1/dbh	loglogw3	-0.2367	4.44786	0.00396			0.96	1278.78	0.06291	18	0.983	4.8	2314.1	16
NoCalC	Eucalyptus globulus	EUGL	dbh	tree ht	meters	1/sqrt(dbh)	cub	1.74868	0.74848	-0.00619	2e-05		3.11	34.98	5.79874	64	0.71	3.2	42.3	60
SWDsrt	Eucalyptus microtheca	EUMI2	dbh	age	years	1/dbh	quad	-2.15035	0.77762	-0.0041			0	45	0.98014	36	0.807	0	34	33
SWDsrt	Eucalyptus microtheca	EUMI2	dbh	crown dia	meters	1	loglogw1	-1.06339	2.57921	0.06742			0.68	16.61	0.25966	36	0.852	0.8	23.9	34
SWDsrt	Eucalyptus microtheca	EUMI2	dbh	crown ht	meters	1/dbh	cub	0.32823	0.48942	-0.00785	6e-05		1.53	20.74	0.15659	36	0.829	1.3	23.7	32
SWDsrt	Eucalyptus microtheca	EUMI2	cdia	dbh	meters	1/cdia^2	cub	1.10927	1.71838	0.46588	-0.02012		2.56	85.13	0.68488	36	0.933	2.5	86.9	32
SWDsrt	Eucalyptus microtheca	EUMI2	age	dbh	centimeters	1/age	lin	2.55896	1.83486				2.56	85.13	7.44081	36	0.893	2.5	86.9	34
SWDsrt	Eucalyptus microtheca	EUMI2	dbh	leaf area	sq. meters	1	loglogw1	-1.6015	5.525	0.33254			1.49	949.98	0.57666	36	0.843	2.3	1247.2	34
SWDsrt	Eucalyptus microtheca	EUMI2	dbh	tree ht	meters	1/dbh	cub	1.27242	0.57171	-0.00862	6e-05		2.68	23.39	0.13768	36	0.88	2.4	25.7	32
InlEmp	Eucalyptus sideroxylon	EUSI	dbh	age	years	1	loglogw1	-3.28691	4.95089	0.0332			0	80	0.0011	37	0.957	2	75	35
InlEmp	Eucalyptus sideroxylon	EUSI	dbh	crown dia	meters	1	expow1	1.66042	0.01674	0.06526			5.9	20.96	0.00426	37	0.67	4.5	24	35
InlEmp	Eucalyptus sideroxylon	EUSI	dbh	crown ht	meters	1	loglogw1	-0.42969	2.09572	0.08143			2.25	14.81	0.00663	37	0.614	3.5	20.5	35
InlEmp	Eucalyptus sideroxylon	EUSI	cdia	dbh	meters	1/sqrt(cdia)	quad	-19.8408	7.75123	-0.16216			4.85	65	45.5411	37	0.684	8.4	95	34
InlEmp	Eucalyptus sideroxylon	EUSI	age	dbh	centimeters	1/age^2	quad	4.85016	1.82135	-0.01093			4.85	80.62	0.04984	37	0.963	8.4	95	34
InlEmp	Eucalyptus sideroxylon	EUSI	dbh	leaf area	sq. meters	1	expow1	3.41319	0.04069	0.17979			40.46	882.87	0.03232	34	0.815	26.3	1292.3	32
InlEmp	Eucalyptus sideroxylon	EUSI	dbh	tree ht	meters	1	expow1	1.78929	0.01692	0.05577			6.68	24.07	0.00311	37	0.708	5.5	27.5	35
PacfNW	Fagus sylvatica	FASY	dbh	age	years	1/dbh	cub	1.00624	0.24853	0.0104	-0.0001		2	42	0.14285	38	0.982	1	38	34
PacfNW	Fagus sylvatica	FASY	dbh	crown dia	meters	1/sqrt(dbh)	cub	-0.02818	0.46803	-0.0055	3e-05		1.57	20.61	0.03187	38	0.98	0.2	21	34
PacfNW	Fagus sylvatica	FASY	dbh	crown ht	meters	1/dbh	cub	0.241	0.5817	-0.00797	5e-05		2.22	20.65	0.08994	38	0.957	0.5	20	34
PacfNW	Fagus sylvatica	FASY	cdia	dbh	meters	1/cdia^2	cub	0.8162	1.20719	0.26657	-0.00642		3.56	87.41	0.18994	38	0.981	1	88.3	34
PacfNW	Fagus sylvatica	FASY	age	dbh	centimeters	1/age	cub	-2.64454	3.28563	-0.09364	0.00158		3.56	87.41	1.11111	38	0.978	1	88.3	34
PacfNW	Fagus sylvatica	FASY	dbh	leaf area	sq. meters	1	loglogw1	-1.00002	5.53664	0.09336			4.39	1575.98	0.30556	34	0.97	2.6	1689.9	32
PacfNW	Fagus sylvatica	FASY	dbh	tree ht	meters	1/sqrt(dbh)	cub	0.25817	0.79152	-0.0123	7e-05		2.93	24.99	0.54725	38	0.962	0.5	24.5	34
Tropic	Ficus benjamina	FIBE	dbh	age	years	1/dbh	cub	1.69696	0.11736	0.02016	-0.0001		1	115	2.13427	59	0.935	0.1	105	55
Tropic	Ficus benjamina	FIBE	dbh	crown dia	meters	1/sqrt(dbh)	quad	-1.15447	0.39311	-0.00113			0.45	28.17	1.65019	59	0.868	1	36.5	56
Tropic	Ficus benjamina	FIBE	dbh	crown ht	meters	1/dbh	quad	0.20371	0.18713	-0.00053			0.97	14.29	0.12474	58	0.808	0.5	21	55
Tropic	Ficus benjamina	FIBE	cdia	dbh	meters	1/sqrt(cdia)	lin	6.78197	3.05766				4.13	108.41	55.4975	59	0.812	2.5	180.3	57
Tropic	Ficus benjamina	FIBE	age	dbh	centimeters	1/age	cub	2.24394	1.91147	-0.02323	0.00013		4.13	108.41	3.35285	59	0.933	2.5	180.3	55
Tropic	Ficus benjamina	FIBE	dbh	leaf area	sq. meters	1/dbh^2	cub	12.9945	-5.09099	0.34608	-0.00189		0.86	1114.22	10.8978	44	0.839	0.7	1402.4	40
Tropic	Ficus benjamina	FIBE	dbh	tree ht	meters	1/sqrt(dbh)	quad	0.49558	0.28606	-0.00089			1.66	21.06	1.1304	58	0.824	1.5	28	55
SoCalC	Ficus thonningii	FIMI	dbh	age	years	1	lin	-0.50677	0.69174				0	51	26.2467	31	0.82	0	55	29
SoCalC	Ficus thonningii	FIMI	dbh	crown dia	meters	1/dbh^2	lin	0.77625	0.16301				1.18	13.81	0.00072	31	0.966	1.2	13.5	29
SoCalC	Ficus thonningii	FIMI	dbh	crown ht	meters	1	lin	0.9057	0.07078				1.08	6.56	0.98155	31	0.557	0.8	7	29
SoCalC	Ficus thonningii	FIMI	cdia	dbh	meters	1/cdia	cub	-14.3494	15.6496	-1.57143	0.06766		2.5	79.95	4.75517	31	0.919	2.5	80	27
SoCalC	Ficus thonningii	FIMI	age	dbh	centimeters	1/age^2	cub	2.50388	3.61389	-0.12425	0.00163		2.5	79.95	0.042	33	0.979	2.5	80	29
SoCalC	Ficus thonningii	FIMI	dbh	leaf area	sq. meters	1	expow1	1.68974	0.05947	0.26925			7.19	719.63	0.51889	31	0.767	3.7	439.4	29
SoCalC	Ficus thonningii	FIMI	dbh	tree ht	meters	1/dbh^2	quad	0.94984	0.21877	-0.00104			1.49	11.8	0.0004	31	0.98	1.5	14.5	28
Tropic	Filicium decipiens	FIDE6	dbh	age	years	1	loglogw1	0.2299	2.53834	0.06045			1	58	0.24587	35	0.885	2	50	33
Tropic	Filicium decipiens	FIDE6	dbh	crown dia	meters	1/sqrt(dbh)	lin	1.01699	0.21036				1.35	13.85	0.46065	35	0.829	0.8	14.3	33
Tropic	Filicium decipiens	FIDE6	dbh	crown ht	meters	1/sqrt(dbh)	lin	0.88572	0.14217				1.11	9.56	0.3663	35	0.734	0	10.5	33
Tropic	Filicium decipiens	FIDE6	cdia	dbh	meters	1	lin	1.45015	3.85358				2.62	61.02	42.9757	35	0.795	2.5	57.7	33
Tropic	Filicium decipiens	FIDE6	age	dbh	centimeters	1/age	lin	0.5342	1.04288				1.58	61.02	1.74337	35	0.882	2.5	57.7	33
Tropic	Filicium decipiens	FIDE6	dbh	leaf area	sq. meters	1	loglogw1	-2.39695	5.63012	0.43673			0.22	356	0.66085	34	0.843	0.4	436.7	32
Tropic	Filicium decipiens	FIDE6	dbh	tree ht	meters	1/dbh	lin	2.35934	0.20484				2.68	14.86	0.11099	35	0.825	2.5	14	33
InterW	Fraxinus americana	FRAM	dbh	age	years	1	quad	-3.49631	1.18005	-0.01051			1	50	9.98713	28	0.836	3	34	25
InterW	Fraxinus americana	FRAM	dbh	crown dia	meters	1/dbh^2	lin	0.12373	0.28514				0.82	21.73	0.00201	28	0.942	1.8	19.1	26
InterW	Fraxinus americana	FRAM	dbh	crown ht	meters	1/dbh^2	lin	1.32139	0.19768				1.8	16.3	0.00281	28	0.847	2.5	15.5	26
InterW	Fraxinus americana	FRAM	cdia	dbh	meters	1/cdia^2	lin	0.60599	3.43547				2.44	75.76	0.31084	28	0.936	5.1	68.1	26
InterW	Fraxinus americana	FRAM	age	dbh	centimeters	1/age^2	lin	0.94594	1.49623				2.44	75.76	0.15789	28	0.87	5.1	68.1	26
InterW	Fraxinus americana	FRAM	dbh	leaf area	sq. meters	1/sqrt(dbh)	loglogw2	-8.41657	10.2181	0.10871			0.14	789.71	0.32971	27	0.903	0.2	786.5	25
InterW	Fraxinus americana	FRAM	dbh	tree ht	meters	1/dbh^2	lin	3.47196	0.19495				3.95	18.24	0.003	28	0.834	4.5	17	26
LoMidW	Fraxinus americana	FRAM	dbh	age	years	1/dbh^2	cub	5.50035	-0.64346	0.05181	-0.00036		3	90	0.07259	23	0.874	4	102	19
LoMidW	Fraxinus americana	FRAM	dbh	crown dia	meters	1	loglogw1	-0.59263	2.2256	0.04246			0.87	15.65	0.20607	55	0.875	1.6	21.1	53
LoMidW	Fraxinus americana	FRAM	dbh	crown ht	meters	1/dbh	quad	0.38279	0.42627	-0.00246			1.37	18.82	0.18694	55	0.843	1	25	52
LoMidW	Fraxinus americana	FRAM	cdia	dbh	meters	1/cdia^2	cub	4.82661	-0.6275	0.65065	-0.01879		2.34	86.36	1.79716	55	0.851	5.1	118.1	51
LoMidW	Fraxinus americana	FRAM	age	dbh	centimeters	1/age^2	quad	-3.53416	1.9916	-0.01103			2.34	86.36	0.06919	23	0.922	5.1	118.1	20
LoMidW	Fraxinus americana	FRAM	dbh	leaf area	sq. meters	1	loglogw1	-0.55046	4.84703	0.36009			2.81	991.19	0.60008	52	0.802	1.5	1795.2	50
LoMidW	Fraxinus americana	FRAM	dbh	tree ht	meters	1	loglogw1	0.15275	1.96967	0.04217			1.74	22.45	0.20534	55	0.847	3	29	53
MidWst	Fraxinus americana	FRAM	dbh	age	years	1	cub	-0.97466	0.72273	-0.01606	0.00026		1	24	0.57813	38	0.989	0	24	34
MidWst	Fraxinus americana	FRAM	dbh	crown dia	meters	1/dbh	cub	-0.37618	0.6022	-0.01746	0.00023		1.2	12.6	0.02282	38	0.965	1.4	13.5	34
MidWst	Fraxinus americana	FRAM	dbh	crown ht	meters	1	loglogw1	0.1123	1.72944	0.02332			1.9	11.53	0.15269	38	0.921	2	12.5	36
MidWst	Fraxinus americana	FRAM	cdia	dbh	meters	1/cdia^2	cub	5.47308	-2.47601	1.13514	-0.05546		3.74	45.6	0.15337	38	0.968	3.3	46.7	34
MidWst	Fraxinus americana	FRAM	age	dbh	centimeters	1	cub	2.83778	0.75231	0.15946	-0.00486		2.84	45.6	1.94961	38	0.991	3.3	46.7	34
MidWst	Fraxinus americana	FRAM	dbh	leaf area	sq. meters	1	loglogw1	-4.58675	7.64125	0.14424			0.42	343.72	0.37979	37	0.974	0.2	426.9	35
MidWst	Fraxinus americana	FRAM	dbh	tree ht	meters	1	loglogw1	0.65269	1.57152	0.01067			3.08	15.96	0.10332	38	0.955	3.5	17	36
NMtnPr	Fraxinus americana	FRAM	dbh	age	years	1/dbh^2	cub	-3.11077	1.2205	-0.01731	0.00015		1	64	0.01032	31	0.971	0	76	27
NMtnPr	Fraxinus americana	FRAM	dbh	crown dia	meters	1	loglogw1	-0.50892	2.27196	0.01345			1.19	17.46	0.11596	30	0.964	2.5	21.7	28
NMtnPr	Fraxinus americana	FRAM	dbh	crown ht	meters	1	loglogw1	-0.12157	2.00952	0.05384			1.67	17.59	0.05384	30	0.837	3	21	28
NMtnPr	Fraxinus americana	FRAM	cdia	dbh	meters	1/cdia^2	quad	2.38185	0.93088	0.19535			3.65	80.31	0.36583	30	0.944	2.9	89.2	27
NMtnPr	Fraxinus americana	FRAM	age	dbh	centimeters	1/age^2	cub	2.8422	0.77951	0.03184	-0.00039		2.84	80.31	0.03732	31	0.972	2.9	89.2	27
NMtnPr	Fraxinus americana	FRAM	dbh	leaf area	sq. meters	1	loglogw1	-1.71342	6.01046	0.27589			1.93	1595.47	0.52525	27	0.899	5	2045.8	25
NMtnPr	Fraxinus americana	FRAM	dbh	tree ht	meters	1	loglogw1	0.42963	1.73177	0.03643			2.63	20.12	0.19086	30	0.849	4.5	25	28
TpIntW	Fraxinus americana	FRAM	dbh	age	years	1/dbh	cub	6.97782	-0.19328	0.02275	-0.00012		4	98	0.6964	32	0.93	4	95	28
TpIntW	Fraxinus americana	FRAM	dbh	crown dia	meters	1/dbh	cub	-0.42167	0.52775	-0.00687	4e-05		0.67	24.02	0.05245	32	0.948	1.6	25.7	28
TpIntW	Fraxinus americana	FRAM	dbh	crown ht	meters	1/dbh	quad	1.49772	0.29894	-0.00113			2.13	20.42	0.05654	32	0.931	2.5	21.5	29
TpIntW	Fraxinus americana	FRAM	cdia	dbh	meters	1/cdia^2	quad	0.46773	2.11525	0.09822			2.12	105.58	0.54726	32	0.909	3.8	105.9	29
TpIntW	Fraxinus americana	FRAM	age	dbh	centimeters	1/age	cub	-8.43051	2.79568	-0.04049	0.00024		2.12	105.58	1.58617	32	0.908	3.8	105.9	28
TpIntW	Fraxinus americana	FRAM	dbh	leaf area	sq. meters	1	loglogw1	-1.59551	5.66887	0.28507			0.82	1495.54	0.53392	31	0.88	1.5	827.2	29
TpIntW	Fraxinus americana	FRAM	dbh	tree ht	meters	1/dbh	quad	3.377	0.29497	-0.00069			4	26.83	0.08517	32	0.918	4	28.5	29
InterW	Fraxinus angustifolia	FRAN2	dbh	age	years	1	loglogw1	-1.6051	3.80614	0.18296			1	67	0.42773	30	0.794	2	55	28
InterW	Fraxinus angustifolia	FRAN2	dbh	crown dia	meters	1/dbh	lin	0.79199	0.20969				1.58	11.57	0.02824	30	0.925	1.2	12.3	28
InterW	Fraxinus angustifolia	FRAN2	dbh	crown ht	meters	1/dbh	quad	0.36305	0.3137	-0.0028			1.51	9.08	0.0291	30	0.891	1.1	10.5	27
InterW	Fraxinus angustifolia	FRAN2	cdia	dbh	meters	1/cdia^2	cub	4.60275	-0.77387	1.03775	-0.05442		5.19	51.39	0.36071	30	0.929	5.1	64.5	26
InterW	Fraxinus angustifolia	FRAN2	age	dbh	centimeters	1/age	quad	3.77994	1.42036	-0.01059			3.78	51.39	2.64279	30	0.773	5.1	64.5	27
InterW	Fraxinus angustifolia	FRAN2	dbh	leaf area	sq. meters	1	loglogw1	-7.85173	9.7102	0.29966			0.29	354.1	0.54741	30	0.939	0.1	397.2	28
InterW	Fraxinus angustifolia	FRAN2	dbh	tree ht	meters	1	loglogw1	0.34217	1.51148	0.01088			2.78	11.29	0.10431	30	0.911	2.7	12.5	28
InlVal	Fraxinus angustifolia 'Raywood'	FRAN_R	dbh	age	years	1/dbh^2	lin	-1.47999	0.6059				0	40	0.02682	33	0.906	0	40	31
InlVal	Fraxinus angustifolia 'Raywood'	FRAN_R	dbh	crown dia	meters	1/sqrt(dbh)	loglogw2	-0.46082	2.09714	0.00387			1.02	11.68	0.06218	33	0.958	1	15.5	31
InlVal	Fraxinus angustifolia 'Raywood'	FRAN_R	dbh	crown ht	meters	1	loglogw1	-0.40477	2.08544	0.03835			1.11	12.11	0.19584	33	0.832	0.9	15.5	31
InlVal	Fraxinus angustifolia 'Raywood'	FRAN_R	cdia	dbh	meters	1/cdia^2	lin	-2.07474	4.398				1.02	11.68	0.90215	33	0.922	2.5	72	31
InlVal	Fraxinus angustifolia 'Raywood'	FRAN_R	age	dbh	centimeters	1/age^2	quad	2.51452	2.54844	-0.03194			2.51	53.34	0.21502	33	0.933	2.5	72	30
InlVal	Fraxinus angustifolia 'Raywood'	FRAN_R	dbh	leaf area	sq. meters	1/dbh^2	lin	-15.6707	7.08439				2.14	362.25	4.01682	33	0.898	2.2	520	31
InlVal	Fraxinus angustifolia 'Raywood'	FRAN_R	dbh	tree ht	meters	1/sqrt(dbh)	loglogw2	0.30682	1.72462	0.00325			2.02	14.99	0.05701	33	0.948	2	19	31
InlVal	Fraxinus excelsior 'Hessei'	FREX_H	dbh	age	years	1/dbh	lin	-0.78696	0.79416				0	60	1.08254	29	0.868	0	55	27
InlVal	Fraxinus excelsior 'Hessei'	FREX_H	dbh	crown dia	meters	1/dbh^2	quad	-0.07932	0.35604	-0.00245			0.99	12.83	0.00117	29	0.969	0.8	13	26
InlVal	Fraxinus excelsior 'Hessei'	FREX_H	dbh	crown ht	meters	1	quad	1.50152	0.28401	-0.00281			2.35	8.67	0.79632	29	0.821	0.8	10	26
InlVal	Fraxinus excelsior 'Hessei'	FREX_H	cdia	dbh	meters	1/cdia^2	cub	-1.0271	4.49547	-0.39473	0.03549		0.99	12.83	0.27266	29	0.959	2.5	66	25
InlVal	Fraxinus excelsior 'Hessei'	FREX_H	age	dbh	centimeters	1/sqrt(age)	lin	3.06926	1.12052				3.07	70.3	9.15551	29	0.902	2.5	66	27
InlVal	Fraxinus excelsior 'Hessei'	FREX_H	dbh	leaf area	sq. meters	1	loglogw1	-0.97023	4.66291	0.12365			2.25	351.5	0.35164	29	0.943	1.5	360	27
InlVal	Fraxinus excelsior 'Hessei'	FREX_H	dbh	tree ht	meters	1	cub	1.56888	0.53975	-0.01229	0.00011		3.11	16.43	0.48923	29	0.944	2	15.2	25
InlVal	Fraxinus holotricha	FRHO	dbh	age	years	1/dbh^2	cub	-3.02776	1.2452	-0.01964	0.00014		0	76	0.01091	31	0.957	0	60	27
InlVal	Fraxinus holotricha	FRHO	dbh	crown dia	meters	1/sqrt(dbh)	loglogw2	-0.75718	2.31301	0.00297			0.8	15.47	0.05453	31	0.976	0.8	16.5	29
InlVal	Fraxinus holotricha	FRHO	dbh	crown ht	meters	1/(dbh)^2	loglogw4	-0.75797	2.28159	2e-05			0.79	15.76	0.0045	31	0.991	0.8	21	29
InlVal	Fraxinus holotricha	FRHO	cdia	dbh	meters	1/(cdia)^2	loglogw4	2.04596	2.09605	0.00032			0.8	15.47	0.01791	31	0.995	2.5	102	29
InlVal	Fraxinus holotricha	FRHO	age	dbh	centimeters	1/age^2	quad	2.51709	2.29152	-0.01509			2.52	89.54	0.12192	31	0.962	2.5	102	28
InlVal	Fraxinus holotricha	FRHO	dbh	leaf area	sq. meters	1/sqrt(dbh)	loglogw2	-0.25744	4.41008	0.02085			2.16	651.97	0.1444	31	0.955	2.2	767.6	29
InlVal	Fraxinus holotricha	FRHO	dbh	tree ht	meters	1/(dbh)^2	loglogw4	0.30012	1.67602	1e-05			1.98	17.85	0.00384	31	0.988	2	25	29
PacfNW	Fraxinus latifolia	FRLA	dbh	age	years	1/dbh^2	quad	0.54234	0.5756	0.00247			2	85	0.02226	39	0.951	1	112	36
PacfNW	Fraxinus latifolia	FRLA	dbh	crown dia	meters	1/dbh^2	cub	0.18904	0.37563	-0.00399	2e-05		1.23	17.31	0	39	0.955	0.5	27.3	35
PacfNW	Fraxinus latifolia	FRLA	dbh	crown ht	meters	1/dbh^2	quad	0.53509	0.37254	-0.00163			1.59	21.16	0.00495	39	0.924	1	28	36
PacfNW	Fraxinus latifolia	FRLA	cdia	dbh	meters	1	loglogw1	1.76367	2.39953	0.06678			2.86	94.09	0.25841	39	0.955	1	141.2	37
PacfNW	Fraxinus latifolia	FRLA	age	dbh	centimeters	1/age	cub	-1.63283	2.29867	-0.02735	0.00016		2.86	94.09	1.19203	39	0.977	1	141.2	35
PacfNW	Fraxinus latifolia	FRLA	dbh	leaf area	sq. meters	1/sqrt(dbh)	loglogw2	-1.27832	5.54199	0.05757			1.54	1641.98	0.23994	34	0.986	0	2023.5	32
PacfNW	Fraxinus latifolia	FRLA	dbh	tree ht	meters	1/dbh	quad	1.40753	0.49125	-0.0026			2.79	24.58	0.20186	39	0.949	2	30	36
InterW	Fraxinus pennsylvanica	FRPE	dbh	age	years	1/dbh	cub	4.94208	-0.35291	0.05768	-0.00069		1	60	0.98388	31	0.902	3	58	27
InterW	Fraxinus pennsylvanica	FRPE	dbh	crown dia	meters	1/dbh^2	cub	-1.79996	0.65677	-0.014	0.00013		0.37	21.52	0.0019	31	0.946	1.3	20.2	27
InterW	Fraxinus pennsylvanica	FRPE	dbh	crown ht	meters	1/dbh	lin	2.37741	0.16325				2.78	13.91	0.08895	31	0.798	2	14	29
InterW	Fraxinus pennsylvanica	FRPE	cdia	dbh	meters	1	loglogw1	1.73505	2.10649	0.05769			3.57	70.61	0.24019	31	0.898	5.1	65.8	29
InterW	Fraxinus pennsylvanica	FRPE	age	dbh	centimeters	1/age^2	lin	2.43636	1.13626				2.44	70.61	0.10217	31	0.874	5.1	65.8	29
InterW	Fraxinus pennsylvanica	FRPE	dbh	leaf area	sq. meters	1/sqrt(dbh)	loglogw2	-7.41389	9.58687	0.0896			0.14	974.4	0.29933	30	0.936	0.2	1142.1	28
InterW	Fraxinus pennsylvanica	FRPE	dbh	tree ht	meters	1/dbh	lin	3.64876	0.19161				4.12	17.18	0.09239	31	0.84	4	17	29
LoMidW	Fraxinus pennsylvanica	FRPE	dbh	age	years	1/sqrt(dbh)	loglogw2	-0.63599	3.1476	0.01658			3	120	0.12878	29	0.938	4	88	27
LoMidW	Fraxinus pennsylvanica	FRPE	dbh	crown dia	meters	1/dbh	cub	-1.31091	0.54464	-0.00658	3e-05		0.55	19.22	0.07031	49	0.911	2.1	21.2	45
LoMidW	Fraxinus pennsylvanica	FRPE	dbh	crown ht	meters	1	loglogw1	-0.41849	2.13256	0.07955			0.81	18.44	0.28205	49	0.736	2.5	25	47
LoMidW	Fraxinus pennsylvanica	FRPE	cdia	dbh	meters	1	loglogw1	1.0079	3.10966	0.09092			3.56	104.79	0.30152	49	0.851	6.1	116.3	47
LoMidW	Fraxinus pennsylvanica	FRPE	age	dbh	centimeters	1/age	loglogw3	0.37847	2.72552	0.0012			1.89	112.57	0.03469	29	0.979	6.1	116.3	27
LoMidW	Fraxinus pennsylvanica	FRPE	dbh	leaf area	sq. meters	1	loglogw1	-1.6597	5.59277	0.35255			0.63	1366.8	0.59376	45	0.82	3.6	1262.3	43
LoMidW	Fraxinus pennsylvanica	FRPE	dbh	tree ht	meters	1/sqrt(dbh)	loglogw2	0.12517	1.8688	0.00978			1.27	21.8	0.09888	49	0.786	4.5	27.5	47
MidWst	Fraxinus pennsylvanica	FRPE	dbh	age	years	1/dbh^2	cub	0.64219	0.50049	-0.00115	2e-05		2	70	0.00156	46	0.989	3	60	42
MidWst	Fraxinus pennsylvanica	FRPE	dbh	crown dia	meters	1	loglogw1	-1.10801	2.59819	0.03031			0.43	18.25	0.17411	46	0.93	1.3	23.7	44
MidWst	Fraxinus pennsylvanica	FRPE	dbh	crown ht	meters	1/dbh	cub	-0.73231	0.67731	-0.01261	8e-05		0.57	23.67	0.11324	46	0.848	2	27	42
MidWst	Fraxinus pennsylvanica	FRPE	cdia	dbh	meters	1/cdia^2	cub	5.37282	-0.59669	0.69285	-0.02238		1.99	88	0.99473	46	0.912	5.8	107.2	42
MidWst	Fraxinus pennsylvanica	FRPE	age	dbh	centimeters	1/age	quad	-2.71787	2.37818	-0.01186			1.99	105.62	0.30639	42	0.993	5.8	107.2	39
MidWst	Fraxinus pennsylvanica	FRPE	dbh	leaf area	sq. meters	1	loglogw1	-5.96702	8.57193	0.31371			0.45	1854.81	0.5601	46	0.933	0.2	2213.4	44
MidWst	Fraxinus pennsylvanica	FRPE	dbh	tree ht	meters	1	loglogw1	0.38241	1.8267	0.02811			1.77	24.6	0.16767	46	0.875	4	35	44
NMtnPr	Fraxinus pennsylvanica	FRPE	dbh	age	years	1/dbh	cub	0.75084	0.26193	0.01658	-0.00011		0	97	1.08193	65	0.953	0	97	61
NMtnPr	Fraxinus pennsylvanica	FRPE	dbh	crown dia	meters	1	loglogw1	-0.57933	2.29794	0.01727			1.12	18.81	0.13141	64	0.929	2.7	22.6	62
NMtnPr	Fraxinus pennsylvanica	FRPE	dbh	crown ht	meters	1/dbh	quad	2.48182	0.32121	-0.00159			3.38	18.67	0.12444	64	0.849	4	27	61
NMtnPr	Fraxinus pennsylvanica	FRPE	cdia	dbh	meters	1	loglogw1	0.53726	3.5649	0.03954			2.83	99.01	0.19885	64	0.925	2.9	121.6	62
NMtnPr	Fraxinus pennsylvanica	FRPE	age	dbh	centimeters	1/age	quad	2.83395	1.44568	-0.00468			2.83	99.01	1.69983	65	0.972	2.9	121.6	62
NMtnPr	Fraxinus pennsylvanica	FRPE	dbh	leaf area	sq. meters	1/dbh^2	cub	-10.0478	3.33119	0.28544	-0.00168		1.65	1490.5	17.3598	56	0.87	9.7	2320.4	52
NMtnPr	Fraxinus pennsylvanica	FRPE	dbh	tree ht	meters	1/dbh	quad	2.75635	0.4068	-0.00206			3.89	22.87	0.14578	64	0.882	5	30	61
NoEast	Fraxinus pennsylvanica	FRPE	dbh	age	years	1/dbh^2	quad	0.15398	0.50207	0.01235			0	107	0.03573	41	0.934	2	85	38
NoEast	Fraxinus pennsylvanica	FRPE	dbh	crown dia	meters	1/dbh	cub	-0.55792	0.48266	-0.00527	2e-05		0.58	23.38	0.08497	44	0.923	0.7	24.7	40
NoEast	Fraxinus pennsylvanica	FRPE	dbh	crown ht	meters	1/dbh	quad	1.38179	0.24946	-0.00095			1.98	17.63	0.19123	44	0.775	0.8	26.5	41
NoEast	Fraxinus pennsylvanica	FRPE	cdia	dbh	meters	1/cdia^2	quad	2.09268	2.01095	0.13594			3.86	123.45	1.22058	52	0.896	2.7	122.7	49
NoEast	Fraxinus pennsylvanica	FRPE	age	dbh	centimeters	1/sqrt(age)	cub	2.41764	1.4626	-0.02052	0.00016		2.42	123.45	3.05806	41	0.947	2.7	122.7	37
NoEast	Fraxinus pennsylvanica	FRPE	dbh	leaf area	sq. meters	1/sqrt(dbh)	loglogw2	-1.51177	5.39015	0.06139			0.7	1234.45	0.24777	35	0.898	2.3	1217.3	33
NoEast	Fraxinus pennsylvanica	FRPE	dbh	tree ht	meters	1	loglogw1	-0.00104	2.0008	0.04176			1.56	23.48	0.20436	44	0.866	2.2	34	42
TpIntW	Fraxinus pennsylvanica	FRPE	dbh	age	years	1/dbh^2	cub	2.19713	0.45546	0.0158	-0.00011		2	115	0.03978	60	0.934	3	105	56
TpIntW	Fraxinus pennsylvanica	FRPE	dbh	crown dia	meters	1/sqrt(dbh)	loglogw2	-0.95682	2.57652	0.00393			0.6	18.91	0.06271	60	0.965	1.2	24.9	58
TpIntW	Fraxinus pennsylvanica	FRPE	dbh	crown ht	meters	1/dbh	quad	1.60012	0.27493	-0.00081			2.22	19.69	0.11384	60	0.897	2	30	57
TpIntW	Fraxinus pennsylvanica	FRPE	cdia	dbh	meters	1/cdia^2	cub	2.17165	1.10792	0.33067	-0.00863		2.28	89.44	0.69429	60	0.926	3.6	116.8	56
TpIntW	Fraxinus pennsylvanica	FRPE	age	dbh	centimeters	1/age	quad	-0.36183	1.32795	-0.00476			2.28	89.44	1.22443	60	0.948	3.6	116.8	57
TpIntW	Fraxinus pennsylvanica	FRPE	dbh	leaf area	sq. meters	1	loglogw1	-1.93054	5.86857	0.21107			0.65	1139.35	0.45942	56	0.913	0.8	2191.7	54
TpIntW	Fraxinus pennsylvanica	FRPE	dbh	tree ht	meters	1/dbh	quad	3.1217	0.31412	-0.00092			3.83	23.83	0.10703	60	0.924	4	33	57
InlVal	Fraxinus pennsylvanica 'Marshall'	FRPE_M	dbh	age	years	1/dbh^2	lin	-1.7674	0.79278				1	48	0.05218	30	0.879	0	43	28
InlVal	Fraxinus pennsylvanica 'Marshall'	FRPE_M	dbh	crown dia	meters	1/dbh	loglogw3	-0.81764	2.56316	0.00125			0.8	13.85	0.03532	30	0.978	0.8	16.5	28
InlVal	Fraxinus pennsylvanica 'Marshall'	FRPE_M	dbh	crown ht	meters	1/(dbh)^2	loglogw4	-0.73869	2.19769	7e-05			0.79	9.54	0.00819	30	0.986	0.8	13.5	28
InlVal	Fraxinus pennsylvanica 'Marshall'	FRPE_M	cdia	dbh	meters	1	loglogw1	1.76895	1.81547	0.04999			0.8	13.85	0.22359	30	0.827	2.5	50	28
InlVal	Fraxinus pennsylvanica 'Marshall'	FRPE_M	age	dbh	centimeters	1/age^2	quad	2.52274	1.72537	-0.01816			2.52	43.49	0.12676	30	0.929	2.5	50	27
InlVal	Fraxinus pennsylvanica 'Marshall'	FRPE_M	dbh	leaf area	sq. meters	1/sqrt(dbh)	loglogw2	-0.32643	4.57047	0.02998			2.12	353.67	0.17315	30	0.928	2.2	511.3	28
InlVal	Fraxinus pennsylvanica 'Marshall'	FRPE_M	dbh	tree ht	meters	1/(dbh)^2	loglogw4	0.32164	1.58718	3e-05			1.99	11.77	0.0053	30	0.989	2	16.5	28
InlEmp	Fraxinus uhdei	FRUH	dbh	age	years	1	quad	-12.6224	1.18756	-0.00682			1	90	19.3436	37	0.851	5	40	34
InlEmp	Fraxinus uhdei	FRUH	dbh	crown dia	meters	1	loglogw1	-0.7885	2.50884	0.02599			0.29	23.31	0.00068	37	0.826	4	25	35
InlEmp	Fraxinus uhdei	FRUH	dbh	crown ht	meters	1/dbh	lin	3.72398	0.1558				3.93	22.11	0.1002	37	0.778	3.5	21.5	35
InlEmp	Fraxinus uhdei	FRUH	cdia	dbh	meters	1	loglogw1	0.54286	3.43609	0.05432			1.29	117.96	0.00295	37	0.811	14.1	120.5	35
InlEmp	Fraxinus uhdei	FRUH	age	dbh	centimeters	1/sqrt(age)	loglogw2	1.13547	2.4092	0.01081			1.29	118.04	0.00012	37	0.859	14.1	120.5	35
InlEmp	Fraxinus uhdei	FRUH	dbh	leaf area	sq. meters	1/dbh	loglogw3	-1.72679	5.6651	0.00208			0.06	1255.73	0	37	0.902	52.2	1948.2	35
InlEmp	Fraxinus uhdei	FRUH	dbh	tree ht	meters	1	loglogw1	-0.72201	2.56053	0.02087			0.31	26.82	0.00044	37	0.861	4.5	28.5	35
SWDsrt	Fraxinus uhdei	FRUH	dbh	age	years	1/dbh	cub	-2.20498	1.34387	-0.0209	0.00016		0	45	0.39499	32	0.936	0	44	28
SWDsrt	Fraxinus uhdei	FRUH	dbh	crown dia	meters	1/dbh	lin	0.8377	0.24411				1.46	18.45	0.03854	32	0.947	0.9	16.4	30
SWDsrt	Fraxinus uhdei	FRUH	dbh	crown ht	meters	1/sqrt(dbh)	lin	1.08446	0.19785				1.59	15.36	0.14766	32	0.937	0.9	13.8	30
SWDsrt	Fraxinus uhdei	FRUH	cdia	dbh	meters	1/cdia	lin	-2.29924	3.92549				2.53	72.15	2.02801	32	0.948	2.5	69.1	30
SWDsrt	Fraxinus uhdei	FRUH	age	dbh	centimeters	1/age^2	quad	2.53294	0.70649	0.01868			2.53	72.15	0.07975	32	0.929	2.5	69.1	29
SWDsrt	Fraxinus uhdei	FRUH	dbh	leaf area	sq. meters	1/dbh^2	quad	2.66372	-0.02046	0.222			4.04	1156.76	6.04595	30	0.859	2.1	1143.5	27
SWDsrt	Fraxinus uhdei	FRUH	dbh	tree ht	meters	1	cub	2.10487	0.40334	-0.00703	7e-05		3.08	20.28	0.84775	32	0.931	2.2	18.9	28
InterW	Fraxinus velutina	FRVE	dbh	age	years	1/sqrt(dbh)	quad	-4.26425	1.29921	-0.00945			0	52	4.08263	65	0.91	2	46	62
InterW	Fraxinus velutina	FRVE	dbh	crown dia	meters	1/dbh	quad	0.25201	0.34447	-0.0015			1.81	16.42	0.05398	65	0.954	1.8	22.1	62
InterW	Fraxinus velutina	FRVE	dbh	crown ht	meters	1/dbh^2	cub	2.82011	0.01849	0.00599	-6e-05		3.03	13.38	0.00183	65	0.886	2.6	18	61
InterW	Fraxinus velutina	FRVE	cdia	dbh	meters	1/cdia^2	cub	2.4018	1.13515	0.3295	-0.01045		4.61	65.67	0.38022	65	0.943	4.3	78.7	61
InterW	Fraxinus velutina	FRVE	age	dbh	centimeters	1/age^2	cub	4.61345	0.39975	0.05339	-0.00074		4.61	65.67	0.12717	65	0.898	4.3	78.7	61
InterW	Fraxinus velutina	FRVE	dbh	leaf area	sq. meters	1	loglogw1	-6.93084	9.36004	0.32139			0.37	946.12	0.56691	65	0.949	0.3	1601.4	63
InterW	Fraxinus velutina	FRVE	dbh	tree ht	meters	1/dbh^2	lin	3.37494	0.19932				4.29	16.46	0.00177	65	0.919	4	22	63
NoCalC	Fraxinus velutina	FRVE	dbh	age	years	1	quad	2.07232	1.19789	-0.00721			0	64	59.8867	33	0.772	0	63	30
NoCalC	Fraxinus velutina	FRVE	dbh	crown dia	meters	1	loglogw1	-0.79158	2.39893	0.02292			0.94	16.36	0.15139	32	0.939	1.1	17.9	30
NoCalC	Fraxinus velutina	FRVE	dbh	crown ht	meters	1	loglogw1	-0.03158	1.64567	0.04846			1.63	11.4	0.22013	32	0.773	1.4	13.7	30
NoCalC	Fraxinus velutina	FRVE	cdia	dbh	meters	1/cdia^2	cub	2.67625	0.28988	0.52924	-0.01795		3.51	78	0.48987	32	0.943	2.9	78.9	28
NoCalC	Fraxinus velutina	FRVE	age	dbh	centimeters	1/age^2	quad	2.84341	0.65806	0.00963			2.84	84.4	0.12178	33	0.882	2.9	78.9	30
NoCalC	Fraxinus velutina	FRVE	dbh	leaf area	sq. meters	1	loglogw1	-0.80328	4.81997	0.32229			3.24	707.1	0.56771	29	0.821	1.6	694.8	27
NoCalC	Fraxinus velutina	FRVE	dbh	tree ht	meters	1	loglogw1	0.76815	1.38864	0.0221			3.3	17.18	0.14868	32	0.842	4	21.3	30
SWDsrt	Fraxinus velutina	FRVE	dbh	age	years	1/sqrt(dbh)	quad	0.61249	1.17848	-0.00895			0	45	5.55435	59	0.842	0	42	56
SWDsrt	Fraxinus velutina	FRVE	dbh	crown dia	meters	1/dbh	quad	0.64395	0.31029	-0.00173			2.45	14.52	0.05602	59	0.928	1	17.8	56
SWDsrt	Fraxinus velutina	FRVE	dbh	crown ht	meters	1	loglogw1	-0.51298	1.95658	0.05127			2.26	11.25	0.22643	59	0.843	1.1	16.4	57
SWDsrt	Fraxinus velutina	FRVE	cdia	dbh	meters	1	loglogw1	1.27969	2.76902	0.06197			6.01	60	0.24894	59	0.906	2.5	80.4	57
SWDsrt	Fraxinus velutina	FRVE	age	dbh	centimeters	1	expow1	1.71976	0.05882	0.1485			6.01	84.87	0.1485	59	0.775	2.5	80.4	57
SWDsrt	Fraxinus velutina	FRVE	dbh	leaf area	sq. meters	1	loglogw1	-0.79661	4.65791	0.48159			17.32	605.13	0.69397	55	0.746	2.4	732.1	53
SWDsrt	Fraxinus velutina	FRVE	dbh	tree ht	meters	1	loglogw1	0.35063	1.54407	0.02679			4.02	14.32	0.16369	59	0.866	2.2	18.6	57
InlEmp	Fraxinus velutina 'Modesto'	FRVE_G	dbh	age	years	1/dbh	cub	2.25199	-0.65051	0.07444	-0.00087		0	59	1.00211	36	0.938	0	50	32
InlEmp	Fraxinus velutina 'Modesto'	FRVE_G	dbh	crown dia	meters	1/dbh	quad	1.53842	0.24366	-0.00141			2.26	10.23	0.07356	36	0.877	2	15	33
InlEmp	Fraxinus velutina 'Modesto'	FRVE_G	dbh	crown ht	meters	1	loglogw1	-0.35977	1.75665	0.07464			1.31	7.88	0.00557	36	0.794	1	13	34
InlEmp	Fraxinus velutina 'Modesto'	FRVE_G	cdia	dbh	meters	1/cdia^2	quad	-13.389	8.10614	-0.22181			3.02	50.32	1.11783	36	0.887	2.9	59.9	33
InlEmp	Fraxinus velutina 'Modesto'	FRVE_G	age	dbh	centimeters	1/age	quad	3.02365	1.59851	-0.01351			3.02	50.32	1.66632	36	0.95	2.9	59.9	33
InlEmp	Fraxinus velutina 'Modesto'	FRVE_G	dbh	leaf area	sq. meters	1	loglogw1	0.16249	3.98037	0.2948			11.92	319.17	0.08691	36	0.834	3.2	479.2	34
InlEmp	Fraxinus velutina 'Modesto'	FRVE_G	dbh	tree ht	meters	1/dbh	quad	2.2959	0.26454	-0.00136			3.08	12.15	0.07705	36	0.897	3	17	33
InlVal	Fraxinus velutina 'Modesto'	FRVE_G	dbh	age	years	1/dbh^2	lin	-1.82361	0.73114				1	75	0.0203	30	0.955	0	80	28
InlVal	Fraxinus velutina 'Modesto'	FRVE_G	dbh	crown dia	meters	1/(dbh)^2	loglogw4	-0.51257	2.18667	1e-05			0.99	15.17	0.00305	30	0.995	1	19.4	28
InlVal	Fraxinus velutina 'Modesto'	FRVE_G	dbh	crown ht	meters	1/(dbh)^2	loglogw4	-0.76842	2.32508	2e-05			0.79	14.74	0.00421	30	0.992	0.8	20.5	28
InlVal	Fraxinus velutina 'Modesto'	FRVE_G	cdia	dbh	meters	1/(cdia)^2	loglogw4	1.78995	2.33977	0.00022			0.99	15.17	0.01476	30	0.996	2.5	90	28
InlVal	Fraxinus velutina 'Modesto'	FRVE_G	age	dbh	centimeters	1/age^2	quad	2.52059	1.94085	-0.01297			2.52	75.13	0.05391	30	0.971	2.5	90	27
InlVal	Fraxinus velutina 'Modesto'	FRVE_G	dbh	leaf area	sq. meters	1/dbh^2	loglogw4	-0.30095	4.44859	3e-05			2.06	550.56	0.00564	30	0.996	2.1	905.9	28
InlVal	Fraxinus velutina 'Modesto'	FRVE_G	dbh	tree ht	meters	1/dbh^2	lin	1.33557	0.26367				2	21.14	0.00233	30	0.96	2	24	28
SacVal	Fraxinus velutina 'Modesto'	FRVE_G	dbh	age	years	1	loglogw1	-2.61466	4.43216	0.3084	0.09511		0	77	0.55534	39	0.891	1	72	37
SacVal	Fraxinus velutina 'Modesto'	FRVE_G	dbh	crown dia	meters	1/dbh	lin	2.70647	0.15246				2.89	20.4	0.11928	40	0.816	2.7	25	38
SacVal	Fraxinus velutina 'Modesto'	FRVE_G	dbh	crown ht	meters	1/dbh	lin	2.88187	0.11198				3.02	15.88	0.08311	40	0.775	3	18.5	38
SacVal	Fraxinus velutina 'Modesto'	FRVE_G	cdia	dbh	meters	1	lin	1.09207	4.93654				1.22	116.04	237.191	40	0.729	4.4	145.5	38
SacVal	Fraxinus velutina 'Modesto'	FRVE_G	age	dbh	centimeters	1/age^2	cub	1.22216	3.08089	-0.06277	0.00055		1.22	116.04	0.10097	39	0.953	4.4	145.5	35
SacVal	Fraxinus velutina 'Modesto'	FRVE_G	dbh	leaf area	sq. meters	1/dbh^2	quad	-0.74319	2.93741	0.04194			2.91	904.97	5.11589	37	0.796	10	1007	34
SacVal	Fraxinus velutina 'Modesto'	FRVE_G	dbh	tree ht	meters	1/dbh^2	quad	2.97386	0.2269	-0.00087			3.25	17.62	0.002	40	0.892	4	23	37
InlEmp	Ginkgo biloba	GIBI	dbh	age	years	1/dbh	cub	3.90604	-0.32381	0.05349	-0.00056		1	50	1.11829	37	0.911	2	55	33
InlEmp	Ginkgo biloba	GIBI	dbh	crown dia	meters	1	loglogw1	0.04666	1.92419	0.0543			0.81	15.12	0.00295	37	0.791	1.5	21.5	35
InlEmp	Ginkgo biloba	GIBI	dbh	crown ht	meters	1	loglogw1	-0.22099	2.05741	0.06862			0.64	13.76	0.00471	37	0.774	1	19.5	35
InlEmp	Ginkgo biloba	GIBI	cdia	dbh	meters	1	loglogw1	0.84634	2.82324	0.10942			1.37	50.82	0.01197	37	0.775	2.4	74.7	35
InlEmp	Ginkgo biloba	GIBI	age	dbh	centimeters	1/age	cub	-0.86799	2.29723	-0.05924	0.00068		1.37	50.82	1.84087	37	0.87	2.4	74.7	33
InlEmp	Ginkgo biloba	GIBI	dbh	leaf area	sq. meters	1	loglogw1	-1.81743	5.51228	0.20833			0.08	349.29	0.0434	35	0.889	0.8	689.6	33
InlEmp	Ginkgo biloba	GIBI	dbh	tree ht	meters	1	loglogw1	0.24141	1.8408	0.04822			1.02	16.12	0.00233	37	0.796	2	23.5	35
InlVal	Ginkgo biloba	GIBI	dbh	age	years	1	cub	1.12019	1.82781	-0.03961	0.00034		0	67	16.4194	34	0.896	0	64	30
InlVal	Ginkgo biloba	GIBI	dbh	crown dia	meters	1	loglogw1	-0.6057	2.10485	0.03312			0.9	12.14	0.18199	34	0.93	0.7	14	32
InlVal	Ginkgo biloba	GIBI	dbh	crown ht	meters	1/dbh	lin	1.45556	0.21001				1.98	17.51	0.13027	34	0.852	0.8	19	32
InlVal	Ginkgo biloba	GIBI	cdia	dbh	meters	1/cdia^2	quad	-0.01563	2.9815	0.17405			0.9	12.14	0.78584	34	0.937	2.5	78	31
InlVal	Ginkgo biloba	GIBI	age	dbh	centimeters	1/age^2	cub	2.54104	-0.10418	0.0531	-0.00052		2.49	76.46	0.07015	34	0.921	2.5	78	30
InlVal	Ginkgo biloba	GIBI	dbh	leaf area	sq. meters	1	loglogw1	-0.89371	4.79939	0.2071			1.75	531.06	0.45508	34	0.917	0.9	682	32
InlVal	Ginkgo biloba	GIBI	dbh	tree ht	meters	1/dbh	cub	1.11408	0.53441	-0.00981	8e-05		2.38	21.29	0.10588	34	0.909	1.6	23	30
MidWst	Ginkgo biloba	GIBI	dbh	age	years	1/dbh^2	quad	-3.88622	1.16852	-0.01003			0	40	0.01897	48	0.944	0	27	45
MidWst	Ginkgo biloba	GIBI	dbh	crown dia	meters	1/dbh	lin	0.22006	0.22938				1.04	11.51	0.04913	48	0.891	0.8	9.2	46
MidWst	Ginkgo biloba	GIBI	dbh	crown ht	meters	1/dbh	quad	-0.00138	0.33859	-0.00299			1.17	9.42	0.04858	48	0.898	0.5	10.5	45
MidWst	Ginkgo biloba	GIBI	cdia	dbh	meters	1/cdia	cub	3.70689	-0.19414	1.29742	-0.10433		3.59	30	3.14824	48	0.898	3	38.6	44
MidWst	Ginkgo biloba	GIBI	age	dbh	centimeters	1/sqrt(age)	lin	3.58555	1.14093				3.59	49.22	3.00452	48	0.953	3	38.6	46
MidWst	Ginkgo biloba	GIBI	dbh	leaf area	sq. meters	1	loglogw1	-7.68043	9.20939	0.3855			0.2	167.09	0.62089	48	0.948	0	111.1	46
MidWst	Ginkgo biloba	GIBI	dbh	tree ht	meters	1/dbh^2	quad	1.07265	0.49602	-0.00525			2.78	12.78	0.00387	48	0.927	2.5	14	45
NoCalC	Ginkgo biloba	GIBI	dbh	age	years	1/dbh	quad	0.04947	1.93819	-0.01907			0	58	2.3726	34	0.91	0	58	31
NoCalC	Ginkgo biloba	GIBI	dbh	crown dia	meters	1/dbh^2	quad	0.34638	0.37483	-0.0035			1.11	9.66	0.00298	33	0.958	0.6	11.5	30
NoCalC	Ginkgo biloba	GIBI	dbh	crown ht	meters	1/sqrt(dbh)	quad	0.70307	0.37326	-0.00412			1.46	9	0.37977	33	0.863	0.6	11.6	30
NoCalC	Ginkgo biloba	GIBI	cdia	dbh	meters	1	loglogw1	1.40479	2.39723	0.04898			2.07	39.15	0.22133	33	0.954	0.5	38.7	31
NoCalC	Ginkgo biloba	GIBI	age	dbh	centimeters	1/sqrt(age)	lin	2.07017	0.63933				2.07	39.15	5.21385	34	0.9	0.5	38.7	32
NoCalC	Ginkgo biloba	GIBI	dbh	leaf area	sq. meters	1	loglogw1	0.56279	3.65277	0.42631			5.04	254.57	0.65293	32	0.878	0.2	370.1	30
NoCalC	Ginkgo biloba	GIBI	dbh	tree ht	meters	1/sqrt(dbh)	quad	1.0447	0.56054	-0.00713			2.17	12.06	0.44889	33	0.91	1	15	30
NoEast	Ginkgo biloba	GIBI	dbh	age	years	1/dbh^2	quad	2.00627	0.94391	8e-05			0	104	0.53569	82	0.844	2	85	79
NoEast	Ginkgo biloba	GIBI	dbh	crown dia	meters	1/dbh	quad	0.56506	0.23562	-0.00074			1.01	15	0.07995	32	0.906	1.2	17.8	29
NoEast	Ginkgo biloba	GIBI	dbh	crown ht	meters	1/dbh	quad	0.04776	0.3524	-0.00197			0.72	15.72	0.05556	33	0.95	1	19	30
NoEast	Ginkgo biloba	GIBI	cdia	dbh	meters	1	loglogw1	1.79975	2.39243	0.10243			3.01	82.59	0.32004	32	0.871	1.1	106.2	30
NoEast	Ginkgo biloba	GIBI	age	dbh	centimeters	1/age	quad	1.91918	1.0947	-0.00307			1.92	82.59	3.16976	82	0.85	1.1	106.2	79
NoEast	Ginkgo biloba	GIBI	dbh	leaf area	sq. meters	1	loglogw1	-2.26741	5.50962	0.50117			0.48	508.49	0.70794	22	0.837	1.6	787.8	20
NoEast	Ginkgo biloba	GIBI	dbh	tree ht	meters	1/dbh^2	quad	1.50395	0.44055	-0.00251			2.34	20.74	0.0023	33	0.96	3	23	30
SacVal	Ginkgo biloba	GIBI	dbh	age	years	1/dbh^2	cub	-0.30338	0.63908	0.01137	-8e-05		1	117	0.05547	60	0.936	0.1	112	56
SacVal	Ginkgo biloba	GIBI	dbh	crown dia	meters	1/sqrt(dbh)	cub	0.74902	0.3336	-0.00273	1e-05		1.46	23.61	0.45037	57	0.914	1.3	24.2	53
SacVal	Ginkgo biloba	GIBI	dbh	crown ht	meters	1/dbh	quad	1.93745	0.26338	-0.00063			2.51	23.92	0.14977	56	0.904	2.2	26.4	53
SacVal	Ginkgo biloba	GIBI	cdia	dbh	meters	1/cdia	quad	-1.39794	3.51608	0.05285			2.17	120.81	6.97642	57	0.908	0.6	117.1	54
SacVal	Ginkgo biloba	GIBI	age	dbh	centimeters	1/age	cub	0.45133	1.73857	-0.02112	0.00013		2.17	120.81	2.07298	60	0.95	0.6	117.1	56
SacVal	Ginkgo biloba	GIBI	dbh	leaf area	sq. meters	1/dbh^2	cub	0.5349	0.45713	0.16613	-0.00092		2.3	852.53	3.83356	57	0.894	0.9	983.6	53
SacVal	Ginkgo biloba	GIBI	dbh	tree ht	meters	1/dbh^2	quad	1.96732	0.37958	-0.00158			2.78	24.77	0.00461	56	0.947	2.2	30.2	53
GulfCo	Gleditsia triacanthos	GLTR	dbh	age	years	1/sqrt(dbh)	cub	-8.04986	3.20237	-0.15081	0.00259		1	47	6.14296	37	0.716	0	40	33
GulfCo	Gleditsia triacanthos	GLTR	dbh	crown dia	meters	1	loglogw1	-0.53985	2.30832	0.03039			1.02	11.11	0.17432	37	0.89	0.9	13.2	35
GulfCo	Gleditsia triacanthos	GLTR	dbh	crown ht	meters	1	loglogw1	-0.82873	2.24561	0.06936			0.78	7.78	0.26337	36	0.774	0.7	9.5	34
GulfCo	Gleditsia triacanthos	GLTR	cdia	dbh	meters	1/cdia^2	lin	0.01705	2.73407				3.88	34.54	0.38533	37	0.909	2.5	39.4	35
GulfCo	Gleditsia triacanthos	GLTR	age	dbh	centimeters	1/age^2	quad	2.52626	1.37056	-0.01467			2.53	34.54	0.12403	37	0.9	2.5	39.4	34
GulfCo	Gleditsia triacanthos	GLTR	dbh	leaf area	sq. meters	1	expow1	0.74144	0.10207	0.83082			4.12	108.03	0.91149	33	0.44	2.6	154.9	31
GulfCo	Gleditsia triacanthos	GLTR	dbh	tree ht	meters	1	loglogw1	0.05139	1.78587	0.04928			1.65	10.35	0.22198	36	0.753	1.5	11.5	34
InlVal	Gleditsia triacanthos	GLTR	dbh	age	years	1/dbh^2	cub	-5.62522	2.34838	-0.05103	0.00038		1	65	0.00918	29	0.979	0	50	25
InlVal	Gleditsia triacanthos	GLTR	dbh	crown dia	meters	1/dbh^2	loglogw4	-0.42231	2.20775	1e-05			1.09	16.55	0.0031	29	0.997	1.1	19	27
InlVal	Gleditsia triacanthos	GLTR	dbh	crown ht	meters	1/dbh^2	loglogw4	-0.90117	2.32262	5e-05			0.7	13.47	0.00723	29	0.983	0.7	17	27
InlVal	Gleditsia triacanthos	GLTR	cdia	dbh	meters	1	loglogw1	1.56066	2.33518	0.02921			1.09	16.55	0.1709	29	0.914	2.5	80	27
InlVal	Gleditsia triacanthos	GLTR	age	dbh	centimeters	1/age^2	lin	2.5264	1.36037				2.53	70.55	0.10317	29	0.943	2.5	80	27
InlVal	Gleditsia triacanthos	GLTR	dbh	leaf area	sq. meters	1/dbh^2	loglogw4	-0.95928	4.86431	9e-05			1.18	563.77	0.00967	29	0.993	1.2	705	27
InlVal	Gleditsia triacanthos	GLTR	dbh	tree ht	meters	1/dbh^2	loglogw4	0.30463	1.6554	3e-05			1.99	16.17	0.00551	29	0.981	2	21	27
InterW	Gleditsia triacanthos	GLTR	dbh	age	years	1/sqrt(dbh)	quad	-0.83991	1.00937	-0.0037			0	57	5.22749	68	0.881	2	49	65
InterW	Gleditsia triacanthos	GLTR	dbh	crown dia	meters	1/dbh	cub	-0.72835	0.58463	-0.01157	0.0001		0.78	16.19	0.05651	68	0.92	1.2	17.1	64
InterW	Gleditsia triacanthos	GLTR	dbh	crown ht	meters	1/dbh^2	lin	1.33382	0.17278				1.8	12.75	0.00268	68	0.832	1.9	18	66
InterW	Gleditsia triacanthos	GLTR	cdia	dbh	meters	1/cdia^2	cub	9.08715	-3.42635	1.03402	-0.03964		2.72	66.08	0.46358	68	0.924	4.8	66.8	64
InterW	Gleditsia triacanthos	GLTR	age	dbh	centimeters	1/sqrt(age)	lin	2.71672	1.11169				2.72	66.08	8.56222	68	0.886	4.8	66.8	66
InterW	Gleditsia triacanthos	GLTR	dbh	leaf area	sq. meters	1	loglogw1	-6.57356	8.70487	0.45562			0.24	595.92	0.675	67	0.894	0.2	1093.6	65
InterW	Gleditsia triacanthos	GLTR	dbh	tree ht	meters	1/dbh^2	lin	2.51844	0.21563				3.1	16.77	0.00278	68	0.882	3	20	66
LoMidW	Gleditsia triacanthos	GLTR	dbh	age	years	1/dbh^2	quad	3.10377	0.27378	0.00942			2	100	0.02816	19	0.852	5	56	16
LoMidW	Gleditsia triacanthos	GLTR	dbh	crown dia	meters	1/dbh^2	quad	0.70515	0.41163	-0.00239			1.46	18.45	0.00083	35	0.981	2.3	19.3	32
LoMidW	Gleditsia triacanthos	GLTR	dbh	crown ht	meters	1	loglogw1	-0.68869	2.36889	0.05236			0.6	20.46	0.22881	35	0.855	2	20.5	33
LoMidW	Gleditsia triacanthos	GLTR	cdia	dbh	meters	1/sqrt(cdia)	loglogw2	0.64501	3.19319	0.01171			1.6	115.3	0.10821	35	0.95	4.1	113	33
LoMidW	Gleditsia triacanthos	GLTR	age	dbh	centimeters	1/age	lin	1.85536	1.13446				1.86	115.3	0.87827	19	0.927	4.1	113	17
LoMidW	Gleditsia triacanthos	GLTR	dbh	leaf area	sq. meters	1	loglogw1	-1.62517	5.75729	0.19643			0.43	1755.8	0.44321	31	0.906	2.7	1364.7	29
LoMidW	Gleditsia triacanthos	GLTR	dbh	tree ht	meters	1	loglogw1	0.09613	1.95276	0.02334			1.24	23.25	0.15279	35	0.9	3	22.5	33
MidWst	Gleditsia triacanthos	GLTR	dbh	age	years	1	cub	0.06413	0.63494	-0.01184	0.00013		1	21	1.63838	48	0.958	0	23	44
MidWst	Gleditsia triacanthos	GLTR	dbh	crown dia	meters	1	loglogw1	-0.47127	2.22176	0.02171			1.71	13.69	0.14734	48	0.95	1.6	17.4	46
MidWst	Gleditsia triacanthos	GLTR	dbh	crown ht	meters	1/dbh	lin	0.58489	0.24569				1.51	13.8	0.09563	48	0.895	0.8	19.7	46
MidWst	Gleditsia triacanthos	GLTR	cdia	dbh	meters	1/cdia^2	cub	4.75793	-1.29771	0.68056	-0.02543		3.77	53.79	0.26751	48	0.947	4.1	61.5	44
MidWst	Gleditsia triacanthos	GLTR	age	dbh	centimeters	1/sqrt(age)	cub	4.22795	-0.82484	0.37243	-0.01051		3.77	53.79	2.5996	48	0.984	4.1	61.5	44
MidWst	Gleditsia triacanthos	GLTR	dbh	leaf area	sq. meters	1	loglogw1	-5.74116	8.48657	0.20082			0.24	513.57	0.44813	48	0.968	0.2	797.6	46
MidWst	Gleditsia triacanthos	GLTR	dbh	tree ht	meters	1/dbh	cub	0.64936	0.69261	-0.0149	0.00015		3.05	18.36	0.07495	48	0.943	2.6	22	44
NMtnPr	Gleditsia triacanthos	GLTR	dbh	age	years	1/dbh^2	lin	-2.13193	0.83672				0	120	0.03007	64	0.939	0	86	62
NMtnPr	Gleditsia triacanthos	GLTR	dbh	crown dia	meters	1	loglogw1	-0.24887	2.08432	0.01423			1.45	19.1	0.11929	63	0.944	2.2	22.4	61
NMtnPr	Gleditsia triacanthos	GLTR	dbh	crown ht	meters	1/dbh	quad	1.24599	0.35965	-0.0017			2.25	20.2	0.12747	63	0.898	3	25.5	60
NMtnPr	Gleditsia triacanthos	GLTR	cdia	dbh	meters	1/cdia^2	cub	11.1425	-4.40068	0.88116	-0.02288		2.82	101.75	0.632	63	0.931	2.9	111.3	59
NMtnPr	Gleditsia triacanthos	GLTR	age	dbh	centimeters	1/age	quad	2.82434	1.53556	-0.00593			2.82	101.75	2.11416	64	0.964	2.9	111.3	61
NMtnPr	Gleditsia triacanthos	GLTR	dbh	leaf area	sq. meters	1/dbh	quad	-40.0981	9.9757	0.06452			4.56	1642.82	972.681	59	0.858	2.4	2365.8	56
NMtnPr	Gleditsia triacanthos	GLTR	dbh	tree ht	meters	1/sqrt(dbh)	cub	1.38978	0.56667	-0.00591	3e-05		2.94	25.65	0.79471	63	0.904	4.5	29.5	59
NoEast	Gleditsia triacanthos	GLTR	dbh	age	years	1/dbh^2	lin	-2.08484	0.69231				1	150	0.02804	24	0.867	2	85	22
NoEast	Gleditsia triacanthos	GLTR	dbh	crown dia	meters	1	loglogw1	-0.48922	2.32541	0.01534			1.46	18.19	0.12384	33	0.969	1.1	19.3	31
NoEast	Gleditsia triacanthos	GLTR	dbh	crown ht	meters	1	quad	2.40141	0.26137	-0.00119			3.23	15.04	5.56132	34	0.718	0.7	18	31
NoEast	Gleditsia triacanthos	GLTR	cdia	dbh	meters	1/cdia^2	quad	0.72824	1.60241	0.11904			3.1	73.54	0.46563	34	0.938	5	94	31
NoEast	Gleditsia triacanthos	GLTR	age	dbh	centimeters	1	loglogw1	1.68387	1.59967	0.06782			3.23	71.86	0.26043	24	0.848	5	94	22
NoEast	Gleditsia triacanthos	GLTR	dbh	leaf area	sq. meters	1	loglogw1	-0.69993	4.96614	0.16329			4.04	753.08	0.4041	24	0.941	1.2	1038	22
NoEast	Gleditsia triacanthos	GLTR	dbh	tree ht	meters	1	quad	2.72568	0.40207	-0.00231			4	19.7	5.9453	34	0.805	2	22.5	31
TpIntW	Gleditsia triacanthos	GLTR	dbh	age	years	1/dbh^2	quad	-0.60131	0.62151	0.00392			0	89	0.02138	33	0.951	2	113	30
TpIntW	Gleditsia triacanthos	GLTR	dbh	crown dia	meters	1	loglogw1	-0.64034	2.46081	0.03001			0.94	21.1	0.17325	33	0.915	1.5	25.9	31
TpIntW	Gleditsia triacanthos	GLTR	dbh	crown ht	meters	1/dbh	lin	2.24907	0.21252				2.78	20.49	0.16211	33	0.849	2.5	26	31
TpIntW	Gleditsia triacanthos	GLTR	cdia	dbh	meters	1/cdia^2	cub	4.82106	-0.83652	0.44367	-0.01153		3.72	78	0.578	33	0.913	4.3	93.2	29
TpIntW	Gleditsia triacanthos	GLTR	age	dbh	centimeters	1/sqrt(age)	cub	2.49094	1.2233	0.00418	-8e-05		2.49	85.84	2.80552	33	0.977	4.3	93.2	29
TpIntW	Gleditsia triacanthos	GLTR	dbh	leaf area	sq. meters	1	loglogw1	-1.78175	5.91968	0.18475			0.96	1333.64	0.42982	29	0.913	2.7	2019.9	27
TpIntW	Gleditsia triacanthos	GLTR	dbh	tree ht	meters	1/dbh	lin	3.40896	0.25494				4.04	25.29	0.16914	33	0.886	4	28	31
NMtnPr	Gymnocladus dioicus	GYDI	dbh	age	years	1	lin	3.58564	0.70421				0	75	20.9886	31	0.817	0	51	29
NMtnPr	Gymnocladus dioicus	GYDI	dbh	crown dia	meters	1	cub	-0.98723	0.71893	-0.01472	0.00011		0.94	14.65	0.59736	30	0.937	2.5	14.6	26
NMtnPr	Gymnocladus dioicus	GYDI	dbh	crown ht	meters	1	cub	-1.74946	0.74463	-0.01399	0.0001		0.26	16	0.99165	30	0.922	1	16	26
NMtnPr	Gymnocladus dioicus	GYDI	cdia	dbh	meters	1	expow1	1.35494	0.19489	0.02587			2.84	71.29	0.16084	30	0.937	2.9	67.3	28
NMtnPr	Gymnocladus dioicus	GYDI	age	dbh	centimeters	1/age^2	lin	2.84088	0.9127				2.84	66.73	0.13396	31	0.852	2.9	67.3	29
NMtnPr	Gymnocladus dioicus	GYDI	dbh	leaf area	sq. meters	1/dbh^2	quad	-29.5518	8.10424	0.08153			2.02	874.3	9.4142	30	0.814	2.5	869.6	27
NMtnPr	Gymnocladus dioicus	GYDI	dbh	tree ht	meters	1	cub	-0.72202	0.81403	-0.01494	0.0001		1.47	17.9	1.21477	30	0.919	3	18	26
GulfCo	Ilex opaca	ILOP	dbh	age	years	1/dbh^2	cub	-7.63703	3.39474	-0.1696	0.00288		1	35	0.02205	37	0.95	0	40	33
GulfCo	Ilex opaca	ILOP	dbh	crown dia	meters	1/dbh^2	quad	0.07202	0.28414	-0.00229			0.78	7.79	0.00127	37	0.944	0.8	9.5	34
GulfCo	Ilex opaca	ILOP	dbh	crown ht	meters	1	loglogw1	-0.77752	2.29877	0.05786			0.83	9.57	0.24054	36	0.83	0.8	12	34
GulfCo	Ilex opaca	ILOP	cdia	dbh	meters	1	loglogw1	1.90024	2.00291	0.03392			2.7	40.14	0.18418	37	0.912	2.5	39.6	35
GulfCo	Ilex opaca	ILOP	age	dbh	centimeters	1/age^2	cub	2.53924	0.07682	0.08877	-0.00172		2.54	40.14	0.06408	37	0.933	2.5	39.6	33
GulfCo	Ilex opaca	ILOP	dbh	leaf area	sq. meters	1	loglogw1	-7.00874	8.2918	0.53597			0.11	86.04	0.7321	27	0.774	0.3	90.2	25
GulfCo	Ilex opaca	ILOP	dbh	tree ht	meters	1	loglogw1	-0.07365	1.89671	0.06102			1.52	11.38	0.24703	37	0.755	1.6	15	35
Piedmt	Ilex opaca	ILOP	dbh	age	years	1	loglogw1	-0.24434	3.03586	0.01841			1	60	0.13568	34	0.941	6	55	32
Piedmt	Ilex opaca	ILOP	dbh	crown dia	meters	1	lin	1.31918	0.12847				1.48	8.38	1.11295	33	0.743	1.7	9.9	31
Piedmt	Ilex opaca	ILOP	dbh	crown ht	meters	1	expow1	0.69646	0.04192	0.10051			2.22	21.16	0.31703	38	0.766	2	23	36
Piedmt	Ilex opaca	ILOP	cdia	dbh	meters	1/cdia	cub	25.4668	-12.7357	3.75655	-0.22632		1.26	55	9.38049	33	0.741	6.6	55.4	29
Piedmt	Ilex opaca	ILOP	age	dbh	centimeters	1/age^2	lin	0.35018	0.91075				1.26	55	0.01419	34	0.947	6.6	55.4	32
Piedmt	Ilex opaca	ILOP	dbh	leaf area	sq. meters	1	loglogw1	-9.24323	10.1966	0.59775			0.33	294.95	0.77315	30	0.811	0.6	285.3	28
Piedmt	Ilex opaca	ILOP	dbh	tree ht	meters	1	expow1	0.99411	0.03554	0.09418			2.96	20	0.30688	33	0.701	3	25	31
Tropic	Ilex paraguariensis	ILPA2	dbh	age	years	1	quad	6.76986	1.67543	-0.01461			0	62	116.877	36	0.49	0.1	55	33
Tropic	Ilex paraguariensis	ILPA2	dbh	crown dia	meters	1/dbh	lin	0.94213	0.15046				1.19	7.81	0.04592	35	0.815	1	11.2	33
Tropic	Ilex paraguariensis	ILPA2	dbh	crown ht	meters	1/sqrt(dbh)	quad	0.3096	0.16223	-0.00176			0.58	4.05	0.18538	35	0.532	0.5	5	32
Tropic	Ilex paraguariensis	ILPA2	cdia	dbh	meters	1/cdia	lin	-0.57701	5.39426				2.86	45.67	10.2477	35	0.74	1.8	56.4	33
Tropic	Ilex paraguariensis	ILPA2	age	dbh	centimeters	1/age^2	cub	1.679	1.21217	-0.03124	0.00037		1.68	45.67	0.06088	36	0.859	1.8	56.4	32
Tropic	Ilex paraguariensis	ILPA2	dbh	leaf area	sq. meters	1	loglogw1	-3.23886	5.10371	0.89822			0.25	66.43	0.94774	35	0.628	0.3	77	33
Tropic	Ilex paraguariensis	ILPA2	dbh	tree ht	meters	1/dbh	quad	1.10095	0.25404	-0.00195			1.52	8.63	0.0677	35	0.795	1.5	9.5	32
InlEmp	Jacaranda mimosifolia	JAMI	dbh	age	years	1/dbh^2	cub	-1.41006	0.69075	-0.01366	0.00039		0	66	0.01808	63	0.949	0	55	59
InlEmp	Jacaranda mimosifolia	JAMI	dbh	crown dia	meters	1/dbh	quad	1.83155	0.28614	-0.00136			2.4	15.15	0.07778	63	0.887	2.3	15.2	60
InlEmp	Jacaranda mimosifolia	JAMI	dbh	crown ht	meters	1	loglogw1	-0.00134	1.68344	0.04504			1.21	11.53	0.00203	63	0.807	1.5	13.5	61
InlEmp	Jacaranda mimosifolia	JAMI	cdia	dbh	meters	1/cdia^2	quad	-11.5606	5.82312	-0.11904			2	50	0.42648	63	0.902	2	55.4	60
InlEmp	Jacaranda mimosifolia	JAMI	age	dbh	centimeters	1/sqrt(age)	cub	2.00317	2.47309	-0.05587	0.00051		2	69.4	3.18925	63	0.971	2	55.4	59
InlEmp	Jacaranda mimosifolia	JAMI	dbh	leaf area	sq. meters	1	loglogw1	-1.37513	5.43609	0.18051			4.8	724.86	0.03258	34	0.892	3.9	591.3	32
InlEmp	Jacaranda mimosifolia	JAMI	dbh	tree ht	meters	1/dbh	quad	2.51941	0.34807	-0.00252			3.21	14.52	0.07485	63	0.901	3	17	60
SoCalC	Jacaranda mimosifolia	JAMI	dbh	age	years	1	loglogw1	-1.26073	3.91538	0.10672			0	75	0.32668	32	0.937	1	70	30
SoCalC	Jacaranda mimosifolia	JAMI	dbh	crown dia	meters	1/dbh	quad	0.48967	0.33701	-0.00199			1.38	13.66	0.04677	32	0.939	1.1	13.3	29
SoCalC	Jacaranda mimosifolia	JAMI	dbh	crown ht	meters	1/dbh	lin	0.75715	0.1252				1.09	8.43	0.05453	32	0.766	1	9	30
SoCalC	Jacaranda mimosifolia	JAMI	cdia	dbh	meters	1/cdia^2	quad	-0.02436	2.45048	0.11015			2.68	61.31	0.46527	32	0.918	3	58	29
SoCalC	Jacaranda mimosifolia	JAMI	age	dbh	centimeters	1/age^2	lin	2.67791	0.78174				2.68	61.31	0.0529	32	0.892	3	58	30
SoCalC	Jacaranda mimosifolia	JAMI	dbh	leaf area	sq. meters	1	loglogw1	-1.56175	5.07775	0.73825			2.85	435.7	0.85921	32	0.783	0.6	519.5	30
SoCalC	Jacaranda mimosifolia	JAMI	dbh	tree ht	meters	1/dbh	lin	2.78424	0.16145				3.22	12.68	0.04647	32	0.865	3	13	30
LoMidW	Juglans nigra	JUNI	dbh	age	years	1/dbh^2	lin	-1.16343	0.93575				2	115	0.03585	57	0.931	3	105	55
LoMidW	Juglans nigra	JUNI	dbh	crown dia	meters	1/dbh	quad	0.80775	0.30997	-0.00145			1.32	17.26	0.08245	34	0.949	1	21.3	31
LoMidW	Juglans nigra	JUNI	dbh	crown ht	meters	1	loglogw1	0.30599	1.67545	0.08803			1.41	17.71	0.29669	34	0.848	0.5	26	32
LoMidW	Juglans nigra	JUNI	cdia	dbh	meters	1	loglogw1	0.97851	3.10081	0.06627			1.6	100.48	0.06627	34	0.939	1	96.8	32
LoMidW	Juglans nigra	JUNI	age	dbh	centimeters	1	loglogw1	0.18691	2.80787	0.04201			1.66	97.17	0.20496	57	0.934	1	96.8	55
LoMidW	Juglans nigra	JUNI	dbh	leaf area	sq. meters	1	loglogw1	0.54511	4.11293	0.28178			2.72	1026.82	0.53083	34	0.913	0.4	1837.3	32
LoMidW	Juglans nigra	JUNI	dbh	tree ht	meters	1	loglogw1	0.75543	1.48185	0.07415			2.17	20.58	0.27231	34	0.838	1	28	32
TpIntW	Juglans nigra	JUNI	dbh	age	years	1/dbh^2	lin	-1.16343	0.93575				2	115	0.03585	57	0.931	3	105	55
TpIntW	Juglans nigra	JUNI	dbh	crown dia	meters	1/dbh	cub	0.558	0.44195	-0.00517	3e-05		1.28	20.87	0.07685	54	0.918	1.9	23.8	50
TpIntW	Juglans nigra	JUNI	dbh	crown ht	meters	1/dbh	quad	1.73543	0.31017	-0.00136			2.25	19.06	0.15595	53	0.846	2.5	24.5	50
TpIntW	Juglans nigra	JUNI	cdia	dbh	meters	1/cdia^2	cub	3.92837	-0.34213	0.4772	-0.01297		1.6	85	0.64277	54	0.913	4.1	120.7	50
TpIntW	Juglans nigra	JUNI	age	dbh	centimeters	1	loglogw1	0.18691	2.80787	0.04201			1.66	97.17	0.20496	57	0.934	4.1	120.7	55
TpIntW	Juglans nigra	JUNI	dbh	leaf area	sq. meters	1	loglogw1	-0.65048	4.80257	0.4015			1.14	963.29	0.63364	49	0.72	12.9	1755.2	47
TpIntW	Juglans nigra	JUNI	dbh	tree ht	meters	1	loglogw1	0.11898	1.93702	0.04543			1.13	21.74	0.21314	53	0.822	4	27	51
GulfCo	Juniperus virginiana	JUVI	dbh	age	years	1	lin	12.9222	0.41075				1	55	50.6859	43	0.58	0	60	41
GulfCo	Juniperus virginiana	JUVI	dbh	crown dia	meters	1	loglogw1	-0.634	1.9623	0.05261			0.87	10.03	0.22938	43	0.841	1	13.1	41
GulfCo	Juniperus virginiana	JUVI	dbh	crown ht	meters	1	cub	0.55035	0.47302	-0.01036	7e-05		1.68	8.32	3.14142	43	0.349	1.5	11.5	39
GulfCo	Juniperus virginiana	JUVI	cdia	dbh	meters	1	loglogw1	1.72093	2.67191	0.08593			3.32	84.3	0.29314	43	0.869	2.5	81.3	41
GulfCo	Juniperus virginiana	JUVI	age	dbh	centimeters	1/age^2	quad	2.53228	0.77567	0.01293			2.53	84.3	0.26005	43	0.822	2.5	81.3	40
GulfCo	Juniperus virginiana	JUVI	dbh	leaf area	sq. meters	1	loglogw1	-5.52175	7.08015	0.49953			0.18	202.16	0.70677	37	0.761	0.3	199.8	35
GulfCo	Juniperus virginiana	JUVI	dbh	tree ht	meters	1	cub	-0.3202	0.5955	-0.01222	8e-05		1.11	13.14	3.24355	43	0.623	1.5	14	39
Piedmt	Juniperus virginiana	JUVI	dbh	age	years	1/dbh^2	lin	0.96454	0.62588				3	67	0.00769	38	0.97	3	60	36
Piedmt	Juniperus virginiana	JUVI	dbh	crown dia	meters	1/dbh	quad	0.69545	0.15672	-0.00051			1.21	10.39	0.03092	38	0.908	0.9	12.3	35
Piedmt	Juniperus virginiana	JUVI	dbh	crown ht	meters	1/sqrt(dbh)	cub	-0.98342	0.60891	-0.01049	7e-05		0.93	19.38	0.75795	38	0.857	0.5	20	34
Piedmt	Juniperus virginiana	JUVI	cdia	dbh	meters	1	loglogw1	2.034	2.50629	0.07886			3.28	86.34	0.28081	38	0.894	2.5	89.4	36
Piedmt	Juniperus virginiana	JUVI	age	dbh	centimeters	1	loglogw1	0.21415	2.93762	0.02967			3.34	85.95	0.17225	38	0.96	2.5	89.4	36
Piedmt	Juniperus virginiana	JUVI	dbh	leaf area	sq. meters	1	loglogw1	-6.54259	8.14197	0.451			0.48	383.58	0.67157	33	0.931	0	380.5	31
Piedmt	Juniperus virginiana	JUVI	dbh	tree ht	meters	1	cub	-1.15219	0.7686	-0.01386	0.0001		1.26	23.96	4.88014	38	0.846	1	24	34
CenFla	Juniperus virginiana var. silicicola	JUSI	dbh	age	years	1	loglogw1	-0.28355	2.65266	0.08125			2	44	0.28504	48	0.857	2	94	46
CenFla	Juniperus virginiana var. silicicola	JUSI	dbh	crown dia	meters	1/sqrt(dbh)	quad	0.46627	0.25589	-0.00147			0.73	11.56	0.29839	50	0.884	0.5	14.5	47
CenFla	Juniperus virginiana var. silicicola	JUSI	dbh	crown ht	meters	1	quad	1.54184	0.18679	-0.00117			1.73	9.01	2.57001	50	0.647	1	12.5	47
CenFla	Juniperus virginiana var. silicicola	JUSI	cdia	dbh	meters	1/cdia^2	quad	0.97463	3.30955	0.23423			2.71	80.53	3.03215	50	0.865	2.8	100.1	47
CenFla	Juniperus virginiana var. silicicola	JUSI	age	dbh	centimeters	1/age	cub	-0.6109	1.63311	0.0145	-0.00022		1.04	80.53	3.59068	48	0.905	2.8	100.1	44
CenFla	Juniperus virginiana var. silicicola	JUSI	dbh	leaf area	sq. meters	1	loglogw1	-2.58187	5.7126	0.33825			0.71	422.63	0.58159	46	0.856	0.1	849.8	44
CenFla	Juniperus virginiana var. silicicola	JUSI	dbh	tree ht	meters	1/sqrt(dbh)	quad	1.94014	0.25408	-0.00159			2.2	12.1	0.50324	50	0.792	1.5	15	47
CenFla	Koelreuteria elegans	KOELFO	dbh	age	years	1/dbh^2	quad	2.22523	0.25901	0.00364			0	46	0.0231	40	0.801	3	50	37
CenFla	Koelreuteria elegans	KOELFO	dbh	crown dia	meters	1/dbh	lin	1.91565	0.19718				2.22	14.41	0.07759	41	0.874	2.3	17.8	39
CenFla	Koelreuteria elegans	KOELFO	dbh	crown ht	meters	1	lin	2.28049	0.10226				2.44	8.76	1.89243	41	0.652	1.5	11	39
CenFla	Koelreuteria elegans	KOELFO	cdia	dbh	meters	1	loglogw1	1.08173	2.98561	0.06491			1.55	63.37	0.25478	41	0.867	4.8	69.6	39
CenFla	Koelreuteria elegans	KOELFO	age	dbh	centimeters	1	quad	1.54502	2.71251	-0.02975			1.55	63.37	66.0984	40	0.804	4.8	69.6	37
CenFla	Koelreuteria elegans	KOELFO	dbh	leaf area	sq. meters	1/dbh^2	quad	6.4534	0.20579	0.10299			7.02	433.08	5.01046	39	0.756	1.2	813.4	36
CenFla	Koelreuteria elegans	KOELFO	dbh	tree ht	meters	1	lin	4.44294	0.11553				4.62	11.76	2.9371	41	0.606	3	13.5	39
InlVal	Koelreuteria paniculata	KOPA	dbh	age	years	1/dbh	quad	-2.18852	1.34187	-0.00945			0	50	0.77278	31	0.932	0	50	28
InlVal	Koelreuteria paniculata	KOPA	dbh	crown dia	meters	1	loglogw1	-0.30329	1.94526	0.02743			1.19	11.74	0.16562	31	0.95	0.9	14.8	29
InlVal	Koelreuteria paniculata	KOPA	dbh	crown ht	meters	1/sqrt(dbh)	lin	1.1246	0.17654				1.57	11.94	0.21463	31	0.909	1	11.5	29
InlVal	Koelreuteria paniculata	KOPA	cdia	dbh	meters	1/cdia^2	cub	2.86909	-1.32014	1.06867	-0.05215		1.19	11.74	0.3312	31	0.949	2.5	60	27
InlVal	Koelreuteria paniculata	KOPA	age	dbh	centimeters	1/age^2	quad	2.53372	0.62574	0.01098			2.53	61.28	0.08669	31	0.886	2.5	60	28
InlVal	Koelreuteria paniculata	KOPA	dbh	leaf area	sq. meters	1/dbh^2	quad	-4.08866	2.1834	0.06252			1.84	364.45	1.54048	31	0.858	1.6	290	28
InlVal	Koelreuteria paniculata	KOPA	dbh	tree ht	meters	1/sqrt(dbh)	quad	2.1107	0.29037	-0.00151			2.84	14.23	0.14424	31	0.956	1.8	14	28
InterW	Koelreuteria paniculata	KOPA	dbh	age	years	1/dbh^2	cub	16.0239	-2.55707	0.18609	-0.00259		1	63	0.02343	28	0.933	6	47	24
InterW	Koelreuteria paniculata	KOPA	dbh	crown dia	meters	1	quad	-0.00913	0.34408	-0.00301			1.99	9.69	0.20642	28	0.952	2.2	9.6	25
InterW	Koelreuteria paniculata	KOPA	dbh	crown ht	meters	1/sqrt(dbh)	loglogw2	-1.19416	2.26121	0.00491			1.41	6.85	0.0701	28	0.875	1.5	7	26
InterW	Koelreuteria paniculata	KOPA	cdia	dbh	meters	1/cdia	quad	5.13249	0.53409	0.36383			6.86	50.51	0.83062	28	0.954	6.6	45.5	25
InterW	Koelreuteria paniculata	KOPA	age	dbh	centimeters	1/age	lin	6.15527	0.704				6.16	50.51	0.54466	28	0.89	6.6	45.5	26
InterW	Koelreuteria paniculata	KOPA	dbh	leaf area	sq. meters	1	loglogw1	-8.09717	9.3812	0.21873			0.29	133.74	0.46769	28	0.916	0.2	128.1	26
InterW	Koelreuteria paniculata	KOPA	dbh	tree ht	meters	1/sqrt(dbh)	lin	3.08556	0.12147				3.83	9.22	0.0645	28	0.839	3.5	9	26
CenFla	Lagerstroemia indica	LAIN	dbh	age	years	1/dbh	lin	2.13037	0.34447				0	30	0.42746	34	0.726	3	30	32
CenFla	Lagerstroemia indica	LAIN	dbh	crown dia	meters	1/sqrt(dbh)	lin	1.84312	0.11695				2.51	9.37	0.47249	35	0.596	1.5	9.5	33
CenFla	Lagerstroemia indica	LAIN	dbh	crown ht	meters	1/sqrt(dbh)	lin	1.28193	0.07279				1.7	5.97	0.39619	35	0.4	0.5	8.5	33
CenFla	Lagerstroemia indica	LAIN	cdia	dbh	meters	1/sqrt(cdia)	lin	2.08409	5.16307				5.71	64.39	47.9255	35	0.582	4.1	60.7	33
CenFla	Lagerstroemia indica	LAIN	age	dbh	centimeters	1	lin	5.70526	1.95628				5.71	64.39	65.5992	34	0.714	4.1	60.7	32
CenFla	Lagerstroemia indica	LAIN	dbh	leaf area	sq. meters	1	loglogw1	-2.64729	5.23174	1.00334			6.98	227.96	1.00167	34	0.586	0.9	291.6	32
CenFla	Lagerstroemia indica	LAIN	dbh	tree ht	meters	1/sqrt(dbh)	lin	2.40476	0.10047				2.98	8.87	0.70561	35	0.417	1.5	13.5	33
GulfCo	Lagerstroemia indica	LAIN	dbh	age	years	1/dbh	lin	0.43843	0.7043				0	50	1.97798	42	0.752	0	50	40
GulfCo	Lagerstroemia indica	LAIN	dbh	crown dia	meters	1/dbh^2	cub	0.0129	0.43959	-0.00933	7e-05		1.57	7.4	0.0037	42	0.765	0.9	8.8	38
GulfCo	Lagerstroemia indica	LAIN	dbh	crown ht	meters	1/dbh	quad	0.61728	0.20646	-0.00182			1.39	6.47	0.07953	42	0.676	0.5	9	39
GulfCo	Lagerstroemia indica	LAIN	cdia	dbh	meters	1	loglogw1	1.74834	2.3726	0.16653			3.85	62.52	0.40808	42	0.698	2.5	76.6	40
GulfCo	Lagerstroemia indica	LAIN	age	dbh	centimeters	1/sqrt(age)	lin	3.85142	1.17328				3.85	62.52	22.5011	42	0.809	2.5	76.6	40
GulfCo	Lagerstroemia indica	LAIN	dbh	leaf area	sq. meters	1	loglogw1	-3.81587	4.94589	1.44183			1.36	55.49	1.20076	39	0.485	0.1	78	37
GulfCo	Lagerstroemia indica	LAIN	dbh	tree ht	meters	1	loglogw1	0.21722	1.42863	0.03232			2.42	9.55	0.17978	40	0.813	2	12	38
InlEmp	Lagerstroemia indica	LAIN	dbh	age	years	1/dbh	cub	-4.65756	1.60361	0.05223	-0.00139		0	65	0.90321	61	0.966	0	65	57
InlEmp	Lagerstroemia indica	LAIN	dbh	crown dia	meters	1/dbh	lin	1.6479	0.22012				2.26	9.25	0.05045	61	0.864	1.9	10.3	59
InlEmp	Lagerstroemia indica	LAIN	dbh	crown ht	meters	1/dbh	lin	0.80456	0.1894				1.33	7.35	0.09044	61	0.724	0.5	10.5	59
InlEmp	Lagerstroemia indica	LAIN	cdia	dbh	meters	1/cdia^2	lin	-4.71613	4.05211				2.79	34.54	0.57243	61	0.846	2.6	33.9	59
InlEmp	Lagerstroemia indica	LAIN	age	dbh	centimeters	1/sqrt(age)	lin	2.78513	0.48853				2.79	34.54	0.81649	61	0.976	2.6	33.9	59
InlEmp	Lagerstroemia indica	LAIN	dbh	leaf area	sq. meters	1	loglogw1	-0.15182	4.39671	0.17646			4.84	252.73	0.03114	33	0.911	1.6	577.1	31
InlEmp	Lagerstroemia indica	LAIN	dbh	tree ht	meters	1	expow1	1.18647	0.03461	0.0306			3.66	10.99	0.00094	61	0.769	2.5	13.5	59
InlVal	Lagerstroemia indica	LAIN	dbh	age	years	1/sqrt(dbh)	cub	-9.44372	5.3451	-0.22305	0.00349		0	84	14.5768	28	0.764	0	52	24
InlVal	Lagerstroemia indica	LAIN	dbh	crown dia	meters	1	loglogw1	-0.27841	1.74771	0.0854			1.21	7.21	0.29223	28	0.74	0.7	7.1	26
InlVal	Lagerstroemia indica	LAIN	dbh	crown ht	meters	1	quad	0.21994	0.28457	-0.00356			0.92	5.82	0.34081	28	0.853	0.7	6	25
InlVal	Lagerstroemia indica	LAIN	cdia	dbh	meters	1/cdia^2	lin	-0.48667	3.44952				1.21	7.21	1.08096	28	0.801	2.5	35.2	26
InlVal	Lagerstroemia indica	LAIN	age	dbh	centimeters	1/age^2	lin	2.53611	0.38823				2.54	35.15	0.03464	28	0.8	2.5	35.2	26
InlVal	Lagerstroemia indica	LAIN	dbh	leaf area	sq. meters	1	loglogw1	-0.75006	4.13711	0.43466			2.39	118.91	0.65928	28	0.758	0.6	114.6	26
InlVal	Lagerstroemia indica	LAIN	dbh	tree ht	meters	1	quad	1.78206	0.28887	-0.00349			2.49	7.63	0.13807	28	0.372	2.1	7.8	25
SacVal	Lagerstroemia indica	LAIN	dbh	age	years	1	loglogw1	-2.7049	5.28435	0.2628	0.06906		0	63	0.51264	26	0.973	0.1	64	24
SacVal	Lagerstroemia indica	LAIN	dbh	crown dia	meters	1	loglogw1	-0.30397	1.86299	0.06698			0.94	8.68	0.25881	28	0.811	0.9	10.4	26
SacVal	Lagerstroemia indica	LAIN	dbh	crown ht	meters	1	lin	2.54076	0.10439				2.75	6.75	0.82099	28	0.614	1.7	7.5	26
SacVal	Lagerstroemia indica	LAIN	cdia	dbh	meters	1/cdia^2	lin	-1.18032	3.76366				3.22	40.37	1.12954	28	0.84	2.1	42	26
SacVal	Lagerstroemia indica	LAIN	age	dbh	centimeters	1/age	cub	2.02636	1.21727	-0.02189	0.00019		2.03	40.37	0.28049	26	0.974	2.1	42	22
SacVal	Lagerstroemia indica	LAIN	dbh	leaf area	sq. meters	1	loglogw1	-0.91994	4.46094	0.28072			1.07	165.45	0.52983	27	0.858	0.7	221	25
SacVal	Lagerstroemia indica	LAIN	dbh	tree ht	meters	1	lin	3.60759	0.12892				3.87	8.81	1.01437	28	0.663	2.7	10	26
Tropic	Lagerstroemia speciosa	LASP	dbh	age	years	1/dbh^2	quad	-3.92018	1.62797	-0.01598			0	50	0.04067	37	0.936	0.1	45	34
Tropic	Lagerstroemia speciosa	LASP	dbh	crown dia	meters	1/dbh	quad	0.81287	0.29024	-0.00141			1.51	13.66	0.05502	37	0.923	1.2	17.2	34
Tropic	Lagerstroemia speciosa	LASP	dbh	crown ht	meters	1/sqrt(dbh)	loglogw2	-0.66845	1.92319	0.01414			0.77	8.5	0.11891	36	0.876	0.8	12	34
Tropic	Lagerstroemia speciosa	LASP	cdia	dbh	meters	1	loglogw1	1.28769	2.70826	0.24229			3.24	64.51	0.0587	37	0.904	2.5	70.6	35
Tropic	Lagerstroemia speciosa	LASP	age	dbh	centimeters	1/age^2	quad	2.41782	0.81691	0.0085			2.42	64.51	0.11521	37	0.896	2.5	70.6	34
Tropic	Lagerstroemia speciosa	LASP	dbh	leaf area	sq. meters	1	loglogw1	-2.00719	5.27264	0.41463			0.91	327.71	0.64391	35	0.834	0.8	410.7	33
Tropic	Lagerstroemia speciosa	LASP	dbh	tree ht	meters	1	loglogw1	-0.04352	1.85424	0.02745			1.43	13.68	0.16568	36	0.902	1.2	14.5	34
Piedmt	Lagerstroemia spp.	LA6	dbh	age	years	1/dbh	cub	-3.80986	1.76911	-0.04873	0.00051		0	36	0.0949	40	0.909	0	30	36
Piedmt	Lagerstroemia spp.	LA6	dbh	crown dia	meters	1	loglogw1	-0.76231	2.24828	0.07344			0.84	10.61	0.271	40	0.814	0.8	11.7	38
Piedmt	Lagerstroemia spp.	LA6	dbh	crown ht	meters	1	loglogw1	-0.36837	1.59001	0.09864			1.07	6.34	0.31407	39	0.618	0.8	9.5	37
Piedmt	Lagerstroemia spp.	LA6	cdia	dbh	meters	1	loglogw1	1.84148	2.01972	0.10145			2.87	52.36	0.31851	40	0.803	2.5	55	38
Piedmt	Lagerstroemia spp.	LA6	age	dbh	centimeters	1/age^2	cub	2.53768	0.23253	0.10404	-0.002		2.54	52.36	0.11725	40	0.936	2.5	55	36
Piedmt	Lagerstroemia spp.	LA6	dbh	leaf area	sq. meters	1	loglogw1	-6.0069	7.62665	0.94258			0.41	168.58	0.97087	39	0.8	0	165.6	37
Piedmt	Lagerstroemia spp.	LA6	dbh	tree ht	meters	1/dbh	loglogw3	0.20952	1.44069	0.0022			1.73	9.55	0.04695	40	0.883	1.8	12.5	38
CenFla	Liquidambar styraciflua	LIST	dbh	age	years	1/dbh^2	cub	0.83572	0.50777	-0.00382	7e-05		2	70	0.01046	48	0.945	3	59	44
CenFla	Liquidambar styraciflua	LIST	dbh	crown dia	meters	1/dbh^2	quad	0.45464	0.24185	-0.00054			0.67	19.14	0.00142	48	0.955	1	21.5	45
CenFla	Liquidambar styraciflua	LIST	dbh	crown ht	meters	1/dbh	quad	1.11401	0.30842	-0.00196			1.38	13.26	0.13414	48	0.819	2	19	45
CenFla	Liquidambar styraciflua	LIST	cdia	dbh	meters	1	loglogw1	1.6463	2.49347	0.03465			2.8	99.73	0.18615	48	0.942	2.3	93.2	46
CenFla	Liquidambar styraciflua	LIST	age	dbh	centimeters	1	loglogw1	0.76105	2.6362	0.03839			0.88	99	0.19595	48	0.936	2.3	93.2	46
CenFla	Liquidambar styraciflua	LIST	dbh	leaf area	sq. meters	1	loglogw1	-2.1608	5.76918	0.28756			1.18	903.14	0.53625	48	0.878	0.5	1778.8	46
CenFla	Liquidambar styraciflua	LIST	dbh	tree ht	meters	1	loglogw1	0.19747	1.82322	0.04927			0.56	19.92	0.22196	48	0.806	2.5	25	46
GulfCo	Liquidambar styraciflua	LIST	dbh	age	years	1/dbh^2	cub	-2.93253	1.10541	-0.01942	0.00016		1	69	0.03008	50	0.873	0	70	46
GulfCo	Liquidambar styraciflua	LIST	dbh	crown dia	meters	1/dbh^2	quad	0.34323	0.24821	-0.00095			0.98	14.49	0.00181	50	0.928	1	19.7	47
GulfCo	Liquidambar styraciflua	LIST	dbh	crown ht	meters	1/dbh^2	quad	0.00785	0.51171	-0.00336			1.32	19.47	0.00624	50	0.916	1.4	25	47
GulfCo	Liquidambar styraciflua	LIST	cdia	dbh	meters	1	loglogw1	1.77607	2.43851	0.06647			4.94	84.26	0.25782	50	0.92	2.5	97.5	48
GulfCo	Liquidambar styraciflua	LIST	age	dbh	centimeters	1/sqrt(age)	quad	2.60246	2.35752	-0.01702			2.6	84.26	30.3062	50	0.891	2.5	97.5	47
GulfCo	Liquidambar styraciflua	LIST	dbh	leaf area	sq. meters	1/dbh	loglogw3	-7.06568	9.05533	0.01204			0.16	1044.6	0.10972	36	0.962	0.4	2098.4	34
GulfCo	Liquidambar styraciflua	LIST	dbh	tree ht	meters	1	loglogw1	0.04347	2.11814	0.03281			1.81	24.81	0.18113	50	0.924	2.1	29	48
InlEmp	Liquidambar styraciflua	LIST	dbh	age	years	1/dbh^2	lin	-2.23131	0.94906				0	100	0.0429	38	0.933	0	70	36
InlEmp	Liquidambar styraciflua	LIST	dbh	crown dia	meters	1/dbh	cub	1.54158	0.58462	-0.00943	7e-05		2.94	18.83	0.0868	38	0.936	2.8	19.8	34
InlEmp	Liquidambar styraciflua	LIST	dbh	crown ht	meters	1/dbh	cub	1.7242	0.51029	-0.00877	7e-05		2.94	17.02	0.10404	38	0.899	2.8	18	34
InlEmp	Liquidambar styraciflua	LIST	cdia	dbh	meters	1	loglogw1	-0.33889	4.01341	0.06754			2.49	69.6	0.00456	38	0.905	2.5	74.7	36
InlEmp	Liquidambar styraciflua	LIST	age	dbh	centimeters	1/age^2	quad	2.48674	1.32423	-0.00653			2.49	69.6	0.0829	38	0.931	2.5	74.7	35
InlEmp	Liquidambar styraciflua	LIST	dbh	leaf area	sq. meters	1/dbh^2	cub	-3.55804	4.92387	-0.07013	0.00263		8.29	887.03	4.16913	35	0.897	8.7	1075.6	31
InlEmp	Liquidambar styraciflua	LIST	dbh	tree ht	meters	1/dbh	cub	1.35897	0.65896	-0.0101	7e-05		2.94	20.64	0.088	38	0.95	2.8	22	34
InlVal	Liquidambar styraciflua	LIST	dbh	age	years	1	cub	-0.69703	1.44307	-0.02099	0.00012		0	65	26.2801	32	0.846	0	80	28
InlVal	Liquidambar styraciflua	LIST	dbh	crown dia	meters	1	quad	0.54299	0.25182	-0.0011			1.17	13.66	1.61601	32	0.834	1	15	29
InlVal	Liquidambar styraciflua	LIST	dbh	crown ht	meters	1/sqrt(dbh)	lin	2.61875	0.23213				3.21	21.24	1.13097	32	0.789	1.5	28.5	30
InlVal	Liquidambar styraciflua	LIST	cdia	dbh	meters	1/sqrt(cdia)	cub	-12.9873	15.6914	-2.11419	0.10852		1.17	13.66	16.2737	32	0.902	2.5	120	28
InlVal	Liquidambar styraciflua	LIST	age	dbh	centimeters	1/age^2	lin	2.52804	1.19535				2.53	80.23	0.11043	32	0.924	2.5	120	30
InlVal	Liquidambar styraciflua	LIST	dbh	leaf area	sq. meters	1	loglogw1	-0.53587	4.69271	0.2306			2.62	689.1	0.48021	32	0.819	3.3	1123	30
InlVal	Liquidambar styraciflua	LIST	dbh	tree ht	meters	1	lin	4.09398	0.26345				4.76	25.23	5.53195	32	0.866	2.2	34	30
NoCalC	Liquidambar styraciflua	LIST	dbh	age	years	1/dbh	cub	-0.75457	1.01542	-0.00924	9e-05		0	100	0.75669	37	0.944	0	100	33
NoCalC	Liquidambar styraciflua	LIST	dbh	crown dia	meters	1/dbh	quad	0.42238	0.29796	-0.00131			1.25	17.17	0.06011	37	0.945	0.7	17.4	34
NoCalC	Liquidambar styraciflua	LIST	dbh	crown ht	meters	1/dbh	cub	-0.54095	0.53287	-0.00872	5e-05		0.89	16.49	0.20479	37	0.814	0.3	17.3	33
NoCalC	Liquidambar styraciflua	LIST	cdia	dbh	meters	1/cdia^2	cub	1.76099	0.82463	0.52214	-0.01992		2.8	62	0.6964	37	0.936	2.5	100	33
NoCalC	Liquidambar styraciflua	LIST	age	dbh	centimeters	1/age	quad	2.80359	1.29151	-0.00299			2.8	102.01	1.62906	37	0.959	2.5	100	34
NoCalC	Liquidambar styraciflua	LIST	dbh	leaf area	sq. meters	1	loglogw1	-1.47634	5.49634	0.29671			2	1243.85	0.54471	33	0.917	0.2	1163.7	31
NoCalC	Liquidambar styraciflua	LIST	dbh	tree ht	meters	1/dbh	cub	0.57478	0.62687	-0.00837	4e-05		2.27	22.71	0.20583	37	0.896	1.2	22.5	33
NoEast	Liquidambar styraciflua	LIST	dbh	age	years	1/dbh	lin	-2.20877	1.32556				0	150	5.48442	94	0.847	2	135	92
NoEast	Liquidambar styraciflua	LIST	dbh	crown dia	meters	1/dbh^2	quad	0.20226	0.2869	-0.0009			1.17	17.39	0.00141	41	0.961	1	23.8	38
NoEast	Liquidambar styraciflua	LIST	dbh	crown ht	meters	1/dbh^2	quad	0.78667	0.28607	-0.0012			1.75	16.03	0.00304	41	0.905	1.5	23	38
NoEast	Liquidambar styraciflua	LIST	cdia	dbh	meters	1/cdia^2	lin	-1.73388	4.54454				3.42	80.14	0.80537	41	0.939	2.2	111.8	39
NoEast	Liquidambar styraciflua	LIST	age	dbh	centimeters	1/age	quad	3.42364	0.88982	-0.00252			3.42	80.14	2.33638	94	0.855	2.2	111.8	91
NoEast	Liquidambar styraciflua	LIST	dbh	leaf area	sq. meters	1/dbh^2	quad	-4.47012	1.90089	0.10895			3.31	847.69	6.48252	23	0.871	1.3	1507.1	20
NoEast	Liquidambar styraciflua	LIST	dbh	tree ht	meters	1/dbh^2	cub	1.22713	0.4387	-0.00425	2e-05		2.68	20.52	0.0039	41	0.924	2.2	27	37
PacfNW	Liquidambar styraciflua	LIST	dbh	age	years	1/dbh	cub	0.75623	0.27517	0.01399	-0.00016		0	40	0.25393	73	0.965	1	34	69
PacfNW	Liquidambar styraciflua	LIST	dbh	crown dia	meters	1/dbh	quad	0.41201	0.27728	-0.00101			0.97	14.57	0.03568	73	0.97	0.6	17.5	70
PacfNW	Liquidambar styraciflua	LIST	dbh	crown ht	meters	1/dbh	quad	0.89761	0.40549	-0.00264			1.71	16.25	0.13144	73	0.93	1	22	70
PacfNW	Liquidambar styraciflua	LIST	cdia	dbh	meters	1/cdia^2	lin	-1.81154	4.27467				2.02	67.66	0.42044	73	0.967	1	74.4	71
PacfNW	Liquidambar styraciflua	LIST	age	dbh	centimeters	1/sqrt(age)	lin	2.02364	1.64102				2.02	67.66	6.55405	73	0.941	1	74.4	71
PacfNW	Liquidambar styraciflua	LIST	dbh	leaf area	sq. meters	1/dbh^2	cub	0.61572	-0.63818	0.47404	-0.00342		1.24	1069.61	9.75177	72	0.929	0.1	1414.7	68
PacfNW	Liquidambar styraciflua	LIST	dbh	tree ht	meters	1/dbh	quad	1.37134	0.5091	-0.00376			2.39	18.61	0.11423	73	0.955	1.5	24	70
Piedmt	Liquidambar styraciflua	LIST	dbh	age	years	1/dbh	quad	0.50045	0.55433	-0.00082			2	60	0.11091	43	0.982	3	55	40
Piedmt	Liquidambar styraciflua	LIST	dbh	crown dia	meters	1/dbh	lin	1.18893	0.19189				1.63	24.48	0.0785	43	0.927	2	28.7	41
Piedmt	Liquidambar styraciflua	LIST	dbh	crown ht	meters	1	loglogw1	-0.04355	2.13818	0.04898			1.46	27.78	0.22132	43	0.848	4	30	41
Piedmt	Liquidambar styraciflua	LIST	cdia	dbh	meters	1/sqrt(cdia)	quad	-8.57305	6.7567	-0.08577			2.3	121.37	25.6858	43	0.922	5.6	114.8	40
Piedmt	Liquidambar styraciflua	LIST	age	dbh	centimeters	1/age	lin	-1.80388	2.05295				2.3	121.37	1.14615	43	0.978	5.6	114.8	41
Piedmt	Liquidambar styraciflua	LIST	dbh	leaf area	sq. meters	1	loglogw1	-6.21471	8.95477	0.64887			1	4582.16	0.80553	29	0.876	1.3	4521.1	27
Piedmt	Liquidambar styraciflua	LIST	dbh	tree ht	meters	1	loglogw1	0.19987	2.1283	0.03236			1.83	34.77	0.17989	43	0.894	4.5	37	41
SacVal	Liquidambar styraciflua	LIST	dbh	age	years	1/dbh^2	lin	-2.82685	0.73094				0	96	0.03238	42	0.912	0.1	66	40
SacVal	Liquidambar styraciflua	LIST	dbh	crown dia	meters	1	loglogw1	-0.74549	2.24329	0.03499			1.3	13.93	0.18705	43	0.898	1.3	19.5	41
SacVal	Liquidambar styraciflua	LIST	dbh	crown ht	meters	1/dbh	quad	1.98065	0.34302	-0.00092			3.24	25.14	0.22812	44	0.875	3.5	28.5	41
SacVal	Liquidambar styraciflua	LIST	cdia	dbh	meters	1	loglogw1	1.53712	2.67556	0.07225			3.71	88.39	0.26879	43	0.881	3.4	120.5	41
SacVal	Liquidambar styraciflua	LIST	age	dbh	centimeters	1/age	quad	3.71462	1.76501	-0.0092			3.71	88.39	3.0285	42	0.944	3.4	120.5	39
SacVal	Liquidambar styraciflua	LIST	dbh	leaf area	sq. meters	1	loglogw1	-1.29846	5.43689	0.17177			3.97	1067.97	0.41445	38	0.888	6.4	1737.8	36
SacVal	Liquidambar styraciflua	LIST	dbh	tree ht	meters	1/dbh	quad	1.92152	0.42496	-0.00142			3.48	28.38	0.19712	44	0.916	3.5	34	41
SoCalC	Liquidambar styraciflua	LIST	dbh	age	years	1	loglogw1	-0.69616	3.3721	0.05649			1	100	0.23768	32	0.929	1	50	30
SoCalC	Liquidambar styraciflua	LIST	dbh	crown dia	meters	1/dbh^2	quad	0.50662	0.29293	-0.00268			1.03	8.29	0.00102	32	0.962	1.1	9	29
SoCalC	Liquidambar styraciflua	LIST	dbh	crown ht	meters	1	expow1	0.90668	0.03156	0.04235			2.68	10.64	0.20579	32	0.739	2	12	30
SoCalC	Liquidambar styraciflua	LIST	cdia	dbh	meters	1/sqrt(cdia)	loglogw2	1.49004	2.62412	0.01371			1.77	46.21	0.11711	32	0.955	2.2	54	30
SoCalC	Liquidambar styraciflua	LIST	age	dbh	centimeters	1	loglogw1	1.17646	1.72145	0.04807			1.83	45.52	0.21924	32	0.895	2.2	54	30
SoCalC	Liquidambar styraciflua	LIST	dbh	leaf area	sq. meters	1	expow1	1.85541	0.08417	0.64256			10.29	406.58	0.8016	32	0.567	2.4	260	30
SoCalC	Liquidambar styraciflua	LIST	dbh	tree ht	meters	1/dbh	quad	1.90501	0.39675	-0.00244			2.62	14.92	0.0483	32	0.947	3	17	29
TpIntW	Liquidambar styraciflua	LIST	dbh	age	years	1/dbh^2	cub	-1.22757	1.03333	-0.01336	0.00023		2	85	0.01275	33	0.973	3	90	29
TpIntW	Liquidambar styraciflua	LIST	dbh	crown dia	meters	1/dbh	quad	-0.0268	0.30672	-0.00123			0.82	15.25	0.03657	33	0.96	1.2	18.6	30
TpIntW	Liquidambar styraciflua	LIST	dbh	crown ht	meters	1/sqrt(dbh)	loglogw2	-0.80763	2.64786	0.00519			0.96	20.97	0.07205	33	0.965	1.5	26.5	31
TpIntW	Liquidambar styraciflua	LIST	cdia	dbh	meters	1/cdia	lin	-0.6272	4.09648				2.8	68.89	3.28866	33	0.95	3.8	73.9	31
TpIntW	Liquidambar styraciflua	LIST	age	dbh	centimeters	1/age	quad	-0.08849	1.4597	-0.00763			2.8	68.89	0.26025	33	0.986	3.8	73.9	30
TpIntW	Liquidambar styraciflua	LIST	dbh	leaf area	sq. meters	1	loglogw1	-3.927	7.46089	0.19373			0.29	1131.36	0.44015	32	0.949	1	1263	30
TpIntW	Liquidambar styraciflua	LIST	dbh	tree ht	meters	1	loglogw1	-0.23455	2.3345	0.02236			1.58	23.28	0.14955	33	0.939	2.5	28	31
InlEmp	Liriodendron tulipifera	LITU	dbh	age	years	1/dbh^2	cub	-0.17165	0.04245	0.03438	-0.00033		0	65	0.02766	37	0.944	0	65	33
InlEmp	Liriodendron tulipifera	LITU	dbh	crown dia	meters	1/dbh	quad	1.97888	0.35383	-0.00178			2.67	19.07	0.17066	37	0.88	2.3	24.5	34
InlEmp	Liriodendron tulipifera	LITU	dbh	crown ht	meters	1/dbh	quad	1.1692	0.33431	-0.0017			1.82	17.24	0.17972	37	0.861	1.4	23	34
InlEmp	Liriodendron tulipifera	LITU	cdia	dbh	meters	1	loglogw1	0.16395	3.64795	0.11621			1.98	83.06	0.01351	37	0.841	1.7	79.7	35
InlEmp	Liriodendron tulipifera	LITU	age	dbh	centimeters	1/age	cub	1.97704	2.27475	-0.05281	0.00057		1.98	83.06	1.6526	37	0.96	1.7	79.7	33
InlEmp	Liriodendron tulipifera	LITU	dbh	leaf area	sq. meters	1	loglogw1	0.24326	4.21096	0.24744			11.85	762.03	0.06123	35	0.876	1.8	1321.9	33
InlEmp	Liriodendron tulipifera	LITU	dbh	tree ht	meters	1/dbh	quad	2.78857	0.37335	-0.00187			3.52	20.9	0.1726	37	0.89	3.2	26	34
NoCalC	Liriodendron tulipifera	LITU	dbh	age	years	1/sqrt(dbh)	quad	-4.17337	1.63495	-0.01131			0	91	6.42148	34	0.897	0	58	31
NoCalC	Liriodendron tulipifera	LITU	dbh	crown dia	meters	1/dbh	quad	1.76138	0.20441	-0.00083			2.34	13.06	0.02162	33	0.918	3	12.6	30
NoCalC	Liriodendron tulipifera	LITU	dbh	crown ht	meters	1/dbh	loglogw3	-0.33074	1.82002	0.00085			1.23	11.25	0.02917	33	0.897	2.7	11.7	31
NoCalC	Liriodendron tulipifera	LITU	cdia	dbh	meters	1/cdia^2	lin	-11.2012	6.04137				2.84	70	0.50294	33	0.92	2.9	74.3	31
NoCalC	Liriodendron tulipifera	LITU	age	dbh	centimeters	1/age^2	lin	2.84107	0.89367				2.84	84.17	0.05246	34	0.935	2.9	74.3	32
NoCalC	Liriodendron tulipifera	LITU	dbh	leaf area	sq. meters	1	loglogw1	-0.28328	4.20676	0.19729			3.54	438.88	0.44417	34	0.832	4.3	554.4	32
NoCalC	Liriodendron tulipifera	LITU	dbh	tree ht	meters	1/dbh	quad	2.98011	0.35071	-0.00194			3.96	18.78	0.06872	33	0.892	4.8	18.9	30
SacVal	Liriodendron tulipifera	LITU	dbh	age	years	1	loglogw1	-2.38634	4.313	0.31702	0.1005		0	77	0.56305	56	0.936	0.1	89	54
[truncated: 1,278 more rows]

## Sheet: TS6_Growth_coefficients (3)
Region	Scientific Name	SpCode	Independent variable	Predicts component	Units of predicted components	Model weight	EqName	a	b	c or mse	d	e	Apps min	Apps max	Sigma	n	adj R2	Data min (from raw data)	Data max (from raw data)	DF	10	20	30	40	50	60	70	80	90	100	110	120	130	140	150
[truncated: 2,406 more rows]

[truncated: 5 more sheets: Tree Height -2, dbh <Apps max -2, TS4_Growth_eqn_forms, TS5_Foliar_biomass_leaf_samples, TS7_Volume_eqns_from_urban]
